# Supplementary material for: Genetic fusions favor tumorigenesis through degron loss in oncogenes
Source: Nat Commun. 2021 Nov 18;12:6704. doi: 10.1038/s41467-021-26871-y (PMC8602260; doi:10.1038/s41467-021-26871-y)
Supplement: Supplementary file 4 — Dataset 2 [file 41467_2021_26871_MOESM4_ESM.xlsx]

## Sheet: A. Internal degron loss
gene	fraction of inframe fusions	degron loss score	p-value (degron)	q-value (degron)	p-value (cancer type)	combined p-value	combined q-value
5' CCDC6	0.931034	34.35	0.0001	0.01321	0.0001	1.94207e-07	0.000220878
3' RET	0.948718	24.192	0.0001	0.01321	0.0001	1.94207e-07	0.000220878
5' ERG	0.5	9.184	0.0001	0.01321	0.0001	1.94207e-07	0.000220878
5' ZDHHC17	0.692308	6.948	0.0001	0.01321	0.0055	8.47734e-06	0.00723117
5' ANK3	0.5	13.49	0.0001	0.01321	0.0256	3.55213e-05	0.0242397
3' ETV4	0.857143	1.496	0.0184	0.315354	0.0003	7.23514e-05	0.0411438
5' ERBB2	0.555556	10.506	0.0001	0.01321	0.07	9.00872e-05	0.0439111
3' ABL1	0.833333	3.19	0.0011	0.087186	0.01	0.000136594	0.0582572
3' ETV1	1	2.316	0.0017	0.103648	0.0127	0.000253537	0.0657315
5' VPS13B	0.611111	20.018	0.0001	0.01321	0.231	0.000269708	0.0657315
3' NSD1	0.875	7.469	0.0024	0.117422	0.017	0.000453159	0.0657315
5' CDC5L	1	6.051	0.0001	0.01321	0.4317	0.000477044	0.0657315
5' PPP1R12A	0.625	6.955	0.0001	0.01321	0.5604	0.00060464	0.0657315
3' TEX2	0.7	3.18	0.0011	0.087186	0.0527	0.000623501	0.0657315
5' MED26	0.727273	10.68	0.0001	0.01321	0.5837	0.000627402	0.0657315
3' RARA	0.727273	0.61	0.589	1	0.0001	0.000632567	0.0657315
5' PLCB1	0.75	8.866	0.0001	0.01321	0.6369	0.00067903	0.0657315
5' OCLN	0.75	4.221	0.0003	0.0321324	0.2233	0.000710829	0.0657315
5' ARID1A	0.777778	26.224	0.0001	0.01321	0.7495	0.000786877	0.0657315
5' NF1	0.594595	34.461	0.0001	0.01321	0.8124	0.000846367	0.0657315
5' MAST2	0.538462	15.891	0.0001	0.01321	0.816	0.000849756	0.0657315
3' HERC1	0.75	12.669	0.0001	0.01321	1	0.00102103	0.0657315
5' NUP153	0.571429	8.616	0.0001	0.01321	1	0.00102103	0.0657315
5' SETDB1	0.6	6.204	0.0001	0.01321	1	0.00102103	0.0657315
3' BUB1B	0.75	5.82	0.0001	0.01321	1	0.00102103	0.0657315
3' TNRC6B	1	5.606	0.0001	0.01321	1	0.00102103	0.0657315
5' BAIAP2L1	0.571429	5.172	0.0001	0.01321	1	0.00102103	0.0657315
5' SPRED2	1	4.389	0.0001	0.01321	1	0.00102103	0.0657315
5' FAM129B	0.5	4.383	0.0001	0.01321	1	0.00102103	0.0657315
3' SBNO1	1	4.318	0.0001	0.01321	1	0.00102103	0.0657315
5' SLTM	0.666667	3.81	0.0001	0.01321	1	0.00102103	0.0657315
5' ZFPM2	0.5	3.772	0.0001	0.01321	1	0.00102103	0.0657315
5' TRIM33	0.6	3.741	0.0001	0.01321	1	0.00102103	0.0657315
5' ACPP	0.818182	0	1	1	0.0001	0.00102103	0.0657315
5' ASMTL	1	0	1	1	0.0001	0.00102103	0.0657315
5' CDS1	1	0	1	1	0.0001	0.00102103	0.0657315
5' CLDN18	1	0	1	1	0.0001	0.00102103	0.0657315
5' DNAJB1	1	0	1	1	0.0001	0.00102103	0.0657315
5' MRPL48	0.533333	0	1	1	0.0001	0.00102103	0.0657315
5' PML	0.823529	0	1	1	0.0001	0.00102103	0.0657315
5' RAF1	0.866667	0	1	1	0.0001	0.00102103	0.0657315
5' SFTPB	0.875	0	1	1	0.0001	0.00102103	0.0657315
5' SS18	0.785714	0	1	1	0.0001	0.00102103	0.0657315
5' TMPRSS2	0.661538	0	1	1	0.0001	0.00102103	0.0657315
5' UBTF	0.777778	0	1	1	0.0001	0.00102103	0.0657315
3' AGGF1	1	0	1	1	0.0001	0.00102103	0.0657315
3' CSN2	0.727273	0	1	1	0.0001	0.00102103	0.0657315
3' DTX4	1	0	1	1	0.0001	0.00102103	0.0657315
3' ERG	0.705882	0	1	1	0.0001	0.00102103	0.0657315
3' MAML3	0.9	0	1	1	0.0001	0.00102103	0.0657315
3' PRKACA	0.875	0	1	1	0.0001	0.00102103	0.0657315
3' SEPT14	0.833333	0	1	1	0.0001	0.00102103	0.0657315
3' TFE3	0.933333	0	1	1	0.0001	0.00102103	0.0657315
5' ARHGAP23	0.625	4.827	0.0002	0.0226457	0.5617	0.00113396	0.0716493
5' MICALL1	1	4.153	0.0003	0.0321324	0.3885	0.00117217	0.0727169
5' IGF1R	0.714286	3.975	0.0014	0.0973368	0.0929	0.00129377	0.0781033
5' EML4	0.833333	5.463	0.0019	0.110731	0.0691	0.00130477	0.0781033
5' MLLT10	0.5	4.17	0.0004	0.0406462	0.3952	0.00154166	0.0906922
3' NAV3	0.555556	5.204	0.0146	0.275523	0.012	0.00169061	0.0977687
5' ITGB6	1	3.3	0.0033	0.130779	0.0554	0.00175635	0.099878
5' DDX42	0.666667	2.768	0.0023	0.117422	0.0848	0.00186113	0.0999159
5' ZNF423	0.666667	3.862	0.0002	0.0226457	1	0.00190344	0.0999159
5' CAMSAP2	0.5	2.962	0.0002	0.0226457	1	0.00190344	0.0999159
3' ARHGAP26	0.928571	0	1	1	0.0002	0.00190344	0.0999159
3' HP	0.833333	0	1	1	0.0002	0.00190344	0.0999159
5' DYRK2	1	2.808	0.0024	0.117422	0.0848	0.00193339	0.0999503
3' RIOK3	0.666667	1.544	0.0028	0.123293	0.0854	0.00223303	0.113434
3' POGZ	0.666667	1.891	0.0029	0.123577	0.0836	0.00226069	0.113434
3' RBX1	0.6	2.457	0.0012	0.0914538	0.2187	0.00242639	0.119939
5' RSRC2	1	2.702	0.0031	0.127972	0.086	0.00246065	0.119939
5' ANKRD17	0.5	5.43	0.0035	0.134459	0.0844	0.00269617	0.129568
3' SLC4A4	0.5	2.722	0.0016	0.103648	0.2264	0.00323234	0.153177
5' NFIX	0.578947	5.994	0.0009	0.07926	0.4188	0.00334836	0.156501
5' PAX8	0.888889	0	1	1	0.0004	0.00352962	0.160574
3' BRAF	0.863636	0	1	1	0.0004	0.00352962	0.160574
3' SMG6	0.857143	2.804	0.0027	0.121592	0.1524	0.00361928	0.162486
5' CCM2	0.8	2.688	0.0107	0.240932	0.0401	0.00375603	0.166436
3' MSI2	0.5625	0	1	1	0.0005	0.00430045	0.188117
3' FIP1L1	0.5	2.133	0.0024	0.117422	0.228	0.00465705	0.201138
5' CABLES1	0.714286	0	1	1	0.0007	0.0057851	0.240717
5' PIP4K2B	0.5	0	1	1	0.0007	0.0057851	0.240717
3' SSX2	1	0	1	1	0.0007	0.0057851	0.240717
5' GON4L	0.666667	10.14	0.0012	0.0914538	0.6403	0.00627846	0.252206
5' APP	0.625	3.924	0.0014	0.0973368	0.5576	0.00636643	0.252206
5' RYR3	0.666667	5.982	0.0008	0.0737302	1	0.00650472	0.252206
3' HSP90B1	1	3.116	0.0008	0.0737302	1	0.00650472	0.252206
5' PPFIA2	0.833333	0	1	1	0.0008	0.00650472	0.252206
5' SFPQ	0.777778	0	1	1	0.0008	0.00650472	0.252206
3' FAF1	0.571429	2.48	0.0021	0.115587	0.3941	0.00670113	0.254255
3' IKBKB	0.666667	1.32	0.0097	0.232976	0.0854	0.0067066	0.254255
3' CLPTM1L	0.666667	2.604	0.0021	0.115587	0.403	0.00683356	0.256221
3' PKP4	0.666667	1.25	0.0101	0.236842	0.0851	0.00692692	0.256898
3' PDS5A	1	2.847	0.0009	0.07926	1	0.0072118	0.264588
3' ETV6	1	2.382	0.0024	0.117422	0.3842	0.00736639	0.267384
5' DOCK7	0.75	6.3	0.0047	0.156522	0.2208	0.00816789	0.293356
3' CCSER1	0.666667	2.556	0.0011	0.087186	1	0.00859369	0.29976
3' TNNI3K	1	2.101	0.0011	0.087186	1	0.00859369	0.29976
5' CHD6	0.571429	7.388	0.0028	0.123293	0.3937	0.00860976	0.29976
5' SNX27	0.777778	4.641	0.0014	0.0973368	1	0.0105998	0.358084
5' ATP11A	0.555556	3.729	0.0014	0.0973368	1	0.0105998	0.358084
5' ARID4B	0.6	3.105	0.0014	0.0973368	1	0.0105998	0.358084
5' ZFHX3	0.5	5.766	0.0065	0.190811	0.2267	0.0110812	0.362884
5' PHF21A	0.636364	4.368	0.0018	0.106469	0.8219	0.0111195	0.362884
5' MAP1B	0.5	5.734	0.0015	0.100754	1	0.0112534	0.362884
3' TCF7L2	0.571429	0	1	1	0.0015	0.0112534	0.362884
5' PRC1	1	1.45	0.0197	0.32803	0.0763	0.0112737	0.362884
5' ZNF292	0.545455	8.61	0.0072	0.203811	0.2194	0.0117695	0.372188
5' MAP2K2	0.666667	3.228	0.0039	0.135576	0.4055	0.0117809	0.372188
3' MARK3	0.5	2.304	0.0016	0.103648	1	0.0119004	0.372515
5' SRCAP	0.666667	5.528	0.0017	0.103648	1	0.0125411	0.382056
3' IDE	0.666667	1.893	0.0017	0.103648	1	0.0125411	0.382056
3' SSX1	1	0	1	1	0.0017	0.0125411	0.382056
5' PDGFRA	1	2.127	0.0079	0.218935	0.2228	0.0129235	0.39022
3' MDM1	0.5	1.983	0.0018	0.106469	1	0.0131759	0.390925
5' CLPB	0.666667	0	1	1	0.0018	0.0131759	0.390925
3' MLLT10	1	1.39	0.0083	0.224927	0.2242	0.0135596	0.394905
5' NOP58	1	2.232	0.0084	0.224927	0.2251	0.0137478	0.394905
5' PIAS1	1	2.121	0.0082	0.224114	0.2306	0.0137483	0.394905
5' IRF2BP2	0.75	2.283	0.0084	0.224927	0.2274	0.0138688	0.394905
5' ALCAM	0.75	2.16	0.0085	0.226077	0.2251	0.0138888	0.394905
5' METTL25	0.8	0	1	1	0.002	0.0144292	0.40452
3' MAP2	1	2.887	0.0233	0.362109	0.088	0.0147418	0.40452
5' JMJD1C	0.8	7.584	0.0037	0.134459	0.5591	0.0148548	0.40452
5' RIMKLB	1	3.224	0.0021	0.115587	1	0.0150482	0.40452
5' SYNRG	0.571429	0	1	1	0.0021	0.0150482	0.40452
3' SFTPB	0.5	0	1	1	0.0021	0.0150482	0.40452
3' PHF12	0.6	1.366	0.0093	0.231798	0.2263	0.0150765	0.40452
5' YEATS2	1	2.676	0.0365	0.46362	0.0581	0.0151754	0.40452
5' TRIM28	0.666667	1.391	0.0263	0.384601	0.0824	0.015461	0.404851
5' CHD4	0.666667	0	1	1	0.0022	0.0156625	0.404851
5' PBX1	0.75	0	1	1	0.0022	0.0156625	0.404851
3' ROS1	1	0	1	1	0.0022	0.0156625	0.404851
5' CAMKK2	0.666667	0	1	1	0.0023	0.0162721	0.417448
5' NEDD9	0.666667	2.211	0.0024	0.117422	1	0.0168775	0.426563
3' ANO3	1	1.634	0.0024	0.117422	1	0.0168775	0.426563
5' NLK	0.5	2.812	0.0061	0.184537	0.4026	0.0172138	0.431864
5' NEO1	0.75	2.076	0.0111	0.248527	0.2247	0.0174437	0.432154
3' UBAP2L	1	1.952	0.0025	0.119367	1	0.0174787	0.432154
3' ASAP1	1	0.737	0.0299	0.409966	0.0849	0.0177091	0.434701
3' ANAPC16	0.75	2.076	0.0027	0.121592	1	0.0186692	0.451767
3' DGCR8	0.666667	2.022	0.0027	0.121592	1	0.0186692	0.451767
5' CCNY	0.666667	3.055	0.0125	0.260072	0.224	0.0192588	0.458392
5' NCOA4	1	0	1	1	0.0028	0.0192588	0.458392
5' PTGFRN	1	2.07	0.0126	0.260072	0.2234	0.019346	0.458392
5' RUNX1	0.5	0	1	1	0.0029	0.0198448	0.463771
5' TMEM135	0.545455	0	1	1	0.0029	0.0198448	0.463771
3' POLR3B	1	1.474	0.003	0.126479	1	0.0204274	0.470935
3' PPARG	0.6	0	1	1	0.003	0.0204274	0.470935
3' CTSB	0.8	0	1	1	0.0031	0.0210067	0.481039
5' NFE2L1	0.857143	3.618	0.0033	0.130779	1	0.0221556	0.497336
5' TXNDC11	0.5	2.504	0.0033	0.130779	1	0.0221556	0.497336
3' UBE2E3	0.75	1.932	0.0033	0.130779	1	0.0221556	0.497336
5' ATF2	1	2.187	0.0035	0.134459	1	0.0232925	0.510298
5' EGFR	0.772727	0	1	1	0.0035	0.0232925	0.510298
5' TRPS1	0.666667	0	1	1	0.0035	0.0232925	0.510298
5' UBR5	0.5	6.44	0.0036	0.134459	1	0.0238566	0.510298
5' PIAS2	1	2.562	0.0036	0.134459	1	0.0238566	0.510298
3' USP10	0.6	1.98	0.0036	0.134459	1	0.0238566	0.510298
3' FNDC3B	0.75	1.262	0.0164	0.295424	0.2222	0.0241043	0.510298
3' FZR1	0.666667	0.695	0.0444	0.538095	0.0824	0.0241856	0.510298
5' SCMH1	0.6	2.792	0.0037	0.134459	1	0.0244179	0.510298
5' RBPJ	0.666667	2.54	0.0037	0.134459	1	0.0244179	0.510298
5' EHF	1	2.031	0.0165	0.29588	0.2266	0.0246355	0.510298
5' ATP9B	1	1.354	0.045	0.542052	0.0832	0.024664	0.510298
3' AK5	1	1.971	0.0038	0.134459	1	0.0249765	0.510298
3' GATA6	1	1.45	0.0038	0.134459	1	0.0249765	0.510298
3' EIF1	0.666667	1.388	0.0038	0.134459	1	0.0249765	0.510298
5' SDK1	0.5	5.293	0.0039	0.135576	1	0.0255324	0.518552
5' TRAF7	0.666667	1.318	0.0491	0.579117	0.0803	0.0257692	0.520264
3' RUNX1T1	0.8	0	1	1	0.004	0.0260858	0.523558
3' HDAC8	0.666667	1.396	0.0041	0.140072	1	0.0266368	0.529855
3' TENM4	0.545455	2.54	0.1576	1	0.0261	0.0267102	0.529855
5' ADGRF5	1	1.326	0.0517	0.604387	0.0808	0.0270613	0.53308
3' PLEKHG1	0.666667	1.484	0.0042	0.142262	1	0.0271852	0.53308
5' USP31	0.75	2.752	0.0043	0.144414	1	0.0277313	0.537609
3' FLNA	1	0	1	1	0.0043	0.0277313	0.537609
3' C11orf80	0.666667	0	1	1	0.0044	0.0282751	0.545054
5' BCL9	1	1.284	0.0533	0.614035	0.0859	0.0292399	0.560486
3' CDK17	0.5	0.677	0.057	0.643564	0.0832	0.03012	0.571913
5' HMGA2	0.6875	0	1	1	0.0048	0.0304279	0.571913
3' TPO	0.666667	1.396	0.0049	0.161822	1	0.0309607	0.571913
5' ABCC3	1	4.548	0.2005	1	0.0245	0.0310259	0.571913
5' FMN1	0.5	2.628	0.0123	0.260006	0.401	0.0311324	0.571913
3' KIF22	0.75	1.212	0.0227	0.361565	0.2192	0.0313635	0.571913
3' STRADA	0.5	1.414	0.005	0.16376	1	0.0314916	0.571913
3' NTRK3	0.875	0	1	1	0.005	0.0314916	0.571913
5' MCM5	0.5	1.965	0.0227	0.361565	0.2208	0.031556	0.571913
5' SUFU	0.833333	2.872	0.0089	0.226094	0.5652	0.0316519	0.571913
5' SMC5	1	1.264	0.0635	0.67648	0.0793	0.0316798	0.571913
3' ALKBH5	0.6	1.806	0.0051	0.165666	1	0.0320204	0.573994
5' MVP	0.666667	1.24	0.0623	0.67403	0.0822	0.0321315	0.573994
3' LARP4	1	1.366	0.0052	0.16619	1	0.0325473	0.578393
5' EPC1	0.6	1.938	0.0233	0.362109	0.2265	0.032954	0.581663
5' PRKCE	1	2.048	0.0053	0.168031	1	0.0330723	0.581663
5' OSBP2	1	3.325	0.0054	0.169843	1	0.0335953	0.587832
5' INPP5A	0.7	3.39	0.0129	0.263519	0.4247	0.0340053	0.59197
5' WDR70	0.714286	0.683	0.3308	1	0.0168	0.0344151	0.596063
5' ERN1	0.8	2.576	0.0144	0.275523	0.3906	0.0347636	0.596516
5' CBL	0.666667	2.472	0.0143	0.275523	0.3937	0.0347909	0.596516
3' DENND1A	0.666667	1.382	0.0143	0.275523	0.3963	0.0349834	0.596817
5' STK10	0.8	2.512	0.0146	0.275523	0.3948	0.0354843	0.602351
3' CUX2	1	1.372	0.0058	0.180987	1	0.0356694	0.602495
5' TXNRD1	0.5	1.204	0.0676	0.699413	0.087	0.036087	0.605187
5' WIPF2	0.5	2.669	0.0059	0.18267	1	0.0361835	0.605187
5' ACAP3	0.75	2.552	0.0061	0.184537	1	0.0372067	0.619265
5' KDM3A	0.8	2.259	0.0161	0.29268	0.3913	0.038223	0.63004
3' EPN2	0.5	1.374	0.0063	0.189143	1	0.0382234	0.63004
5' KPNA4	0.8	2.856	0.0064	0.190701	1	0.0387293	0.63531
3' MACROD1	0.5	1.314	0.0065	0.190811	1	0.0392337	0.640504
3' TP53	0.75	1.458	0.0066	0.192322	1	0.0397365	0.642564
5' BRAF	0.818182	0	1	1	0.0066	0.0397365	0.642564
5' GTF2F2	1	3.03	0.0279	0.393479	0.2421	0.0405109	0.651996
5' LRP8	0.666667	2.584	0.0174	0.303772	0.3965	0.0412315	0.660479
5' PARD3B	1	2.808	0.0071	0.203811	1	0.0422284	0.673286
3' TBK1	0.75	1.43	0.0072	0.203811	1	0.0427225	0.677995
5' ARAP1	0.5	2.283	0.0073	0.205177	1	0.0432151	0.682639
5' COMMD9	0.75	1.863	0.033	0.433043	0.226	0.0439908	0.688576
3' VAV1	0.666667	0.625	0.0908	0.866906	0.0823	0.0440635	0.688576
5' CDC27	0.888889	3.99	0.0075	0.209313	1	0.0441964	0.688576
3' PITPNC1	0.636364	0	1	1	0.008	0.0466265	0.723135
5' KAT6B	0.6	5.875	0.0081	0.222919	1	0.0471087	0.725168
5' TBC1D4	1	1.47	0.0348	0.444879	0.2332	0.0471827	0.725168
3' PITPNM1	0.666667	0.613	0.1003	0.930887	0.0824	0.0479003	0.732897
5' ETV6	0.85	3.97	0.0858	0.831358	0.0999	0.0493656	0.741754
3' ULK4	0.666667	1.288	0.0086	0.226094	1	0.0495015	0.741754
5' CEP350	0.75	4.222	0.0387	0.485342	0.223	0.0496446	0.741754
5' AKAP9	1	6.871	0.0153	0.284666	0.5672	0.0498729	0.741754
5' UBE2R2	0.75	2.49	0.0087	0.226094	1	0.0499766	0.741754
3' IGF2	0.764706	0	1	1	0.0087	0.0499766	0.741754
3' COPS4	1	1.286	0.0088	0.226094	1	0.0504504	0.741754
5' SLC4A4	0.5	0.73	0.0993	0.925943	0.0893	0.0507696	0.741754
5' CKAP5	1	5.847	0.0089	0.226094	1	0.0509232	0.741754
5' NPLOC4	0.5	2.13	0.0089	0.226094	1	0.0509232	0.741754
5' FRYL	1	4.179	0.0422	0.51458	0.2117	0.0510824	0.741754
3' CDH10	0.666667	0.604	0.1142	1	0.0788	0.0513899	0.741754
5' NAA15	0.75	2.124	0.009	0.227178	1	0.0513948	0.741754
5' DENND1A	0.5	2.073	0.0229	0.361565	0.3942	0.0515228	0.741754
3' TP53I3	1	0.764	0.0401	0.499737	0.2269	0.0518591	0.743459
3' SNTB2	0.5	1.28	0.0092	0.230757	1	0.0523347	0.747138
5' KAZN	0.5	2.172	0.0094	0.232826	1	0.0532702	0.755418
5' ABCC4	0.75	2.091	0.0095	0.232976	1	0.0537364	0.755418
3' PPFIA2	0.833333	0	1	1	0.0095	0.0537364	0.755418
3' APP	0.6	1.386	0.0096	0.232976	1	0.0542015	0.755418
3' STK10	0.666667	1.256	0.0096	0.232976	1	0.0542015	0.755418
3' TXNRD1	0.5	0.602	0.1136	1	0.0849	0.0544088	0.755418
5' EPB41L4A	0.6	2.115	0.0097	0.232976	1	0.0546656	0.755418
3' RPP30	1	1.3	0.0098	0.23396	1	0.0551287	0.755418
5' PITPNC1	0.555556	0	1	1	0.0098	0.0551287	0.755418
3' RAB3IP	0.555556	0	1	1	0.0098	0.0551287	0.755418
3' NET1	0.5	1.244	0.0099	0.234932	1	0.0555907	0.758702
3' UBR4	0.666667	4.032	0.01	0.235893	1	0.0560517	0.761946
3' LIX1L	0.5	1.252	0.0103	0.237319	1	0.0574288	0.774494
3' NID1	0.666667	1.232	0.0103	0.237319	1	0.0574288	0.774494
3' WDR72	1	1.214	0.0106	0.240932	1	0.0587972	0.783656
5' ARMC8	0.5	0	1	1	0.0106	0.0587972	0.783656
3' INSR	0.625	0	1	1	0.0106	0.0587972	0.783656
3' YY1	1	0.717	0.0475	0.565293	0.2296	0.0601841	0.79902
3' NBEA	1	0	1	1	0.011	0.0606085	0.801535
5' ENTPD1	1	0	1	1	0.0111	0.061059	0.804376
3' HNF1B	0.5	1.206	0.0112	0.249357	1	0.0615086	0.807182
3' GAB2	0.5	0	1	1	0.0113	0.0619574	0.809956
3' SNTA1	1	1.248	0.0116	0.252587	1	0.0632983	0.818083
3' ETV5	0.5	0.823	0.0116	0.252587	1	0.0632983	0.818083
5' SLC45A3	0.75	0	1	1	0.0116	0.0632983	0.818083
5' CNN3	1	2.648	0.0117	0.253372	1	0.0637435	0.819281
5' ACO2	0.555556	0	1	1	0.012	0.0650742	0.819281
3' TTC28	0.6	0	1	1	0.012	0.0650742	0.819281
5' CTNNA3	1	0	1	1	0.0122	0.0659571	0.819281
5' LUC7L2	0.6	0	1	1	0.0122	0.0659571	0.819281
5' NUP98	0.5	0	1	1	0.0122	0.0659571	0.819281
3' CC2D2B	1	0	1	1	0.0122	0.0659571	0.819281
3' SKAP2	0.5	1.206	0.0123	0.260006	1	0.0663973	0.819281
3' CDH23	0.75	0	1	1	0.0123	0.0663973	0.819281
5' THRA	0.5	2.6	0.0124	0.260006	1	0.0668367	0.819281
3' MTRR	1	1.234	0.0124	0.260006	1	0.0668367	0.819281
3' KIF5A	1	1.21	0.0124	0.260006	1	0.0668367	0.819281
5' EIF2AK2	0.6	0	1	1	0.0124	0.0668367	0.819281
5' PDE7A	0.6	0	1	1	0.0124	0.0668367	0.819281
5' STK39	0.625	2.404	0.022	0.35732	0.568	0.0672578	0.819281
5' UBE2Z	0.5	0	1	1	0.0125	0.0672753	0.819281
5' RLF	0.833333	6.59	0.0225	0.361565	0.5591	0.0676245	0.819281
3' CPA1	0.6	0	1	1	0.0126	0.0677131	0.819281
5' TESMIN	0.6	0	1	1	0.0127	0.0681501	0.820006
3' SNTG1	0.6	0	1	1	0.0128	0.0685864	0.820006
5' SQSTM1	0.5	1.734	0.0129	0.263519	1	0.0690218	0.820006
5' NEU3	1	0	1	1	0.0129	0.0690218	0.820006
5' YEATS4	0.5	0	1	1	0.0131	0.0698904	0.820006
3' RBBP8	0.6	0	1	1	0.0131	0.0698904	0.820006
3' COMMD1	1	0	1	1	0.0132	0.0703235	0.820006
3' PRSS2	1	0	1	1	0.0132	0.0703235	0.820006
3' THSD4	0.75	0	1	1	0.0132	0.0703235	0.820006
3' EML2	0.666667	1.224	0.0133	0.268847	1	0.0707559	0.820006
3' WWTR1	0.5	0.832	0.0133	0.268847	1	0.0707559	0.820006
3' NUP107	0.6	0	1	1	0.0134	0.0711875	0.820006
5' CSTF3	0.666667	1.506	0.0135	0.268847	1	0.0716184	0.820006
3' ULK2	0.5	1.222	0.0135	0.268847	1	0.0716184	0.820006
3' TPST1	0.666667	1.21	0.0135	0.268847	1	0.0716184	0.820006
5' NTN4	0.6	0	1	1	0.0135	0.0716184	0.820006
3' NKAIN3	0.6	0	1	1	0.0138	0.0729066	0.831964
5' GRIK2	0.5	1.534	0.014	0.275523	1	0.0737618	0.83613
3' CTDSPL	0.75	0	1	1	0.014	0.0737618	0.83613
3' AVIL	0.875	0	1	1	0.0141	0.0741883	0.83818
5' KIF27	1	2.568	0.0142	0.275523	1	0.0746141	0.840209
5' NNT	1	1.536	0.0143	0.275523	1	0.0750392	0.842216
5' DDX39B	0.8	2.516	0.0144	0.275523	1	0.0754636	0.844203
3' ZFPM2	0.5	1.237	0.0146	0.275523	1	0.0763103	0.850885
5' KMT2D	0.5	4.082	0.0151	0.28227	1	0.0784152	0.868678
5' TNPO1	0.8	2.124	0.0151	0.28227	1	0.0784152	0.868678
5' TFDP1	1	0.632	0.2083	1	0.0772	0.0824964	0.910931
3' AKAP6	0.833333	2.596	0.1167	1	0.1388	0.08298	0.913316
3' SHANK2	0.526316	0	1	1	0.0163	0.0834004	0.914991
5' ANKIB1	1	2.004	0.0164	0.295424	1	0.0838118	0.916557
3' BIRC6	1	3.409	0.0169	0.300335	1	0.0858595	0.93297
5' ENG	1	2.034	0.0169	0.300335	1	0.0858595	0.93297
5' DYNC1LI1	1	1.52	0.017	0.300763	1	0.0862672	0.934425
5' PGD	0.6	2.025	0.0173	0.303362	1	0.0874869	0.941658
5' ATP8A1	0.5	1.472	0.0173	0.303362	1	0.0874869	0.941658
5' CREB3L2	0.75	1.352	0.075	0.748678	0.2326	0.0880746	0.94442
5' RNF121	0.571429	0	1	1	0.0175	0.0882972	0.94442
3' CAT	0.888889	0	1	1	0.0176	0.0887015	0.945779
5' TANC1	1	4.074	0.0179	0.309772	1	0.0899109	0.95272
5' PRPF18	1	1.436	0.0179	0.309772	1	0.0899109	0.95272
5' ARHGAP31	1	1.472	0.0182	0.313594	1	0.0911153	0.962493
5' FRS2	0.666667	0.625	0.2151	1	0.0851	0.0915357	0.96395
5' SLC9A9	1	1.468	0.0185	0.315354	1	0.0923147	0.965644
5' EXOC1	0.5	1.458	0.0186	0.315354	1	0.0927134	0.965644
3' ATP23	0.636364	0	1	1	0.0186	0.0927134	0.965644
5' ZMYND11	1	1.422	0.0187	0.315354	1	0.0931116	0.965644
3' ACLY	0.75	1.244	0.0187	0.315354	1	0.0931116	0.965644
5' DPYD	0.5	2.016	0.0188	0.315697	1	0.0935093	0.966829
3' DGKB	0.5	1.274	0.0191	0.319381	1	0.0946991	0.976173
5' TGFBR3	0.666667	1.4	0.0207	0.34039	1	0.100967	1
3' ADAMTS12	0.5	1.809	0.0924	0.873941	0.2283	0.102494	1
3' AGO3	0.6	1.252	0.0214	0.349005	1	0.103669	1
5' UBE4B	0.6	2.56	0.0338	0.439178	0.6345	0.103847	1
3' LTBP1	1	1.842	0.0949	0.893322	0.2269	0.10418	1
3' ACACA	0.5	0.631	0.2734	1	0.0815	0.107043	1
5' VPS26A	0.666667	1.436	0.0224	0.361565	1	0.107491	1
3' FAM168A	0.833333	1.282	0.0409	0.506521	0.5558	0.10875	1
3' MADD	1	2.798	0.0229	0.361565	1	0.109385	1
5' RAP1GAP2	1	1.436	0.0229	0.361565	1	0.109385	1
3' CTDSPL2	1	0.771	0.023	0.361702	1	0.109762	1
5' PDXDC1	0.5	1.432	0.0232	0.362109	1	0.110516	1
5' SASH1	0.777778	2.448	0.0544	0.623573	0.4285	0.110931	1
3' EPHA3	1	1.202	0.0234	0.362243	1	0.111267	1
5' STRN3	1	2.058	0.0235	0.362375	1	0.111643	1
3' KIF6	0.5	1.212	0.0238	0.365579	1	0.112766	1
5' SPAG17	1	1.386	0.2808	1	0.0856	0.113649	1
3' NTRK1	1	0	1	1	0.0241	0.113886	1
3' UBR5	0.666667	3.22	0.0242	0.367451	1	0.114258	1
5' FRMD4B	0.75	1.923	0.025	0.376785	1	0.117222	1
5' GSR	0.5	1.396	0.0251	0.376785	1	0.117591	1
3' TMEM67	1	0.761	0.0251	0.376785	1	0.117591	1
5' PTPRF	0.5	4.8	0.0254	0.37985	1	0.118694	1
5' TRAF3	0.6	1.929	0.0259	0.384426	1	0.120526	1
3' ALK	0.866667	0	1	1	0.0259	0.120526	1
5' TFG	0.6	1.202	0.1148	1	0.2279	0.121485	1
5' FZR1	0.5	1.39	0.0263	0.384601	1	0.121984	1
5' NFE2L2	0.571429	2.058	0.0264	0.384644	1	0.122348	1
5' BCR	0.545455	0	1	1	0.0268	0.123799	1
3' NFIX	0.666667	0	1	1	0.0271	0.124883	1
3' CA10	0.5	0	1	1	0.0272	0.125243	1
5' GRAMD1A	1	1.384	0.0273	0.391992	1	0.125604	1
5' APPL2	1	1.38	0.0273	0.391992	1	0.125604	1
3' EPHA1	0.666667	0.732	0.0274	0.392008	1	0.125964	1
3' BRIP1	0.857143	0	1	1	0.0274	0.125964	1
3' DLG2	0.666667	0	1	1	0.0274	0.125964	1
5' RPS6KA2	1	1.929	0.0277	0.393469	1	0.127041	1
5' SIK2	0.75	1.923	0.0278	0.393469	1	0.1274	1
5' SKI	0.5	1.803	0.0278	0.393469	1	0.1274	1
5' EP300	0.555556	5.733	0.0505	0.593862	0.5533	0.127907	1
5' MAPKAPK3	1	1.911	0.0284	0.3963	1	0.129543	1
3' SUFU	0.666667	0.718	0.0291	0.403204	1	0.132027	1
3' MSRA	1	0.742	0.0292	0.403204	1	0.132381	1
5' CIAO1	0.666667	1.386	0.0297	0.408684	1	0.134143	1
5' EPS15	0.6	1.803	0.03	0.409966	1	0.135197	1
3' ZNF76	1	0.716	0.0305	0.413943	1	0.136946	1
5' TLN1	1	0.729	0.3887	1	0.0787	0.137262	1
3' CCND1	1	0.722	0.0311	0.419215	1	0.139034	1
5' TP53	0.75	1.812	0.0316	0.423077	1	0.140765	1
5' AAK1	0.75	1.478	0.0316	0.423077	1	0.140765	1
5' USP48	0.571429	2.01	0.0322	0.429659	1	0.142832	1
5' IPO7	0.75	1.803	0.0326	0.433043	1	0.144204	1
3' SETD2	0.666667	2.588	0.0327	0.433043	1	0.144546	1
5' MYO9A	0.5	0.717	0.3925	1	0.0835	0.144799	1
5' GAS2L3	0.75	1.878	0.0329	0.433043	1	0.14523	1
3' VPS13B	0.571429	2.516	0.084	0.817916	0.392	0.145325	1
5' DTX4	0.75	1.536	0.033	0.433043	1	0.145571	1
3' KHDRBS3	0.833333	1.31	0.0334	0.435409	1	0.146933	1
5' VMP1	0.5625	0	1	1	0.0344	0.150318	1
5' UBA2	0.5	1.488	0.0345	0.443907	1	0.150654	1
3' ADARB2	0.5	0.702	0.0348	0.444879	1	0.151663	1
3' ATP13A1	1	0.601	0.1616	1	0.2193	0.153803	1
5' USP32	0.6	6.633	0.3522	1	0.1008	0.154013	1
5' ARFGEF2	0.714286	3.385	0.2682	1	0.1361	0.157338	1
3' SIPA1L3	0.636364	3.854	0.0847	0.822711	0.4334	0.158022	1
5' CUX2	0.666667	1.372	0.0372	0.471002	1	0.159642	1
3' TACC3	0.763158	0	1	1	0.0373	0.159971	1
3' NMT2	1	0.695	0.0385	0.484367	1	0.163898	1
5' OS9	0.769231	0	1	1	0.0385	0.163898	1
5' SLC35E3	0.666667	0	1	1	0.0392	0.166172	1
5' MYLK	0.6	0	1	1	0.0394	0.166819	1
5' SMAP1	0.666667	1.368	0.0401	0.499737	1	0.169077	1
5' CDH23	1	0.656	0.4807	1	0.0836	0.169355	1
5' NUMB	0.5	1.364	0.0404	0.501897	1	0.170041	1
3' RAD51C	0.571429	0	1	1	0.0404	0.170041	1
5' LYZ	0.8	0	1	1	0.041	0.171962	1
5' SMARCB1	0.666667	1.355	0.0411	0.506724	1	0.172281	1
5' SLC44A1	0.666667	1.362	0.0413	0.506724	1	0.172919	1
5' PDZRN3	0.8	0	1	1	0.0413	0.172919	1
3' MTUS2	0.666667	0	1	1	0.0417	0.174191	1
3' NOP16	1	0.698	0.0418	0.511276	1	0.174509	1
5' NKD1	0.8	0	1	1	0.0418	0.174509	1
5' ASCC1	0.666667	0	1	1	0.0421	0.17546	1
5' CPS1	0.666667	0	1	1	0.0421	0.17546	1
5' APPBP2	0.5	0	1	1	0.0422	0.175777	1
5' AGGF1	1	0	1	1	0.0423	0.176094	1
3' DPP6	1	0	1	1	0.0423	0.176094	1
5' NVL	0.571429	0	1	1	0.0424	0.17641	1
3' NOD2	1	0	1	1	0.0424	0.17641	1
5' CDH1	0.5	0	1	1	0.0429	0.177987	1
3' LYRM4	0.666667	0	1	1	0.043	0.178302	1
3' GRAMD1A	0.666667	0.692	0.0431	0.523943	1	0.178616	1
3' RAF1	0.888889	0	1	1	0.0433	0.179245	1
5' NTRK3	0.8	0	1	1	0.0434	0.179559	1
5' PTPN1	0.8	0	1	1	0.0436	0.180186	1
3' COL1A2	0.571429	0	1	1	0.0439	0.181124	1
3' MED24	0.5	0	1	1	0.0439	0.181124	1
3' WNT5B	0.8	0	1	1	0.0442	0.182061	1
3' PPFIBP1	0.666667	0	1	1	0.0444	0.182685	1
3' PIP4K2C	0.571429	0	1	1	0.0448	0.183929	1
3' MAST1	0.5	2.008	0.0463	0.556021	1	0.188562	1
5' ADAM22	1	1.342	0.0466	0.557933	1	0.189483	1
3' GRIP1	0.5	0	1	1	0.0467	0.189789	1
5' COL4A1	1	0	1	1	0.0469	0.190402	1
3' VSNL1	1	0.676	0.0477	0.565467	1	0.192843	1
3' METTL3	1	0.683	0.0478	0.565467	1	0.193147	1
5' BCAS3	0.513514	0	1	1	0.0484	0.194968	1
3' SMG1	1	1.974	0.126	1	0.393	0.19834	1
5' TAF4	0.75	0	1	1	0.0506	0.20158	1
5' RB1	0.538462	0	1	1	0.0509	0.202475	1
3' ACTG2	0.833333	0	1	1	0.0514	0.203961	1
5' GALNT7	1	0	1	1	0.0515	0.204258	1
5' ATP6V0A1	0.75	1.387	0.0517	0.604387	1	0.204851	1
5' NADSYN1	0.666667	0	1	1	0.0521	0.206034	1
5' LARP4B	0.5	1.31	0.0522	0.606038	1	0.20633	1
5' TMCC1	0.666667	1.298	0.0523	0.606038	1	0.206625	1
3' TSPAN31	0.571429	0	1	1	0.0525	0.207214	1
5' ROBO1	0.6	2.432	0.2334	1	0.2264	0.20822	1
3' NSMCE2	0.571429	0	1	1	0.0529	0.208392	1
5' FGFR3	0.810811	0	1	1	0.0533	0.209566	1
3' RALY	0.666667	0.662	0.1372	1	0.392	0.210978	1
3' ACOT7	0.8	0	1	1	0.0543	0.212488	1
5' PCBP2	0.5	0	1	1	0.0544	0.21278	1
5' NAALADL2	0.5	0	1	1	0.0545	0.213071	1
5' KIF5B	0.666667	1.311	0.0546	0.623573	1	0.213362	1
3' NCOA1	0.666667	0.673	0.0546	0.623573	1	0.213362	1
5' EFR3A	0.8	0	1	1	0.0563	0.218279	1
3' ZMYM4	0.666667	1.472	0.0567	0.642006	1	0.219428	1
5' TFE3	0.8	0	1	1	0.0576	0.222004	1
5' LEMD3	0.8	0	1	1	0.0579	0.222859	1
3' SRCIN1	1	0	1	1	0.0583	0.223998	1
5' EPB41	1	1.275	0.0584	0.655635	1	0.224282	1
5' KCMF1	0.5	1.272	0.0586	0.656022	1	0.224849	1
3' ITPR1	1	3.023	0.0591	0.657903	1	0.226266	1
5' SGK3	1	1.302	0.0591	0.657903	1	0.226266	1
5' EIF2S2	0.6	0.643	0.2677	1	0.2211	0.226516	1
3' B4GALNT2	0.5	0	1	1	0.0597	0.22796	1
5' FOXO1	0.666667	1.306	0.0603	0.669381	1	0.229648	1
5' MB21D2	1	1.254	0.0607	0.671939	1	0.23077	1
5' COLGALT1	0.8	0	1	1	0.0611	0.231889	1
3' KMT2C	0.571429	2.738	0.0612	0.67403	1	0.232169	1
5' SMC2	0.666667	1.252	0.0615	0.67403	1	0.233006	1
5' RAB21	0.5	0	1	1	0.0616	0.233285	1
5' FRMD4A	0.5	1.298	0.0618	0.67403	1	0.233842	1
5' ARFGAP2	0.666667	1.272	0.0621	0.67403	1	0.234676	1
5' BACH1	1	1.26	0.0622	0.67403	1	0.234954	1
5' BDH1	1	1.24	0.0624	0.67403	1	0.235509	1
5' ARL13B	1	1.266	0.0627	0.67403	1	0.236341	1
5' TAF8	0.5	1.26	0.0629	0.67403	1	0.236895	1
5' ACTR1A	0.5	1.25	0.0629	0.67403	1	0.236895	1
5' FAM83G	0.5	1.28	0.063	0.67403	1	0.237171	1
5' EDEM1	1	1.252	0.0631	0.67403	1	0.237447	1
5' LRP3	0.666667	1.24	0.0642	0.681339	1	0.240477	1
5' LRCH3	1	1.202	0.0643	0.681339	1	0.240752	1
5' SLK	1	1.262	0.0653	0.688255	1	0.243488	1
5' NFIC	0.625	1.928	0.0658	0.691685	1	0.244851	1
5' FOXP1	0.5	1.236	0.0661	0.693001	1	0.245666	1
5' ERC1	0.733333	0	1	1	0.0662	0.245938	1
5' ANKS1A	1	1.208	0.0675	0.699413	1	0.249455	1
3' CHD7	0.666667	1.437	0.0676	0.699413	1	0.249724	1
5' SCRIB	0.666667	2.776	0.0677	0.699413	1	0.249994	1
5' MYO19	1	1.222	0.0682	0.699413	1	0.251338	1
3' LPP	0.5	0.662	0.0683	0.699413	1	0.251607	1
3' CTTN	1	0	1	1	0.0683	0.251607	1
5' PTPN21	1	1.206	0.0692	0.706803	1	0.254016	1
5' SMARCE1	1	1.212	0.0698	0.710292	1	0.255616	1
5' NSF	1	1.216	0.0703	0.712529	1	0.256945	1
5' ATR	0.75	3.831	0.0709	0.716777	1	0.258536	1
5' CPSF6	0.5	0	1	1	0.071	0.2588	1
5' FGFR2	0.944444	0	1	1	0.072	0.261438	1
3' ZNF609	0.666667	0.652	0.0721	0.727054	1	0.261701	1
5' TBL1XR1	1	0.778	0.1802	1	0.4035	0.263305	1
3' THRA	1	0.65	0.0737	0.741302	1	0.265891	1
3' DIP2A	1	1.386	0.0743	0.743563	1	0.267454	1
3' TSHZ2	0.611111	0	1	1	0.075	0.26927	1
3' NPLOC4	0.666667	0.71	0.0754	0.750779	1	0.270305	1
5' RET	0.666667	0	1	1	0.0766	0.273398	1
3' ENOPH1	0.666667	0	1	1	0.0766	0.273398	1
3' MSR1	1	0	1	1	0.0767	0.273654	1
3' DNAJC7	0.666667	0.649	0.0769	0.761887	1	0.274168	1
3' TIPRL	0.666667	0	1	1	0.0771	0.27468	1
3' ADGRE3	1	0	1	1	0.0774	0.275449	1
5' SARS	1	0	1	1	0.0775	0.275704	1
3' ZSCAN4	0.666667	0	1	1	0.0777	0.276216	1
3' HCFC2	0.666667	0.645	0.0779	0.76987	1	0.276726	1
5' NCOA1	0.666667	0	1	1	0.078	0.276982	1
5' SPRR2G	1	0	1	1	0.0782	0.277492	1
5' ERO1B	1	0	1	1	0.0784	0.278001	1
3' SAMM50	1	0	1	1	0.0784	0.278001	1
5' ADIPOR2	0.666667	0	1	1	0.0787	0.278764	1
3' EFCAB3	0.5	0	1	1	0.0788	0.279018	1
5' DLG5	0.75	1.824	0.3591	1	0.2197	0.279258	1
3' REG4	0.666667	0	1	1	0.0789	0.279272	1
5' PRRG2	0.666667	0	1	1	0.079	0.279526	1
3' SLC28A3	0.666667	0	1	1	0.0791	0.27978	1
5' ZNF79	0.666667	0	1	1	0.0792	0.280034	1
3' ACTN3	0.666667	0	1	1	0.0792	0.280034	1
3' ELK3	0.666667	0	1	1	0.0792	0.280034	1
3' RHOD	0.5	0	1	1	0.0794	0.280541	1
3' FBXL20	0.5	0	1	1	0.0795	0.280794	1
3' PEMT	0.5	0	1	1	0.0795	0.280794	1
5' FAM169A	1	0	1	1	0.0796	0.281047	1
3' ATG5	1	0	1	1	0.0796	0.281047	1
3' HEATR1	0.666667	0	1	1	0.0796	0.281047	1
5' GPC6	1	0	1	1	0.0797	0.2813	1
3' KCMF1	1	0	1	1	0.0797	0.2813	1
3' MPC2	0.666667	0	1	1	0.0797	0.2813	1
3' TP73	1	0.643	0.0798	0.786685	1	0.281553	1
3' LYPLA1	1	0	1	1	0.0798	0.281553	1
5' ASB4	1	0	1	1	0.0799	0.281806	1
5' SLC30A4	0.666667	0	1	1	0.0799	0.281806	1
5' TMEM167A	0.666667	0	1	1	0.0799	0.281806	1
5' NUAK1	1	0	1	1	0.08	0.282058	1
5' BLNK	0.666667	0	1	1	0.0801	0.282311	1
3' TAF4B	0.666667	0	1	1	0.0801	0.282311	1
3' HSD17B14	0.5	0	1	1	0.0802	0.282563	1
3' STK33	1	0	1	1	0.0802	0.282563	1
3' TTC6	0.5	0	1	1	0.0802	0.282563	1
3' NF1	0.555556	3.085	0.0803	0.78965	1	0.282815	1
3' TADA2A	0.5	0	1	1	0.0804	0.283068	1
5' GOLGB1	1	0	1	1	0.0805	0.28332	1
5' ARHGEF1	0.666667	0	1	1	0.0806	0.283571	1
3' NAE1	1	0	1	1	0.0806	0.283571	1
3' NOTCH2	0.5	0	1	1	0.0809	0.284326	1
3' ARID3A	0.666667	0	1	1	0.081	0.284578	1
3' STIM1	1	0	1	1	0.081	0.284578	1
5' ARHGAP32	0.6	1.827	0.3599	1	0.2254	0.284883	1
3' SAFB2	1	0.646	0.0812	0.796524	1	0.28508	1
5' MAPKAP1	1	0	1	1	0.0812	0.28508	1
5' PDE4B	0.666667	0	1	1	0.0812	0.28508	1
5' TARS2	0.666667	0	1	1	0.0812	0.28508	1
3' POP4	1	0	1	1	0.0813	0.285331	1
5' AASS	1	0	1	1	0.0814	0.285582	1
5' ARHGEF25	1	0	1	1	0.0814	0.285582	1
5' REG1B	1	0	1	1	0.0814	0.285582	1
3' TNK2	1	0	1	1	0.0814	0.285582	1
3' TTC27	1	0	1	1	0.0814	0.285582	1
5' SIN3B	1	0	1	1	0.0815	0.285833	1
3' CLEC2B	0.666667	0	1	1	0.0815	0.285833	1
3' EGLN1	1	0	1	1	0.0815	0.285833	1
3' KSR1	1	0	1	1	0.0815	0.285833	1
3' TCTN1	1	0	1	1	0.0815	0.285833	1
3' TRIP4	0.666667	0.632	0.0817	0.79945	1	0.286334	1
5' PPARG	0.666667	0	1	1	0.0817	0.286334	1
3' COPB2	1	0	1	1	0.0817	0.286334	1
5' PLEKHB1	1	0	1	1	0.0818	0.286585	1
5' SLC34A2	1	0	1	1	0.0818	0.286585	1
3' MGMT	0.5	0	1	1	0.0818	0.286585	1
5' CS	0.666667	0	1	1	0.0819	0.286835	1
5' LIMK1	0.666667	0	1	1	0.0819	0.286835	1
5' TAB2	0.666667	0	1	1	0.0819	0.286835	1
3' PIK3C2G	0.666667	0	1	1	0.0819	0.286835	1
3' RGMB	1	0	1	1	0.0819	0.286835	1
5' NEDD1	0.666667	0	1	1	0.082	0.287085	1
5' NIT1	1	0	1	1	0.082	0.287085	1
5' PACRG	1	0	1	1	0.082	0.287085	1
3' EIF5	1	0	1	1	0.082	0.287085	1
5' ATM	1	0	1	1	0.0821	0.287335	1
3' NXN	1	0	1	1	0.0821	0.287335	1
3' USP28	1	0	1	1	0.0821	0.287335	1
5' OAF	1	0	1	1	0.0822	0.287585	1
5' ODF2	0.666667	0	1	1	0.0822	0.287585	1
3' AKR1D1	1	0	1	1	0.0822	0.287585	1
3' MYC	1	0	1	1	0.0822	0.287585	1
5' HDAC2	1	0	1	1	0.0823	0.287835	1
5' MIEF2	1	0	1	1	0.0823	0.287835	1
5' TSPAN9	0.666667	0	1	1	0.0823	0.287835	1
5' TTC27	0.666667	0	1	1	0.0823	0.287835	1
3' ANO10	0.666667	0	1	1	0.0823	0.287835	1
3' LMCD1	1	0	1	1	0.0823	0.287835	1
3' MYBPC1	0.5	0	1	1	0.0823	0.287835	1
3' RIOK1	0.666667	0	1	1	0.0823	0.287835	1
3' RMDN2	1	0	1	1	0.0823	0.287835	1
5' PODXL	0.666667	0	1	1	0.0824	0.288084	1
3' MAP7D2	1	0	1	1	0.0824	0.288084	1
5' TF	1	0	1	1	0.0825	0.288334	1
3' BRD4	0.666667	0	1	1	0.0825	0.288334	1
3' RPUSD2	1	0	1	1	0.0825	0.288334	1
5' RPL13	1	0	1	1	0.0826	0.288583	1
3' COX7B	1	0	1	1	0.0826	0.288583	1
3' PPIA	1	0	1	1	0.0826	0.288583	1
3' PRCC	1	0	1	1	0.0826	0.288583	1
5' GFOD1	1	0	1	1	0.0827	0.288833	1
5' CSN2	1	0	1	1	0.0828	0.289082	1
5' SNAPC5	1	0	1	1	0.0828	0.289082	1
3' CDH1	0.666667	0	1	1	0.0828	0.289082	1
3' MORC3	0.666667	0	1	1	0.0828	0.289082	1
3' TMEM120A	0.666667	0	1	1	0.0828	0.289082	1
3' C2orf78	0.666667	0	1	1	0.0829	0.289331	1
3' CAMK2G	0.5	0	1	1	0.0829	0.289331	1
5' MAPRE1	0.5	0	1	1	0.083	0.28958	1
5' RUNX2	0.666667	0	1	1	0.083	0.28958	1
5' SETD5	0.5	0	1	1	0.083	0.28958	1
5' SLC37A1	0.666667	0	1	1	0.083	0.28958	1
5' TMEM265	1	0	1	1	0.083	0.28958	1
3' CIB1	0.666667	0	1	1	0.0831	0.289829	1
3' TMEM207	0.5	0	1	1	0.0831	0.289829	1
3' FGA	1	0	1	1	0.0832	0.290077	1
5' MSRA	0.666667	0.742	0.0833	0.813098	1	0.290326	1
5' LRRC59	0.666667	0	1	1	0.0833	0.290326	1
3' ARID1B	1	0	1	1	0.0833	0.290326	1
3' COMMD6	0.666667	0	1	1	0.0833	0.290326	1
3' GHR	0.666667	0	1	1	0.0833	0.290326	1
3' HDDC2	1	0	1	1	0.0833	0.290326	1
3' METTL25	1	0	1	1	0.0833	0.290326	1
3' PTPN1	1	0	1	1	0.0833	0.290326	1
5' BCOR	1	0	1	1	0.0834	0.290575	1
5' CD99L2	1	0	1	1	0.0834	0.290575	1
5' CYFIP1	1	0	1	1	0.0834	0.290575	1
5' KITLG	0.666667	0	1	1	0.0834	0.290575	1
5' ZNF586	0.666667	0	1	1	0.0834	0.290575	1
5' RMDN1	1	0	1	1	0.0835	0.290823	1
3' PTGR2	1	0	1	1	0.0835	0.290823	1
3' RBPJ	0.666667	0	1	1	0.0835	0.290823	1
3' RSRC1	1	0	1	1	0.0835	0.290823	1
5' CACNA1G	1	0	1	1	0.0836	0.291071	1
5' DOK5	0.666667	0	1	1	0.0836	0.291071	1
5' EFHD1	1	0	1	1	0.0836	0.291071	1
3' THSD7B	0.5	0	1	1	0.0836	0.291071	1
3' IGSF23	0.5	0	1	1	0.0837	0.291319	1
5' ELK3	0.666667	0	1	1	0.0838	0.291567	1
3' CTTNBP2NL	0.666667	0	1	1	0.0838	0.291567	1
3' PLEKHA2	0.5	0	1	1	0.0838	0.291567	1
3' VPS33B	0.666667	0	1	1	0.0838	0.291567	1
5' OSBPL10	0.666667	0	1	1	0.0839	0.291815	1
5' UNC5B	0.666667	0	1	1	0.0839	0.291815	1
3' QKI	0.5	0	1	1	0.0839	0.291815	1
3' STK32C	1	0	1	1	0.0839	0.291815	1
3' TYK2	0.666667	0	1	1	0.0839	0.291815	1
3' UCKL1	0.666667	0	1	1	0.0839	0.291815	1
5' EFCAB2	1	0	1	1	0.084	0.292063	1
5' CSTA	1	0	1	1	0.0841	0.29231	1
3' KARS	1	0	1	1	0.0841	0.29231	1
5' CTNNBL1	0.666667	0	1	1	0.0842	0.292558	1
5' DHCR7	1	0	1	1	0.0843	0.292805	1
5' GRK2	0.5	0	1	1	0.0843	0.292805	1
3' DNAH3	1	0	1	1	0.0843	0.292805	1
3' PLCB4	1	0	1	1	0.0843	0.292805	1
3' RGS17	1	0	1	1	0.0843	0.292805	1
3' TCP11L2	0.666667	0	1	1	0.0843	0.292805	1
5' CAST	1	0	1	1	0.0844	0.293053	1
5' NCSTN	0.5	0	1	1	0.0844	0.293053	1
5' RPF2	1	0	1	1	0.0844	0.293053	1
3' ASCC2	0.666667	0	1	1	0.0844	0.293053	1
3' RNF169	0.666667	0	1	1	0.0844	0.293053	1
5' CEL	0.666667	0	1	1	0.0845	0.2933	1
5' ELK4	0.666667	0	1	1	0.0845	0.2933	1
3' OTUD7B	1	0	1	1	0.0845	0.2933	1
3' PSMB3	0.5	0	1	1	0.0845	0.2933	1
3' SLC2A8	0.666667	0	1	1	0.0845	0.2933	1
5' SYCP2	1	0	1	1	0.0846	0.293547	1
3' INA	0.666667	0	1	1	0.0846	0.293547	1
3' AMBP	1	0	1	1	0.0847	0.293794	1
3' COL24A1	1	0	1	1	0.0847	0.293794	1
3' TOR1AIP1	0.666667	0	1	1	0.0847	0.293794	1
5' ANKRD22	1	0	1	1	0.0848	0.294041	1
5' PCSK5	0.666667	0	1	1	0.0848	0.294041	1
3' COL4A2	1	0	1	1	0.0848	0.294041	1
3' PGD	1	0	1	1	0.0848	0.294041	1
3' PSMB7	0.666667	0	1	1	0.0848	0.294041	1
5' ANTXR2	1	0	1	1	0.0849	0.294287	1
5' CDKL2	1	0	1	1	0.0849	0.294287	1
3' GUSB	1	0	1	1	0.0849	0.294287	1
3' PLEKHF1	0.5	0	1	1	0.0849	0.294287	1
5' CYP2E1	1	0	1	1	0.085	0.294534	1
3' STRN	1	0	1	1	0.085	0.294534	1
3' RDH11	0.5	0	1	1	0.0851	0.29478	1
5' ACTR3B	1	0	1	1	0.0852	0.295027	1
5' BCL3	0.5	0	1	1	0.0852	0.295027	1
3' CCDC28B	0.5	0	1	1	0.0852	0.295027	1
3' TBC1D15	0.5	0	1	1	0.0852	0.295027	1
5' SYPL1	0.666667	0	1	1	0.0853	0.295273	1
3' GALNT13	1	0	1	1	0.0853	0.295273	1
3' TYROBP	0.666667	0	1	1	0.0853	0.295273	1
5' MCU	0.5	0	1	1	0.0855	0.295765	1
5' SIAH2	1	0	1	1	0.0855	0.295765	1
3' C20orf96	0.666667	0	1	1	0.0855	0.295765	1
3' PIK3AP1	1	0	1	1	0.0855	0.295765	1
5' F3	1	0	1	1	0.0856	0.296011	1
3' TMEM256	1	0	1	1	0.0856	0.296011	1
5' RAP2B	1	0	1	1	0.0857	0.296257	1
5' PRDX6	0.666667	0	1	1	0.0858	0.296502	1
5' PTPN13	0.666667	0	1	1	0.0858	0.296502	1
5' SEC24D	1	0	1	1	0.0858	0.296502	1
3' EIF4E2	1	0	1	1	0.0859	0.296748	1
3' ACAP2	1	0	1	1	0.086	0.296993	1
3' UBFD1	1	0	1	1	0.086	0.296993	1
5' FBXO32	0.666667	0	1	1	0.0861	0.297238	1
3' KCTD14	0.666667	0	1	1	0.0861	0.297238	1
5' FGB	1	0	1	1	0.0862	0.297484	1
3' CWF19L2	0.666667	0	1	1	0.0863	0.297729	1
5' PATJ	0.5	0	1	1	0.0864	0.297974	1
5' RPS6KB1	0.666667	0	1	1	0.0866	0.298463	1
3' CRTC1	0.666667	0	1	1	0.0866	0.298463	1
3' ZDHHC24	0.666667	0	1	1	0.0866	0.298463	1
3' CAPRIN1	0.666667	0	1	1	0.0867	0.298708	1
3' CCDC112	0.666667	0	1	1	0.0868	0.298952	1
3' PCDH15	0.5	0	1	1	0.0869	0.299196	1
3' VWA5A	1	0	1	1	0.0869	0.299196	1
5' IGFBP7	1	0	1	1	0.087	0.299441	1
5' XBP1	1	0	1	1	0.0872	0.299929	1
3' DHX30	1	0.627	0.0873	0.839733	1	0.300173	1
5' GXYLT2	1	0	1	1	0.0873	0.300173	1
5' PRSS2	0.666667	0	1	1	0.0873	0.300173	1
3' CCDC25	1	0	1	1	0.0875	0.30066	1
3' ABCA8	1	0	1	1	0.0876	0.300904	1
3' CRB3	1	0	1	1	0.0877	0.301147	1
3' MRPS21	1	0	1	1	0.0877	0.301147	1
5' MND1	1	0	1	1	0.0878	0.301391	1
5' PRPF6	0.666667	0	1	1	0.0878	0.301391	1
5' KCNAB2	1	0	1	1	0.0879	0.301634	1
5' SLC10A7	1	0	1	1	0.0879	0.301634	1
3' ABLIM1	1	0	1	1	0.088	0.301877	1
5' PKM	1	0	1	1	0.0881	0.30212	1
5' SGPL1	0.5	0	1	1	0.0881	0.30212	1
3' PPP2R1A	0.666667	0	1	1	0.0883	0.302605	1
3' UNC5D	0.625	0	1	1	0.0883	0.302605	1
5' PTDSS1	1	0.742	0.0887	0.851133	1	0.303575	1
5' NSA2	1	0	1	1	0.089	0.304302	1
5' RB1CC1	0.666667	0	1	1	0.089	0.304302	1
3' EVX1	0.666667	0	1	1	0.0891	0.304543	1
5' PC	0.666667	0	1	1	0.0895	0.30551	1
5' STARD3	0.555556	0	1	1	0.0895	0.30551	1
3' CELA3A	1	0	1	1	0.0896	0.305751	1
3' PPP2R5D	0.666667	0.627	0.09	0.861522	1	0.306715	1
3' NOL8	1	0	1	1	0.0903	0.307437	1
5' TBC1D9	0.5	0	1	1	0.0905	0.307918	1
5' TSTD1	1	0	1	1	0.0905	0.307918	1
5' E2F5	0.666667	0	1	1	0.0908	0.308638	1
5' COL16A1	0.5	2.75	0.091	0.866906	1	0.309118	1
5' AKR1C3	1	0	1	1	0.0913	0.309836	1
3' STAP1	0.5	0.621	0.0915	0.869579	1	0.310315	1
5' HOOK3	0.555556	0	1	1	0.0916	0.310554	1
3' IGFBP4	0.666667	0	1	1	0.0919	0.31127	1
3' COL7A1	0.5	1.332	0.092	0.872239	1	0.311509	1
5' GNA12	0.833333	0	1	1	0.0922	0.311986	1
5' ARHGEF17	1	2.808	0.2341	1	0.3961	0.313241	1
5' SND1	0.555556	0	1	1	0.0936	0.315313	1
3' ACER3	0.714286	0	1	1	0.0942	0.316732	1
3' SMC1B	1	0.625	0.0945	0.891675	1	0.31744	1
5' SLC12A2	1	0	1	1	0.0945	0.31744	1
5' EHBP1	0.833333	0	1	1	0.0951	0.318854	1
5' KHDRBS3	0.75	1.31	0.0957	0.898718	1	0.320264	1
3' AAMDC	0.625	0	1	1	0.0961	0.321201	1
3' EXOC4	0.833333	0	1	1	0.0969	0.323072	1
3' VARS	1	0.621	0.098	0.918142	1	0.325633	1
5' PHF3	0.75	1.37	0.4414	1	0.2226	0.326227	1
5' NF2	0.727273	0	1	1	0.099	0.327951	1
3' NEDD4L	0.714286	0.652	0.1763	1	0.5625	0.328341	1
3' ZFAT	0.8	0.678	0.0992	0.925943	1	0.328413	1
5' KIF16B	0.5	1.262	0.1	0.930282	1	0.330259	1
3' CCT2	0.625	0	1	1	0.1007	0.331868	1
3' GABRA5	1	0.613	0.1011	0.935785	1	0.332785	1
5' PACS1	0.8	0	1	1	0.1018	0.334387	1
3' GAK	0.666667	0.612	0.1056	0.973239	1	0.342999	1
5' MED23	0.75	1.256	0.1067	0.981095	1	0.345466	1
3' DYNC2H1	0.5	1.316	0.1091	1	1	0.35081	1
3' GLUD1	1	0.609	0.1094	1	1	0.351474	1
3' WRAP53	0.875	0	1	1	0.1095	0.351695	1
5' APPL1	1	0.708	0.1106	1	1	0.354123	1
5' KIF13A	1	2.704	0.2821	1	0.3955	0.356256	1
5' BAG4	1	0	1	1	0.1128	0.358945	1
5' TLK2	0.777778	0	1	1	0.113	0.359382	1
3' GPALPP1	1	0.603	0.1133	1	1	0.360035	1
5' MED24	0.538462	0	1	1	0.1137	0.360906	1
3' PPP4R1	0.5	0.603	0.1146	1	1	0.362859	1
5' NCOR1	0.5	1.324	0.7622	1	0.1505	0.363099	1
5' DTNB	0.666667	0.696	0.1166	1	1	0.367174	1
5' AURKA	1	0.702	0.1184	1	1	0.371028	1
5' KIAA0100	0.6	1.218	0.5113	1	0.2321	0.37161	1
5' RNF43	0.666667	0.697	0.1212	1	1	0.37697	1
5' LTBP3	1	0.702	0.1216	1	1	0.377813	1
5' ARID1B	0.7	0	1	1	0.1217	0.378024	1
5' ATXN2	1	0.786	0.1253	1	1	0.385554	1
5' PRPF3	1	0.687	0.1276	1	1	0.39031	1
3' SND1	0.636364	0	1	1	0.1294	0.394003	1
5' MSI2	0.52	0	1	1	0.1309	0.397062	1
3' MGA	1	1.233	0.132	1	1	0.399294	1
5' ME1	1	0.644	0.3347	1	0.3972	0.4012	1
5' PDE4D	0.555556	0.773	0.2401	1	0.5594	0.403955	1
3' COL27A1	0.666667	1.222	0.1349	1	1	0.405135	1
5' CAPRIN1	0.5	0.682	0.135	1	1	0.405335	1
5' EZR	0.833333	0	1	1	0.1369	0.409126	1
3' CCDC88C	0.5	1.228	0.1377	1	1	0.410715	1
3' HECW2	1	1.348	0.1384	1	1	0.412101	1
3' ATP11B	1	0	1	1	0.1397	0.414666	1
5' ECE1	0.833333	0	1	1	0.1402	0.415649	1
5' MTHFD1L	0.833333	0	1	1	0.1405	0.416238	1
5' LAMB1	1	0	1	1	0.1435	0.422094	1
5' LUC7L3	0.5	0	1	1	0.144	0.423064	1
3' CCDC6	0.833333	0	1	1	0.1444	0.423838	1
5' ITSN2	0.6	0.642	0.6415	1	0.2253	0.42409	1
5' ADAM10	0.833333	0	1	1	0.1446	0.424225	1
3' VMP1	0.625	0	1	1	0.145	0.424998	1
5' BRSK1	1	0.672	0.1457	1	1	0.426348	1
5' GLIS3	0.714286	0	1	1	0.1462	0.42731	1
5' MYO5A	1	0	1	1	0.1463	0.427503	1
3' CDKAL1	0.6	0	1	1	0.1464	0.427695	1
3' COL21A1	0.833333	0	1	1	0.1477	0.430187	1
3' ASCC3	0.571429	1.608	0.1483	1	1	0.431333	1
5' ZMYND8	0.714286	0	1	1	0.1492	0.433048	1
3' KIAA0391	0.833333	0	1	1	0.1494	0.433429	1
3' COL1A1	0.625	0	1	1	0.1497	0.433999	1
5' DPP3	1	0	1	1	0.15	0.434568	1
5' MIB1	0.5	0.671	0.1502	1	1	0.434947	1
3' THADA	0.625	0	1	1	0.1511	0.436651	1
3' COG4	0.857143	0	1	1	0.1521	0.438537	1
5' RPTOR	0.5	1.254	0.1529	1	1	0.440042	1
5' CPM	0.6	0	1	1	0.1534	0.44098	1
5' THSD4	0.75	0	1	1	0.1541	0.442291	1
3' SCAF11	1	0.608	0.1545	1	1	0.443038	1
5' SH3GL1	0.75	0	1	1	0.1571	0.447872	1
5' TCF12	0.5	0	1	1	0.1579	0.449351	1
5' SPECC1L	0.714286	0.713	0.2872	1	0.554	0.451577	1
5' DHX30	0.8	1.254	0.1593	1	1	0.451929	1
3' FRMD4B	0.571429	0.641	0.1619	1	1	0.456684	1
5' UVRAG	0.538462	0	1	1	0.1639	0.460313	1
5' CHD1	0.6	0.604	0.7183	1	0.2315	0.464612	1
5' IKBKB	0.5	0.66	0.17	1	1	0.471233	1
3' PTPRS	1	0.729	0.1723	1	1	0.475293	1
5' TBCD	0.75	0	1	1	0.1725	0.475644	1
5' PUM1	0.75	0	1	1	0.1729	0.476347	1
5' SAFB2	0.5	0.646	0.1769	1	1	0.483321	1
5' CDC73	0.666667	0.648	0.1793	1	1	0.487462	1
5' ANKFY1	1	0.645	0.1821	1	1	0.492253	1
5' TMEM248	1	0.645	0.1857	1	1	0.498349	1
3' OS9	0.666667	0	1	1	0.1895	0.504708	1
3' NRXN2	0.666667	0.683	0.1956	1	1	0.514757	1
5' STK3	0.727273	0	1	1	0.1981	0.518821	1
5' LAMA3	0.727273	0	1	1	0.203	0.526694	1
5' LPP	0.714286	0.662	0.3691	1	0.5652	0.53557	1
3' RPTOR	0.555556	0.627	0.2113	1	1	0.539761	1
5' TUBGCP3	1	0.63	0.2122	1	1	0.541158	1
3' SPTBN1	1	1.208	0.2153	1	1	0.545941	1
5' HSD17B12	1	0	1	1	0.2155	0.546248	1
5' HOOK2	0.5	0.626	0.2159	1	1	0.546862	1
3' SLC9A8	0.6	0	1	1	0.2159	0.546862	1
5' ZNF318	1	3.21	0.2166	1	1	0.547934	1
5' ADAMTS2	1	0	1	1	0.2168	0.54824	1
5' WWP1	0.6	0	1	1	0.2168	0.54824	1
3' SAP30	1	0	1	1	0.217	0.548545	1
5' GP2	1	0	1	1	0.2172	0.548851	1
5' RMND1	0.75	0	1	1	0.2174	0.549156	1
3' TLK2	0.75	0	1	1	0.2178	0.549766	1
3' DNAJC1	0.75	0	1	1	0.218	0.550071	1
3' C10orf90	1	0	1	1	0.2181	0.550223	1
5' NOTCH2	0.6	0	1	1	0.2183	0.550527	1
3' VANGL1	0.75	0	1	1	0.2185	0.550832	1
5' ALK	1	0	1	1	0.2187	0.551136	1
5' CHCHD6	0.6	0	1	1	0.2188	0.551288	1
3' DCAF7	0.75	0	1	1	0.219	0.551592	1
3' KATNAL2	0.75	0	1	1	0.219	0.551592	1
3' AKT3	0.666667	0	1	1	0.2194	0.552199	1
3' SPRR1B	1	0	1	1	0.2196	0.552502	1
5' STUB1	0.75	0	1	1	0.22	0.553108	1
5' GID4	1	0	1	1	0.2202	0.553411	1
5' DMD	1	0	1	1	0.2204	0.553713	1
3' HMGA2	0.75	0	1	1	0.2204	0.553713	1
3' DCAF6	0.75	0	1	1	0.2205	0.553865	1
3' PTEN	0.6	0	1	1	0.2205	0.553865	1
3' NAV1	0.75	0	1	1	0.2208	0.554318	1
3' CCDC88A	1	0	1	1	0.2209	0.554469	1
3' DAB1	1	0	1	1	0.2209	0.554469	1
3' HMGCS2	1	0	1	1	0.2209	0.554469	1
3' MUCL1	0.6	0	1	1	0.221	0.55462	1
3' SUPT5H	1	0	1	1	0.221	0.55462	1
3' TUFT1	1	0	1	1	0.221	0.55462	1
3' KIAA0319	1	0	1	1	0.2211	0.554771	1
3' ARHGAP23	0.5	0	1	1	0.2212	0.554922	1
3' NLGN1	0.5	0	1	1	0.2212	0.554922	1
3' TNC	0.75	0	1	1	0.2212	0.554922	1
5' ANXA2	1	0	1	1	0.2213	0.555073	1
5' R3HDM2	0.5	0	1	1	0.2214	0.555223	1
3' LRRC1	0.75	0	1	1	0.2214	0.555223	1
3' SFSWAP	0.75	0	1	1	0.2214	0.555223	1
3' F7	0.6	0	1	1	0.2215	0.555374	1
5' CDC37	1	0	1	1	0.2216	0.555525	1
3' MPZL1	0.75	0	1	1	0.2216	0.555525	1
3' ZNF462	1	0	1	1	0.2216	0.555525	1
3' USP15	0.6	0	1	1	0.2217	0.555676	1
3' SEZ6	1	0	1	1	0.2219	0.555977	1
5' AMD1	1	0	1	1	0.2221	0.556278	1
5' DDX52	0.6	0	1	1	0.2221	0.556278	1
3' CAP1	0.6	0	1	1	0.2222	0.556428	1
5' HNRNPUL1	0.857143	0	1	1	0.2223	0.556579	1
5' KLHL7	1	0	1	1	0.2223	0.556579	1
5' NOTCH1	0.5	0	1	1	0.2223	0.556579	1
5' UAP1	0.6	0	1	1	0.2224	0.556729	1
3' ARL3	0.5	0	1	1	0.2224	0.556729	1
3' PDE4D	0.75	0	1	1	0.2224	0.556729	1
3' SSH2	0.5	0	1	1	0.2224	0.556729	1
3' RAI1	1	0	1	1	0.2225	0.556879	1
5' KDM5A	0.857143	0	1	1	0.2226	0.55703	1
3' RGS6	0.5	0	1	1	0.2228	0.55733	1
5' STK38	0.75	0	1	1	0.223	0.55763	1
3' EPHB2	1	0	1	1	0.223	0.55763	1
3' CMPK1	1	0	1	1	0.2231	0.55778	1
3' BCAN	1	0	1	1	0.2233	0.55808	1
5' MVB12B	1	0	1	1	0.2234	0.55823	1
5' RICTOR	0.5	0	1	1	0.2234	0.55823	1
3' CRYL1	0.6	0	1	1	0.2234	0.55823	1
3' PPP1R37	1	0	1	1	0.2234	0.55823	1
3' CHRM3	1	0	1	1	0.2235	0.55838	1
3' P4HB	1	0	1	1	0.2235	0.55838	1
3' METTL4	0.6	0	1	1	0.2237	0.558679	1
5' FOXO3	1	0	1	1	0.2238	0.558829	1
5' COMMD10	1	0	1	1	0.224	0.559128	1
3' NUBPL	0.75	0	1	1	0.2241	0.559278	1
5' MICALL2	0.5	0	1	1	0.2242	0.559428	1
3' YAP1	0.545455	0	1	1	0.2242	0.559428	1
5' CTTN	0.5	0	1	1	0.2243	0.559577	1
5' LTBP1	1	0	1	1	0.2243	0.559577	1
5' RBM38	0.6	0	1	1	0.2244	0.559727	1
3' HOMER2	0.75	0	1	1	0.2245	0.559876	1
3' ASCC1	0.5	0	1	1	0.2246	0.560025	1
5' ALG8	0.6	0	1	1	0.2247	0.560175	1
3' THAP10	1	0	1	1	0.2247	0.560175	1
5' FAM53B	0.5	0	1	1	0.2248	0.560324	1
3' MYO9B	0.666667	0	1	1	0.2248	0.560324	1
3' OSBPL8	0.6	0	1	1	0.2248	0.560324	1
3' MAPKAP1	0.75	0	1	1	0.2249	0.560473	1
3' VPS50	0.6	0	1	1	0.2249	0.560473	1
5' SOCS7	0.5	0	1	1	0.225	0.560622	1
5' MARS	0.75	0	1	1	0.2251	0.560771	1
5' YBX3	0.5	0	1	1	0.2251	0.560771	1
3' CCNL2	1	0	1	1	0.2251	0.560771	1
3' KAT14	1	0	1	1	0.2251	0.560771	1
3' UBE3D	1	0	1	1	0.2251	0.560771	1
5' GOLGA4	0.6	0	1	1	0.2252	0.560921	1
3' LNP1	0.75	0	1	1	0.2252	0.560921	1
5' ARHGAP44	0.75	0	1	1	0.2253	0.56107	1
5' TNIP1	0.6	0	1	1	0.2253	0.56107	1
3' FNTA	0.75	0	1	1	0.2253	0.56107	1
3' SLC6A15	0.75	0	1	1	0.2253	0.56107	1
5' PRPF19	1	0	1	1	0.2254	0.561219	1
3' PCTP	0.75	0	1	1	0.2254	0.561219	1
5' WDR20	0.6	0	1	1	0.2255	0.561368	1
3' RCOR1	1	0	1	1	0.2255	0.561368	1
5' TBC1D10A	0.75	0	1	1	0.2256	0.561517	1
3' ABCC5	0.6	0	1	1	0.2256	0.561517	1
3' SLCO2B1	0.75	0	1	1	0.2256	0.561517	1
5' BCL2L13	0.75	0	1	1	0.2257	0.561665	1
5' DVL2	1	0	1	1	0.2257	0.561665	1
5' TRIT1	0.75	0	1	1	0.2257	0.561665	1
3' PDE4A	0.75	0	1	1	0.2259	0.561963	1
5' TCF3	0.6	0	1	1	0.226	0.562112	1
3' ABCC3	0.75	0	1	1	0.226	0.562112	1
3' SGCD	1	0	1	1	0.226	0.562112	1
5' PAWR	0.75	0	1	1	0.2261	0.56226	1
5' PLEKHH1	1	0	1	1	0.2261	0.56226	1
3' PREX1	0.6	0	1	1	0.2261	0.56226	1
5' CRYL1	0.6	0	1	1	0.2263	0.562558	1
5' RHOA	1	0	1	1	0.2263	0.562558	1
3' EHBP1	0.6	0	1	1	0.2263	0.562558	1
3' PFDN2	0.5	0	1	1	0.2264	0.562706	1
3' SPINT2	0.6	0	1	1	0.2264	0.562706	1
3' TTC39A	0.75	0	1	1	0.2264	0.562706	1
3' DNAH5	1	0	1	1	0.2265	0.562855	1
3' HIST1H2AC	0.6	0	1	1	0.2265	0.562855	1
3' MDM2	0.75	0	1	1	0.2265	0.562855	1
5' CASC4	0.75	0	1	1	0.2266	0.563003	1
5' FXR1	0.5	0	1	1	0.2266	0.563003	1
5' TIGAR	0.6	0	1	1	0.2266	0.563003	1
3' KCNIP3	1	0	1	1	0.2266	0.563003	1
3' LHFPL4	1	0	1	1	0.2266	0.563003	1
5' GPHN	0.5	0	1	1	0.2267	0.563152	1
5' MTDH	0.5	0	1	1	0.2268	0.5633	1
5' COBL	0.75	0	1	1	0.2269	0.563448	1
3' MIPEP	0.5	0	1	1	0.2269	0.563448	1
5' KCNQ5	0.6	0	1	1	0.227	0.563597	1
5' TRIM25	0.75	0	1	1	0.227	0.563597	1
3' F13A1	1	0	1	1	0.2271	0.563745	1
3' AKR1E2	1	0	1	1	0.2272	0.563893	1
3' RFTN2	0.75	0	1	1	0.2272	0.563893	1
3' ENPP2	0.75	0	1	1	0.2273	0.564041	1
5' FNBP1L	0.6	0	1	1	0.2274	0.56419	1
3' BICD1	1	0	1	1	0.2275	0.564338	1
3' ENG	1	0	1	1	0.2275	0.564338	1
3' GANC	1	0	1	1	0.2275	0.564338	1
5' ZNF20	1	0	1	1	0.2276	0.564486	1
3' CDH17	1	0	1	1	0.2276	0.564486	1
3' NCKAP5	0.75	0	1	1	0.2277	0.564634	1
5' MDM1	0.6	0	1	1	0.2278	0.564782	1
3' PPIL4	1	0	1	1	0.2278	0.564782	1
5' PRUNE1	0.75	0	1	1	0.2279	0.56493	1
5' RELN	0.75	0	1	1	0.2279	0.56493	1
3' ESR1	0.6	0	1	1	0.2279	0.56493	1
3' PKN2	1	0	1	1	0.2279	0.56493	1
3' ANKRD31	1	0	1	1	0.228	0.565077	1
3' RABGAP1L	0.5	0	1	1	0.228	0.565077	1
3' SYNE1	0.5	0	1	1	0.228	0.565077	1
3' NKAIN2	0.75	0	1	1	0.2281	0.565225	1
5' KIF3C	0.75	0	1	1	0.2282	0.565373	1
3' CHMP1A	0.5	0	1	1	0.2283	0.565521	1
5' TRIM24	0.75	0	1	1	0.2285	0.565816	1
5' SPAG5	0.6	0	1	1	0.2286	0.565964	1
5' SYNE1	0.75	0	1	1	0.2286	0.565964	1
5' BOC	1	0	1	1	0.2287	0.566111	1
5' SSBP3	1	0	1	1	0.2287	0.566111	1
3' DNAJC2	1	0	1	1	0.2287	0.566111	1
3' ST8SIA1	0.6	0	1	1	0.2287	0.566111	1
5' DDX17	0.75	0	1	1	0.2289	0.566406	1
5' SCN8A	0.75	0	1	1	0.2289	0.566406	1
5' SLIT3	0.5	0	1	1	0.2289	0.566406	1
5' ZNF91	1	0	1	1	0.2289	0.566406	1
3' DTX1	0.666667	0	1	1	0.229	0.566554	1
5' C19orf47	0.75	0	1	1	0.2291	0.566701	1
3' SPATS2	0.75	0	1	1	0.2293	0.566996	1
5' OXSR1	0.75	0	1	1	0.2295	0.56729	1
5' SAMD12	0.6	0	1	1	0.2295	0.56729	1
5' TDRD3	0.6	0	1	1	0.2298	0.567731	1
5' TMEM132D	1	0	1	1	0.2298	0.567731	1
5' UST	0.6	0	1	1	0.2299	0.567878	1
3' LLGL2	0.75	0	1	1	0.2302	0.568319	1
3' MSL1	0.6	0	1	1	0.2303	0.568466	1
3' DSCAM	0.6	0	1	1	0.2305	0.56876	1
3' NEGR1	0.75	0	1	1	0.2305	0.56876	1
5' PLXNA1	1	0	1	1	0.2307	0.569053	1
5' LMNA	0.6	0	1	1	0.2309	0.569346	1
3' PRKAR2A	0.75	0	1	1	0.2309	0.569346	1
5' HLCS	0.5	0	1	1	0.231	0.569493	1
3' KIAA1324	1	0	1	1	0.231	0.569493	1
5' AFF3	0.857143	0	1	1	0.2311	0.569639	1
5' TYMS	1	0	1	1	0.2312	0.569786	1
5' DNAJC17	0.75	0	1	1	0.2313	0.569932	1
5' STXBP4	0.75	0	1	1	0.2313	0.569932	1
3' PGM5	0.6	0	1	1	0.2313	0.569932	1
3' GREB1L	0.666667	0.656	0.2316	1	1	0.570371	1
5' GALNT2	0.5	0	1	1	0.2318	0.570664	1
5' EVPL	0.75	0	1	1	0.2319	0.57081	1
3' FBN1	1	0	1	1	0.2319	0.57081	1
3' AHCYL2	1	0	1	1	0.2323	0.571394	1
5' SMG1	0.625	2.632	0.415	1	0.5598	0.571419	1
5' PDCD6	0.75	0	1	1	0.2325	0.571686	1
3' IGFBP6	0.75	0	1	1	0.2333	0.572852	1
3' TDRD12	0.6	0	1	1	0.2335	0.573143	1
5' REV3L	0.5	2.45	0.2337	1	1	0.573434	1
5' CD44	0.5	0	1	1	0.2343	0.574305	1
5' MAN1A1	0.5	0	1	1	0.2344	0.57445	1
3' TYRP1	0.75	0	1	1	0.2348	0.57503	1
3' ZZEF1	1	0.801	0.2365	1	1	0.577487	1
5' IGF2R	0.5	1.506	0.2391	1	1	0.581222	1
3' NARS2	0.571429	0	1	1	0.2391	0.581222	1
5' DAB2IP	0.5	0.605	0.2395	1	1	0.581794	1
5' GNE	0.666667	0.617	0.2406	1	1	0.583363	1
5' RTN4	1	0.607	0.2413	1	1	0.58436	1
3' ANK2	1	0.637	0.245	1	1	0.589592	1
5' ADAMTS12	1	1.452	0.2485	1	1	0.59449	1
5' CDKN2A	0.777778	0	1	1	0.2485	0.59449	1
5' TET3	0.7	0	1	1	0.249	0.595185	1
3' ITSN2	1	0.642	0.2499	1	1	0.596435	1
3' MICU1	0.636364	0	1	1	0.2499	0.596435	1
5' PRCC	0.777778	0	1	1	0.251	0.597958	1
5' TSPAN31	1	0	1	1	0.2516	0.598787	1
5' ACTN4	0.636364	0	1	1	0.252	0.599338	1
5' CACNA1C	0.875	0	1	1	0.2543	0.602498	1
5' HNF1B	1	0.603	0.256	1	1	0.60482	1
5' DBT	1	0.602	0.2572	1	1	0.606452	1
5' ABR	0.538462	0	1	1	0.2592	0.60916	1
5' POLR1A	1	1.392	0.2696	1	1	0.622996	1
3' NUMA1	1	0.63	0.2712	1	1	0.625089	1
5' FAT1	0.6	2.034	0.278	1	1	0.633877	1
5' CREBBP	0.578947	4.92	0.4988	1	0.5922	0.655605	1
3' EYS	0.5	0	1	1	0.3052	0.667408	1
5' ADAMTS9	0.666667	1.37	0.3061	1	1	0.668474	1
5' NBEAL2	1	1.354	0.3113	1	1	0.674587	1
5' ANKRD12	0.666667	1.335	0.3113	1	1	0.674587	1
5' ABCA1	0.5	1.332	0.3126	1	1	0.676101	1
5' ACLY	0.75	0.622	0.3126	1	1	0.676101	1
5' TRIOBP	0.5	1.314	0.3189	1	1	0.683364	1
3' DNAH17	0.727273	1.983	0.3203	1	1	0.684961	1
5' XRN1	0.75	1.926	0.3265	1	1	0.69196	1
5' CHST11	1	0.647	0.3274	1	1	0.692966	1
5' ITPR1	1	1.294	0.333	1	1	0.699171	1
5' PRRC2A	1	1.905	0.3349	1	1	0.701255	1
5' APC	0.666667	1.282	0.3413	1	1	0.708195	1
5' ANK2	0.666667	1.274	0.3421	1	1	0.709054	1
5' EHBP1L1	0.666667	1.232	0.3453	1	1	0.712472	1
5' NUP205	0.5	1.222	0.3553	1	1	0.722962	1
5' KIAA1671	0.8	0	1	1	0.3618	0.729629	1
5' MPDZ	0.666667	1.216	0.3657	1	1	0.733573	1
5' LYST	0.5	1.218	0.3695	1	1	0.737376	1
3' IFT140	0.571429	0	1	1	0.3822	0.749804	1
3' IFT88	0.8	0	1	1	0.3842	0.751723	1
5' CEP295	0.666667	0.733	0.3847	1	1	0.752201	1
5' PIK3CB	0.571429	0	1	1	0.3855	0.752964	1
5' SMYD3	0.666667	0	1	1	0.3856	0.753059	1
5' DNAJC1	0.8	0	1	1	0.3857	0.753155	1
3' C12orf10	0.8	0	1	1	0.3865	0.753916	1
3' KCNMA1	0.666667	0	1	1	0.3874	0.75477	1
3' CLPB	0.571429	0	1	1	0.3877	0.755055	1
3' RANBP17	1	0	1	1	0.3881	0.755434	1
5' NUDCD1	1	0	1	1	0.3885	0.755812	1
5' COL1A2	1	0	1	1	0.3892	0.756473	1
5' RAB11FIP1	0.666667	0	1	1	0.3892	0.756473	1
3' SDCCAG8	0.5	0	1	1	0.3892	0.756473	1
3' TOX	0.8	0	1	1	0.3895	0.756756	1
5' NSMCE2	0.666667	0	1	1	0.3902	0.757416	1
5' PDLIM5	1	0	1	1	0.3908	0.75798	1
3' MLIP	0.666667	0	1	1	0.3908	0.75798	1
3' ANO2	1	0	1	1	0.3909	0.758074	1
3' CCND3	0.666667	0	1	1	0.3913	0.758449	1
5' IKZF3	0.8	0	1	1	0.3914	0.758543	1
5' RBL1	0.666667	0	1	1	0.3916	0.758731	1
5' RANGAP1	0.5	0	1	1	0.3917	0.758824	1
5' C6orf62	1	0	1	1	0.3918	0.758918	1
5' BCAT1	0.8	0	1	1	0.392	0.759105	1
5' MYH10	0.8	0	1	1	0.3927	0.75976	1
3' COMMD7	1	0	1	1	0.3928	0.759854	1
5' NEBL	0.5	0	1	1	0.3929	0.759947	1
5' TOM1L2	0.666667	0	1	1	0.3934	0.760414	1
3' FGD4	0.8	0	1	1	0.3934	0.760414	1
3' PAAF1	0.8	0	1	1	0.3937	0.760694	1
3' ANK1	0.666667	0	1	1	0.3939	0.76088	1
5' EEA1	0.666667	0	1	1	0.3941	0.761066	1
3' SLC9A3R1	1	0	1	1	0.3941	0.761066	1
5' RABEP1	0.5	0	1	1	0.3942	0.76116	1
3' TMEM99	1	0	1	1	0.3944	0.761346	1
3' CA3	1	0	1	1	0.3945	0.761439	1
3' QRSL1	0.8	0	1	1	0.3945	0.761439	1
3' DNAJC5B	1	0	1	1	0.3946	0.761532	1
5' PRIM2	1	0	1	1	0.3949	0.761811	1
3' PLPP4	0.571429	0	1	1	0.395	0.761903	1
5' MAML2	0.8	0	1	1	0.3952	0.762089	1
3' GNAS	0.5	0	1	1	0.3952	0.762089	1
3' NCR3	0.8	0	1	1	0.3952	0.762089	1
5' BICD1	0.571429	0	1	1	0.3953	0.762182	1
5' THOC5	0.666667	0	1	1	0.3953	0.762182	1
3' TRPM1	1	0	1	1	0.3953	0.762182	1
5' ARHGEF7	0.666667	0	1	1	0.3954	0.762275	1
3' ALG14	0.8	0	1	1	0.3958	0.762646	1
5' MTCH2	0.8	0	1	1	0.396	0.762831	1
3' DAND5	0.571429	0	1	1	0.396	0.762831	1
3' MED15	0.8	0	1	1	0.3961	0.762924	1
5' TBC1D14	0.571429	0	1	1	0.3963	0.763109	1
5' ULK1	0.8	0	1	1	0.3963	0.763109	1
3' DRC3	0.8	0	1	1	0.3964	0.763201	1
5' DIAPH2	0.8	0	1	1	0.3967	0.763479	1
5' TMEM241	0.8	0	1	1	0.3968	0.763571	1
3' SP2	0.571429	0	1	1	0.397	0.763756	1
3' ABR	0.666667	0	1	1	0.3971	0.763849	1
3' SF3A3	0.8	0	1	1	0.3971	0.763849	1
3' ARHGAP6	1	0	1	1	0.3973	0.764033	1
3' TBC1D30	0.571429	0	1	1	0.3974	0.764125	1
5' DNM1L	0.666667	0	1	1	0.3975	0.764218	1
3' SDC3	0.8	0	1	1	0.3976	0.76431	1
5' CLU	0.666667	0	1	1	0.3977	0.764402	1
5' LANCL2	0.571429	0	1	1	0.398	0.764679	1
5' COG5	0.571429	0	1	1	0.3981	0.764771	1
3' CDH18	0.571429	0	1	1	0.3981	0.764771	1
3' ELOF1	0.666667	0	1	1	0.3981	0.764771	1
3' MYO5A	0.8	0	1	1	0.3981	0.764771	1
3' NTRK2	1	0	1	1	0.3982	0.764863	1
3' ANXA13	0.666667	0	1	1	0.3983	0.764955	1
5' ARHGAP5	0.571429	0	1	1	0.3984	0.765047	1
3' CLEC16A	0.8	0	1	1	0.3984	0.765047	1
5' B3GLCT	0.666667	0	1	1	0.3985	0.765139	1
5' SCYL1	0.8	0.619	0.3988	1	1	0.765415	1
3' BICC1	1	0	1	1	0.3988	0.765415	1
5' PSMD3	0.666667	0	1	1	0.3992	0.765782	1
5' SENP3	0.8	0	1	1	0.3997	0.766241	1
3' SPATA16	0.8	0	1	1	0.4	0.766516	1
5' TRAPPC10	0.666667	0	1	1	0.4002	0.7667	1
5' PRCP	1	0	1	1	0.4004	0.766883	1
3' L2HGDH	0.8	0	1	1	0.4004	0.766883	1
3' BCAM	1	0	1	1	0.401	0.767431	1
5' CLASRP	0.666667	0	1	1	0.4016	0.767979	1
5' ANKLE2	0.571429	0	1	1	0.4022	0.768526	1
5' TM9SF2	0.8	0	1	1	0.4027	0.768981	1
5' CEP70	1	0	1	1	0.4032	0.769436	1
5' ZC3H15	0.8	0	1	1	0.4032	0.769436	1
5' GRB7	0.571429	0	1	1	0.4056	0.771609	1
5' ADCY2	0.8	0	1	1	0.4073	0.773139	1
5' MED15	0.666667	0	1	1	0.4081	0.773857	1
3' PPP1R1B	0.647059	0	1	1	0.4142	0.779279	1
3' PACS1	0.7	0	1	1	0.4221	0.786167	1
3' ZBTB46	0.875	0	1	1	0.4255	0.789086	1
5' PARD3	0.785714	0	1	1	0.4284	0.791554	1
5' SMURF1	0.538462	0	1	1	0.4294	0.7924	1
5' RNF213	0.5	0	1	1	0.4296	0.792569	1
5' NECTIN2	0.636364	0	1	1	0.4301	0.792992	1
5' NUP214	0.75	1.32	0.4514	1	1	0.810444	1
5' AKAP6	0.666667	0.649	0.4815	1	1	0.833404	1
5' FAF1	0.636364	0.62	0.5915	1	0.8203	0.836099	1
5' CCDC88C	1	1.228	0.5144	1	1	0.85635	1
5' MON2	1	1.202	0.5191	1	1	0.859452	1
5' NCOA6	0.8	1.388	0.5399	1	1	0.872679	1
5' ROCK1	0.666667	0	1	1	0.5473	0.87719	1
3' ABCG1	0.833333	0	1	1	0.5512	0.879526	1
5' KDM6A	0.5	0	1	1	0.5524	0.88024	1
3' AGBL4	0.714286	0	1	1	0.5551	0.881836	1
5' NSD1	0.9	2.492	0.7688	1	0.7224	0.882001	1
3' GPR37L1	0.714286	0	1	1	0.5555	0.882071	1
3' LINGO2	0.625	0	1	1	0.5555	0.882071	1
3' EXD3	0.555556	0	1	1	0.556	0.882365	1
3' PC	0.833333	0	1	1	0.5564	0.882599	1
5' CLIC4	0.833333	0	1	1	0.557	0.882951	1
3' EFCAB6	0.625	0	1	1	0.5571	0.883009	1
5' RNF217	0.714286	0	1	1	0.5576	0.883302	1
5' RBFOX2	0.555556	0	1	1	0.5578	0.883418	1
5' ERGIC1	0.714286	0	1	1	0.5579	0.883477	1
3' TANGO6	0.833333	0	1	1	0.558	0.883535	1
5' NPEPPS	0.714286	0	1	1	0.5586	0.883885	1
5' SMARCC1	0.555556	0	1	1	0.5589	0.884059	1
3' PLXDC1	0.555556	0	1	1	0.5593	0.884292	1
5' ATP1A1	0.833333	0	1	1	0.5603	0.884872	1
5' ABI2	0.714286	0	1	1	0.5604	0.88493	1
3' HDAC5	0.714286	0	1	1	0.5604	0.88493	1
3' YWHAE	0.625	0	1	1	0.5605	0.884988	1
3' MET	0.625	0	1	1	0.5611	0.885335	1
5' F11R	0.714286	0	1	1	0.5616	0.885624	1
3' DYNC1I1	1	0	1	1	0.5618	0.885739	1
5' UBE2K	0.714286	0	1	1	0.562	0.885854	1
5' DIS3L2	0.833333	0	1	1	0.5623	0.886027	1
5' MAP3K5	0.714286	0	1	1	0.5626	0.8862	1
5' ROCK2	0.625	0	1	1	0.5628	0.886315	1
5' PABPC1	1	0	1	1	0.563	0.88643	1
3' SSBP3	0.833333	0	1	1	0.563	0.88643	1
3' SLC16A14	1	0	1	1	0.5632	0.886545	1
5' XXYLT1	0.833333	0	1	1	0.5643	0.887175	1
5' SERINC5	0.833333	0	1	1	0.5647	0.887404	1
5' KCNMA1	0.714286	0	1	1	0.5648	0.887461	1
3' PDZRN4	0.833333	0	1	1	0.5649	0.887518	1
5' SLC38A10	0.5	0	1	1	0.5655	0.88786	1
5' SEC23B	1	0	1	1	0.5656	0.887917	1
3' MATN2	0.555556	0	1	1	0.5656	0.887917	1
3' FTO	0.714286	0	1	1	0.5657	0.887974	1
5' WBP1L	0.555556	0	1	1	0.5658	0.888031	1
3' L3MBTL4	0.714286	0	1	1	0.5661	0.888202	1
3' SPEF2	0.625	0	1	1	0.5667	0.888543	1
5' ETNK1	1	0	1	1	0.5672	0.888827	1
5' ACOT7	0.5	0	1	1	0.5691	0.889901	1
3' CCT3	0.714286	0	1	1	0.5695	0.890127	1
3' SLC25A21	0.625	0	1	1	0.5711	0.891025	1
5' PGAP3	0.5	0	1	1	0.5712	0.891081	1
5' SNX30	0.833333	0	1	1	0.5719	0.891473	1
5' PIGU	0.555556	0	1	1	0.5782	0.894958	1
5' KIF13B	0.615385	0	1	1	0.5785	0.895123	1
3' NINJ2	1	0	1	1	0.5825	0.897298	1
5' HECTD4	0.615385	0	1	1	0.5873	0.899873	1
5' RASSF3	0.6	0	1	1	0.6263	0.919362	1
5' EHMT1	1	0	1	1	0.6277	0.920015	1
3' MGST2	0.75	0	1	1	0.6288	0.920527	1
3' MACROD2	0.5	0	1	1	0.6295	0.920851	1
5' MACROD1	0.545455	0	1	1	0.63	0.921082	1
5' XPR1	0.545455	0	1	1	0.63	0.921082	1
5' HTT	0.714286	1.4	0.6304	1	1	0.921267	1
5' DOCK1	0.666667	0	1	1	0.631	0.921544	1
5' TFB2M	1	0	1	1	0.6315	0.921774	1
5' SARNP	0.75	0	1	1	0.6323	0.922141	1
5' UQCC1	0.545455	0	1	1	0.6328	0.92237	1
3' EYA2	0.857143	0	1	1	0.6334	0.922644	1
5' FOCAD	0.6	0	1	1	0.6339	0.922872	1
3' DIAPH3	0.857143	0	1	1	0.634	0.922918	1
3' CDK14	0.666667	0	1	1	0.6344	0.9231	1
5' MYO18A	0.857143	0	1	1	0.6346	0.923191	1
5' CRK	0.75	0	1	1	0.6348	0.923282	1
5' ARHGAP42	1	0	1	1	0.6355	0.9236	1
3' FHIT	0.666667	0	1	1	0.6357	0.92369	1
5' CLTC	0.666667	0	1	1	0.6385	0.924953	1
5' PRKDC	0.545455	0	1	1	0.6391	0.925221	1
3' WWOX	0.666667	0	1	1	0.6401	0.925668	1
5' WNK2	0.6	0	1	1	0.6431	0.927	1
5' ATP11B	0.666667	0	1	1	0.6448	0.927748	1
5' ZNRF3	0.642857	0	1	1	0.7234	0.957632	1
3' RAB11FIP4	0.538462	0	1	1	0.8131	0.981331	1
5' TBC1D22A	0.583333	0	1	1	0.8169	0.982109	1
5' SMARCA4	0.5	0	1	1	0.8177	0.98227	1
5' GRB2	0.636364	0	1	1	0.8187	0.982471	1
5' OLFM2	0.875	0	1	1	0.8203	0.982789	1
5' REPS2	0.777778	0	1	1	0.8207	0.982868	1
5' PRKAG2	0.875	0	1	1	0.8223	0.983183	1
5' DLG1	0.666667	0	1	1	0.8299	0.984635	1
5' TRIP12	0.666667	0	1	1	0.8885	0.993539	1
5' CUX1	0.8	0	1	1	0.8952	0.994306	1
5' WNK1	0.615385	0	1	1	0.899	0.994719	1
3' SMYD3	0.692308	0	1	1	0.9015	0.994981	1
5' CASC3	0.727273	0	1	1	0.9019	0.995023	1
5' AARS	0.5	0	1	1	1	1	1
5' AASDHPPT	1	0	1	1	1	1	1
5' AATF	0.571429	0	1	1	1	1	1
5' ABCC2	1	0	1	1	1	1	1
5' ABCC5	0.5	0	1	1	1	1	1
5' ABCF1	1	0	1	1	1	1	1
5' ABCG1	0.5	0	1	1	1	1	1
5' ABHD16A	1	0	1	1	1	1	1
5' ACSF2	1	0	1	1	1	1	1
5' ACSS1	0.666667	0	1	1	1	1	1
5' ACTG1	1	0	1	1	1	1	1
5' ACTR2	1	0	1	1	1	1	1
5' ACTR3	0.666667	0	1	1	1	1	1
5' ADAMTS17	0.5	0	1	1	1	1	1
5' ADAP1	0.666667	0	1	1	1	1	1
5' ADCK2	1	0	1	1	1	1	1
5' ADCY3	1	0	1	1	1	1	1
5' ADGRL3	0.5	0	1	1	1	1	1
5' ADI1	1	0	1	1	1	1	1
5' ADNP	1	0	1	1	1	1	1
5' AFAP1	1	0	1	1	1	1	1
5' AFDN	0.6	0	1	1	1	1	1
5' AFF4	0.666667	0	1	1	1	1	1
5' AGAP2	1	0	1	1	1	1	1
5' AGRN	0.5	0	1	1	1	1	1
5' AHI1	0.666667	0	1	1	1	1	1
5' AIG1	0.666667	0	1	1	1	1	1
5' AIP	0.666667	0	1	1	1	1	1
5' AJUBA	1	0	1	1	1	1	1
5' AK3	0.666667	0	1	1	1	1	1
5' AK4	1	0	1	1	1	1	1
5' AKAP10	1	0	1	1	1	1	1
5' ALDH2	0.666667	0	1	1	1	1	1
5' ALDH3A2	0.75	0	1	1	1	1	1
5' ALDOA	0.666667	0	1	1	1	1	1
5' ALG14	0.75	0	1	1	1	1	1
5' ALG6	1	0	1	1	1	1	1
5' ALX4	1	0	1	1	1	1	1
5' AMFR	0.666667	0	1	1	1	1	1
5' AMOTL1	0.666667	0	1	1	1	1	1
5' ANK1	0.666667	0	1	1	1	1	1
5' ANKRD28	0.5	0	1	1	1	1	1
5' ANKRD33B	1	0	1	1	1	1	1
5' ANKRD42	1	0	1	1	1	1	1
5' ANKRD52	0.5	0	1	1	1	1	1
5' ANLN	0.5	0	1	1	1	1	1
5' ANO2	1	0	1	1	1	1	1
5' ANXA4	1	0	1	1	1	1	1
5' AP1M1	0.5	0	1	1	1	1	1
5' AP1M2	0.666667	0	1	1	1	1	1
5' AP2B1	0.666667	0	1	1	1	1	1
5' AP3B1	0.75	0	1	1	1	1	1
5' AP3D1	0.6	0	1	1	1	1	1
5' APAF1	0.666667	0	1	1	1	1	1
5' APIP	1	0	1	1	1	1	1
5' APOLD1	1	0	1	1	1	1	1
5' ARFGEF1	1	0	1	1	1	1	1
5' ARFGEF3	0.75	0	1	1	1	1	1
5' ARHGAP10	1	0	1	1	1	1	1
5' ARHGAP21	0.666667	0	1	1	1	1	1
5' ARHGEF18	0.5	0	1	1	1	1	1
5' ARHGEF2	1	0	1	1	1	1	1
5' ARID3A	0.8	0	1	1	1	1	1
5' ARID5B	1	0	1	1	1	1	1
5' ARL16	1	0	1	1	1	1	1
5' ARL8B	1	0	1	1	1	1	1
5' ARMC1	0.5	0	1	1	1	1	1
5' ARPP19	1	0	1	1	1	1	1
5' ASH2L	0.5	0	1	1	1	1	1
5' ATAD5	0.5	0	1	1	1	1	1
5' ATE1	0.666667	0	1	1	1	1	1
5' ATF3	1	0	1	1	1	1	1
5' ATF6	0.555556	0	1	1	1	1	1
5' ATF7IP	0.5	0	1	1	1	1	1
5' ATG2A	0.75	0	1	1	1	1	1
5' ATG4C	1	0	1	1	1	1	1
5' ATP1B1	0.5	0	1	1	1	1	1
5' ATP2A2	1	0	1	1	1	1	1
5' ATP2A3	1	0	1	1	1	1	1
5' ATP2C1	0.5	0	1	1	1	1	1
5' ATP6AP1	1	0	1	1	1	1	1
5' ATP8A2	1	0	1	1	1	1	1
5' ATP8B4	0.5	0	1	1	1	1	1
5' ATRN	0.666667	0	1	1	1	1	1
5' ATXN10	0.625	0	1	1	1	1	1
5' AXIN2	1	0	1	1	1	1	1
5' AXL	1	0	1	1	1	1	1
5' BAX	0.75	0	1	1	1	1	1
5' BBX	1	0	1	1	1	1	1
5' BCAM	0.666667	0	1	1	1	1	1
5' BCAR3	1	0	1	1	1	1	1
5' BCKDHB	1	0	1	1	1	1	1
5' BCL2L1	1	0	1	1	1	1	1
5' BCL2L11	1	0	1	1	1	1	1
5' BCL7A	1	0	1	1	1	1	1
5' BMP2K	0.5	0	1	1	1	1	1
5' BPIFB1	1	0	1	1	1	1	1
5' BRD9	0.6	0	1	1	1	1	1
5' BRMS1L	1	0	1	1	1	1	1
5' BTBD1	0.6	0	1	1	1	1	1
5' BTRC	0.666667	0	1	1	1	1	1
5' C12orf45	0.666667	0	1	1	1	1	1
5' C16orf70	0.714286	0	1	1	1	1	1
5' C19orf25	1	0	1	1	1	1	1
5' C22orf39	0.5	0	1	1	1	1	1
5' C2CD2	0.5	0	1	1	1	1	1
5' C3	0.6	0	1	1	1	1	1
5' C9orf3	0.714286	0	1	1	1	1	1
5' CAAP1	1	0	1	1	1	1	1
5' CACHD1	0.666667	0	1	1	1	1	1
5' CACNA1D	0.666667	0	1	1	1	1	1
5' CACUL1	1	0	1	1	1	1	1
5' CADPS2	0.75	0	1	1	1	1	1
5' CALCB	0.666667	0	1	1	1	1	1
5' CALM3	1	0	1	1	1	1	1
5' CAMK2D	0.6	0	1	1	1	1	1
5' CAMSAP1	0.75	0	1	1	1	1	1
5' CAP1	1	0	1	1	1	1	1
5' CAPN1	0.666667	0	1	1	1	1	1
5' CAPN5	1	0	1	1	1	1	1
5' CAPS2	0.666667	0	1	1	1	1	1
5' CAPZA2	1	0	1	1	1	1	1
5' CASP8	1	0	1	1	1	1	1
5' CBR4	1	0	1	1	1	1	1
5' CBX5	0.5	0	1	1	1	1	1
5' CCDC127	1	0	1	1	1	1	1
5' CCDC149	0.666667	0	1	1	1	1	1
5' CCDC61	0.666667	0	1	1	1	1	1
5' CCDC91	0.625	0	1	1	1	1	1
5' CD63	1	0	1	1	1	1	1
5' CD83	1	0	1	1	1	1	1
5' CDC25A	1	0	1	1	1	1	1
5' CDC42BPA	0.6	0	1	1	1	1	1
5' CDC42BPB	0.8	0	1	1	1	1	1
5' CDCA7L	1	0	1	1	1	1	1
5' CDH3	1	0	1	1	1	1	1
5' CDK14	0.6	0	1	1	1	1	1
5' CDK5RAP1	0.666667	0	1	1	1	1	1
5' CDK5RAP2	1	0	1	1	1	1	1
5' CDK7	0.666667	0	1	1	1	1	1
5' CECR2	0.666667	0	1	1	1	1	1
5' CEMIP	0.75	0	1	1	1	1	1
5' CEP135	1	0	1	1	1	1	1
5' CEP170	1	0	1	1	1	1	1
5' CEP85L	0.666667	0	1	1	1	1	1
5' CERK	1	0	1	1	1	1	1
5' CFH	1	0	1	1	1	1	1
5' CHCHD1	1	0	1	1	1	1	1
5' CHMP5	0.666667	0	1	1	1	1	1
5' CHP1	0.5	0	1	1	1	1	1
5' CHSY3	1	0	1	1	1	1	1
5' CIC	0.666667	0	1	1	1	1	1
5' CIT	0.666667	0	1	1	1	1	1
5' CLASP2	1	0	1	1	1	1	1
5' CLCF1	1	0	1	1	1	1	1
5' CLOCK	0.666667	0	1	1	1	1	1
5' CLPTM1L	0.666667	0	1	1	1	1	1
5' CLPX	1	0	1	1	1	1	1
5' CLTA	0.5	0	1	1	1	1	1
5' CMTM8	0.5	0	1	1	1	1	1
5' CNN2	0.666667	0	1	1	1	1	1
5' CNOT9	0.5	0	1	1	1	1	1
5' COL6A2	0.666667	0	1	1	1	1	1
5' COMMD7	0.666667	0	1	1	1	1	1
5' COPE	1	0	1	1	1	1	1
5' COPS2	1	0	1	1	1	1	1
5' COPS7A	0.5	0	1	1	1	1	1
5' CORO1C	0.666667	0	1	1	1	1	1
5' CPAMD8	0.6	0	1	1	1	1	1
5' CPQ	1	0	1	1	1	1	1
5' CRLS1	0.5	0	1	1	1	1	1
5' CRTC1	1	0	1	1	1	1	1
5' CRYBG3	0.75	0	1	1	1	1	1
5' CSGALNACT2	1	0	1	1	1	1	1
5' CSNK1D	0.5	0	1	1	1	1	1
5' CSNK1E	0.5	0	1	1	1	1	1
5' CTDSPL	0.666667	0	1	1	1	1	1
5' CTNNA1	0.5	0	1	1	1	1	1
5' CTPS1	1	0	1	1	1	1	1
5' CUL3	0.666667	0	1	1	1	1	1
5' CUL4A	0.625	0	1	1	1	1	1
5' CUL5	0.666667	0	1	1	1	1	1
5' CXADR	0.5	0	1	1	1	1	1
5' CYP20A1	1	0	1	1	1	1	1
5' CYTH3	0.571429	0	1	1	1	1	1
5' DAAM1	1	0	1	1	1	1	1
5' DAP3	0.666667	0	1	1	1	1	1
5' DAPK1	1	0	1	1	1	1	1
5' DCAF5	0.5	0	1	1	1	1	1
5' DCBLD1	0.666667	0	1	1	1	1	1
5' DCP2	0.5	0	1	1	1	1	1
5' DCUN1D4	0.5	0	1	1	1	1	1
5' DDA1	0.5	0	1	1	1	1	1
5' DDB1	1	0	1	1	1	1	1
5' DDI2	0.5	0	1	1	1	1	1
5' DDR1	1	0	1	1	1	1	1
5' DDX10	0.666667	0	1	1	1	1	1
5' DDX19B	1	0	1	1	1	1	1
5' DDX58	1	0	1	1	1	1	1
5' DDX6	1	0	1	1	1	1	1
5' DERA	0.5	0	1	1	1	1	1
5' DHCR24	1	0	1	1	1	1	1
5' DHRS12	1	0	1	1	1	1	1
5' DHRSX	1	0	1	1	1	1	1
5' DHX15	0.666667	0	1	1	1	1	1
5' DHX34	0.666667	0	1	1	1	1	1
5' DHX40	0.5	0	1	1	1	1	1
5' DHX9	0.666667	0	1	1	1	1	1
5' DIXDC1	0.75	0	1	1	1	1	1
5' DLGAP4	0.5	0	1	1	1	1	1
5' DMXL1	1	0	1	1	1	1	1
5' DNAJC4	0.666667	0	1	1	1	1	1
5' DNAJC8	1	0	1	1	1	1	1
5' DNMT3A	0.666667	0	1	1	1	1	1
5' DNMT3B	0.666667	0	1	1	1	1	1
5' DOCK9	0.5	0	1	1	1	1	1
5' DPEP1	1	0	1	1	1	1	1
5' DPH6	0.666667	0	1	1	1	1	1
5' DPM1	0.6	0	1	1	1	1	1
5' DPP4	1	0	1	1	1	1	1
5' DPP8	1	0	1	1	1	1	1
5' DPY19L1	0.666667	0	1	1	1	1	1
5' DPY19L3	1	0	1	1	1	1	1
5' DSG1	1	0	1	1	1	1	1
5' DST	0.555556	0	1	1	1	1	1
5' DTD1	0.6	0	1	1	1	1	1
5' DTWD2	1	0	1	1	1	1	1
5' DUSP12	1	0	1	1	1	1	1
5' DUSP22	1	0	1	1	1	1	1
5' DYNC1H1	0.666667	0	1	1	1	1	1
5' DYNC1I1	1	0	1	1	1	1	1
5' DYNLRB1	1	0	1	1	1	1	1
5' DZANK1	0.666667	0	1	1	1	1	1
5' E2F3	0.5	0	1	1	1	1	1
5' EARS2	1	0	1	1	1	1	1
5' ECSIT	0.666667	0	1	1	1	1	1
5' EDA	1	0	1	1	1	1	1
5' EEF1A2	1	0	1	1	1	1	1
5' EFNA3	0.5	0	1	1	1	1	1
5' EFR3B	1	0	1	1	1	1	1
5' EFTUD2	0.5	0	1	1	1	1	1
5' EHD1	0.5	0	1	1	1	1	1
5' EIF2B3	0.5	0	1	1	1	1	1
5' EIF3B	0.75	0	1	1	1	1	1
5' EIF3L	0.666667	0	1	1	1	1	1
5' EIF3M	1	0	1	1	1	1	1
5' ELAVL1	1	0	1	1	1	1	1
5' ELMO2	1	0	1	1	1	1	1
5' ELP3	0.666667	0	1	1	1	1	1
5' EML3	0.666667	0	1	1	1	1	1
5' EMP2	0.75	0	1	1	1	1	1
5' ENAH	0.666667	0	1	1	1	1	1
5' ENSA	1	0	1	1	1	1	1
5' ENTPD5	0.5	0	1	1	1	1	1
5' EPHA2	1	0	1	1	1	1	1
5' EPS15L1	0.555556	0	1	1	1	1	1
5' ERBB3	0.75	0	1	1	1	1	1
5' ERCC6L2	0.5	0	1	1	1	1	1
5' ERI3	0.666667	0	1	1	1	1	1
5' ERICH1	0.666667	0	1	1	1	1	1
5' ERLEC1	0.666667	0	1	1	1	1	1
5' ESCO1	0.5	0	1	1	1	1	1
5' ETFA	1	0	1	1	1	1	1
5' ETHE1	0.666667	0	1	1	1	1	1
5' EVC	1	0	1	1	1	1	1
5' EVI5L	1	0	1	1	1	1	1
5' EXT2	0.666667	0	1	1	1	1	1
5' EYA2	0.6	0	1	1	1	1	1
5' FA2H	1	0	1	1	1	1	1
5' FAM104A	0.5	0	1	1	1	1	1
5' FAM114A1	0.666667	0	1	1	1	1	1
5' FAM114A2	1	0	1	1	1	1	1
5' FAM135A	0.666667	0	1	1	1	1	1
5' FAM13C	0.75	0	1	1	1	1	1
5' FAM160B1	0.666667	0	1	1	1	1	1
5' FAM172A	0.666667	0	1	1	1	1	1
5' FAM177A1	0.75	0	1	1	1	1	1
5' FAM98C	0.666667	0	1	1	1	1	1
5' FANCI	1	0	1	1	1	1	1
5' FAR2	1	0	1	1	1	1	1
5' FARS2	0.75	0	1	1	1	1	1
5' FBXL17	1	0	1	1	1	1	1
5' FBXL18	0.5	0	1	1	1	1	1
5' FBXO31	0.666667	0	1	1	1	1	1
5' FBXW11	0.5	0	1	1	1	1	1
5' FBXW8	1	0	1	1	1	1	1
5' FDFT1	0.571429	0	1	1	1	1	1
5' FGF12	0.5	0	1	1	1	1	1
5' FHOD3	0.571429	0	1	1	1	1	1
5' FIP1L1	0.75	0	1	1	1	1	1
5' FNBP4	0.75	0	1	1	1	1	1
5' FNIP2	0.666667	0	1	1	1	1	1
5' FNTB	0.666667	0	1	1	1	1	1
5' FOSL2	1	0	1	1	1	1	1
5' FOXJ3	0.6	0	1	1	1	1	1
5' FOXN3	0.666667	0	1	1	1	1	1
5' FOXP4	1	0	1	1	1	1	1
5' FREM2	1	0	1	1	1	1	1
5' FUT10	0.5	0	1	1	1	1	1
5' FXR2	1	0	1	1	1	1	1
5' FYTTD1	0.8	0	1	1	1	1	1
5' GABRP	0.75	0	1	1	1	1	1
5' GAPDH	0.666667	0	1	1	1	1	1
5' GAS7	0.5	0	1	1	1	1	1
5' GBE1	1	0	1	1	1	1	1
5' GCN1	0.666667	0	1	1	1	1	1
5' GDE1	1	0	1	1	1	1	1
5' GDI2	0.666667	0	1	1	1	1	1
5' GFM1	0.666667	0	1	1	1	1	1
5' GGA2	1	0	1	1	1	1	1
5' GINM1	1	0	1	1	1	1	1
5' GLB1	0.666667	0	1	1	1	1	1
5' GLOD4	1	0	1	1	1	1	1
5' GMDS	0.75	0	1	1	1	1	1
5' GMEB2	1	0	1	1	1	1	1
5' GNA11	1	0	1	1	1	1	1
5' GNB1	0.75	0	1	1	1	1	1
5' GNPAT	0.666667	0	1	1	1	1	1
5' GNS	0.5	0	1	1	1	1	1
5' GOLGA5	0.666667	0	1	1	1	1	1
5' GOLPH3	0.666667	0	1	1	1	1	1
5' GOLPH3L	0.666667	0	1	1	1	1	1
5' GORASP2	0.75	0	1	1	1	1	1
5' GOSR1	0.8	0	1	1	1	1	1
5' GPAT3	0.666667	0	1	1	1	1	1
5' GPC3	1	0	1	1	1	1	1
5' GPD1L	1	0	1	1	1	1	1
5' GPI	1	0	1	1	1	1	1
5' GPLD1	0.666667	0	1	1	1	1	1
5' GPR158	1	0	1	1	1	1	1
5' GPR89B	0.666667	0	1	1	1	1	1
5' GRID1	0.75	0	1	1	1	1	1
5' GRTP1	0.5	0	1	1	1	1	1
5' GSAP	0.666667	0	1	1	1	1	1
5' GTF2IRD1	0.5	0	1	1	1	1	1
5' GTPBP2	0.666667	0	1	1	1	1	1
5' GXYLT1	1	0	1	1	1	1	1
5' HACD3	1	0	1	1	1	1	1
5' HADH	1	0	1	1	1	1	1
5' HARBI1	1	0	1	1	1	1	1
5' HAUS8	0.6	0	1	1	1	1	1
5' HDAC7	1	0	1	1	1	1	1
5' HERC4	0.666667	0	1	1	1	1	1
5' HGD	1	0	1	1	1	1	1
5' HGSNAT	0.666667	0	1	1	1	1	1
5' HID1	1	0	1	1	1	1	1
5' HIST1H2AC	0.6	0	1	1	1	1	1
5' HM13	0.666667	0	1	1	1	1	1
5' HMGCS1	1	0	1	1	1	1	1
5' HNRNPA2B1	0.75	0	1	1	1	1	1
5' HNRNPR	1	0	1	1	1	1	1
5' HNRNPUL2	1	0	1	1	1	1	1
5' HOOK1	1	0	1	1	1	1	1
5' HPS4	1	0	1	1	1	1	1
5' HSPG2	0.8	0	1	1	1	1	1
5' IFFO2	1	0	1	1	1	1	1
5' IFT74	0.75	0	1	1	1	1	1
5' IFT81	0.75	0	1	1	1	1	1
5' IGF2BP3	1	0	1	1	1	1	1
5' IGHMBP2	0.5	0	1	1	1	1	1
5' IL12RB2	0.666667	0	1	1	1	1	1
5' IL13RA1	1	0	1	1	1	1	1
5' IL1RAP	0.666667	0	1	1	1	1	1
5' ILF3	0.5	0	1	1	1	1	1
5' ILVBL	1	0	1	1	1	1	1
5' INO80	1	0	1	1	1	1	1
5' INPP5B	0.75	0	1	1	1	1	1
5' INPP5F	1	0	1	1	1	1	1
5' INTS1	1	0	1	1	1	1	1
5' INTS11	0.5	0	1	1	1	1	1
5' IPO11	1	0	1	1	1	1	1
5' IPPK	0.666667	0	1	1	1	1	1
5' IQCH	1	0	1	1	1	1	1
5' IRAK2	0.5	0	1	1	1	1	1
5' ITGA6	1	0	1	1	1	1	1
5' ITGA9	0.833333	0	1	1	1	1	1
5' ITGB5	0.6	0	1	1	1	1	1
5' JADE2	1	0	1	1	1	1	1
5' JAK2	0.666667	0	1	1	1	1	1
5' JDP2	0.666667	0	1	1	1	1	1
5' KANSL3	0.666667	0	1	1	1	1	1
5' KCNK5	1	0	1	1	1	1	1
5' KCNN3	0.666667	0	1	1	1	1	1
5' KCNQ1	0.571429	0	1	1	1	1	1
5' KDM4B	0.666667	0	1	1	1	1	1
5' KDM5B	0.8	0	1	1	1	1	1
5' KIAA0930	1	0	1	1	1	1	1
5' KIDINS220	0.666667	0	1	1	1	1	1
5' KIF26B	1	0	1	1	1	1	1
5' KIF3B	0.75	0	1	1	1	1	1
5' KLF6	1	0	1	1	1	1	1
5' KLF7	0.666667	0	1	1	1	1	1
5' KLHL18	1	0	1	1	1	1	1
5' KLHL24	0.666667	0	1	1	1	1	1
5' KLHL26	0.666667	0	1	1	1	1	1
5' KNTC1	0.666667	0	1	1	1	1	1
5' KPNA1	1	0	1	1	1	1	1
5' KREMEN1	0.5	0	1	1	1	1	1
5' KRI1	1	0	1	1	1	1	1
5' L3MBTL2	1	0	1	1	1	1	1
5' L3MBTL4	1	0	1	1	1	1	1
5' LAMA2	0.5	0	1	1	1	1	1
5' LAMC2	0.75	0	1	1	1	1	1
5' LARP1B	1	0	1	1	1	1	1
5' LARS2	0.666667	0	1	1	1	1	1
5' LASP1	1	0	1	1	1	1	1
5' LDAH	1	0	1	1	1	1	1
5' LDLRAD3	0.8	0	1	1	1	1	1
5' LGR6	0.666667	0	1	1	1	1	1
5' LIMCH1	0.666667	0	1	1	1	1	1
5' LIMK2	1	0	1	1	1	1	1
5' LIN52	0.666667	0	1	1	1	1	1
5' LMAN2	0.571429	0	1	1	1	1	1
5' LMAN2L	0.75	0	1	1	1	1	1
5' LMBRD1	1	0	1	1	1	1	1
5' LNX1	0.5	0	1	1	1	1	1
5' LONP1	0.5	0	1	1	1	1	1
5' LONP2	0.5	0	1	1	1	1	1
5' LPCAT2	1	0	1	1	1	1	1
5' LPCAT4	1	0	1	1	1	1	1
5' LRP2	1	0	1	1	1	1	1
5' LRP6	0.5	0	1	1	1	1	1
5' LSM12	1	0	1	1	1	1	1
5' LSM4	0.5	0	1	1	1	1	1
5' LTA4H	0.666667	0	1	1	1	1	1
5' LYPLA1	1	0	1	1	1	1	1
5' MACF1	0.75	0	1	1	1	1	1
5' MAD1L1	0.666667	0	1	1	1	1	1
5' MAL2	0.75	0	1	1	1	1	1
5' MAN2B1	0.666667	0	1	1	1	1	1
5' MAP2K4	0.5	0	1	1	1	1	1
5' MAP2K5	0.75	0	1	1	1	1	1
5' MAP3K3	0.5	0	1	1	1	1	1
5' MAP4	0.571429	0	1	1	1	1	1
5' MAP4K3	0.5	0	1	1	1	1	1
5' MARCH6	0.75	0	1	1	1	1	1
5' MARCH9	0.5	0	1	1	1	1	1
5' MARVELD2	1	0	1	1	1	1	1
5' MAX	0.666667	0	1	1	1	1	1
5' MBD3	0.666667	0	1	1	1	1	1
5' MBNL1	1	0	1	1	1	1	1
5' MBOAT1	0.666667	0	1	1	1	1	1
5' MBOAT2	0.5	0	1	1	1	1	1
5' MBTD1	1	0	1	1	1	1	1
5' MBTPS1	1	0	1	1	1	1	1
5' MCL1	0.666667	0	1	1	1	1	1
5' MCM6	1	0	1	1	1	1	1
5' MED16	1	0	1	1	1	1	1
5' MED25	0.5	0	1	1	1	1	1
5' MED29	1	0	1	1	1	1	1
5' MEIS2	0.75	0	1	1	1	1	1
5' MELK	1	0	1	1	1	1	1
5' MET	0.6	0	1	1	1	1	1
5' METTL16	0.5	0	1	1	1	1	1
5' MFSD2A	1	0	1	1	1	1	1
5' MFSD6	0.6	0	1	1	1	1	1
5' MGMT	1	0	1	1	1	1	1
5' MGST1	1	0	1	1	1	1	1
5' MICU1	0.5	0	1	1	1	1	1
5' MIGA1	1	0	1	1	1	1	1
5' MINOS1	0.666667	0	1	1	1	1	1
5' MKNK2	0.5	0	1	1	1	1	1
5' MMP15	0.666667	0	1	1	1	1	1
5' MOK	0.5	0	1	1	1	1	1
5' MPHOSPH9	0.6	0	1	1	1	1	1
5' MRPL42	1	0	1	1	1	1	1
5' MRPS35	0.714286	0	1	1	1	1	1
5' MTA2	0.666667	0	1	1	1	1	1
5' MTAP	0.8	0	1	1	1	1	1
5' MTF1	0.5	0	1	1	1	1	1
5' MTFR1	1	0	1	1	1	1	1
5' MTG1	1	0	1	1	1	1	1
5' MTRR	1	0	1	1	1	1	1
5' MTUS1	0.5	0	1	1	1	1	1
5' MUC1	1	0	1	1	1	1	1
5' MYH11	1	0	1	1	1	1	1
5' MYO6	0.666667	0	1	1	1	1	1
5' MYO9B	0.5	0	1	1	1	1	1
5' NAA35	1	0	1	1	1	1	1
5' NAP1L4	1	0	1	1	1	1	1
5' NAPG	1	0	1	1	1	1	1
5' NARF	0.666667	0	1	1	1	1	1
5' NAV1	0.666667	0	1	1	1	1	1
5' NAV2	0.5	0	1	1	1	1	1
5' NBEAL1	0.75	0	1	1	1	1	1
5' NBPF26	0.5	0	1	1	1	1	1
5' NCEH1	0.666667	0	1	1	1	1	1
5' NCKAP1	1	0	1	1	1	1	1
5' NCOR2	0.625	0	1	1	1	1	1
5' NDC1	1	0	1	1	1	1	1
5' NEK7	1	0	1	1	1	1	1
5' NELFB	1	0	1	1	1	1	1
5' NEMF	0.6	0	1	1	1	1	1
5' NFE2L3	0.666667	0	1	1	1	1	1
5' NFIA	0.5	0	1	1	1	1	1
5' NFIB	0.5	0	1	1	1	1	1
5' NFKBIE	1	0	1	1	1	1	1
5' NFRKB	0.666667	0	1	1	1	1	1
5' NFYA	1	0	1	1	1	1	1
5' NHSL1	0.5	0	1	1	1	1	1
5' NKAIN3	1	0	1	1	1	1	1
5' NLN	1	0	1	1	1	1	1
5' NME7	1	0	1	1	1	1	1
5' NMNAT3	1	0	1	1	1	1	1
5' NOL12	0.666667	0	1	1	1	1	1
5' NOL9	0.75	0	1	1	1	1	1
5' NOMO1	1	0	1	1	1	1	1
5' NOMO3	0.666667	0	1	1	1	1	1
5' NOTCH3	1	0	1	1	1	1	1
5' NPAS2	0.666667	0	1	1	1	1	1
5' NPC2	1	0	1	1	1	1	1
5' NPHP4	1	0	1	1	1	1	1
5' NPM1	1	0	1	1	1	1	1
5' NPTN	0.666667	0	1	1	1	1	1
5' NPTXR	0.75	0	1	1	1	1	1
5' NRBF2	0.666667	0	1	1	1	1	1
5' NSD2	0.6	0	1	1	1	1	1
5' NSL1	1	0	1	1	1	1	1
5' NSRP1	0.5	0	1	1	1	1	1
5' NUAK2	0.5	0	1	1	1	1	1
5' NUBPL	1	0	1	1	1	1	1
5' NUF2	1	0	1	1	1	1	1
5' NUP188	0.75	0	1	1	1	1	1
5' NUP85	0.6	0	1	1	1	1	1
5' NXN	0.666667	0	1	1	1	1	1
5' OBSCN	0.6	0	1	1	1	1	1
5' OGT	0.666667	0	1	1	1	1	1
5' OLA1	0.5	0	1	1	1	1	1
5' OPA3	0.666667	0	1	1	1	1	1
5' OSBPL5	0.5	0	1	1	1	1	1
5' OSGIN2	0.666667	0	1	1	1	1	1
5' OXCT1	0.666667	0	1	1	1	1	1
5' P3H4	1	0	1	1	1	1	1
5' P4HA1	0.5	0	1	1	1	1	1
5' PACS2	0.666667	0	1	1	1	1	1
5' PAIP1	1	0	1	1	1	1	1
5' PAK2	0.666667	0	1	1	1	1	1
5' PAN3	0.571429	0	1	1	1	1	1
5' PAPPA2	0.666667	0	1	1	1	1	1
5' PAPSS2	0.5	0	1	1	1	1	1
5' PARN	1	0	1	1	1	1	1
5' PARVA	1	0	1	1	1	1	1
5' PBRM1	0.5	0	1	1	1	1	1
5' PCGF3	0.666667	0	1	1	1	1	1
5' PCLO	1	0	1	1	1	1	1
5' PCMT1	1	0	1	1	1	1	1
5' PCMTD2	0.8	0	1	1	1	1	1
5' PCNT	0.5	0	1	1	1	1	1
5' PCNX1	0.5	0	1	1	1	1	1
5' PCNX2	0.5	0	1	1	1	1	1
5' PCNX3	0.666667	0	1	1	1	1	1
5' PCTP	0.666667	0	1	1	1	1	1
5' PDCD2L	1	0	1	1	1	1	1
5' PDCD6IP	1	0	1	1	1	1	1
5' PDE9A	0.75	0	1	1	1	1	1
5' PDGFB	1	0	1	1	1	1	1
5' PDIA5	0.5	0	1	1	1	1	1
5' PDXK	0.666667	0	1	1	1	1	1
5' PELP1	0.5	0	1	1	1	1	1
5' PERP	1	0	1	1	1	1	1
5' PEX1	0.666667	0	1	1	1	1	1
5' PGPEP1	0.666667	0	1	1	1	1	1
5' PHKB	0.666667	0	1	1	1	1	1
5' PI4K2A	1	0	1	1	1	1	1
5' PIGS	0.666667	0	1	1	1	1	1
5' PIK3C2G	1	0	1	1	1	1	1
5' PIK3R1	0.666667	0	1	1	1	1	1
5' PITPNA	0.75	0	1	1	1	1	1
5' PKN1	0.5	0	1	1	1	1	1
5' PLA2G6	0.5	0	1	1	1	1	1
5' PLCB4	1	0	1	1	1	1	1
5' PLEKHA1	1	0	1	1	1	1	1
5' PLEKHA2	0.666667	0	1	1	1	1	1
5' PLEKHG5	0.666667	0	1	1	1	1	1
5' PLEKHH2	1	0	1	1	1	1	1
5' PLEKHM2	0.5	0	1	1	1	1	1
5' PLEKHO2	1	0	1	1	1	1	1
5' PLXNA3	1	0	1	1	1	1	1
5' PLXNB2	0.666667	0	1	1	1	1	1
5' PLXNC1	0.666667	0	1	1	1	1	1
5' PMPCB	1	0	1	1	1	1	1
5' PMVK	0.666667	0	1	1	1	1	1
5' PNPLA7	0.75	0	1	1	1	1	1
5' POC1A	1	0	1	1	1	1	1
5' POLA1	0.5	0	1	1	1	1	1
5' POLB	1	0	1	1	1	1	1
5' POLD3	0.5	0	1	1	1	1	1
5' POLH	0.666667	0	1	1	1	1	1
5' POLR2A	0.666667	0	1	1	1	1	1
5' POLR2B	1	0	1	1	1	1	1
5' POLR2F	0.666667	0	1	1	1	1	1
5' POLR3H	1	0	1	1	1	1	1
5' POLR3K	1	0	1	1	1	1	1
5' POMK	0.6	0	1	1	1	1	1
5' PPA2	0.666667	0	1	1	1	1	1
5' PPCDC	1	0	1	1	1	1	1
5' PPFIBP1	1	0	1	1	1	1	1
5' PPHLN1	1	0	1	1	1	1	1
5' PPIG	1	0	1	1	1	1	1
5' PPIL2	1	0	1	1	1	1	1
5' PPM1D	0.5	0	1	1	1	1	1
5' PPP1R21	0.666667	0	1	1	1	1	1
5' PPP1R9A	0.75	0	1	1	1	1	1
5' PPP2CA	0.6	0	1	1	1	1	1
5' PPP2R1A	0.75	0	1	1	1	1	1
5' PPP2R3C	1	0	1	1	1	1	1
5' PPP2R5C	0.666667	0	1	1	1	1	1
5' PPP3CB	0.666667	0	1	1	1	1	1
5' PPP3R1	0.5	0	1	1	1	1	1
5' PPP4R3B	1	0	1	1	1	1	1
5' PPP5C	0.75	0	1	1	1	1	1
5' PPP6R2	0.5	0	1	1	1	1	1
5' PPP6R3	0.6	0	1	1	1	1	1
5' PPTC7	0.6	0	1	1	1	1	1
5' PREX1	1	0	1	1	1	1	1
5' PRKD2	0.833333	0	1	1	1	1	1
5' PRMT1	0.666667	0	1	1	1	1	1
5' PRMT2	0.75	0	1	1	1	1	1
5' PRR14L	1	0	1	1	1	1	1
5' PRRG4	0.5	0	1	1	1	1	1
5' PRTG	1	0	1	1	1	1	1
5' PSD3	0.5	0	1	1	1	1	1
5' PSKH1	0.666667	0	1	1	1	1	1
5' PSMB2	1	0	1	1	1	1	1
5' PSMB7	1	0	1	1	1	1	1
5' PSMD1	0.625	0	1	1	1	1	1
5' PSMD12	0.666667	0	1	1	1	1	1
5' PSMD8	0.75	0	1	1	1	1	1
5' PSPC1	1	0	1	1	1	1	1
5' PTCH1	0.666667	0	1	1	1	1	1
5' PTK2	0.5	0	1	1	1	1	1
5' PTOV1	1	0	1	1	1	1	1
5' PTPA	1	0	1	1	1	1	1
5' PTPRU	0.5	0	1	1	1	1	1
5' PUM2	0.5	0	1	1	1	1	1
5' PUS1	0.666667	0	1	1	1	1	1
5' PVR	0.75	0	1	1	1	1	1
5' PWP2	1	0	1	1	1	1	1
5' PXK	0.5	0	1	1	1	1	1
5' QKI	0.666667	0	1	1	1	1	1
5' QRICH1	0.75	0	1	1	1	1	1
5' QRSL1	1	0	1	1	1	1	1
5' R3HCC1	1	0	1	1	1	1	1
5' RAB11FIP3	0.666667	0	1	1	1	1	1
5' RAB18	0.666667	0	1	1	1	1	1
5' RAB1A	0.666667	0	1	1	1	1	1
5' RAB33B	1	0	1	1	1	1	1
5' RAB3GAP1	0.666667	0	1	1	1	1	1
5' RABGAP1	0.5	0	1	1	1	1	1
5' RABGAP1L	1	0	1	1	1	1	1
5' RAD17	1	0	1	1	1	1	1
5' RAD50	1	0	1	1	1	1	1
5' RAD51AP1	0.666667	0	1	1	1	1	1
5' RAE1	1	0	1	1	1	1	1
5' RAI1	0.75	0	1	1	1	1	1
5' RALGAPA2	0.6	0	1	1	1	1	1
5' RALY	0.666667	0	1	1	1	1	1
5' RARS2	1	0	1	1	1	1	1
5' RASA1	0.8	0	1	1	1	1	1
5' RASAL2	0.571429	0	1	1	1	1	1
5' RBBP4	1	0	1	1	1	1	1
5' RBBP8	0.666667	0	1	1	1	1	1
5' RBCK1	0.5	0	1	1	1	1	1
5' RBM28	0.666667	0	1	1	1	1	1
5' RBM39	0.5	0	1	1	1	1	1
5' RBMS2	0.5	0	1	1	1	1	1
5' RBPMS	1	0	1	1	1	1	1
5' RCC1L	1	0	1	1	1	1	1
5' RCOR1	0.6	0	1	1	1	1	1
5' RECQL5	0.75	0	1	1	1	1	1
5' REL	0.6	0	1	1	1	1	1
5' RELB	1	0	1	1	1	1	1
5' REV1	0.666667	0	1	1	1	1	1
5' RFC1	0.75	0	1	1	1	1	1
5' RFTN1	0.5	0	1	1	1	1	1
5' RFX3	0.5	0	1	1	1	1	1
5' RGS12	0.666667	0	1	1	1	1	1
5' RNF122	0.666667	0	1	1	1	1	1
5' RNF13	1	0	1	1	1	1	1
5' RNF139	1	0	1	1	1	1	1
5' RNF144B	0.75	0	1	1	1	1	1
5' RNF169	0.5	0	1	1	1	1	1
5' RNF216	0.8	0	1	1	1	1	1
5' RNF24	1	0	1	1	1	1	1
5' RNF4	0.666667	0	1	1	1	1	1
5' RNF41	1	0	1	1	1	1	1
5' RNFT1	1	0	1	1	1	1	1
5' RNPEP	0.666667	0	1	1	1	1	1
5' RPAIN	0.666667	0	1	1	1	1	1
5' RPL22	0.666667	0	1	1	1	1	1
[truncated: 1,413 more rows]

## Sheet: B. Internal degron loss (OG)
gene	fraction of inframe fusions	degron loss score (domain retained)	p-value (degron)	q-value (degron)
5' ERBB2	0.555556	9.888	0.0001	0.00483333
5' MLLT10	0.5	4.17	0.0001	0.00483333
3' RET	0.948718	24.192	0.0001	0.00483333
3' ABL1	0.833333	3.19	0.0003	0.010875
5' IGF1R	0.714286	3.975	0.0004	0.0116
3' ETV1	1	2.316	0.0015	0.03625
5' PDGFRA	1	2.127	0.0033	0.0683571
3' ETV5	0.5	0.823	0.0071	0.128688
3' ETV4	0.857143	1.496	0.0099	0.1595
3' UBR5	0.666667	3.22	0.0223	0.316364
3' VAV1	0.666667	0.625	0.0831	1
5' RPTOR	0.5	1.254	0.0928	1
3' RPTOR	0.555556	0.627	0.1894	1
5' ALK	1	0	1	1
5' AXL	1	0	1	1
5' BCR	0.545455	0	1	1
5' BRAF	0.818182	0	1	1
5' CHD4	0.666667	0	1	1
5' DMD	1	0	1	1
5' EGFR	0.772727	0	1	1
5' FGFR2	0.944444	0	1	1
5' FGFR3	0.810811	0	1	1
5' GNA11	1	0	1	1
5' GNB1	0.75	0	1	1
5' KDM5A	0.857143	0	1	1
5' LRP6	0.5	0	1	1
5' MET	0.6	0	1	1
5' MSI2	0.52	0	1	1
5' NTRK3	0.8	0	1	1
5' NUF2	1	0	1	1
5' PAX8	0.888889	0	1	1
5' PDGFB	1	0	1	1
5' PIK3CB	0.571429	0	1	1
5' PPARG	0.666667	0	1	1
5' PPM1D	0.5	0	1	1
5' RAF1	0.866667	0	1	1
5' REL	0.6	0	1	1
5' RET	0.666667	0	1	1
5' SF1	0.571429	0	1	1
5' SMYD3	0.666667	0	1	1
5' SOS1	0.666667	0	1	1
5' SS18	0.785714	0	1	1
5' STAT3	0.5	0	1	1
5' STAT5B	1	0	1	1
5' USP8	0.75	0	1	1
5' VAV2	0.666667	0	1	1
5' XBP1	1	0	1	1
3' AKT3	0.75	0	1	1
3' ALK	0.866667	0	1	1
3' AR	0.666667	0	1	1
3' BRAF	0.863636	0	1	1
3' BRD4	0.666667	0	1	1
3' CCND3	0.666667	0	1	1
3' CD274	1	0	1	1
3' CDK6	0.5	0	1	1
3' CHD4	0.5	0	1	1
3' CTLA4	1	0	1	1
3' CUL1	0.666667	0	1	1
3' DMD	0.75	0	1	1
3' ERG	0.705882	0	1	1
3' ESR1	0.6	0	1	1
3' FGF3	0.666667	0	1	1
3' FGF4	1	0	1	1
3' GAB2	0.5	0	1	1
3' GNA12	0.666667	0	1	1
3' GNAS	0.5	0	1	1
3' HDAC7	0.666667	0	1	1
3' INSR	0.625	0	1	1
3' MAP3K13	0.714286	0	1	1
3' MDM2	0.75	0	1	1
3' MET	0.625	0	1	1
3' MSI2	0.5625	0	1	1
3' MYC	1	0	1	1
3' NFE2	0.5	0	1	1
3' NTRK1	1	0	1	1
3' NTRK2	1	0	1	1
3' NTRK3	0.875	0	1	1
3' NUP98	1	0	1	1
3' PPARG	0.6	0	1	1
3' PRKACA	0.875	0	1	1
3' RAC2	0.666667	0	1	1
3' RAF1	0.888889	0	1	1
3' ROS1	1	0	1	1
3' RRAS2	1	0	1	1
3' RUNX1T1	0.8	0	1	1
3' SMYD3	0.692308	0	1	1
3' TFE3	0.933333	0	1	1
3' TYK2	0.666667	0	1	1
3' VAV2	1	0	1	1
3' YAP1	0.545455	0	1	1
5' AURKA	1
5' BCL9	1
5' E2F3	0.5
5' ERBB3	0.75
5' ERG	0.5
5' GNA12	0.833333
5' HDAC7	1
5' JAK2	0.666667
5' MAP2K2	0.666667
5' MCL1	0.666667
5' NCSTN	0.5
5' NFE2L2	0.571429
5' NUP98	0.5
5' PLCB4	1
5' RHOA	1
5' RICTOR	0.5
5' TFE3	0.8
5' TYK2	0.5
5' UBR5	0.5
3' CARD11	1
3' CCND1	1
3' FGFR3	0.8
3' IGF2	0.764706
3' MECOM	1
3' MLLT10	1
3' PLCB4	1
3' SS18	1
3' STAT5B	0.666667
3' WWTR1	0.5
3' YY1	1
