# Supplementary material for: Genetic fusions favor tumorigenesis through degron loss in oncogenes
Source: Nat Commun. 2021 Nov 18;12:6704. doi: 10.1038/s41467-021-26871-y (PMC8602260; doi:10.1038/s41467-021-26871-y)
Supplement: Supplementary file 5 — Dataset 3 [file 41467_2021_26871_MOESM5_ESM.xlsx]

## Sheet: Sheet1
gene	inframe frac	p-value	q-value
5' ACPP	0.818182	0.0001	0.0135933
5' ASMTL	1	0.0001	0.0135933
5' CCDC6	0.931034	0.0001	0.0135933
5' CDS1	1	0.0001	0.0135933
5' CLDN18	1	0.0001	0.0135933
5' DNAJB1	1	0.0001	0.0135933
5' ERG	0.5	0.0001	0.0135933
5' FBXL20	0.425	0.0001	0.0135933
5' MRPL48	0.533333	0.0001	0.0135933
5' PML	0.823529	0.0001	0.0135933
5' RAF1	0.866667	0.0001	0.0135933
5' SFTPB	0.875	0.0001	0.0135933
5' SS18	0.785714	0.0001	0.0135933
5' TMPRSS2	0.661538	0.0001	0.0135933
5' UBTF	0.777778	0.0001	0.0135933
3' AGGF1	1	0.0001	0.0149
3' CPB1	0.352941	0.0001	0.0149
3' CSN2	0.727273	0.0001	0.0149
3' DTX4	1	0.0001	0.0149
3' ERG	0.705882	0.0001	0.0149
3' MAML3	0.9	0.0001	0.0149
3' MYRFL	0.333333	0.0001	0.0149
3' PRKACA	0.875	0.0001	0.0149
3' RARA	0.727273	0.0001	0.0149
3' RET	0.948718	0.0001	0.0149
3' SEPT14	0.833333	0.0001	0.0149
3' TFE3	0.933333	0.0001	0.0149
3' TMPRSS2	0.375	0.0001	0.0149
3' ARHGAP26	0.928571	0.0002	0.0258267
3' HP	0.833333	0.0002	0.0258267
3' ETV4	0.857143	0.0003	0.0363187
5' PAX8	0.888889	0.0004	0.050975
3' BRAF	0.863636	0.0004	0.0455765
3' MSI2	0.5625	0.0005	0.0538056
5' LRP5	0.388889	0.0006	0.0719647
5' CABLES1	0.714286	0.0007	0.0751211
5' PIP4K2B	0.5	0.0007	0.0751211
3' SSX2	1	0.0007	0.0713632
5' PPFIA2	0.833333	0.0008	0.0776762
5' SFPQ	0.777778	0.0008	0.0776762
5' SPAG9	0.454545	0.0009	0.0834136
3' TCF7L2	0.571429	0.0015	0.145275
3' SSX1	1	0.0017	0.156805
5' CLPB	0.666667	0.0018	0.154683
5' CACNB1	0.4	0.002	0.154683
5' MED1	0.444444	0.002	0.154683
5' METTL25	0.8	0.002	0.154683
5' SYNRG	0.571429	0.0021	0.154683
3' SFTPB	0.5	0.0021	0.184895
5' CHD4	0.666667	0.0022	0.154683
5' PBX1	0.75	0.0022	0.154683
3' ROS1	1	0.0022	0.185278
5' CAMKK2	0.666667	0.0023	0.156323
3' IKZF3	0.230769	0.0025	0.201448
3' KDM2B	0.444444	0.0026	0.201448
5' NCOA4	1	0.0028	0.179185
5' RUNX1	0.5	0.0029	0.179185
5' TMEM135	0.545455	0.0029	0.179185
3' PPARG	0.6	0.003	0.222396
3' CTSB	0.8	0.0031	0.222396
5' EGFR	0.772727	0.0035	0.2039
5' TRPS1	0.666667	0.0035	0.2039
3' RUNX1T1	0.8	0.004	0.276714
3' FLNA	1	0.0043	0.284093
3' C11orf80	0.666667	0.0044	0.284093
5' HMGA2	0.6875	0.0048	0.271867
3' NTRK3	0.875	0.005	0.312419
5' ZDHHC17	0.692308	0.0055	0.303095
5' BRAF	0.818182	0.0066	0.354142
3' PITPNC1	0.636364	0.008	0.440511
3' IGF2	0.764706	0.0087	0.440511
5' PPM1H	0.384615	0.0089	0.454597
5' ANO1	0.454545	0.0094	0.454597
3' PPFIA2	0.833333	0.0095	0.440511
5' PITPNC1	0.555556	0.0098	0.454597
3' RAB3IP	0.555556	0.0098	0.440511
3' ABL1	0.833333	0.01	0.440511
5' ARMC8	0.5	0.0106	0.454597
3' INSR	0.625	0.0106	0.440511
3' NBEA	1	0.011	0.440511
5' ENTPD1	1	0.0111	0.454597
3' GAB2	0.5	0.0113	0.440511
5' ATG5	0.333333	0.0116	0.454597
5' SLC45A3	0.75	0.0116	0.454597
3' FRS2	0.375	0.0118	0.440511
5' ACO2	0.555556	0.012	0.454597
3' NAV3	0.555556	0.012	0.440511
3' TTC28	0.6	0.012	0.440511
5' SSH2	0.2	0.0121	0.454597
5' CTNNA3	1	0.0122	0.454597
5' LUC7L2	0.6	0.0122	0.454597
5' NUP98	0.5	0.0122	0.454597
3' CC2D2B	1	0.0122	0.440511
3' CDH23	0.75	0.0123	0.440511
5' EIF2AK2	0.6	0.0124	0.454597
5' PDE7A	0.6	0.0124	0.454597
3' SYT1	0.333333	0.0124	0.440511
5' UBE2Z	0.5	0.0125	0.454597
3' CPA1	0.6	0.0126	0.440511
5' STIP1	0.428571	0.0127	0.454597
5' TESMIN	0.6	0.0127	0.454597
3' ETV1	1	0.0127	0.440511
3' SNTG1	0.6	0.0128	0.440511
5' NEU3	1	0.0129	0.454597
5' YEATS4	0.5	0.0131	0.454597
3' RBBP8	0.6	0.0131	0.440511
3' TSPAN8	0.166667	0.0131	0.440511
5' NAV3	0.272727	0.0132	0.454597
3' COMMD1	1	0.0132	0.440511
3' CPM	0.35	0.0132	0.440511
3' PRSS2	1	0.0132	0.440511
3' THSD4	0.75	0.0132	0.440511
5' ESR1	0.3	0.0133	0.454597
3' NUP107	0.6	0.0134	0.440511
3' PRKCA	0.454545	0.0134	0.440511
3' YEATS4	0.428571	0.0134	0.440511
5' NTN4	0.6	0.0135	0.454597
3' ADAM2	0.428571	0.0135	0.440511
3' MPO	0.375	0.0135	0.440511
5' GRHL2	0.411765	0.0136	0.454597
3' NKAIN3	0.6	0.0138	0.440511
5' NDRG1	0.375	0.014	0.460419
3' CTDSPL	0.75	0.014	0.440511
3' AVIL	0.875	0.0141	0.440511
3' SHANK2	0.526316	0.0163	0.50116
5' WDR70	0.714286	0.0168	0.543733
3' NSD1	0.875	0.017	0.514516
5' RNF121	0.571429	0.0175	0.557539
3' CAT	0.888889	0.0176	0.52448
3' ATP23	0.636364	0.0186	0.545882
3' NTRK1	1	0.0241	0.647616
5' ABCC3	1	0.0245	0.686663
5' ANK3	0.5	0.0256	0.686663
3' ALK	0.866667	0.0259	0.647616
3' TENM4	0.545455	0.0261	0.647616
5' BCR	0.545455	0.0268	0.686663
3' NFIX	0.666667	0.0271	0.647616
3' CA10	0.5	0.0272	0.647616
3' BRIP1	0.857143	0.0274	0.647616
3' DLG2	0.666667	0.0274	0.647616
5' VMP1	0.5625	0.0344	0.686663
3' TACC3	0.763158	0.0373	0.647616
5' SHANK2	0.409091	0.0375	0.686663
3' PTPRR	0.454545	0.0377	0.647616
5' OS9	0.769231	0.0385	0.686663
3' CDK12	0.4	0.0389	0.647616
5' SLC35E3	0.666667	0.0392	0.686663
5' MYLK	0.666667	0.0394	0.686663
5' CHD7	0.444444	0.0398	0.686663
5' CCM2	0.8	0.0401	0.686663
5' MYO1D	0.307692	0.0403	0.686663
3' RAD51C	0.571429	0.0404	0.647616
5' LYZ	0.8	0.041	0.686663
5' PDZRN3	0.8	0.0413	0.686663
3' KDM2A	0.444444	0.0417	0.647616
3' MTUS2	0.666667	0.0417	0.647616
5' CTDSP2	0.153846	0.0418	0.686663
5' NKD1	0.8	0.0418	0.686663
5' BPTF	0.266667	0.042	0.686663
5' NARS2	0.444444	0.042	0.686663
5' ASCC1	0.666667	0.0421	0.686663
5' CPS1	0.666667	0.0421	0.686663
5' NSD3	0.285714	0.0421	0.686663
5' APPBP2	0.5	0.0422	0.686663
5' AGGF1	1	0.0423	0.686663
3' DPP6	1	0.0423	0.647616
5' NVL	0.571429	0.0424	0.686663
3' NOD2	1	0.0424	0.647616
5' CDH1	0.5	0.0429	0.686663
3' DNM3	0.333333	0.0429	0.647616
3' LYRM4	0.666667	0.043	0.647616
3' RAF1	0.888889	0.0433	0.647616
5' NTRK3	0.8	0.0434	0.686663
5' PTPN1	0.8	0.0436	0.686663
3' COL1A2	0.571429	0.0439	0.647616
3' MED24	0.5	0.0439	0.647616
3' WNT5B	0.8	0.0442	0.647616
3' PPFIBP1	0.666667	0.0444	0.647616
3' PIP4K2C	0.571429	0.0448	0.647616
5' COL1A1	0.5	0.045	0.686663
3' GRIP1	0.5	0.0467	0.647616
5' COL4A1	1	0.0469	0.686663
5' BCAS3	0.513514	0.0484	0.686663
5' TAF4	0.75	0.0506	0.686663
5' RB1	0.538462	0.0509	0.686663
5' ACVR2A	0.4	0.0511	0.686663
3' ACTG2	0.857143	0.0514	0.647616
5' GALNT7	1	0.0515	0.686663
5' NADSYN1	0.666667	0.0521	0.686663
3' TSPAN31	0.571429	0.0525	0.647616
3' TEX2	0.7	0.0527	0.647616
3' NSMCE2	0.571429	0.0529	0.647616
5' FGFR3	0.810811	0.0533	0.686663
3' ACOT7	0.8	0.0543	0.647616
5' PCBP2	0.5	0.0544	0.686663
5' NAALADL2	0.5	0.0545	0.686663
5' ITGB6	1	0.0554	0.686663
5' EFR3A	0.8	0.0563	0.686663
5' PREP	0.444444	0.0574	0.686663
5' TFE3	0.8	0.0576	0.686663
5' LEMD3	0.8	0.0579	0.686663
5' YEATS2	1	0.0581	0.686663
3' SRCIN1	1	0.0583	0.647616
3' B4GALNT2	0.5	0.0597	0.647616
5' COLGALT1	0.8	0.0611	0.686663
5' RAB21	0.5	0.0616	0.686663
5' ERC1	0.733333	0.0662	0.686663
3' CTTN	1	0.0683	0.647616
5' EML4	0.833333	0.0691	0.686663
5' ERBB2	0.555556	0.07	0.686663
5' CPSF6	0.5	0.071	0.686663
5' FGFR2	0.944444	0.072	0.686663
3' TSHZ2	0.611111	0.075	0.647616
5' PRC1	1	0.0763	0.686663
5' RET	0.666667	0.0766	0.686663
3' ENOPH1	0.666667	0.0766	0.647616
3' MSR1	1	0.0767	0.647616
3' TIPRL	0.666667	0.0771	0.647616
5' TFDP1	1	0.0772	0.686663
5' UNK	0.222222	0.0774	0.686663
3' ADGRE3	1	0.0774	0.647616
5' SARS	1	0.0775	0.686663
3' TPRG1	0.285714	0.0776	0.647616
3' ZSCAN4	0.666667	0.0777	0.647616
5' NCOA1	0.666667	0.078	0.686663
5' SPRR2G	1	0.0782	0.686663
3' CTNND1	1	0.0782	0.647616
5' ERO1B	1	0.0784	0.686663
3' SAMM50	1	0.0784	0.647616
3' SMR3B	0.333333	0.0784	0.647616
5' ADIPOR2	0.666667	0.0787	0.686663
5' TLN1	1	0.0787	0.686663
5' CTNND1	0.333333	0.0788	0.686663
3' CDH10	0.666667	0.0788	0.647616
3' EFCAB3	0.5	0.0788	0.647616
3' REG4	0.666667	0.0789	0.647616
3' RPL5	0.333333	0.0789	0.647616
5' PRRG2	0.666667	0.079	0.686663
3' SLC28A3	0.666667	0.0791	0.647616
5' ZNF79	0.666667	0.0792	0.686663
3' ACTN3	0.666667	0.0792	0.647616
3' ANK3	0.4	0.0792	0.647616
3' ELK3	0.666667	0.0792	0.647616
5' SMC5	1	0.0793	0.686663
3' RHOD	0.5	0.0794	0.647616
3' FBXL20	0.5	0.0795	0.647616
3' PEMT	0.5	0.0795	0.647616
5' FAM169A	1	0.0796	0.686663
3' ATG5	1	0.0796	0.647616
3' HEATR1	0.666667	0.0796	0.647616
5' GPC6	1	0.0797	0.686663
3' KCMF1	1	0.0797	0.647616
3' MPC2	0.666667	0.0797	0.647616
3' LYPLA1	1	0.0798	0.647616
5' ASB4	1	0.0799	0.686663
5' SLC30A4	0.666667	0.0799	0.686663
5' TMEM167A	0.666667	0.0799	0.686663
5' NUAK1	1	0.08	0.686663
5' BLNK	0.666667	0.0801	0.686663
3' AHRR	0.4	0.0801	0.647616
3' TAF4B	0.666667	0.0801	0.647616
3' CPT1A	0.333333	0.0802	0.647616
3' HSD17B14	0.5	0.0802	0.647616
3' STK33	1	0.0802	0.647616
3' TTC6	0.5	0.0802	0.647616
5' TRAF7	0.666667	0.0803	0.686663
3' TADA2A	0.5	0.0804	0.647616
5' GOLGB1	1	0.0805	0.686663
5' ARHGEF1	0.666667	0.0806	0.686663
3' NAE1	1	0.0806	0.647616
5' ADGRF5	1	0.0808	0.686663
5' FLNA	0.333333	0.0808	0.686663
3' NOTCH2	0.5	0.0809	0.647616
3' ARID3A	0.666667	0.081	0.647616
3' LARGE2	1	0.081	0.647616
3' STIM1	1	0.081	0.647616
5' MAPKAP1	1	0.0812	0.686663
5' PDE4B	0.666667	0.0812	0.686663
5' TARS2	0.666667	0.0812	0.686663
3' EMSY	0.4	0.0812	0.647616
3' POP4	1	0.0813	0.647616
5' AASS	1	0.0814	0.686663
5' ARHGEF25	1	0.0814	0.686663
5' REG1B	1	0.0814	0.686663
3' ALS2CR12	0.4	0.0814	0.647616
3' TNK2	1	0.0814	0.647616
3' TTC27	1	0.0814	0.647616
5' SIN3B	1	0.0815	0.686663
3' ACACA	0.5	0.0815	0.647616
3' CLEC2B	0.666667	0.0815	0.647616
3' EGLN1	1	0.0815	0.647616
3' KSR1	1	0.0815	0.647616
3' TCTN1	1	0.0815	0.647616
3' MED27	0.4	0.0816	0.647616
5' PPARG	0.666667	0.0817	0.686663
3' COPB2	1	0.0817	0.647616
5' PLEKHB1	1	0.0818	0.686663
5' SLC34A2	1	0.0818	0.686663
3' MGMT	0.5	0.0818	0.647616
5' CS	0.666667	0.0819	0.686663
5' LIMK1	0.666667	0.0819	0.686663
5' TAB2	0.666667	0.0819	0.686663
3' PIK3C2G	0.666667	0.0819	0.647616
3' RGMB	1	0.0819	0.647616
5' NEDD1	0.666667	0.082	0.686663
5' NIT1	1	0.082	0.686663
5' PACRG	1	0.082	0.686663
5' SNRNP40	0.4	0.082	0.686663
3' EIF5	1	0.082	0.647616
3' HS3ST4	0.4	0.082	0.647616
5' ATM	1	0.0821	0.686663
3' NXN	1	0.0821	0.647616
3' USP28	1	0.0821	0.647616
5' MVP	0.666667	0.0822	0.686663
5' OAF	1	0.0822	0.686663
5' ODF2	0.666667	0.0822	0.686663
3' AKR1D1	1	0.0822	0.647616
3' MYC	1	0.0822	0.647616
5' HDAC2	1	0.0823	0.686663
5' MIEF2	1	0.0823	0.686663
5' PLAUR	0.333333	0.0823	0.686663
5' TSPAN9	0.666667	0.0823	0.686663
5' TTC27	0.666667	0.0823	0.686663
3' ANO10	0.666667	0.0823	0.647616
3' LMCD1	1	0.0823	0.647616
3' MYBPC1	0.5	0.0823	0.647616
3' RIOK1	0.666667	0.0823	0.647616
3' RMDN2	1	0.0823	0.647616
3' VAV1	0.666667	0.0823	0.647616
5' PODXL	0.666667	0.0824	0.686663
5' TRIM28	0.666667	0.0824	0.686663
3' FZR1	0.666667	0.0824	0.647616
3' MAP7D2	1	0.0824	0.647616
3' PITPNM1	0.666667	0.0824	0.647616
5' TF	1	0.0825	0.686663
3' BRD4	0.666667	0.0825	0.647616
3' RPUSD2	1	0.0825	0.647616
5' RPL13	1	0.0826	0.686663
3' COX7B	1	0.0826	0.647616
3' PPIA	1	0.0826	0.647616
3' PRCC	1	0.0826	0.647616
5' GFOD1	1	0.0827	0.686663
3' FCHSD2	0.285714	0.0827	0.647616
5' CSN2	1	0.0828	0.686663
5' SNAPC5	1	0.0828	0.686663
3' CDH1	0.666667	0.0828	0.647616
3' MORC3	0.666667	0.0828	0.647616
3' TMEM120A	0.666667	0.0828	0.647616
3' C2orf78	0.666667	0.0829	0.647616
3' CAMK2G	0.5	0.0829	0.647616
5' MAPRE1	0.5	0.083	0.686663
5' RUNX2	0.666667	0.083	0.686663
5' SETD5	0.5	0.083	0.686663
5' SLC37A1	0.666667	0.083	0.686663
5' TMEM265	1	0.083	0.686663
3' CIB1	0.666667	0.0831	0.647616
3' TMEM207	0.5	0.0831	0.647616
5' ATP9B	1	0.0832	0.686663
3' ANO1	0.181818	0.0832	0.647616
3' C17orf64	0.4	0.0832	0.647616
3' CDK17	0.5	0.0832	0.647616
3' FGA	1	0.0832	0.647616
5' LRRC59	0.666667	0.0833	0.686663
5' VAMP1	0.666667	0.0833	0.686663
3' ARID1B	1	0.0833	0.647616
3' COMMD6	0.666667	0.0833	0.647616
3' GHR	0.666667	0.0833	0.647616
3' HDDC2	1	0.0833	0.647616
3' METTL25	1	0.0833	0.647616
3' PTPN1	1	0.0833	0.647616
5' ARRB1	0.153846	0.0834	0.686663
5' BCOR	1	0.0834	0.686663
5' CD99L2	1	0.0834	0.686663
5' CYFIP1	1	0.0834	0.686663
5' KITLG	0.666667	0.0834	0.686663
5' ZNF586	0.666667	0.0834	0.686663
5' FBXL7	0.4	0.0835	0.686663
5' MYO9A	0.5	0.0835	0.686663
5' RMDN1	1	0.0835	0.686663
5' RPS6KC1	0.4	0.0835	0.686663
3' PTGR2	1	0.0835	0.647616
3' RBPJ	0.666667	0.0835	0.647616
3' RSRC1	1	0.0835	0.647616
5' CACNA1G	1	0.0836	0.686663
5' CDH23	1	0.0836	0.686663
5' DOK5	0.666667	0.0836	0.686663
5' EFHD1	1	0.0836	0.686663
5' SORL1	0.222222	0.0836	0.686663
3' POGZ	0.666667	0.0836	0.647616
3' THSD7B	0.5	0.0836	0.647616
3' IGSF23	0.5	0.0837	0.647616
5' ELK3	0.666667	0.0838	0.686663
5' MLLT6	0.333333	0.0838	0.686663
5' RTN4RL2	0.666667	0.0838	0.686663
3' CTTNBP2NL	0.666667	0.0838	0.647616
3' PLEKHA2	0.5	0.0838	0.647616
3' VPS33B	0.666667	0.0838	0.647616
5' OSBPL10	0.666667	0.0839	0.686663
5' UNC5B	0.666667	0.0839	0.686663
3' QKI	0.5	0.0839	0.647616
3' STK32C	1	0.0839	0.647616
3' TYK2	0.666667	0.0839	0.647616
3' UCKL1	0.666667	0.0839	0.647616
5' EFCAB2	1	0.084	0.686663
5' SREBF2	0.333333	0.084	0.686663
5' CSTA	1	0.0841	0.686663
3' KARS	1	0.0841	0.647616
5' CTNNBL1	0.666667	0.0842	0.686663
5' LSM1	0.4	0.0842	0.686663
3' ADK	0.333333	0.0842	0.647616
5' DHCR7	1	0.0843	0.686663
5' GRK2	0.5	0.0843	0.686663
3' DNAH3	1	0.0843	0.647616
3' PLCB4	1	0.0843	0.647616
3' RGS17	1	0.0843	0.647616
3' TCP11L2	0.666667	0.0843	0.647616
5' ANKRD17	0.5	0.0844	0.686663
5' CAST	1	0.0844	0.686663
5' NCSTN	0.5	0.0844	0.686663
5' RPF2	1	0.0844	0.686663
3' ASCC2	0.666667	0.0844	0.647616
3' RNF169	0.666667	0.0844	0.647616
5' CEL	0.666667	0.0845	0.686663
5' ELK4	0.666667	0.0845	0.686663
3' OTUD7B	1	0.0845	0.647616
3' PSMB3	0.5	0.0845	0.647616
3' SLC2A8	0.666667	0.0845	0.647616
5' SYCP2	1	0.0846	0.686663
3' INA	0.666667	0.0846	0.647616
3' AMBP	1	0.0847	0.647616
3' ASPH	0.4	0.0847	0.647616
3' COL24A1	1	0.0847	0.647616
3' FAM117A	0.4	0.0847	0.647616
3' TOR1AIP1	0.666667	0.0847	0.647616
5' ANKRD22	1	0.0848	0.686663
5' DDX42	0.666667	0.0848	0.686663
5' DYRK2	1	0.0848	0.686663
5' PCSK5	0.666667	0.0848	0.686663
3' COL4A2	1	0.0848	0.647616
3' PGD	1	0.0848	0.647616
3' PSMB7	0.666667	0.0848	0.647616
5' ANTXR2	1	0.0849	0.686663
5' CDKL2	1	0.0849	0.686663
3' ASAP1	1	0.0849	0.647616
3' GUSB	1	0.0849	0.647616
3' PLEKHF1	0.5	0.0849	0.647616
3' TXNRD1	0.5	0.0849	0.647616
5' CYP2E1	1	0.085	0.686663
3' STRN	1	0.085	0.647616
5' FRS2	0.666667	0.0851	0.686663
3' PKP4	0.666667	0.0851	0.647616
3' RDH11	0.5	0.0851	0.647616
5' ACTR3B	1	0.0852	0.686663
5' BCL3	0.5	0.0852	0.686663
3' CCDC28B	0.5	0.0852	0.647616
3' TBC1D15	0.5	0.0852	0.647616
5' NOS1AP	0.25	0.0853	0.686663
5' SYPL1	0.666667	0.0853	0.686663
3' GALNT13	1	0.0853	0.647616
3' TYROBP	0.666667	0.0853	0.647616
5' ASXL1	0.285714	0.0854	0.686663
3' IKBKB	0.666667	0.0854	0.647616
3' RIOK3	0.666667	0.0854	0.647616
5' CP	0.333333	0.0855	0.686663
5' MCU	0.5	0.0855	0.686663
5' SIAH2	1	0.0855	0.686663
3' C20orf96	0.666667	0.0855	0.647616
3' PIK3AP1	1	0.0855	0.647616
5' F3	1	0.0856	0.686663
5' FGFR1	0.4	0.0856	0.686663
5' SPAG17	1	0.0856	0.686663
3' CHD4	0.5	0.0856	0.647616
3' TMEM256	1	0.0856	0.647616
5' RAP2B	1	0.0857	0.686663
5' PRDX6	0.666667	0.0858	0.686663
5' PTPN13	0.666667	0.0858	0.686663
5' SEC24D	1	0.0858	0.686663
5' BCL9	1	0.0859	0.686663
3' EIF4E2	1	0.0859	0.647616
5' PICALM	0.4	0.086	0.686663
5' RSRC2	1	0.086	0.686663
3' ACAP2	1	0.086	0.647616
3' UBFD1	1	0.086	0.647616
5' FBXO32	0.666667	0.0861	0.686663
3' KCTD14	0.666667	0.0861	0.647616
5' FGB	1	0.0862	0.686663
5' MAN1A2	0.4	0.0863	0.686663
3' CWF19L2	0.666667	0.0863	0.647616
5' PATJ	0.5	0.0864	0.686663
3' ARMC2	0.333333	0.0864	0.647616
3' C2CD3	0.333333	0.0865	0.647616
3' YTHDF2	0.4	0.0865	0.647616
5' RPS6KB1	0.666667	0.0866	0.686663
3' CRTC1	0.666667	0.0866	0.647616
3' ZDHHC24	0.666667	0.0866	0.647616
3' CAPRIN1	0.666667	0.0867	0.647616
3' CCDC112	0.666667	0.0868	0.647616
3' PCDH15	0.5	0.0869	0.647616
3' VWA5A	1	0.0869	0.647616
5' IGFBP7	1	0.087	0.686663
5' TXNRD1	0.5	0.087	0.686663
3' CDC6	0.4	0.0871	0.647616
5' XBP1	1	0.0872	0.686663
5' GXYLT2	1	0.0873	0.686663
5' PRSS2	0.666667	0.0873	0.686663
3' CCDC25	1	0.0875	0.647616
3' ABCA8	1	0.0876	0.647616
3' CRB3	1	0.0877	0.647616
3' MRPS21	1	0.0877	0.647616
5' MND1	1	0.0878	0.686663
5' PRPF6	0.666667	0.0878	0.686663
3' CLEC9A	1	0.0878	0.647616
3' EIF4EBP1	0.333333	0.0878	0.647616
5' KCNAB2	1	0.0879	0.686663
5' SLC10A7	1	0.0879	0.686663
3' ABLIM1	1	0.088	0.647616
3' MAP2	1	0.088	0.647616
5' PKM	1	0.0881	0.686663
5' SGPL1	0.5	0.0881	0.686663
3' PPP2R1A	0.666667	0.0883	0.647616
3' UNC5D	0.625	0.0883	0.647616
3' TUBD1	0.333333	0.0886	0.647616
5' NSA2	1	0.089	0.686663
5' RB1CC1	0.666667	0.089	0.686663
3' EVX1	0.666667	0.0891	0.648822
5' GTF2E2	0.4	0.0893	0.686663
5' SLC4A4	0.5	0.0893	0.686663
5' PC	0.666667	0.0895	0.686663
5' STARD3	0.555556	0.0895	0.686663
3' CELA3A	1	0.0896	0.650019
5' MRPL21	0.333333	0.0899	0.686663
3' NOL8	1	0.0903	0.652387
5' MDM2	0.357143	0.0905	0.686663
5' TBC1D9	0.5	0.0905	0.686663
5' TSTD1	1	0.0905	0.686663
3' ERBB2	0.454545	0.0906	0.652387
5' E2F5	0.666667	0.0908	0.686663
3' KCNC2	0.416667	0.091	0.652841
5' KAT6A	0.384615	0.0911	0.686663
5' AKR1C3	1	0.0913	0.686663
5' FOXK2	0.294118	0.0915	0.686663
5' HOOK3	0.555556	0.0916	0.686663
3' IGFBP4	0.666667	0.0919	0.656865
5' GNA12	0.833333	0.0922	0.688629
5' VTI1A	0.454545	0.0926	0.688811
5' IGF1R	0.714286	0.0929	0.688811
5' SND1	0.555556	0.0936	0.691487
3' ACER3	0.714286	0.0942	0.670829
5' SLC12A2	1	0.0945	0.695616
5' EHBP1	0.833333	0.0951	0.697514
5' SEPT9	0.277778	0.0961	0.702322
3' AAMDC	0.625	0.0961	0.681852
3' EXOC4	0.833333	0.0969	0.685019
5' NF2	0.727273	0.099	0.720932
5' ETV6	0.85	0.0999	0.724897
3' CCT2	0.625	0.1007	0.709294
5' USP32	0.6	0.1008	0.728834
5' PACS1	0.8	0.1018	0.733464
3' WRAP53	0.875	0.1095	0.768484
5' BAG4	1	0.1128	0.808446
5' TLK2	0.777778	0.113	0.808446
5' MED24	0.538462	0.1137	0.810609
5' ARID1B	0.7	0.1217	0.864621
3' SND1	0.636364	0.1294	0.904866
5' MSI2	0.52	0.1309	0.926754
5' ARFGEF2	0.714286	0.1361	0.959241
5' RAD51B	0.454545	0.1366	0.959241
5' EZR	0.833333	0.1369	0.959241
3' AKAP6	0.833333	0.1388	0.967106
5' SKAP1	0.454545	0.1389	0.969922
3' ATP11B	1	0.1397	0.969889
5' ECE1	0.833333	0.1402	0.97442
5' MTHFD1L	0.833333	0.1405	0.97442
5' LAMB1	1	0.1435	0.991853
5' LUC7L3	0.5	0.144	0.991946
3' CCDC6	0.833333	0.1444	0.998939
5' ADAM10	0.833333	0.1446	0.992725
3' VMP1	0.625	0.145	0.99952
5' GLIS3	0.714286	0.1462	0.997678
5' MYO5A	1	0.1463	0.997678
3' CDKAL1	0.6	0.1464	1
3' COL21A1	0.833333	0.1477	1
5' ZMYND8	0.714286	0.1492	1
3' KIAA0391	0.833333	0.1494	1
3' COL1A1	0.625	0.1497	1
5' DPP3	1	0.15	1
5' NCOR1	0.5	0.1505	1
3' THADA	0.625	0.1511	1
3' COG4	0.857143	0.1521	1
3' SMG6	0.857143	0.1524	1
5' CPM	0.6	0.1534	1
5' THSD4	0.75	0.1541	1
3' TERT	0.4	0.1544	1
5' MARK3	0.428571	0.1545	1
5' SH3GL1	0.75	0.1571	1
5' TCF12	0.5	0.1579	1
5' UVRAG	0.538462	0.1639	1
5' TBCD	0.75	0.1725	1
5' PUM1	0.75	0.1729	1
3' OS9	0.666667	0.1895	1
5' STK3	0.727273	0.1981	1
5' LAMA3	0.727273	0.203	1
5' TRIO	0.470588	0.2069	1
5' FRYL	1	0.2117	1
5' HSD17B12	1	0.2155	1
3' SLC9A8	0.6	0.2159	1
5' ADAMTS2	1	0.2168	1
5' WWP1	0.6	0.2168	1
3' SAP30	1	0.217	1
5' GP2	1	0.2172	1
5' RMND1	0.75	0.2174	1
3' TLK2	0.75	0.2178	1
3' CSMD1	0.375	0.2179	1
3' DNAJC1	0.75	0.218	1
3' C10orf90	1	0.2181	1
5' NOTCH2	0.6	0.2183	1
5' PTEN	0.25	0.2183	1
3' VANGL1	0.75	0.2185	1
5' ALK	1	0.2187	1
3' RBX1	0.6	0.2187	1
5' CHCHD6	0.6	0.2188	1
3' DCAF7	0.75	0.219	1
3' KATNAL2	0.75	0.219	1
3' KIF22	0.75	0.2192	1
3' ATP13A1	1	0.2193	1
5' ZNF292	0.545455	0.2194	1
3' AKT3	0.75	0.2194	1
3' SPRR1B	1	0.2196	1
5' DLG5	0.75	0.2197	1
3' WIPF2	0.428571	0.2197	1
5' CHMP4B	0.428571	0.22	1
5' STUB1	0.75	0.22	1
5' GID4	1	0.2202	1
5' TLK1	0.428571	0.2202	1
5' DMD	1	0.2204	1
3' HMGA2	0.75	0.2204	1
3' DCAF6	0.75	0.2205	1
3' PTEN	0.6	0.2205	1
5' DOCK7	0.75	0.2208	1
5' MCM5	0.5	0.2208	1
3' NAV1	0.75	0.2208	1
3' CCDC88A	1	0.2209	1
3' DAB1	1	0.2209	1
3' HMGCS2	1	0.2209	1
3' MUCL1	0.6	0.221	1
3' SUPT5H	1	0.221	1
3' TUFT1	1	0.221	1
5' EIF2S2	0.6	0.2211	1
3' KIAA0319	1	0.2211	1
3' ARHGAP23	0.5	0.2212	1
3' NLGN1	0.5	0.2212	1
3' TNC	0.75	0.2212	1
5' ANXA2	1	0.2213	1
5' HDAC1	0.428571	0.2214	1
5' R3HDM2	0.5	0.2214	1
3' LRRC1	0.75	0.2214	1
3' SFSWAP	0.75	0.2214	1
3' F7	0.6	0.2215	1
5' CDC37	1	0.2216	1
3' MPZL1	0.75	0.2216	1
3' ZNF462	1	0.2216	1
3' USP15	0.6	0.2217	1
3' SEZ6	1	0.2219	1
5' AMD1	1	0.2221	1
5' DDX52	0.6	0.2221	1
3' NAALADL2	0.428571	0.2221	1
3' CAP1	0.6	0.2222	1
3' FNDC3B	0.75	0.2222	1
5' ADK	0.3	0.2223	1
5' HNRNPUL1	0.857143	0.2223	1
5' KLHL7	1	0.2223	1
5' NOTCH1	0.5	0.2223	1
5' PLPP1	0.25	0.2223	1
3' CASR	0.428571	0.2223	1
5' UAP1	0.6	0.2224	1
3' ARL3	0.5	0.2224	1
3' PDE4D	0.75	0.2224	1
3' SSH2	0.5	0.2224	1
3' RAI1	1	0.2225	1
5' KDM5A	0.857143	0.2226	1
5' PHF3	0.75	0.2226	1
5' PDGFRA	1	0.2228	1
3' RGS6	0.5	0.2228	1
5' CEP350	0.75	0.223	1
5' STK38	0.75	0.223	1
3' EPHB2	1	0.223	1
5' RARA	0.214286	0.2231	1
3' CMPK1	1	0.2231	1
5' OCLN	0.75	0.2233	1
3' BCAN	1	0.2233	1
5' ASH1L	0.375	0.2234	1
5' MVB12B	1	0.2234	1
5' PTGFRN	1	0.2234	1
5' RICTOR	0.5	0.2234	1
3' CRYL1	0.6	0.2234	1
3' PPP1R37	1	0.2234	1
3' CHRM3	1	0.2235	1
3' P4HB	1	0.2235	1
3' METTL4	0.6	0.2237	1
5' FOXO3	1	0.2238	1
5' PTPRR	0.375	0.2238	1
5' CCNY	0.666667	0.224	1
5' COMMD10	1	0.224	1
3' NUBPL	0.75	0.2241	1
5' CDK12	0.176471	0.2242	1
5' MICALL2	0.5	0.2242	1
3' MLLT10	1	0.2242	1
3' YAP1	0.545455	0.2242	1
5' CTTN	0.5	0.2243	1
5' LTBP1	1	0.2243	1
5' RBM38	0.6	0.2244	1
5' ADCY9	0.3	0.2245	1
3' HOMER2	0.75	0.2245	1
3' ASCC1	0.5	0.2246	1
5' ALG8	0.6	0.2247	1
5' NEO1	0.75	0.2247	1
3' THAP10	1	0.2247	1
5' FAM53B	0.5	0.2248	1
3' MYO9B	0.666667	0.2248	1
3' OSBPL8	0.6	0.2248	1
5' EXT1	0.428571	0.2249	1
3' MAPKAP1	0.75	0.2249	1
3' VPS50	0.6	0.2249	1
5' C11orf80	0.333333	0.225	1
5' SOCS7	0.5	0.225	1
5' ALCAM	0.75	0.2251	1
5' MARS	0.75	0.2251	1
5' NOP58	1	0.2251	1
5' YBX3	0.5	0.2251	1
3' CCNL2	1	0.2251	1
3' KAT14	1	0.2251	1
3' UBE3D	1	0.2251	1
5' GOLGA4	0.6	0.2252	1
5' GSK3B	0.4	0.2252	1
3' LNP1	0.75	0.2252	1
5' ARHGAP44	0.75	0.2253	1
5' ITSN2	0.6	0.2253	1
5' TNIP1	0.6	0.2253	1
3' FNTA	0.75	0.2253	1
3' SLC6A15	0.75	0.2253	1
5' ARHGAP32	0.6	0.2254	1
5' PRPF19	1	0.2254	1
3' PCTP	0.75	0.2254	1
5' ADAM9	0.428571	0.2255	1
5' WDR20	0.6	0.2255	1
3' RCOR1	1	0.2255	1
5' TBC1D10A	0.75	0.2256	1
3' ABCC5	0.6	0.2256	1
3' SLCO2B1	0.75	0.2256	1
5' BCL2L13	0.75	0.2257	1
5' DVL2	1	0.2257	1
5' TRIT1	0.75	0.2257	1
3' PDE4A	0.75	0.2259	1
5' BRWD1	0.272727	0.226	1
5' COMMD9	0.75	0.226	1
5' TCF3	0.6	0.226	1
3' ABCC3	0.75	0.226	1
3' SGCD	1	0.226	1
3' ZMAT4	0.333333	0.226	1
5' PAWR	0.75	0.2261	1
5' PLEKHH1	1	0.2261	1
3' PREX1	0.6	0.2261	1
5' NEDD4L	0.428571	0.2262	1
5' CRYL1	0.6	0.2263	1
5' RHOA	1	0.2263	1
3' EHBP1	0.6	0.2263	1
3' PHF12	0.6	0.2263	1
5' ROBO1	0.6	0.2264	1
3' PFDN2	0.5	0.2264	1
3' SLC4A4	0.5	0.2264	1
3' SPINT2	0.6	0.2264	1
3' TTC39A	0.75	0.2264	1
5' AP2A2	0.428571	0.2265	1
5' EPC1	0.6	0.2265	1
3' DNAH5	1	0.2265	1
3' HIST1H2AC	0.6	0.2265	1
3' MDM2	0.75	0.2265	1
5' CASC4	0.75	0.2266	1
5' EHF	1	0.2266	1
5' FXR1	0.5	0.2266	1
5' TIGAR	0.6	0.2266	1
3' KCNIP3	1	0.2266	1
3' LHFPL4	1	0.2266	1
5' GPHN	0.5	0.2267	1
5' ZFHX3	0.5	0.2267	1
5' MTDH	0.5	0.2268	1
5' TOP1	0.3	0.2268	1
5' COBL	0.75	0.2269	1
3' LTBP1	1	0.2269	1
3' MIPEP	0.5	0.2269	1
3' TP53I3	1	0.2269	1
5' KCNQ5	0.6	0.227	1
5' PPME1	0.428571	0.227	1
5' SUCO	0.230769	0.227	1
5' TRIM25	0.75	0.227	1
3' F13A1	1	0.2271	1
3' AKR1E2	1	0.2272	1
3' BCAS1	0.428571	0.2272	1
3' RFTN2	0.75	0.2272	1
5' PPP2R2A	0.272727	0.2273	1
3' ENPP2	0.75	0.2273	1
5' FNBP1L	0.6	0.2274	1
5' IRF2BP2	0.75	0.2274	1
3' BICD1	1	0.2275	1
3' ENG	1	0.2275	1
3' GANC	1	0.2275	1
5' ZNF20	1	0.2276	1
3' CDH17	1	0.2276	1
3' NCKAP5	0.75	0.2277	1
5' MDM1	0.6	0.2278	1
3' PPIL4	1	0.2278	1
5' PRUNE1	0.75	0.2279	1
5' RELN	0.75	0.2279	1
5' TFG	0.6	0.2279	1
3' ESR1	0.6	0.2279	1
3' PKN2	1	0.2279	1
5' C2CD3	0.375	0.228	1
3' ANKRD31	1	0.228	1
3' FIP1L1	0.5	0.228	1
3' RABGAP1L	0.5	0.228	1
3' SYNE1	0.5	0.228	1
3' NKAIN2	0.75	0.2281	1
5' KIF3C	0.75	0.2282	1
5' PEMT	0.428571	0.2282	1
3' HM13	0.428571	0.2282	1
3' ADAMTS12	0.5	0.2283	1
3' CHMP1A	0.5	0.2283	1
5' TRIM24	0.75	0.2285	1
5' SPAG5	0.6	0.2286	1
5' SYNE1	0.75	0.2286	1
5' BOC	1	0.2287	1
5' SSBP3	1	0.2287	1
3' DNAJC2	1	0.2287	1
3' ST8SIA1	0.6	0.2287	1
5' DDX17	0.75	0.2289	1
5' SCN8A	0.75	0.2289	1
5' SLIT3	0.5	0.2289	1
5' ZNF91	1	0.2289	1
3' DTX1	0.75	0.229	1
5' C19orf47	0.75	0.2291	1
5' CAPZB	0.3	0.2291	1
3' SPATS2	0.75	0.2293	1
5' SRGAP3	0.333333	0.2294	1
5' OXSR1	0.75	0.2295	1
5' SAMD12	0.6	0.2295	1
3' YY1	1	0.2296	1
5' TDRD3	0.6	0.2298	1
5' TMEM132D	1	0.2298	1
5' UST	0.6	0.2299	1
5' UBL3	0.428571	0.2301	1
3' CLYBL	0.3	0.2302	1
3' LLGL2	0.75	0.2302	1
3' ITPR2	0.375	0.2303	1
3' MSL1	0.6	0.2303	1
3' DSCAM	0.6	0.2305	1
3' NEGR1	0.75	0.2305	1
5' GPATCH8	0.333333	0.2306	1
5' PIAS1	1	0.2306	1
5' PLXNA1	1	0.2307	1
5' ARSG	0.428571	0.2308	1
5' LMNA	0.6	0.2309	1
3' PRKAR2A	0.75	0.2309	1
5' HLCS	0.5	0.231	1
5' VPS13B	0.611111	0.231	1
3' KIAA1324	1	0.231	1
5' AFF3	0.857143	0.2311	1
5' TYMS	1	0.2312	1
5' DNAJC17	0.75	0.2313	1
5' STXBP4	0.75	0.2313	1
3' PGM5	0.6	0.2313	1
5' CHD1	0.6	0.2315	1
3' SPAG9	0.428571	0.2315	1
5' GALNT2	0.5	0.2318	1
3' HEATR6	0.428571	0.2318	1
5' EVPL	0.75	0.2319	1
3' FBN1	1	0.2319	1
5' KIAA0100	0.6	0.2321	1
3' AHCYL2	1	0.2323	1
5' PDCD6	0.75	0.2325	1
5' TMTC2	0.428571	0.2325	1
5' CREB3L2	0.75	0.2326	1
3' BAIAP2	0.428571	0.2328	1
5' UBE2G1	0.375	0.2331	1
5' TBC1D4	1	0.2332	1
3' IGFBP6	0.75	0.2333	1
3' TDRD12	0.6	0.2335	1
5' CD44	0.5	0.2343	1
5' MAN1A1	0.5	0.2344	1
3' TYRP1	0.75	0.2348	1
3' CPQ	0.428571	0.2358	1
5' SBF2	0.375	0.2373	1
3' NARS2	0.571429	0.2391	1
5' GTF2F2	1	0.2421	1
5' CDKN2A	0.777778	0.2485	1
5' TET3	0.7	0.249	1
3' MICU1	0.636364	0.2499	1
5' PRCC	0.777778	0.251	1
5' TSPAN31	1	0.2516	1
5' ACTN4	0.636364	0.252	1
5' CPD	0.466667	0.2529	1
5' CACNA1C	0.875	0.2543	1
5' TAOK1	0.466667	0.2568	1
3' SKAP1	0.411765	0.2572	1
5' ABR	0.538462	0.2592	1
3' EYS	0.5	0.3052	1
5' FCHSD2	0.473684	0.3139	1
5' TSFM	0.473684	0.3234	1
5' KIAA1671	0.8	0.3618	1
5' AGAP1	0.470588	0.365	1
3' IFT140	0.571429	0.3822	1
3' ETV6	1	0.3842	1
3' IFT88	0.8	0.3842	1
5' PIK3CB	0.571429	0.3855	1
5' SMYD3	0.666667	0.3856	1
5' DNAJC1	0.8	0.3857	1
5' RERE	0.4	0.3859	1
5' DSTN	0.444444	0.3864	1
3' C12orf10	0.8	0.3865	1
3' MRPS35	0.444444	0.3872	1
3' KCNMA1	0.666667	0.3874	1
3' CLPB	0.5	0.3877	1
3' RANBP17	1	0.3881	1
5' MICALL1	1	0.3885	1
5' NUDCD1	1	0.3885	1
3' TRHDE	0.4	0.3885	1
3' SRP68	0.4	0.3886	1
5' COL1A2	1	0.3892	1
5' RAB11FIP1	0.666667	0.3892	1
3' SDCCAG8	0.5	0.3892	1
3' TOX	0.8	0.3895	1
5' SUPT5H	0.444444	0.3896	1
3' FGGY	0.4	0.3897	1
5' MED13	0.333333	0.3899	1
5' NSMCE2	0.666667	0.3902	1
5' ERN1	0.8	0.3906	1
5' PDLIM5	1	0.3908	1
3' MLIP	0.666667	0.3908	1
3' ANO2	1	0.3909	1
5' ATAD2	0.444444	0.391	1
5' KDM3A	0.8	0.3913	1
3' CCND3	0.666667	0.3913	1
5' IKZF3	0.8	0.3914	1
5' RBL1	0.666667	0.3916	1
5' RANGAP1	0.5	0.3917	1
5' C6orf62	1	0.3918	1
5' BCAT1	0.8	0.392	1
3' RALY	0.666667	0.392	1
3' VPS13B	0.571429	0.392	1
3' CNTN5	0.4	0.3926	1
5' CCT3	0.4	0.3927	1
5' MYH10	0.8	0.3927	1
5' CC2D1A	0.444444	0.3928	1
5' MARK2	0.4	0.3928	1
3' COMMD7	1	0.3928	1
3' CTNND2	0.444444	0.3928	1
5' NEBL	0.5	0.3929	1
3' SMG1	1	0.393	1
5' TOM1L2	0.666667	0.3934	1
3' FGD4	0.8	0.3934	1
5' CBL	0.666667	0.3937	1
5' CHD6	0.571429	0.3937	1
3' PAAF1	0.8	0.3937	1
3' ANK1	0.666667	0.3939	1
5' EEA1	0.666667	0.3941	1
3' FAF1	0.571429	0.3941	1
3' SLC9A3R1	1	0.3941	1
5' DENND1A	0.5	0.3942	1
5' RABEP1	0.5	0.3942	1
3' TMEM99	1	0.3944	1
3' CA3	1	0.3945	1
3' QRSL1	0.8	0.3945	1
3' DNAJC5B	1	0.3946	1
5' CPT1A	0.363636	0.3948	1
5' STK10	0.8	0.3948	1
5' PRIM2	1	0.3949	1
3' PAK1	0.444444	0.395	1
3' PLPP4	0.571429	0.395	1
5' MAML2	0.8	0.3952	1
5' MLLT10	0.5	0.3952	1
3' GNAS	0.5	0.3952	1
3' NCR3	0.8	0.3952	1
5' BICD1	0.571429	0.3953	1
5' THOC5	0.666667	0.3953	1
3' TRPM1	1	0.3953	1
5' ARHGEF7	0.666667	0.3954	1
5' KIF13A	1	0.3955	1
3' ALG14	0.8	0.3958	1
5' MTCH2	0.8	0.396	1
3' DAND5	0.571429	0.396	1
5' ARHGEF17	1	0.3961	1
3' MED15	0.8	0.3961	1
5' TBC1D14	0.571429	0.3963	1
5' ULK1	0.8	0.3963	1
3' DENND1A	0.666667	0.3963	1
3' DRC3	0.8	0.3964	1
5' LRP8	0.666667	0.3965	1
5' DIAPH2	0.8	0.3967	1
5' TMEM241	0.8	0.3968	1
5' TTC28	0.4	0.397	1
3' SP2	0.571429	0.397	1
5' ASAP1	0.363636	0.3971	1
3' ABR	0.666667	0.3971	1
3' SF3A3	0.8	0.3971	1
5' ME1	1	0.3972	1
3' ARHGAP6	1	0.3973	1
3' CTNNA3	0.444444	0.3974	1
3' TBC1D30	0.571429	0.3974	1
5' DNM1L	0.666667	0.3975	1
3' SDC3	0.8	0.3976	1
5' CLU	0.666667	0.3977	1
5' LANCL2	0.571429	0.398	1
5' COG5	0.571429	0.3981	1
3' CDH18	0.571429	0.3981	1
3' CEP112	0.333333	0.3981	1
3' ELOF1	0.666667	0.3981	1
3' MYO5A	0.8	0.3981	1
3' NTRK2	1	0.3982	1
3' ANXA13	0.666667	0.3983	1
5' ARHGAP5	0.571429	0.3984	1
3' CLEC16A	0.8	0.3984	1
5' B3GLCT	0.666667	0.3985	1
3' BICC1	1	0.3988	1
5' MYO10	0.363636	0.3992	1
5' PSMD3	0.666667	0.3992	1
5' SENP3	0.8	0.3997	1
3' SPATA16	0.8	0.4	1
5' TRAPPC10	0.666667	0.4002	1
3' POU6F2	0.444444	0.4002	1
5' PRCP	1	0.4004	1
3' L2HGDH	0.8	0.4004	1
5' AXIN1	0.444444	0.4007	1
5' FMN1	0.5	0.401	1
3' BCAM	1	0.401	1
5' CLASRP	0.666667	0.4016	1
5' ANKLE2	0.571429	0.4022	1
5' NLK	0.5	0.4026	1
5' TM9SF2	0.8	0.4027	1
3' CLPTM1L	0.666667	0.403	1
5' CEP70	1	0.4032	1
5' ZC3H15	0.8	0.4032	1
5' TBL1XR1	1	0.4035	1
5' MAP2K2	0.666667	0.4055	1
5' GRB7	0.571429	0.4056	1
5' KDM2A	0.266667	0.4056	1
5' ADCY2	0.8	0.4073	1
5' MED15	0.666667	0.4081	1
3' PPP1R1B	0.647059	0.4142	1
5' NFIX	0.578947	0.4188	1
3' PACS1	0.7	0.4221	1
5' INPP5A	0.7	0.4247	1
3' ZBTB46	0.875	0.4255	1
5' MECOM	0.4375	0.4257	1
3' LYZ	0.466667	0.4274	1
5' PARD3	0.785714	0.4284	1
5' SASH1	0.777778	0.4285	1
5' SMURF1	0.538462	0.4294	1
5' RNF213	0.5	0.4296	1
5' NECTIN2	0.636364	0.4301	1
5' CDC5L	1	0.4317	1
3' SIPA1L3	0.636364	0.4334	1
5' ROCK1	0.666667	0.5473	1
3' ABCG1	0.833333	0.5512	1
5' KDM6A	0.5	0.5524	1
5' EP300	0.555556	0.5533	1
5' SPECC1L	0.714286	0.554	1
3' UVRAG	0.454545	0.5549	1
3' AGBL4	0.714286	0.5551	1
3' GPR37L1	0.714286	0.5555	1
3' LINGO2	0.625	0.5555	1
3' FAM168A	0.833333	0.5558	1
3' EXD3	0.555556	0.556	1
5' PCCA	0.333333	0.5562	1
3' PC	0.833333	0.5564	1
3' KALRN	0.454545	0.5569	1
5' CLIC4	0.833333	0.557	1
3' PUS7	0.416667	0.557	1
3' EFCAB6	0.625	0.5571	1
5' APP	0.625	0.5576	1
5' RNF217	0.714286	0.5576	1
5' RBFOX2	0.555556	0.5578	1
5' ERGIC1	0.714286	0.5579	1
3' TANGO6	0.833333	0.558	1
5' NPEPPS	0.714286	0.5586	1
5' SMARCC1	0.555556	0.5589	1
5' JMJD1C	0.833333	0.5591	1
5' RLF	0.833333	0.5591	1
3' PLXDC1	0.555556	0.5593	1
5' PDE4D	0.555556	0.5594	1
5' SMG1	0.625	0.5598	1
5' ATP1A1	0.833333	0.5603	1
5' ABI2	0.714286	0.5604	1
5' PPP1R12A	0.625	0.5604	1
3' HDAC5	0.714286	0.5604	1
3' YWHAE	0.625	0.5605	1
3' MET	0.625	0.5611	1
5' F11R	0.714286	0.5616	1
5' UTRN	0.357143	0.5616	1
5' ARHGAP23	0.625	0.5617	1
3' DYNC1I1	1	0.5618	1
5' UBE2K	0.714286	0.562	1
5' DIS3L2	0.833333	0.5623	1
3' NEDD4L	0.714286	0.5625	1
5' MAP3K5	0.714286	0.5626	1
5' ROCK2	0.625	0.5628	1
5' PABPC1	1	0.563	1
3' SSBP3	0.833333	0.563	1
3' SLC16A14	1	0.5632	1
5' JARID2	0.416667	0.5639	1
5' XXYLT1	0.833333	0.5643	1
5' SERINC5	0.833333	0.5647	1
5' KCNMA1	0.714286	0.5648	1
3' PDZRN4	0.833333	0.5649	1
5' LPP	0.714286	0.5652	1
5' SUFU	0.833333	0.5652	1
5' SLC38A10	0.5	0.5655	1
5' SEC23B	1	0.5656	1
3' MATN2	0.555556	0.5656	1
3' FTO	0.714286	0.5657	1
5' WBP1L	0.555556	0.5658	1
3' L3MBTL4	0.714286	0.5661	1
3' SPEF2	0.625	0.5667	1
5' AKAP9	1	0.5672	1
5' ETNK1	1	0.5672	1
5' STK39	0.625	0.568	1
5' ACOT7	0.5	0.5691	1
3' CCT3	0.714286	0.5695	1
3' MYH11	0.333333	0.5699	1
3' SLC25A21	0.625	0.5711	1
5' PGAP3	0.5	0.5712	1
5' SNX30	0.833333	0.5719	1
5' PIGU	0.555556	0.5782	1
5' KIF13B	0.615385	0.5785	1
3' NINJ2	1	0.5825	1
5' MED26	0.727273	0.5837	1
5' HECTD4	0.615385	0.5873	1
3' RAD51B	0.470588	0.5878	1
5' URI1	0.363636	0.5881	1
5' CREBBP	0.578947	0.5922	1
5' RASSF3	0.6	0.6263	1
5' EHMT1	1	0.6277	1
3' MGST2	0.75	0.6288	1
3' MACROD2	0.5	0.6295	1
5' MACROD1	0.545455	0.63	1
5' XPR1	0.545455	0.63	1
5' SRPK2	0.375	0.6307	1
5' DOCK1	0.666667	0.631	1
5' KMT2C	0.352941	0.6312	1
5' TFB2M	1	0.6315	1
5' SARNP	0.75	0.6323	1
5' UQCC1	0.545455	0.6328	1
3' EYA2	0.857143	0.6334	1
5' FOCAD	0.6	0.6339	1
3' DIAPH3	0.857143	0.634	1
3' CDK14	0.666667	0.6344	1
5' UBE4B	0.6	0.6345	1
5' MYO18A	0.857143	0.6346	1
5' CRK	0.75	0.6348	1
5' ARHGAP42	1	0.6355	1
3' FHIT	0.666667	0.6357	1
5' PLCB1	0.75	0.6369	1
5' DCAF6	0.461538	0.6375	1
5' CLTC	0.666667	0.6385	1
5' PRKDC	0.545455	0.6391	1
3' WWOX	0.666667	0.6401	1
5' GON4L	0.666667	0.6403	1
5' SETD2	0.375	0.6421	1
5' RSF1	0.428571	0.6425	1
5' WNK2	0.6	0.6431	1
5' ATP11B	0.666667	0.6448	1
5' PRKCA	0.333333	0.6449	1
5' NSD1	0.9	0.7224	1
5' ZNRF3	0.642857	0.7234	1
5' ARID1A	0.777778	0.7495	1
5' NF1	0.594595	0.8124	1
3' RAB11FIP4	0.538462	0.8131	1
5' MAST2	0.538462	0.816	1
5' TBC1D22A	0.583333	0.8169	1
5' SMARCA4	0.5	0.8177	1
5' GRB2	0.636364	0.8187	1
5' FAF1	0.636364	0.8203	1
5' OLFM2	0.875	0.8203	1
5' REPS2	0.777778	0.8207	1
5' PHF21A	0.636364	0.8219	1
5' PRKAG2	0.875	0.8223	1
5' DLG1	0.666667	0.8299	1
5' TRIP12	0.666667	0.8885	1
3' BCAS3	0.444444	0.893	1
5' CUX1	0.8	0.8952	1
5' TANC2	0.421053	0.8978	1
5' WNK1	0.615385	0.899	1
3' SMYD3	0.692308	0.9015	1
5' CASC3	0.727273	0.9019	1
5' AAK1	0.75	1	1
5' AARS	0.5	1	1
5' AASDHPPT	1	1	1
5' AATF	0.571429	1	1
5' ABCA1	0.5	1	1
5' ABCC2	1	1	1
5' ABCC4	0.75	1	1
5' ABCC5	0.5	1	1
5' ABCF1	1	1	1
5' ABCG1	0.5	1	1
5' ABHD16A	1	1	1
5' ACACA	0.357143	1	1
5' ACAP2	0.4	1	1
5' ACAP3	0.75	1	1
5' ACER3	0.4	1	1
5' ACLY	0.75	1	1
5' ACSF2	1	1	1
5' ACSS1	0.666667	1	1
5' ACTG1	1	1	1
5' ACTR1A	0.5	1	1
5' ACTR2	1	1	1
5' ACTR3	0.666667	1	1
5' ADAM22	1	1	1
5' ADAMTS12	1	1	1
5' ADAMTS17	0.5	1	1
5' ADAMTS9	0.666667	1	1
5' ADAP1	0.666667	1	1
5' ADCK2	1	1	1
5' ADCY3	1	1	1
5' ADGRL3	0.5	1	1
5' ADI1	1	1	1
5' ADNP	1	1	1
5' AFAP1	1	1	1
5' AFDN	0.6	1	1
5' AFF1	0.4	1	1
5' AFF4	0.666667	1	1
5' AGAP2	1	1	1
5' AGO2	0.4	1	1
5' AGRN	0.5	1	1
5' AHI1	0.666667	1	1
5' AIG1	0.666667	1	1
5' AIP	0.666667	1	1
5' AJUBA	1	1	1
5' AK3	0.666667	1	1
5' AK4	1	1	1
5' AKAP10	1	1	1
5' AKAP6	0.666667	1	1
5' ALDH2	0.666667	1	1
5' ALDH3A2	0.75	1	1
5' ALDOA	0.666667	1	1
5' ALG14	0.75	1	1
5' ALG6	1	1	1
5' ALX4	1	1	1
5' AMFR	0.666667	1	1
5' AMOTL1	0.666667	1	1
5' ANK1	0.666667	1	1
5' ANK2	0.666667	1	1
5' ANKFY1	1	1	1
5' ANKHD1	0.133333	1	1
5' ANKIB1	1	1	1
5' ANKRD12	0.666667	1	1
5' ANKRD27	0.333333	1	1
5' ANKRD28	0.5	1	1
5' ANKRD33B	1	1	1
5' ANKRD42	1	1	1
5' ANKRD52	0.5	1	1
5' ANKS1A	1	1	1
5' ANLN	0.5	1	1
5' ANO2	1	1	1
5' ANXA4	1	1	1
5' AP1M1	0.5	1	1
5' AP1M2	0.666667	1	1
5' AP2A1	0.4	1	1
5' AP2B1	0.666667	1	1
5' AP3B1	0.75	1	1
5' AP3D1	0.6	1	1
5' APAF1	0.666667	1	1
5' APC	0.666667	1	1
5' APIP	1	1	1
5' APOLD1	1	1	1
5' APOPT1	0.4	1	1
5' APPL1	1	1	1
5' APPL2	1	1	1
5' ARAP1	0.5	1	1
5' ARFGAP2	0.666667	1	1
5' ARFGEF1	1	1	1
5' ARFGEF3	0.75	1	1
5' ARHGAP10	1	1	1
5' ARHGAP21	0.666667	1	1
5' ARHGAP31	1	1	1
5' ARHGEF18	0.5	1	1
5' ARHGEF2	1	1	1
5' ARHGEF3	0.375	1	1
5' ARID3A	0.8	1	1
5' ARID4B	0.6	1	1
5' ARID5B	1	1	1
5' ARL13B	1	1	1
5' ARL16	1	1	1
5' ARL8B	1	1	1
5' ARMC1	0.5	1	1
5' ARPP19	1	1	1
5' ASH2L	0.5	1	1
5' ASXL2	0.444444	1	1
5' ATAD1	0.4	1	1
5' ATAD5	0.5	1	1
5' ATE1	0.666667	1	1
5' ATF2	1	1	1
5' ATF3	1	1	1
5' ATF6	0.555556	1	1
5' ATF7IP	0.5	1	1
5' ATG2A	0.75	1	1
5' ATG4C	1	1	1
5' ATP11A	0.555556	1	1
5' ATP1B1	0.5	1	1
5' ATP2A2	1	1	1
5' ATP2A3	1	1	1
5' ATP2C1	0.5	1	1
5' ATP6AP1	1	1	1
5' ATP6V0A1	0.75	1	1
5' ATP8A1	0.5	1	1
5' ATP8A2	1	1	1
5' ATP8B4	0.5	1	1
5' ATR	0.75	1	1
5' ATRN	0.666667	1	1
5' ATXN10	0.625	1	1
5' ATXN2	1	1	1
5' AURKA	1	1	1
5' AXIN2	1	1	1
5' AXL	1	1	1
5' B4GALT1	0.4	1	1
5' BACH1	1	1	1
5' BAIAP2L1	0.571429	1	1
5' BAX	0.75	1	1
5' BAZ1B	0.4	1	1
5' BBX	1	1	1
5' BCAM	0.666667	1	1
5' BCAR3	1	1	1
5' BCKDHB	1	1	1
5' BCL2L1	1	1	1
5' BCL2L11	1	1	1
5' BCL7A	1	1	1
5' BDH1	1	1	1
5' BIRC6	0.333333	1	1
5' BMP2K	0.5	1	1
5' BPIFB1	1	1	1
5' BRD9	0.6	1	1
5' BRMS1L	1	1	1
5' BRSK1	1	1	1
5' BTBD1	0.6	1	1
5' BTBD2	0.428571	1	1
5' BTRC	0.666667	1	1
5' C12orf45	0.666667	1	1
5' C16orf70	0.714286	1	1
5' C19orf25	1	1	1
5' C22orf39	0.5	1	1
5' C2CD2	0.5	1	1
5' C2CD5	0.333333	1	1
5' C3	0.6	1	1
5' C6orf106	0.4	1	1
5' C9orf3	0.714286	1	1
5' CAAP1	1	1	1
5' CACHD1	0.666667	1	1
5' CACNA1D	0.666667	1	1
5' CACNA2D3	0.4	1	1
5' CACUL1	1	1	1
5' CADPS2	0.75	1	1
5' CALCB	0.666667	1	1
5' CALM3	1	1	1
5' CAMK2D	0.6	1	1
5' CAMSAP1	0.75	1	1
5' CAMSAP2	0.5	1	1
5' CAP1	1	1	1
5' CAPN1	0.666667	1	1
5' CAPN5	1	1	1
5' CAPRIN1	0.5	1	1
5' CAPS2	0.666667	1	1
5' CAPZA2	1	1	1
5' CARMIL1	0.4	1	1
5' CASP8	1	1	1
5' CBFA2T2	0.375	1	1
5' CBFB	0.411765	1	1
5' CBR4	1	1	1
5' CBX5	0.5	1	1
5' CCDC127	1	1	1
5' CCDC149	0.666667	1	1
5' CCDC61	0.666667	1	1
5' CCDC88C	1	1	1
5' CCDC91	0.625	1	1
5' CD2AP	0.3	1	1
5' CD63	1	1	1
5' CD83	1	1	1
5' CDC25A	1	1	1
5' CDC27	0.888889	1	1
5' CDC42BPA	0.6	1	1
5' CDC42BPB	0.8	1	1
5' CDC73	0.666667	1	1
5' CDCA7L	1	1	1
5' CDH3	1	1	1
5' CDK14	0.6	1	1
5' CDK5RAP1	0.666667	1	1
5' CDK5RAP2	1	1	1
5' CDK7	0.666667	1	1
5' CDK8	0.333333	1	1
5' CDKAL1	0.363636	1	1
5' CECR2	0.666667	1	1
5' CELSR1	0.333333	1	1
5' CEMIP	0.75	1	1
5' CEP135	1	1	1
5' CEP170	1	1	1
5' CEP295	0.666667	1	1
5' CEP85L	0.666667	1	1
5' CERK	1	1	1
5' CFH	1	1	1
5' CHCHD1	1	1	1
5' CHCHD3	0.4	1	1
5' CHD8	0.4	1	1
5' CHIC2	0.4	1	1
5' CHKA	0.333333	1	1
5' CHMP5	0.666667	1	1
5' CHP1	0.5	1	1
5' CHST11	1	1	1
5' CHSY3	1	1	1
5' CIAO1	0.666667	1	1
5' CIC	0.666667	1	1
5' CIT	0.666667	1	1
5' CKAP5	1	1	1
5' CLASP2	1	1	1
5' CLCF1	1	1	1
5' CLEC16A	0.25	1	1
5' CLOCK	0.666667	1	1
5' CLPTM1L	0.666667	1	1
5' CLPX	1	1	1
5' CLTA	0.5	1	1
5' CMC1	0.4	1	1
5' CMIP	0.428571	1	1
5' CMTM8	0.5	1	1
5' CNN2	0.666667	1	1
5' CNN3	1	1	1
5' CNOT9	0.5	1	1
5' COG4	0.4	1	1
5' COL16A1	0.5	1	1
5' COL6A2	0.666667	1	1
5' COMMD7	0.666667	1	1
5' COPE	1	1	1
5' COPS2	1	1	1
5' COPS7A	0.5	1	1
5' COPZ1	0.25	1	1
5' CORO1C	0.666667	1	1
5' CPAMD8	0.6	1	1
5' CPQ	1	1	1
5' CRLS1	0.5	1	1
5' CRTC1	1	1	1
5' CRYBG3	0.75	1	1
5' CSGALNACT2	1	1	1
5' CSNK1A1	0.4	1	1
5' CSNK1D	0.5	1	1
5' CSNK1E	0.5	1	1
5' CSTF3	0.666667	1	1
5' CTDSPL	0.666667	1	1
5' CTIF	0.4	1	1
5' CTNNA1	0.5	1	1
5' CTPS1	1	1	1
5' CUL3	0.666667	1	1
5' CUL4A	0.625	1	1
5' CUL5	0.666667	1	1
5' CUX2	0.666667	1	1
5' CWC25	0.444444	1	1
5' CXADR	0.5	1	1
5' CYP20A1	1	1	1
5' CYTH3	0.571429	1	1
5' DAAM1	1	1	1
5' DAB2IP	0.5	1	1
5' DAP	0.285714	1	1
5' DAP3	0.666667	1	1
5' DAPK1	1	1	1
5' DBT	1	1	1
5' DCAF5	0.5	1	1
5' DCBLD1	0.666667	1	1
5' DCP2	0.5	1	1
5' DCTN2	0.428571	1	1
5' DCUN1D4	0.5	1	1
5' DDA1	0.5	1	1
5' DDB1	1	1	1
5' DDI2	0.5	1	1
5' DDR1	1	1	1
5' DDX10	0.666667	1	1
5' DDX19B	1	1	1
5' DDX39B	0.8	1	1
5' DDX58	1	1	1
5' DDX6	1	1	1
5' DERA	0.5	1	1
5' DGCR2	0.222222	1	1
5' DGKD	0.4	1	1
5' DHCR24	1	1	1
5' DHRS12	1	1	1
5' DHRSX	1	1	1
5' DHX15	0.666667	1	1
5' DHX30	0.8	1	1
5' DHX34	0.666667	1	1
5' DHX40	0.5	1	1
5' DHX8	0.444444	1	1
5' DHX9	0.666667	1	1
5' DIXDC1	0.75	1	1
5' DLGAP4	0.5	1	1
5' DMXL1	1	1	1
5' DNAJC4	0.666667	1	1
5' DNAJC8	1	1	1
5' DNM2	0.157895	1	1
5' DNMT1	0.428571	1	1
5' DNMT3A	0.666667	1	1
5' DNMT3B	0.666667	1	1
5' DOCK9	0.5	1	1
5' DOT1L	0.444444	1	1
5' DPEP1	1	1	1
5' DPH6	0.666667	1	1
5' DPM1	0.6	1	1
5' DPP4	1	1	1
5' DPP8	1	1	1
5' DPY19L1	0.666667	1	1
5' DPY19L3	1	1	1
5' DPYD	0.5	1	1
5' DSG1	1	1	1
5' DST	0.555556	1	1
5' DTD1	0.6	1	1
5' DTNB	0.666667	1	1
5' DTWD2	1	1	1
5' DTX4	0.75	1	1
5' DUSP12	1	1	1
5' DUSP22	1	1	1
5' DYM	0.4	1	1
5' DYNC1H1	0.666667	1	1
5' DYNC1I1	1	1	1
5' DYNC1LI1	1	1	1
5' DYNC2H1	0.333333	1	1
5' DYNLRB1	1	1	1
5' DYRK1A	0.25	1	1
5' DZANK1	0.666667	1	1
5' E2F3	0.5	1	1
5' EARS2	1	1	1
5' ECSIT	0.666667	1	1
5' EDA	1	1	1
5' EDEM1	1	1	1
5' EEF1A2	1	1	1
5' EEF2K	0.333333	1	1
5' EFNA3	0.5	1	1
5' EFR3B	1	1	1
5' EFTUD2	0.5	1	1
5' EHBP1L1	0.666667	1	1
5' EHD1	0.5	1	1
5' EIF2AK4	0.4	1	1
5' EIF2B3	0.5	1	1
5' EIF3B	0.75	1	1
5' EIF3L	0.666667	1	1
5' EIF3M	1	1	1
5' ELAVL1	1	1	1
5' ELL	0.375	1	1
5' ELMO2	1	1	1
5' ELP3	0.666667	1	1
5' EML3	0.666667	1	1
5' EMP2	0.75	1	1
5' ENAH	0.666667	1	1
5' ENG	1	1	1
5' ENSA	1	1	1
5' ENTPD5	0.5	1	1
5' EPB41	1	1	1
5' EPB41L1	0.4	1	1
5' EPB41L4A	0.6	1	1
5' EPHA2	1	1	1
5' EPHB2	0.333333	1	1
5' EPS15	0.6	1	1
5' EPS15L1	0.555556	1	1
5' ERBB3	0.75	1	1
5' ERCC6L2	0.5	1	1
5' ERI3	0.666667	1	1
5' ERICH1	0.666667	1	1
5' ERLEC1	0.666667	1	1
5' ESCO1	0.5	1	1
5' ETFA	1	1	1
5' ETHE1	0.666667	1	1
5' EVC	1	1	1
5' EVI5L	1	1	1
5' EXOC1	0.5	1	1
5' EXOC4	0.333333	1	1
5' EXT2	0.666667	1	1
5' EYA2	0.6	1	1
5' FA2H	1	1	1
5' FAM104A	0.5	1	1
5' FAM114A1	0.666667	1	1
5' FAM114A2	1	1	1
5' FAM129B	0.5	1	1
5' FAM135A	0.666667	1	1
5' FAM13C	0.75	1	1
5' FAM160B1	0.666667	1	1
5' FAM172A	0.666667	1	1
5' FAM177A1	0.75	1	1
5' FAM83G	0.5	1	1
5' FAM98C	0.666667	1	1
5' FANCI	1	1	1
5' FAR2	1	1	1
5' FARP1	0.4	1	1
5' FARS2	0.75	1	1
5' FAT1	0.6	1	1
5' FBN1	0.4	1	1
5' FBXL17	1	1	1
5' FBXL18	0.5	1	1
5' FBXO31	0.666667	1	1
5' FBXW11	0.5	1	1
5' FBXW8	1	1	1
5' FDFT1	0.571429	1	1
5' FGD4	0.285714	1	1
5' FGF12	0.5	1	1
5' FGGY	0.4	1	1
5' FHOD3	0.571429	1	1
5' FIP1L1	0.75	1	1
5' FLOT2	0.4	1	1
5' FNBP4	0.75	1	1
5' FNDC3B	0.3	1	1
5' FNIP2	0.666667	1	1
5' FNTB	0.666667	1	1
5' FOSL2	1	1	1
5' FOXJ3	0.6	1	1
5' FOXN3	0.666667	1	1
5' FOXO1	0.666667	1	1
5' FOXP1	0.5	1	1
5' FOXP4	1	1	1
5' FREM2	1	1	1
5' FRMD4A	0.5	1	1
5' FRMD4B	0.75	1	1
5' FRMD8	0.333333	1	1
5' FUT10	0.5	1	1
5' FXR2	1	1	1
5' FYTTD1	0.8	1	1
5' FZR1	0.5	1	1
5' GAB2	0.333333	1	1
5' GABRP	0.75	1	1
5' GALNT18	0.428571	1	1
5' GAPDH	0.666667	1	1
5' GAS2L3	0.75	1	1
5' GAS7	0.5	1	1
5' GBE1	1	1	1
5' GBF1	0.4	1	1
5' GCN1	0.666667	1	1
5' GDE1	1	1	1
5' GDI2	0.666667	1	1
5' GFM1	0.666667	1	1
5' GGA2	1	1	1
5' GIGYF2	0.375	1	1
5' GINM1	1	1	1
5' GLB1	0.666667	1	1
5' GLG1	0.428571	1	1
5' GLOD4	1	1	1
5' GMDS	0.75	1	1
5' GMEB2	1	1	1
5' GNA11	1	1	1
5' GNA13	0.428571	1	1
5' GNAI3	0.4	1	1
5' GNAS	0.4	1	1
5' GNB1	0.75	1	1
5' GNE	0.666667	1	1
5' GNPAT	0.666667	1	1
5' GNPTAB	0.4	1	1
5' GNS	0.5	1	1
5' GOLGA5	0.666667	1	1
5' GOLIM4	0.428571	1	1
5' GOLPH3	0.666667	1	1
5' GOLPH3L	0.666667	1	1
5' GORASP2	0.75	1	1
5' GOSR1	0.8	1	1
5' GPAT3	0.666667	1	1
5' GPC3	1	1	1
5' GPD1L	1	1	1
5' GPI	1	1	1
5' GPLD1	0.666667	1	1
5' GPR158	1	1	1
5' GPR89B	0.666667	1	1
5' GRAMD1A	1	1	1
5' GRB10	0.428571	1	1
5' GRID1	0.75	1	1
5' GRIK2	0.5	1	1
5' GRK3	0.285714	1	1
5' GRTP1	0.5	1	1
5' GSAP	0.666667	1	1
5' GSE1	0.428571	1	1
5' GSR	0.5	1	1
5' GTF2IRD1	0.5	1	1
5' GTPBP2	0.666667	1	1
5' GXYLT1	1	1	1
5' HACD3	1	1	1
5' HADH	1	1	1
5' HARBI1	1	1	1
5' HAUS8	0.6	1	1
5' HDAC7	1	1	1
5' HEATR6	0.285714	1	1
5' HERC4	0.666667	1	1
5' HGD	1	1	1
5' HGSNAT	0.666667	1	1
5' HID1	1	1	1
5' HIPK2	0.25	1	1
5' HIST1H2AC	0.6	1	1
5' HIST4H4	0.285714	1	1
5' HM13	0.666667	1	1
5' HMGCS1	1	1	1
5' HNF1B	1	1	1
5' HNRNPA2B1	0.75	1	1
5' HNRNPR	1	1	1
5' HNRNPUL2	1	1	1
5' HOOK1	1	1	1
5' HOOK2	0.5	1	1
5' HPS4	1	1	1
5' HSPG2	0.8	1	1
5' HTT	0.714286	1	1
5' IFFO2	1	1	1
5' IFT74	0.75	1	1
5' IFT81	0.75	1	1
5' IGF2BP3	1	1	1
5' IGF2R	0.4	1	1
5' IGHMBP2	0.5	1	1
5' IKBKB	0.5	1	1
5' IL12RB2	0.666667	1	1
5' IL13RA1	1	1	1
5' IL1RAP	0.666667	1	1
5' ILF3	0.5	1	1
5' ILVBL	1	1	1
5' INO80	1	1	1
5' INPP5B	0.75	1	1
5' INPP5F	1	1	1
5' INSR	0.4	1	1
5' INTS1	1	1	1
5' INTS11	0.5	1	1
5' INTS4	0.285714	1	1
5' IPO11	1	1	1
5' IPO7	0.75	1	1
5' IPPK	0.666667	1	1
5' IQCH	1	1	1
5' IQGAP1	0.428571	1	1
5' IRAK2	0.5	1	1
5' ITCH	0.214286	1	1
5' ITGA2	0.333333	1	1
5' ITGA6	1	1	1
5' ITGA9	0.833333	1	1
5' ITGB4	0.222222	1	1
5' ITGB5	0.6	1	1
5' ITPR1	1	1	1
5' ITPR2	0.333333	1	1
5' JADE2	1	1	1
5' JAK2	0.666667	1	1
5' JDP2	0.666667	1	1
5' JUP	0.4	1	1
5' KANSL1	0.428571	1	1
5' KANSL3	0.666667	1	1
5' KAT6B	0.6	1	1
5' KAZN	0.5	1	1
5' KCMF1	0.5	1	1
5' KCNK5	1	1	1
5' KCNMB4	0.428571	1	1
5' KCNN3	0.666667	1	1
5' KCNQ1	0.571429	1	1
5' KDM2B	0.285714	1	1
5' KDM4A	0.4	1	1
5' KDM4B	0.666667	1	1
5' KDM4C	0.285714	1	1
5' KDM5B	0.8	1	1
5' KHDRBS3	0.75	1	1
5' KIAA0319L	0.444444	1	1
5' KIAA0930	1	1	1
5' KIDINS220	0.666667	1	1
5' KIF16B	0.5	1	1
5' KIF1B	0.428571	1	1
5' KIF26B	1	1	1
5' KIF27	1	1	1
5' KIF3B	0.75	1	1
5' KIF5B	0.666667	1	1
5' KLF6	1	1	1
5' KLF7	0.666667	1	1
5' KLHL18	1	1	1
5' KLHL24	0.666667	1	1
5' KLHL26	0.666667	1	1
5' KMT2D	0.5	1	1
5' KNTC1	0.666667	1	1
5' KPNA1	1	1	1
5' KPNA4	0.8	1	1
5' KPNA6	0.25	1	1
5' KREMEN1	0.5	1	1
5' KRI1	1	1	1
5' L3MBTL2	1	1	1
5' L3MBTL4	1	1	1
5' LAMA2	0.5	1	1
5' LAMA5	0.333333	1	1
5' LAMC2	0.75	1	1
5' LARGE1	0.375	1	1
5' LARP1B	1	1	1
5' LARP4B	0.5	1	1
5' LARS2	0.666667	1	1
5' LASP1	1	1	1
5' LDAH	1	1	1
5' LDLR	0.363636	1	1
5' LDLRAD3	0.8	1	1
5' LGR6	0.666667	1	1
5' LIMCH1	0.666667	1	1
5' LIMK2	1	1	1
5' LIN52	0.666667	1	1
5' LLGL2	0.285714	1	1
5' LMAN2	0.571429	1	1
5' LMAN2L	0.75	1	1
5' LMBRD1	1	1	1
5' LNX1	0.5	1	1
5' LONP1	0.5	1	1
5' LONP2	0.5	1	1
5' LPCAT2	1	1	1
5' LPCAT4	1	1	1
5' LRBA	0.25	1	1
5' LRCH3	1	1	1
5' LRIG3	0.285714	1	1
5' LRP1	0.307692	1	1
5' LRP12	0.25	1	1
5' LRP2	1	1	1
5' LRP3	0.666667	1	1
5' LRP6	0.5	1	1
5' LRRC1	0.375	1	1
5' LSM12	1	1	1
5' LSM4	0.5	1	1
5' LTA4H	0.666667	1	1
5' LTBP3	1	1	1
5' LUC7L	0.285714	1	1
5' LYPLA1	1	1	1
5' LYST	0.5	1	1
5' MACF1	0.75	1	1
5' MACROD2	0.333333	1	1
5' MAD1L1	0.666667	1	1
5' MAL2	0.75	1	1
5' MAML3	0.375	1	1
5' MAN2B1	0.666667	1	1
5' MAP1B	0.5	1	1
5' MAP2K4	0.5	1	1
5' MAP2K5	0.75	1	1
5' MAP3K3	0.5	1	1
5' MAP4	0.571429	1	1
5' MAP4K3	0.5	1	1
5' MAP4K4	0.285714	1	1
5' MAP4K5	0.428571	1	1
5' MAP7	0.222222	1	1
5' MAPK1	0.375	1	1
5' MAPKAPK3	1	1	1
5' MAPKAPK5	0.444444	1	1
5' MARCH6	0.75	1	1
5' MARCH9	0.5	1	1
5' MARVELD2	1	1	1
5' MAX	0.666667	1	1
5' MB21D2	1	1	1
5' MBD3	0.666667	1	1
5' MBNL1	1	1	1
5' MBOAT1	0.666667	1	1
5' MBOAT2	0.5	1	1
5' MBTD1	1	1	1
5' MBTPS1	1	1	1
5' MCL1	0.666667	1	1
5' MCM6	1	1	1
5' MED13L	0.461538	1	1
5' MED16	1	1	1
5' MED20	0.4	1	1
5' MED23	0.75	1	1
5' MED25	0.5	1	1
5' MED29	1	1	1
5' MEIS2	0.75	1	1
5' MELK	1	1	1
5' MET	0.6	1	1
5' METTL16	0.5	1	1
5' MFSD2A	1	1	1
5' MFSD6	0.6	1	1
5' MGA	0.428571	1	1
5' MGMT	1	1	1
5' MGRN1	0.333333	1	1
5' MGST1	1	1	1
5' MIB1	0.5	1	1
5' MICU1	0.5	1	1
5' MIGA1	1	1	1
5' MINOS1	0.666667	1	1
5' MKNK2	0.5	1	1
5' MKRN1	0.333333	1	1
5' MLLT3	0.333333	1	1
5' MMP15	0.666667	1	1
5' MNAT1	0.4	1	1
5' MOK	0.5	1	1
5' MON2	1	1	1
5' MPDZ	0.666667	1	1
5' MPHOSPH9	0.6	1	1
5' MROH1	0.428571	1	1
5' MRPL42	1	1	1
5' MRPS35	0.714286	1	1
5' MSRA	0.666667	1	1
5' MTA2	0.666667	1	1
5' MTAP	0.8	1	1
5' MTF1	0.5	1	1
5' MTFR1	1	1	1
5' MTG1	1	1	1
5' MTOR	0.333333	1	1
5' MTRR	1	1	1
5' MTUS1	0.5	1	1
5' MUC1	1	1	1
5' MYCBP2	0.333333	1	1
5' MYH11	1	1	1
5' MYO19	1	1	1
5' MYO6	0.666667	1	1
5' MYO9B	0.5	1	1
5' NAA15	0.75	1	1
5' NAA35	1	1	1
5' NAP1L4	1	1	1
5' NAPG	1	1	1
5' NARF	0.666667	1	1
5' NAV1	0.666667	1	1
5' NAV2	0.5	1	1
5' NBEAL1	0.75	1	1
5' NBEAL2	1	1	1
5' NBPF26	0.5	1	1
5' NCEH1	0.666667	1	1
5' NCKAP1	1	1	1
5' NCOA6	0.8	1	1
5' NCOR2	0.625	1	1
5' NDC1	1	1	1
5' NEDD9	0.666667	1	1
5' NEK7	1	1	1
5' NELFB	1	1	1
5' NEMF	0.6	1	1
5' NFE2L1	0.857143	1	1
5' NFE2L2	0.571429	1	1
5' NFE2L3	0.666667	1	1
5' NFIA	0.5	1	1
5' NFIB	0.5	1	1
5' NFIC	0.625	1	1
5' NFKBIE	1	1	1
5' NFRKB	0.666667	1	1
5' NFX1	0.363636	1	1
5' NFYA	1	1	1
5' NHSL1	0.5	1	1
5' NIPBL	0.454545	1	1
5' NKAIN3	1	1	1
5' NLN	1	1	1
5' NME7	1	1	1
5' NMNAT3	1	1	1
5' NNT	1	1	1
5' NOL12	0.666667	1	1
5' NOL9	0.75	1	1
5' NOMO1	1	1	1
5' NOMO3	0.666667	1	1
5' NOTCH3	1	1	1
5' NPAS2	0.666667	1	1
5' NPC2	1	1	1
5' NPHP4	1	1	1
5' NPLOC4	0.5	1	1
5' NPM1	1	1	1
5' NPTN	0.666667	1	1
5' NPTXR	0.75	1	1
5' NRBF2	0.666667	1	1
5' NRP2	0.4	1	1
5' NSD2	0.6	1	1
5' NSF	1	1	1
5' NSL1	1	1	1
5' NSRP1	0.5	1	1
5' NUAK2	0.5	1	1
5' NUBPL	1	1	1
5' NUDT3	0.333333	1	1
5' NUF2	1	1	1
5' NUMA1	0.333333	1	1
5' NUMB	0.5	1	1
5' NUP153	0.571429	1	1
5' NUP188	0.75	1	1
5' NUP205	0.5	1	1
5' NUP214	0.75	1	1
5' NUP85	0.6	1	1
5' NXN	0.666667	1	1
5' OBSCN	0.6	1	1
5' OGT	0.666667	1	1
5' OLA1	0.5	1	1
5' OPA3	0.666667	1	1
5' OSBP2	1	1	1
5' OSBPL1A	0.4	1	1
5' OSBPL5	0.5	1	1
5' OSBPL9	0.428571	1	1
5' OSGIN2	0.666667	1	1
5' OXCT1	0.666667	1	1
5' P3H4	1	1	1
5' P4HA1	0.5	1	1
5' P4HB	0.333333	1	1
5' PACS2	0.666667	1	1
5' PAIP1	1	1	1
5' PAK2	0.666667	1	1
5' PAN3	0.571429	1	1
5' PAPPA2	0.666667	1	1
5' PAPSS2	0.5	1	1
5' PARD3B	1	1	1
5' PARN	1	1	1
5' PARVA	1	1	1
5' PBRM1	0.5	1	1
5' PCGF3	0.666667	1	1
5' PCLO	1	1	1
5' PCMT1	1	1	1
5' PCMTD2	0.8	1	1
5' PCNT	0.5	1	1
5' PCNX1	0.5	1	1
5' PCNX2	0.5	1	1
5' PCNX3	0.666667	1	1
5' PCTP	0.666667	1	1
5' PDCD2L	1	1	1
5' PDCD6IP	1	1	1
5' PDE9A	0.75	1	1
5' PDGFB	1	1	1
5' PDHX	0.333333	1	1
[truncated: 1,977 more rows]
