# Supplementary material for: Genetic fusions favor tumorigenesis through degron loss in oncogenes
Source: Nat Commun. 2021 Nov 18;12:6704. doi: 10.1038/s41467-021-26871-y (PMC8602260; doi:10.1038/s41467-021-26871-y)
Supplement: Supplementary file 6 — Dataset 4 [file 41467_2021_26871_MOESM6_ESM.xlsx]

## Sheet: Table_S5
fusion	protein	t-value	p-value	q-value
5' ERBB2	HER2_pY1248	10.7877	6.70303e-27	2.38896e-23
5' ERBB2	HER2	10.1818	3.65396e-24	6.51136e-21
5' EGFR	EGFR	5.53021	3.32506e-08	3.95017e-05
5' ERBB2	EGFR_pY1068	5.21513	1.89461e-07	0.000159876
3' RET	X1433EPSILON	-5.18362	2.24293e-07	0.000159876
5' MAST2	CIAP	4.91132	9.27139e-07	0.00055072
3' RET	ARAF_pS299	-4.63385	3.6604e-06	0.00186367
5' CCDC6	X1433EPSILON	-4.59307	4.45151e-06	0.00198315
3' RET	NRAS	-4.46583	8.11306e-06	0.00321277
3' RET	ERK2	4.11647	3.89553e-05	0.0138837
3' RET	P38_pT180Y182	4.07245	4.70839e-05	0.0152552
5' RAF1	CDK1	-3.91731	9.04745e-05	0.0266738
3' RET	X4EBP1_pT37T46	3.89971	9.72949e-05	0.0266738
5' EGFR	EGFR_pY1068	3.85728	0.000115783	0.0276369
5' CCDC6	ARAF_pS299	-3.84313	0.000122655	0.0276369
3' RET	KU80	3.8403	0.000124071	0.0276369
3' RET	ADAR1	-3.82144	0.000135882	0.0284872
5' NF1	P70S6K	3.69834	0.000218831	0.0417632
3' RET	SCD1	-3.69395	0.000222644	0.0417632
3' RET	ACVRL1	-3.59805	0.000323038	0.0575654
3' RET	PKCPANBETAII_pS660	3.58238	0.000343007	0.0582132
3' RET	HEREGULIN	-3.50918	0.000452581	0.0713761
3' RET	ANNEXIN1	3.50449	0.00046062	0.0713761
3' RET	YAP_pS127	3.43567	0.000594847	0.0883348
5' MED26	SRC_pY416	3.41715	0.00063674	0.0904248
5' MED26	HER2_pY1248	3.4075	0.000659664	0.0904248
5' MAST2	G6PD	3.32027	0.000904338	0.119373
3' RET	X1433BETA	-3.2996	0.000973532	0.122114
5' MAST2	BIM	3.29385	0.000993634	0.122114
5' MED26	ASNS	3.28203	0.00103616	0.123096
5' VPS13B	X4EBP1	3.26706	0.00109245	0.123365
3' RET	MAPK_pT202Y204	-3.26314	0.00110765	0.123365
5' MAST2	PRDX1	3.23997	0.00120154	0.129766
5' NF1	CYCLINE2	3.20412	0.00136142	0.138518
5' RAF1	FIBRONECTIN	3.1989	0.00138625	0.138518
5' CCDC6	NRAS	-3.19622	0.00139917	0.138518
3' RET	PDCD4	3.1453	0.00166679	0.160552
5' CCDC6	ADAR1	-3.12498	0.00179837	0.168668
3' RET	SMAD3	3.09377	0.00198482	0.181382
5' VPS13B	NFKBP65_pS536	3.07352	0.00212438	0.189282
3' RET	P70S6K_pT389	-3.03203	0.00243885	0.207745
5' ERG	PCNA	-3.01323	0.00259494	0.207745
5' EML4	TRANSGLUTAMINASE	3.00846	0.00263598	0.207745
5' MED26	AR	-3.00734	0.00264574	0.207745
5' VPS13B	P27_pT157	3.00608	0.00265668	0.207745
5' NF1	PAI1	3.00327	0.00268133	0.207745
3' RET	PI3KP85	2.98364	0.00285914	0.216808
5' VPS13B	HER3_pY1298	-2.92546	0.00345162	0.253532
5' PPP1R12A	RICTOR	2.92239	0.00348572	0.253532
5' RAF1	CMET_pY1235	-2.91027	0.00362358	0.258289
5' CCDC6	MAPK_pT202Y204	-2.87149	0.00409887	0.28177
5' CCDC6	SMAD3	2.87054	0.00411112	0.28177
5' CCDC6	TTF1	2.85989	0.00427271	0.286271
5' EGFR	PREX1	2.85354	0.00433743	0.286271
3' RET	FOXM1	-2.8402	0.00452281	0.289272
5' VPS13B	PKCALPHA	-2.83796	0.00455466	0.289272
5' EML4	BAD_pS112	2.83263	0.00463107	0.289272
5' VPS13B	BIM	-2.82739	0.00470756	0.289272
5' VPS13B	PKCALPHA_pS657	-2.79967	0.00513075	0.309932
5' VPS13B	BCL2	-2.78668	0.00534083	0.317245
5' CCDC6	FOXM1	-2.77549	0.00552793	0.322976
5' MED26	EIF4E	2.76352	0.00573448	0.32463
5' CCDC6	P38_pT180Y182	2.7633	0.00573841	0.32463
5' PPP1R12A	XBP1	2.7541	0.005902	0.328667
5' EML4	PKCPANBETAII_pS660	2.74811	0.00601082	0.329484
5' ERG	RAD51	-2.73834	0.00619206	0.329484
5' CCDC6	HEREGULIN	-2.73417	0.00627092	0.329484
5' ERG	STAT3_pY705	2.73336	0.00628645	0.329484
5' CCDC6	PI3KP85	2.71602	0.00662496	0.339294
3' RET	TTF1	2.71544	0.00666402	0.339294
3' RET	AKT	2.69314	0.00709677	0.349113
5' RAF1	ANNEXINVII	-2.68837	0.00719877	0.349113
5' CCDC6	YAP_pS127	2.68403	0.00729273	0.349113
5' ARID1A	CYCLIND1	2.68305	0.00731423	0.349113
3' RET	MEK1_pS217S221	-2.68157	0.00734666	0.349113
3' RET	PAXILLIN	2.66184	0.00779087	0.363135
5' EML4	SHC_pY317	2.65821	0.00787529	0.363135
5' CCDC6	ANNEXIN1	2.65213	0.00801844	0.363135
3' RET	X53BP1	2.65083	0.0080493	0.363135
5' VPS13B	XBP1	2.63671	0.00839166	0.373849
5' MED26	HER2	2.61683	0.00889585	0.38427
5' CCDC6	PRAS40_pT246	-2.61493	0.00894565	0.38427
5' ERG	MYH11	2.6148	0.00894904	0.38427
3' RET	TUBERIN_pT1462	-2.61063	0.00905874	0.38435
5' ZDHHC17	MTOR	2.59478	0.00948663	0.394071
3' RET	ANNEXINVII	-2.59021	0.00961347	0.394071
5' MED26	MYH11	-2.58705	0.00970217	0.394071
5' CCDC6	KU80	2.58547	0.0097465	0.394071
5' EML4	EEF2K	2.58215	0.00984072	0.394071
5' MAST2	CRAF	2.57756	0.00997213	0.394896
5' MED26	DJ1	2.53637	0.0112243	0.425391
3' RET	RB_pS807S811	2.53537	0.0112566	0.425391
3' RET	CHK2_pT68	-2.53257	0.0113465	0.425391
3' RET	SMAC	-2.5297	0.0114398	0.425391
5' MED26	ERALPHA	-2.52882	0.0114685	0.425391
5' CCDC6	ACVRL1	-2.52798	0.0114958	0.425391
5' EPS15L1	P27	2.52069	0.0117368	0.425391
5' ERBB2	SMAD3	-2.52036	0.0117478	0.425391
5' MAST2	CASPASE3	-2.52995	0.0118164	0.425391
5' VPS13B	FOXO3A	-2.48481	0.0129875	0.462874
5' CCDC6	PKCPANBETAII_pS660	2.47907	0.0131982	0.465393
5' ERBB2	MEK1	2.47244	0.0134452	0.465393
5' CCDC6	RAPTOR	2.47232	0.0134499	0.465393
5' MED26	CD20	-2.45774	0.0140079	0.468381
5' VPS13B	CD31	-2.45559	0.0140918	0.468381
5' VPS13B	NF2	-2.45453	0.0141335	0.468381
5' ANK3	STAT5ALPHA	2.45342	0.0141771	0.468381
5' CCDC6	SCD1	-2.453	0.0141934	0.468381
3' RET	RAB25	-2.43119	0.0150764	0.490218
5' CCDC6	X4EBP1_pT37T46	2.4299	0.0151302	0.490218
5' CCDC6	X1433BETA	-2.41165	0.0159085	0.510791
5' VPS13B	NCADHERIN	-2.40756	0.0160878	0.511936
5' MAST2	INPP4B	2.39774	0.0165249	0.521193
5' VPS13B	P53	-2.38808	0.0169655	0.530394
5' EML4	PDK1_pS241	2.37929	0.0173753	0.536391
5' MED26	P21	-2.37753	0.0174583	0.536391
5' EPS15L1	ACETYLATUBULINLYS40	2.35641	0.0184824	0.563003
5' CCDC6	PEA15	2.35303	0.0186514	0.563334
5' MED26	MEK1	2.34494	0.0190604	0.570852
5' EPS15L1	CMYC	2.3406	0.0192836	0.572723
5' ZDHHC17	STAT5ALPHA	2.33443	0.019604	0.577428
5' ZDHHC17	XBP1	-2.3253	0.0200873	0.586812
5' ERG	YAP	2.31167	0.0208273	0.595718
5' ANK3	S6_pS240S244	2.31158	0.0208326	0.595718
5' RAF1	P90RSK_pT359S363	2.31047	0.0208936	0.595718
3' RET	P38MAPK	2.30672	0.021102	0.596842
5' VPS13B	CYCLINB1	2.30243	0.021343	0.596842
5' PPP1R12A	RBM15	-2.30079	0.0214354	0.596842
5' EPS15L1	RB_pS807S811	2.28733	0.0222092	0.608453
5' ERBB2	CMET_pY1235	-2.2865	0.0222576	0.608453
5' ANK3	LCK	2.28467	0.0223646	0.608453
5' CCDC6	TUBERIN_pT1462	-2.27524	0.0229246	0.618964
5' MAST2	BAD_pS112	2.2607	0.023811	0.63559
5' ARID1A	PDCD4	-2.25932	0.023897	0.63559
3' RET	AMPKALPHA	2.24967	0.024504	0.646904
5' ZDHHC17	CRAF	2.23733	0.0252994	0.65026
3' RET	SHC_pY317	2.23621	0.0253726	0.65026
5' ZDHHC17	SMAC	2.23254	0.0256141	0.65026
5' MAST2	VEGFR2	2.22839	0.0258894	0.65026
5' ZDHHC17	PAI1	-2.22471	0.0261357	0.65026
5' CCDC6	CRAF	2.22314	0.0262415	0.65026
5' ERBB2	ACC_pS79	2.22024	0.0264373	0.65026
5' CCDC6	ERK2	2.21845	0.0265589	0.65026
5' EPS15L1	JNK2	-2.21547	0.0267629	0.65026
5' ERG	SRC	2.21062	0.0270971	0.65026
5' EPS15L1	EEF2K	-2.21023	0.0271247	0.65026
5' MED26	GAB2	-2.20932	0.0271874	0.65026
5' ZDHHC17	TUBERIN	2.20918	0.0271978	0.65026
5' RAF1	TUBERIN_pT1462	2.20675	0.0273671	0.65026
5' CCDC6	TSC1	2.20674	0.0273678	0.65026
5' MED26	ANNEXIN1	2.20187	0.0277103	0.654035
3' RET	PR	-2.19085	0.0284988	0.668221
5' EPS15L1	S6	-2.17868	0.0293921	0.684664
5' CCDC6	P90RSK_pT359S363	-2.16623	0.0303303	0.70193
3' RET	TSC1	2.16008	0.0308033	0.708276
5' ANK3	GATA3	2.15021	0.0315762	0.721394
5' CCDC6	MEK1_pS217S221	-2.1371	0.0326273	0.737546
3' RET	BRCA2	-2.12932	0.0332722	0.737546
5' MAST2	HSP70	-2.1283	0.0333507	0.737546
5' CCDC6	PR	-2.12536	0.0335951	0.737546
5' MAST2	JNK2	2.12368	0.033735	0.737546
5' PPP1R12A	CAVEOLIN1	2.12131	0.0339344	0.737546
5' WNK1	CLAUDIN7	-2.11887	0.0341399	0.737546
3' RET	X4EBP1	-2.11553	0.034423	0.737546
5' MED26	ACC1	2.11527	0.0344455	0.737546
5' ZDHHC17	X53BP1	2.11266	0.0346685	0.737546
5' MED26	CYCLINB1	2.11216	0.0347114	0.737546
5' EML4	AMPK_pT172	2.10934	0.034954	0.737546
3' RET	GATA3	-2.10799	0.0350705	0.737546
5' EML4	AR	2.10672	0.0351804	0.737546
5' MED26	PAI1	2.10089	0.0356893	0.743841
5' ANK3	PI3KP85	2.0957	0.0361481	0.749021
3' RET	HER2	2.08861	0.0367819	0.755245
5' ERG	GSK3ALPHABETA_pS21S9	2.08761	0.0368723	0.755245
3' RET	PEA15	2.08438	0.0371649	0.756162
5' ZDHHC17	P21	-2.08245	0.0373413	0.756162
5' CCDC6	PDK1_pS241	2.07975	0.0375884	0.756328
5' ERBB2	RICTOR_pT1135	-2.07773	0.037774	0.756328
5' MAST2	CAVEOLIN1	-2.07251	0.0382581	0.761271
5' EML4	TFRC	-2.07047	0.038448	0.761271
5' ZDHHC17	ETS1	-2.06796	0.0386835	0.761702
5' ARID1A	MIG6	2.05828	0.0396034	0.765442
3' RET	EEF2K	2.05785	0.0396451	0.765442
3' RET	P62LCKLIGAND	-2.05533	0.0398873	0.765442
5' WNK1	IRS1	2.05354	0.0400604	0.765442
3' RET	CRAF	2.05301	0.0401118	0.765442
5' MAST2	BRAF	2.05187	0.040223	0.765442
5' WNK1	NFKBP65_pS536	2.04699	0.0406996	0.765442
5' ERBB2	ACETYLATUBULINLYS40	2.04609	0.0407887	0.765442
3' RET	EEF2	2.04591	0.0408064	0.765442
5' VPS13B	INPP4B	-2.03887	0.0415038	0.771168
3' RET	NDRG1_pT346	-2.03435	0.0419574	0.771168
5' CCDC6	ANNEXINVII	-2.03428	0.0419645	0.771168
5' NF1	P70S6K_pT389	2.03415	0.0419772	0.771168
5' ERBB2	XRCC1	-2.0259	0.0428168	0.77344
5' EML4	TTF1	2.02586	0.0428839	0.77344
5' VPS13B	SCD1	-2.02501	0.0429078	0.77344
3' RET	HER3	-2.02344	0.0430692	0.77344
5' RAF1	PRDX1	-2.02231	0.0431859	0.77344
3' RET	FOXO3A	-2.0101	0.0444628	0.791731
5' CCDC6	CRAF_pS338	-2.00832	0.0446515	0.791731
3' RET	CRAF_pS338	-1.9978	0.0457809	0.799404
5' MAST2	CASPASE7CLEAVEDD198	1.9971	0.0458569	0.799404
5' MAST2	TTF1	-1.98871	0.0468407	0.799404
5' MED26	TUBERIN_pT1462	-1.98555	0.0471264	0.799404
5' ARID1A	PAI1	1.98513	0.0471729	0.799404
5' ARID1A	P90RSK	1.98255	0.0474603	0.799404
5' TBCD	EEF2	1.98174	0.0475514	0.799404
5' EML4	XBP1	1.98171	0.0475544	0.799404
5' ERBB2	X4EBP1_pS65	-1.98142	0.0475872	0.799404
5' PPP1R12A	STAT3_pY705	1.97924	0.0478313	0.799404
5' VPS13B	RAD50	-1.97727	0.0480544	0.799404
5' MED26	P38MAPK	1.97468	0.0483479	0.799404
5' PPP1R12A	PR	1.97323	0.0485127	0.799404
5' CCDC6	CLAUDIN7	-1.96991	0.0488917	0.799404
5' VPS13B	X4EBP1_pT37T46	1.96632	0.0493051	0.799404
3' RET	PDK1_pS241	1.96625	0.0493129	0.799404
5' CCDC6	CHK2_pT68	-1.96531	0.0494217	0.799404
5' MAST2	S6	1.96477	0.0494846	0.799404
5' EML4	PTEN	1.96465	0.0494978	0.799404
5' NF1	STAT5ALPHA	-1.96328	0.049657	0.799404
3' RET	CD49B	-1.96087	0.049937	0.799404
5' VPS13B	HEREGULIN	1.96017	0.0500188	0.799404
5' ZDHHC17	KU80	1.95417	0.0507246	0.807064
3' RET	MTOR	1.95225	0.0509522	0.807083
5' ZDHHC17	PDK1_pS241	1.9339	0.05317	0.838487
5' MAST2	KU80	1.93132	0.0534882	0.839788
5' EPS15L1	HSP70	1.92802	0.0538964	0.84245
5' NF1	NFKBP65_pS536	-1.92615	0.0541305	0.84245
5' ANK3	PKCPANBETAII_pS660	1.91906	0.0550214	0.846267
5' EML4	ARAF_pS299	1.91438	0.0556165	0.846267
5' ZDHHC17	BCLXL	-1.91437	0.0556175	0.846267
5' ERBB2	CYCLINB1	1.91419	0.0556409	0.846267
5' ANK3	X4EBP1	-1.91328	0.0557562	0.846267
5' CCDC6	AKT_pT308	-1.91294	0.0558005	0.846267
5' MED26	VEGFR2	1.91089	0.0560634	0.846652
3' RET	P27_pT157	-1.90799	0.056437	0.848698
5' VPS13B	JNK_pT183Y185	-1.90446	0.0568948	0.851873
5' ZDHHC17	DVL3	1.90269	0.0571261	0.851873
5' ZDHHC17	MEK1	1.89236	0.058488	0.868546
5' TBCD	HER3	1.88296	0.0597507	0.883616
3' RET	AKT_pS473	-1.87585	0.060722	0.891477
5' ARID1A	EEF2	1.87541	0.0607825	0.891477
5' EPS15L1	PKCALPHA	-1.87093	0.061401	0.896858
5' NF1	IRS1	-1.86856	0.0617293	0.897972
5' ANK3	ATM	1.86573	0.0621247	0.899074
5' ERBB2	PARP1	-1.86575	0.0623096	0.899074
5' TBCD	PAXILLIN	1.86258	0.0625671	0.89915
3' RET	DIRAS3	-1.8581	0.0632014	0.899653
5' EPS15L1	NDRG1_pT346	1.85527	0.0636036	0.899653
5' NF1	SMAD1	1.85515	0.0636207	0.899653
3' RET	PDK1	-1.85393	0.0637952	0.899653
5' CCDC6	NOTCH1	-1.85225	0.0640358	0.899653
5' WNK1	ATM	1.8515	0.0641439	0.899653
5' EML4	TIGAR	-1.84694	0.0648022	0.899653
5' EPS15L1	PTEN	-1.8412	0.0656383	0.899653
3' RET	X1433ZETA	1.84115	0.0656463	0.899653
5' EML4	TSC1	1.83846	0.0660413	0.899653
3' RET	P53	-1.83472	0.0665942	0.899653
5' ARID1A	CIAP	-1.83417	0.0666758	0.899653
5' RAF1	PCNA	-1.83332	0.0668018	0.899653
5' ERBB2	NOTCH1	1.83113	0.0671273	0.899653
5' CCDC6	CDK1	-1.82835	0.0675434	0.899653
5' CCDC6	BRCA2	-1.82808	0.0675921	0.899653
5' CCDC6	FOXO3A	-1.82711	0.0677294	0.899653
5' EPS15L1	ARID1A	1.82695	0.0678075	0.899653
5' VPS13B	X4EBP1_pT70	1.82536	0.0679934	0.899653
5' CCDC6	SMAC	-1.82101	0.068652	0.899653
3' RET	BECLIN	-1.82098	0.0686571	0.899653
5' TBCD	FASN	1.82093	0.0686639	0.899653
5' EML4	CLAUDIN7	-1.8201	0.0687903	0.899653
5' ERG	PKCALPHA_pS657	1.82001	0.0688041	0.899653
5' VPS13B	RB_pS807S811	1.8193	0.0689128	0.899653
5' ANK3	MTOR_pS2448	1.8156	0.069478	0.901948
3' RET	PTEN	1.81484	0.0695948	0.901948
5' CCDC6	CYCLINE2	-1.8125	0.0699558	0.903342
5' MED26	CYCLIND1	-1.80995	0.0703497	0.903396
5' CCDC6	X53BP1	1.80816	0.0706285	0.903396
3' RET	CYCLINE2	-1.80757	0.0707204	0.903396
5' EML4	PAI1	-1.80348	0.0713593	0.903934
5' RAF1	CMYC	-1.80132	0.0716996	0.903934
5' ERG	FASN	-1.80078	0.0717845	0.903934
5' MED26	X53BP1	-1.80008	0.0718944	0.903934
5' TBCD	PCADHERIN	1.79922	0.0720306	0.903934
5' WNK1	IGFBP2	-1.79615	0.0725185	0.906863
5' EGFR	PKCDELTA_pS664	1.79376	0.072899	0.908434
5' EGFR	NOTCH1	1.79001	0.0735001	0.912733
5' EGFR	BAK	-1.78324	0.0745942	0.921755
5' MAST2	CKIT	-1.78201	0.0747951	0.921755
5' VPS13B	AR	-1.7805	0.075041	0.921755
5' ANK3	SYK	1.77815	0.0754264	0.921755
5' MAST2	PREX1	1.77582	0.0758105	0.921755
5' EML4	AKT_pS473	1.76965	0.0768336	0.921755
5' NF1	CRAF	1.76955	0.0768492	0.921755
5' CCDC6	LCK	1.76701	0.0772744	0.921755
5' VPS13B	GAB2	1.76608	0.0774293	0.921755
5' VPS13B	ERK2	-1.76497	0.0776159	0.921755
5' ERG	TSC1	1.76459	0.0776808	0.921755
5' MED26	YB1_pS102	-1.76413	0.0777576	0.921755
5' ERBB2	EGFR	1.76284	0.077976	0.921755
5' CCDC6	YB1	1.76275	0.0779908	0.921755
3' RET	AKT_pT308	-1.76106	0.0782764	0.921755
3' RET	MTOR_pS2448	-1.76053	0.0783663	0.921755
5' MAST2	EIF4G	1.75837	0.0787317	0.921755
5' TBCD	X4EBP1_pT37T46	-1.75609	0.0791215	0.921755
5' MED26	X4EBP1	1.75597	0.0791406	0.921755
5' ERG	X4EBP1_pT70	-1.75373	0.079524	0.922945
3' RET	YB1_pS102	1.75236	0.0797607	0.922945
5' ANK3	INPP4B	1.75033	0.08011	0.923987
5' ZDHHC17	HER3_pY1298	1.74583	0.0808888	0.927585
3' RET	AMPK_pT172	-1.74552	0.0809424	0.927585
5' VPS13B	TSC1	1.74304	0.081374	0.929542
5' ZDHHC17	NF2	1.73753	0.0823412	0.933322
5' ANK3	STATHMIN	-1.73692	0.0824502	0.933322
5' ERG	PKCALPHA	1.73653	0.0825178	0.933322
5' ERG	AKT_pT308	1.73521	0.0827525	0.933322
5' ERG	FOXM1	-1.73179	0.0833592	0.937199
5' ARID1A	SRC	1.72695	0.0842243	0.943948
5' EML4	HER2	1.72528	0.0845262	0.943957
5' ARID1A	P90RSK_pT359S363	-1.72383	0.0847877	0.943957
5' EPS15L1	TAZ	1.72254	0.0850197	0.943957
5' VPS13B	P38_pT180Y182	1.72011	0.0854611	0.945911
5' VPS13B	CHK2_pT68	-1.71675	0.0860733	0.94826
5' EML4	ALPHACATENIN	1.71629	0.0862311	0.94826
5' TBCD	LCK	1.71436	0.0865102	0.94826
5' ARID1A	EGFR	1.71098	0.0871341	0.94826
5' ERG	COLLAGENVI	1.70972	0.0873655	0.94826
5' NF1	CIAP	1.70852	0.087588	0.94826
5' WNK1	TFRC	-1.70823	0.0876426	0.94826
5' RAF1	X1433EPSILON	-1.70737	0.0878018	0.94826
5' NF1	BAD_pS112	-1.70034	0.089115	0.959534
3' RET	CYCLINE1	-1.69874	0.0894173	0.95989
5' EML4	P38_pT180Y182	1.69564	0.0900025	0.961892
5' TBCD	AMPKALPHA	-1.6949	0.0901437	0.961892
5' CCDC6	AKT_pS473	-1.69194	0.090706	0.964163
5' MED26	IGFBP2	-1.6871	0.0916324	0.964163
5' ERG	YAP_pS127	1.68394	0.0922428	0.964163
5' ERBB2	P53	1.68289	0.0924454	0.964163
5' CCDC6	X1433ZETA	1.68249	0.0925221	0.964163
3' RET	BCL2	-1.67689	0.0936124	0.964163
5' EML4	CASPASE7CLEAVEDD198	-1.67654	0.0936821	0.964163
5' TBCD	NF2	1.6749	0.0940034	0.964163
5' ERG	LKB1	1.67437	0.0941069	0.964163
3' RET	MEK1	-1.6732	0.0943371	0.964163
5' PPP1R12A	JNK2	1.67138	0.0946948	0.964163
5' MAST2	SRC	-1.67035	0.0948985	0.964163
5' ERBB2	ALPHACATENIN	1.66995	0.095053	0.964163
5' VPS13B	ERCC1	-1.66839	0.0952879	0.964163
5' EML4	SMAD1	1.66642	0.0956794	0.964163
5' ZDHHC17	P70S6K	1.66506	0.0959507	0.964163
3' RET	INPP4B	-1.6646	0.0960411	0.964163
5' PPP1R12A	TUBERIN_pT1462	1.66442	0.0960782	0.964163
5' ERG	EIF4G	-1.66403	0.0961548	0.964163
5' MED26	PEA15_pS116	-1.66246	0.0964702	0.964163
5' NF1	MSH6	-1.6619	0.0965826	0.964163
5' EGFR	CMYC	-1.66043	0.0968772	0.964163
5' MED26	CHK1_pS345	-1.65976	0.0970113	0.964163
5' ARID1A	PI3KP110ALPHA	-1.65675	0.09762	0.964163
5' RAF1	CJUN_pS73	-1.65659	0.097652	0.964163
5' PPP1R12A	RICTOR_pT1135	1.65593	0.0977855	0.964163
5' VPS13B	BECLIN	1.65432	0.0981111	0.964163
5' MAST2	PDCD4	1.64749	0.0995057	0.964163
5' ARID1A	PTEN	-1.64564	0.0998869	0.964163
5' EPS15L1	DVL3	-1.64093	0.100862	0.964163
5' CCDC6	RAB25	-1.63999	0.101056	0.964163
5' VPS13B	CD20	-1.6395	0.101158	0.964163
5' NF1	VEGFR2	-1.63869	0.101328	0.964163
5' RAF1	LCK	-1.63711	0.101656	0.964163
5' CCDC6	PAXILLIN	1.63479	0.102141	0.964163
5' EPS15L1	XRCC1	-1.6326	0.102602	0.964163
5' EML4	CRAF	1.63234	0.102658	0.964163
5' TBCD	XRCC1	-1.6316	0.102812	0.964163
5' ZDHHC17	PCNA	-1.63065	0.103014	0.964163
5' MED26	ATM	-1.63065	0.103014	0.964163
5' MED26	AKT_pS473	-1.62949	0.103258	0.964163
5' CCDC6	DVL3	1.62876	0.103413	0.964163
5' EGFR	INPP4B	-1.6287	0.103426	0.964163
5' ARID1A	TSC1	-1.62817	0.103537	0.964163
5' ZDHHC17	BRAF	1.62513	0.104185	0.964163
5' ERG	HER2	-1.62426	0.104369	0.964163
5' RAF1	AKT_pT308	1.6237	0.104489	0.964163
5' ARID1A	SCD1	-1.62248	0.10475	0.964163
5' CCDC6	EGFR_pY1068	-1.62184	0.104886	0.964163
5' MED26	AKT_pT308	-1.61955	0.105379	0.964163
5' TBCD	HER3_pY1298	1.6195	0.105389	0.964163
5' WNK1	CD49B	-1.61842	0.10562	0.964163
5' EML4	STATHMIN	-1.61723	0.105879	0.964163
5' ARID1A	YB1	1.61608	0.106126	0.964163
5' VPS13B	SRC_pY527	1.6157	0.106209	0.964163
5' VPS13B	MEK1_pS217S221	1.61292	0.10681	0.964163
5' MED26	HSP70	-1.61249	0.106905	0.964163
5' CCDC6	RAD51	-1.61216	0.106977	0.964163
5' PPP1R12A	YAP_pS127	1.61182	0.107051	0.964163
5' ZDHHC17	PRDX1	-1.6116	0.107099	0.964163
5' MED26	EIF4G	1.61083	0.107265	0.964163
5' CCDC6	MTOR	1.60978	0.107495	0.964163
3' RET	CD31	-1.60779	0.10793	0.964163
3' RET	PI3KP110ALPHA	-1.60523	0.108492	0.964163
5' EML4	P90RSK	1.60438	0.108679	0.964163
5' NF1	PI3KP110ALPHA	1.60187	0.109233	0.964163
5' VPS13B	CASPASE7CLEAVEDD198	-1.6	0.109648	0.964163
5' ANK3	HEREGULIN	-1.59944	0.109772	0.964163
5' EML4	CKIT	-1.59897	0.109877	0.964163
5' ARID1A	VEGFR2	1.59755	0.110192	0.964163
5' ERBB2	AKT_pT308	-1.59678	0.110364	0.964163
3' RET	EGFR_pY1068	-1.59668	0.110387	0.964163
5' ANK3	S6_pS235S236	1.59595	0.110549	0.964163
5' PPP1R12A	FOXO3A	1.59584	0.110574	0.964163
5' CCDC6	TRANSGLUTAMINASE	1.59552	0.110646	0.964163
5' MAST2	ADAR1	1.59141	0.111644	0.964245
5' EML4	SF2	1.58947	0.112004	0.964245
3' RET	SF2	-1.58938	0.112025	0.964245
5' ERG	GAPDH	-1.58895	0.11212	0.964245
5' MED26	PKCALPHA	1.58606	0.112775	0.964245
5' MAST2	BAP1C4	1.58586	0.11282	0.964245
5' VPS13B	PARP1	-1.58675	0.112821	0.964245
5' ERBB2	BAX	-1.58536	0.112935	0.964245
5' MED26	HER3_pY1298	1.58389	0.113267	0.964245
5' PPP1R12A	MYOSINIIA_pS1943	-1.58348	0.113361	0.964245
5' CCDC6	BECLIN	-1.58079	0.113975	0.964615
5' CCDC6	PI3KP110ALPHA	-1.58024	0.114102	0.964615
5' RAF1	ADAR1	1.58007	0.114216	0.964615
5' EPS15L1	MYH11	-1.57598	0.115081	0.969617
5' MED26	JNK_pT183Y185	-1.57451	0.11542	0.970181
5' EPS15L1	BAK	-1.56852	0.11681	0.978858
5' MAST2	PDK1_pS241	1.56757	0.11703	0.978858
5' ERBB2	SHC_pY317	1.56463	0.117719	0.978858
5' ARID1A	SHC_pY317	-1.56376	0.117925	0.978858
5' ANK3	PTEN	1.56197	0.118346	0.978858
5' PPP1R12A	BRCA2	1.56097	0.118588	0.978858
5' MED26	MIG6	1.56024	0.118754	0.978858
5' MED26	RAD50	-1.55985	0.118844	0.978858
3' RET	CAVEOLIN1	1.55799	0.119286	0.978858
5' ERBB2	AR	-1.5572	0.119472	0.978858
5' CCDC6	IRS1	-1.5572	0.119473	0.978858
5' TBCD	SMAD1	-1.55482	0.120037	0.980754
5' EPS15L1	JNK_pT183Y185	1.55294	0.120488	0.980754
5' VPS13B	CYCLIND1	-1.55253	0.120585	0.980754
5' MAST2	SHC_pY317	1.55052	0.121066	0.980754
5' PPP1R12A	AR	-1.54974	0.121253	0.980754
5' ZDHHC17	SRC_pY416	-1.54848	0.121555	0.980754
5' MAST2	TUBERIN	1.54752	0.121787	0.980754
5' ERG	CHK1	1.54703	0.121906	0.980754
5' MAST2	BCL2	1.54412	0.122609	0.982246
5' VPS13B	MYH11	-1.54298	0.122885	0.982246
5' EML4	YAP_pS127	1.54284	0.122919	0.982246
5' ERBB2	CYCLINE2	-1.53693	0.124361	0.991547
5' ERBB2	AKT_pS473	-1.53225	0.125511	0.998487
5' CCDC6	CD49B	-1.52777	0.126618	1
5' CCDC6	FIBRONECTIN	-1.52761	0.12666	1
5' EGFR	AMPKALPHA	-1.52388	0.127588	1
5' ARID1A	NF2	1.52247	0.127941	1
5' ANK3	X4EBP1_pT70	-1.52033	0.128478	1
5' ERG	MAPK_pT202Y204	1.51949	0.12869	1
3' RET	NOTCH1	-1.51878	0.128868	1
5' TBCD	SCD1	1.51614	0.129534	1
5' WNK1	STAT5ALPHA	1.51571	0.129642	1
5' MED26	ERALPHA_pS118	-1.51472	0.129892	1
5' VPS13B	BAD_pS112	1.51216	0.130542	1
5' EPS15L1	CYCLINE2	1.50774	0.13167	1
5' EGFR	CDK1	-1.50101	0.133403	1
5' WNK1	BAX	-1.50066	0.133493	1
5' RAF1	NDRG1_pT346	-1.49989	0.133693	1
5' VPS13B	PCADHERIN	-1.49973	0.133735	1
5' PPP1R12A	FOXO3A_pS318S321	1.49944	0.133808	1
5' ERBB2	CRAF_pS338	-1.49773	0.134252	1
5' EGFR	IGFBP2	-1.49593	0.134721	1
5' CCDC6	P38MAPK	1.495	0.134963	1
5' ERG	MRE11	-1.49385	0.135264	1
5' VPS13B	RICTOR_pT1135	1.49236	0.135655	1
5' EPS15L1	STATHMIN	1.49154	0.135869	1
5' RAF1	S6_pS240S244	1.49093	0.136029	1
5' EGFR	RAB25	-1.48997	0.136283	1
5' ERBB2	CASPASE9	-1.49084	0.136845	1
5' RAF1	SRC	-1.48555	0.137449	1
3' RET	P90RSK_pT359S363	-1.48404	0.137847	1
5' EPS15L1	SF2	-1.48187	0.138425	1
5' CCDC6	HER3	-1.48113	0.138621	1
5' VPS13B	P27	-1.47997	0.13893	1
5' TBCD	ASNS	-1.47938	0.139089	1
5' EML4	X53BP1	1.47847	0.139332	1
5' MAST2	ERK2	1.4768	0.139778	1
5' CCDC6	PKCDELTA_pS664	-1.47441	0.140419	1
5' TBCD	HER2_pY1248	1.47208	0.141048	1
5' MED26	PKCALPHA_pS657	1.46865	0.141977	1
5' ERG	RICTOR	1.46571	0.142777	1
5' CCDC6	HER2	1.46443	0.143126	1
5' EPS15L1	P90RSK_pT359S363	1.46185	0.143832	1
5' EPS15L1	ERK2	-1.45943	0.144495	1
5' ERG	XBP1	-1.45929	0.144535	1
5' WNK1	STATHMIN	-1.45927	0.14454	1
5' ERG	DVL3	-1.45785	0.14493	1
5' ERBB2	ACC1	1.45707	0.145145	1
5' MED26	ANNEXINVII	1.45689	0.145196	1
5' EGFR	CHK2_pT68	-1.45686	0.145204	1
5' PPP1R12A	ACVRL1	1.45535	0.145621	1
5' EGFR	CIAP	-1.45505	0.145704	1
5' ERG	IRS1	-1.45454	0.145846	1
5' ERBB2	EIF4G	1.45348	0.146139	1
5' ERG	PKCPANBETAII_pS660	1.45133	0.146736	1
5' ARID1A	FOXO3A	-1.44878	0.147449	1
5' ANK3	SMAD4	-1.44764	0.147767	1
5' ZDHHC17	EEF2K	1.44615	0.148183	1
5' CCDC6	STAT5ALPHA	1.44553	0.148357	1
5' CCDC6	TFRC	1.44475	0.148576	1
5' TBCD	EEF2K	1.4436	0.148901	1
5' ERBB2	RAB25	1.44305	0.149057	1
5' EGFR	ACETYLATUBULINLYS40	-1.44226	0.149279	1
5' EML4	BECLIN	1.4374	0.150654	1
5' NF1	PTEN	1.4365	0.150909	1
5' ANK3	SRC_pY416	1.43596	0.151064	1
5' ARID1A	PEA15_pS116	1.43466	0.151434	1
5' VPS13B	PAI1	1.43299	0.151909	1
5' MED26	BAX	1.43194	0.152211	1
5' MED26	BCL2	-1.4298	0.152823	1
5' ERBB2	FASN	1.42959	0.152883	1
5' ERBB2	VHL	1.42928	0.152972	1
5' EML4	CHK2_pT68	-1.42769	0.153429	1
5' NF1	AKT	1.4273	0.153542	1
5' NF1	CJUN_pS73	-1.42716	0.153584	1
5' MED26	LCK	1.42685	0.153672	1
5' ERBB2	TUBERIN_pT1462	-1.42582	0.15397	1
5' MED26	NF2	-1.42512	0.15417	1
5' CCDC6	ARID1A	-1.42495	0.154276	1
5' ERG	AKT_pS473	1.42455	0.154336	1
5' CCDC6	AKT	1.42452	0.154346	1
5' RAF1	X4EBP1_pT70	-1.42245	0.154945	1
5' EML4	PI3KP110ALPHA	1.42216	0.155028	1
5' MAST2	RICTOR	-1.42125	0.155293	1
5' TBCD	IRS1	1.41928	0.155867	1
5' PPP1R12A	XRCC1	-1.41892	0.15597	1
5' NF1	X1433BETA	-1.41842	0.156116	1
5' MED26	COLLAGENVI	-1.41676	0.1566	1
5' ZDHHC17	BECLIN	-1.41629	0.15674	1
5' VPS13B	X1433EPSILON	-1.41504	0.157106	1
5' ARID1A	FIBRONECTIN	1.41249	0.157856	1
5' EML4	ASNS	-1.41012	0.158554	1
3' RET	BID	1.40895	0.158899	1
5' MED26	GSK3ALPHABETA	1.40865	0.158986	1
5' WNK1	VHL	-1.40806	0.159163	1
5' EML4	AKT	1.40694	0.159493	1
5' CCDC6	RAD50	1.40687	0.159515	1
5' EML4	MSH2	1.4065	0.159625	1
5' MAST2	P53	1.40621	0.159711	1
5' RAF1	PR	-1.40546	0.159933	1
5' ANK3	MYOSINIIA_pS1943	1.40541	0.159947	1
5' MED26	ERCC1	-1.40479	0.160133	1
5' VPS13B	CHK1	-1.40472	0.160152	1
5' RAF1	SHC_pY317	-1.40376	0.160438	1
5' EML4	CYCLINB1	-1.40103	0.161254	1
5' NF1	CYCLINB1	1.40094	0.16128	1
5' CCDC6	SMAD1	1.39973	0.161642	1
5' EPS15L1	NF2	-1.39939	0.161745	1
5' MAST2	ACC1	1.39822	0.162096	1
5' ERBB2	BETACATENIN	1.39804	0.162148	1
5' MED26	MTOR_pS2448	-1.39786	0.162202	1
5' MAST2	AKT_pT308	-1.3972	0.162401	1
5' WNK1	CASPASE7CLEAVEDD198	1.39561	0.162881	1
5' EPS15L1	AMPKALPHA	-1.39493	0.163087	1
5' RAF1	P70S6K_pT389	-1.39185	0.164016	1
5' ARID1A	SF2	-1.39085	0.16432	1
3' RET	STAT5ALPHA	1.3895	0.164729	1
5' EPS15L1	BCL2	-1.38751	0.165334	1
5' ZDHHC17	ATM	1.38703	0.165482	1
3' RET	BAD_pS112	1.38642	0.165666	1
5' MED26	EGFR_pY1068	1.38414	0.166363	1
5' ANK3	FOXM1	-1.38259	0.166839	1
5' PPP1R12A	RAD51	1.38108	0.167303	1
5' ERBB2	PDCD4	-1.37922	0.167874	1
5' TBCD	GSK3ALPHABETA_pS21S9	-1.3788	0.168006	1
5' MAST2	PEA15	1.37826	0.16817	1
5' CCDC6	INPP4B	-1.37713	0.168519	1
5' ZDHHC17	MSH6	1.37495	0.169196	1
5' MED26	BRAF	1.37483	0.169233	1
5' ARID1A	SRC_pY416	-1.37359	0.169618	1
5' VPS13B	PREX1	-1.3727	0.169893	1
5' ERBB2	ARAF_pS299	1.37251	0.169952	1
5' VPS13B	MTOR_pS2448	-1.37234	0.170005	1
5' CCDC6	G6PD	1.37194	0.170131	1
5' RAF1	MIG6	1.36992	0.17076	1
5' ANK3	VHL	1.36835	0.17125	1
5' MAST2	JAB1	1.36876	0.171318	1
5' VPS13B	CD49B	-1.36806	0.171341	1
3' RET	EGFR	1.36722	0.171605	1
5' ANK3	BID	-1.36512	0.172263	1
5' CCDC6	JNK_pT183Y185	-1.36398	0.172622	1
5' ANK3	GSK3ALPHABETA_pS21S9	1.36294	0.17295	1
5' EPS15L1	SMAC	-1.36268	0.173031	1
5' ERG	MIG6	-1.36254	0.173075	1
5' ERG	BCL2	1.36192	0.17327	1
5' TBCD	X4EBP1	-1.36062	0.173682	1
5' ANK3	SMAD3	-1.36011	0.173844	1
5' EML4	ATM	1.35886	0.174239	1
5' ZDHHC17	SRC	1.35787	0.174553	1
5' WNK1	TTF1	-1.35671	0.174994	1
3' RET	COLLAGENVI	-1.35576	0.175224	1
5' ARID1A	YB1_pS102	-1.35565	0.175259	1
5' ANK3	PREX1	1.35556	0.175288	1
5' MED26	FASN	1.35473	0.175553	1
5' CCDC6	SF2	-1.35418	0.175728	1
5' ERBB2	INPP4B	1.35403	0.175774	1
5' NF1	RAD51	-1.35152	0.176577	1
5' ANK3	ACC_pS79	1.35145	0.176601	1
5' RAF1	SMAD3	-1.34931	0.177287	1
3' RET	RAPTOR	1.34886	0.17743	1
5' EML4	PKCALPHA_pS657	1.34819	0.177645	1
5' CCDC6	ATM	1.34756	0.177849	1
5' ERBB2	JAB1	1.34716	0.178171	1
5' TBCD	FIBRONECTIN	-1.34455	0.178817	1
5' EML4	IGFBP2	1.34203	0.179633	1
5' ANK3	CYCLIND1	-1.34199	0.179647	1
5' MAST2	XBP1	1.34128	0.179876	1
5' ERG	EIF4E	-1.34107	0.179946	1
5' ERBB2	PDK1_pS241	1.34009	0.180263	1
3' RET	DJ1	1.33771	0.181037	1
5' TBCD	STAT5ALPHA	1.33764	0.181061	1
3' RET	ASNS	-1.33746	0.181122	1
5' VPS13B	RICTOR	-1.33662	0.181393	1
5' VPS13B	ACC_pS79	1.33439	0.182125	1
5' ERG	BCLXL	-1.3324	0.182776	1
5' EPS15L1	EEF2	-1.33163	0.18303	1
5' EGFR	RAB11	-1.33048	0.183407	1
5' ERG	CD20	-1.33001	0.183562	1
5' RAF1	FOXM1	-1.32892	0.18392	1
3' RET	SMAD1	1.3288	0.183962	1
5' PPP1R12A	ALPHACATENIN	1.32521	0.18522	1
5' EML4	BIM	-1.32146	0.186395	1
5' ANK3	TUBERIN_pT1462	1.3203	0.186783	1
5' EGFR	MEK1_pS217S221	-1.31967	0.186991	1
5' ERBB2	X1433BETA	1.3182	0.187485	1
5' VPS13B	PRDX1	-1.31603	0.18821	1
5' NF1	CD49B	1.31454	0.188711	1
5' WNK1	SRC	-1.31392	0.188922	1
5' VPS13B	CDK1	-1.31331	0.189126	1
5' WNK1	RBM15	1.3128	0.189297	1
5' ERBB2	PRAS40_pT246	-1.31071	0.190004	1
5' CCDC6	RB_pS807S811	1.30836	0.1908	1
5' MED26	NCADHERIN	-1.30797	0.19093	1
5' VPS13B	SRC	-1.30507	0.191916	1
5' TBCD	CDK1	-1.30476	0.192021	1
5' ERG	S6_pS240S244	1.30363	0.192407	1
5' WNK1	ANNEXIN1	-1.30184	0.193018	1
5' PPP1R12A	TSC1	1.30135	0.193186	1
5' ERG	CHK2	-1.30083	0.193363	1
5' ARID1A	P38_pT180Y182	-1.29991	0.193677	1
5' RAF1	YAP_pS127	-1.29959	0.193788	1
5' MED26	GSK3ALPHABETA_pS21S9	-1.29956	0.193799	1
5' ERBB2	YAP	1.29818	0.194271	1
5' WNK1	NDRG1_pT346	1.29814	0.194285	1
5' VPS13B	AMPKALPHA	-1.29721	0.194607	1
5' ZDHHC17	NFKBP65_pS536	1.29692	0.194705	1
5' ARID1A	ATM	-1.29402	0.195706	1
5' MED26	XBP1	-1.29378	0.195789	1
5' ANK3	CYCLINB1	-1.29321	0.195985	1
5' TBCD	P21	1.2913	0.196647	1
5' ANK3	EGFR_pY1173	-1.28973	0.19719	1
3' RET	BIM	-1.28848	0.197625	1
5' ERBB2	BRAF	1.28808	0.197766	1
5' EPS15L1	CAVEOLIN1	-1.28748	0.197975	1
5' EPS15L1	ARAF_pS299	-1.28737	0.198012	1
5' VPS13B	NRAS	1.28505	0.19882	1
5' CCDC6	CD31	-1.28424	0.199103	1
3' RET	HSP70	1.28271	0.199641	1
5' RAF1	ANNEXIN1	-1.28201	0.199887	1
5' MAST2	MYH11	-1.2805	0.200417	1
5' ERBB2	P27	-1.28001	0.200589	1
5' WNK1	TUBERIN	1.2799	0.200626	1
5' ERBB2	BAK	-1.27949	0.20077	1
5' TBCD	BAP1C4	1.2766	0.201789	1
3' RET	GSK3ALPHABETA_pS21S9	1.27612	0.201958	1
5' CCDC6	MEK1	-1.27399	0.202712	1
5' VPS13B	RAB11	-1.27343	0.20291	1
5' MAST2	CMYC	-1.27274	0.203156	1
5' MED26	P27	-1.27128	0.203677	1
5' MAST2	TAZ	-1.27119	0.203708	1
5' ERBB2	SMAD1	-1.26998	0.204136	1
5' ANK3	X1433EPSILON	-1.26955	0.204292	1
5' PPP1R12A	SRC_pY416	1.26937	0.204357	1
5' VPS13B	EIF4E	1.26661	0.205341	1
5' CCDC6	PDCD4	1.26577	0.20564	1
5' EPS15L1	BETACATENIN	-1.26385	0.206329	1
5' MED26	CYCLINE1	1.26312	0.206593	1
5' EML4	TUBERIN	1.26125	0.207265	1
5' WNK1	FASN	-1.26105	0.207338	1
5' VPS13B	P70S6K	1.25982	0.207781	1
5' RAF1	GSK3ALPHABETA_pS21S9	1.2591	0.208039	1
5' ARID1A	NOTCH1	1.25906	0.208056	1
5' NF1	ACC_pS79	-1.25751	0.208614	1
5' MED26	ETS1	-1.25692	0.20883	1
5' CCDC6	ERCC1	1.25689	0.208841	1
5' PPP1R12A	P70S6K	-1.25654	0.208965	1
5' ARID1A	P53	-1.25638	0.209024	1
5' RAF1	CHK2_pT68	-1.25614	0.209112	1
5' EGFR	BCLXL	-1.25576	0.209248	1
5' ERG	SRC_pY527	1.2538	0.20996	1
5' ZDHHC17	SMAD4	-1.25368	0.210005	1
5' ANK3	FIBRONECTIN	-1.2523	0.210508	1
5' ZDHHC17	CD49B	-1.25214	0.210566	1
5' EGFR	RICTOR_pT1135	-1.25177	0.210701	1
5' MAST2	RAPTOR	1.25174	0.210709	1
5' MED26	GSK3_pS9	-1.25011	0.211306	1
5' ERG	HSP70	1.24954	0.211515	1
5' VPS13B	X53BP1	1.24946	0.211544	1
5' ARID1A	X4EBP1_pT70	-1.24919	0.21164	1
5' WNK1	SRC_pY416	-1.24884	0.211769	1
5' ERG	GSK3_pS9	1.24824	0.21199	1
5' NF1	VHL	1.24675	0.212536	1
5' VPS13B	MEK1	1.24665	0.212573	1
3' RET	EIF4G	1.24634	0.212687	1
5' MAST2	PDK1	1.24633	0.212689	1
3' RET	MYOSINIIA_pS1943	1.2448	0.213249	1
5' EPS15L1	CHK2_pT68	1.24479	0.213254	1
5' MAST2	HEREGULIN	-1.24452	0.213355	1
3' RET	BAP1C4	-1.2435	0.213728	1
5' VPS13B	ASNS	1.2426	0.21406	1
5' EML4	GSK3_pS9	1.24136	0.214519	1
5' TBCD	VHL	1.24059	0.214804	1
5' EML4	RAD50	1.23791	0.215795	1
5' ANK3	YB1_pS102	-1.23569	0.216621	1
5' EPS15L1	P38_pT180Y182	1.23484	0.216934	1
5' PPP1R12A	X4EBP1_pT70	1.23259	0.217774	1
5' EGFR	IRS1	-1.23125	0.218275	1
5' VPS13B	STAT5ALPHA	1.22868	0.219235	1
3' RET	ERCC1	1.22754	0.219663	1
5' ERBB2	SCD1	1.22691	0.219902	1
5' TBCD	PTEN	1.22689	0.219908	1
5' MAST2	BAK	1.22678	0.21995	1
5' EML4	P38MAPK	1.22636	0.220109	1
5' ERG	CYCLINE1	-1.22597	0.220255	1
5' RAF1	PKCPANBETAII_pS660	1.22553	0.220422	1
3' RET	XRCC1	-1.22403	0.220984	1
5' MED26	PI3KP85	1.22395	0.221017	1
5' EPS15L1	AKT_pT308	1.22235	0.221622	1
5' ANK3	HER3_pY1298	-1.22102	0.222123	1
3' RET	LCK	1.22012	0.222464	1
5' CCDC6	CASPASE7CLEAVEDD198	1.22003	0.222499	1
5' ZDHHC17	TAZ	-1.21988	0.222555	1
5' RAF1	BECLIN	-1.21958	0.222669	1
5' ANK3	EGFR	-1.21956	0.222678	1
5' ERBB2	X4EBP1_pT37T46	-1.21694	0.223671	1
5' ERG	ACVRL1	1.21477	0.224498	1
5' PPP1R12A	CLAUDIN7	-1.21456	0.224579	1
5' WNK1	X1433ZETA	-1.21438	0.224647	1
5' ERBB2	P70S6K	1.21384	0.224854	1
5' NF1	PRAS40_pT246	-1.21313	0.225126	1
5' MED26	SRC	1.21255	0.225348	1
5' MAST2	LKB1	-1.2103	0.226207	1
5' ANK3	KU80	1.20809	0.227059	1
5' EPS15L1	DJ1	-1.20787	0.227143	1
5' ERG	XRCC1	-1.20697	0.227488	1
5' EML4	SMAD4	1.20609	0.227829	1
5' CCDC6	NDRG1_pT346	-1.20593	0.227887	1
5' MAST2	COLLAGENVI	-1.20362	0.22878	1
5' VPS13B	PEA15	-1.20177	0.229498	1
5' ERG	RAPTOR	1.20133	0.229669	1
5' MAST2	NFKBP65_pS536	1.2012	0.229718	1
5' ANK3	CRAF_pS338	-1.19975	0.230281	1
5' WNK1	ARAF_pS299	-1.19874	0.230672	1
5' TBCD	ERK2	1.19827	0.230857	1
5' MAST2	PKCDELTA_pS664	1.19788	0.231008	1
5' ERBB2	BCL2	-1.19778	0.231048	1
3' RET	NF2	1.19744	0.231178	1
5' EML4	P90RSK_pT359S363	1.19738	0.231203	1
5' MAST2	TSC1	1.19628	0.23163	1
5' VPS13B	EIF4G	1.19555	0.231918	1
5' MAST2	AKT_pS473	-1.19535	0.231994	1
5' ERG	BAP1C4	-1.19503	0.232118	1
5' EGFR	PI3KP110ALPHA	-1.19483	0.232197	1
3' RET	JNK_pT183Y185	-1.19433	0.232395	1
5' ARID1A	PCADHERIN	1.19376	0.232616	1
5' WNK1	AR	1.19205	0.233285	1
5' NF1	KU80	-1.19148	0.233508	1
5' ERBB2	P27_pT157	1.19074	0.233801	1
5' WNK1	HER2_pY1248	-1.1889	0.234523	1
5' VPS13B	BAX	-1.18809	0.234843	1
3' RET	ERALPHA	-1.18786	0.234932	1
5' VPS13B	ARID1A	-1.18714	0.235267	1
5' WNK1	JNK2	-1.18644	0.235493	1
5' EML4	HEREGULIN	-1.18631	0.235545	1
5' TBCD	ADAR1	-1.18608	0.235702	1
5' EML4	CRAF_pS338	-1.18578	0.235755	1
5' MAST2	CYCLIND1	-1.18537	0.235916	1
5' ERBB2	TUBERIN	1.1844	0.2363	1
5' EGFR	YAP	-1.18329	0.236737	1
5' ANK3	BAP1C4	1.18255	0.237032	1
3' RET	CIAP	-1.18253	0.237037	1
5' RAF1	TRANSGLUTAMINASE	-1.18159	0.237414	1
5' TBCD	X4EBP1_pT70	-1.17993	0.238073	1
5' PPP1R12A	DJ1	-1.1794	0.238284	1
5' EML4	FOXM1	-1.17917	0.238376	1
5' ZDHHC17	HEREGULIN	-1.1785	0.238642	1
5' CCDC6	SYK	1.17845	0.238662	1
5' TBCD	JNK_pT183Y185	-1.17783	0.238909	1
5' RAF1	YB1	1.17683	0.239306	1
5' RAF1	RB_pS807S811	1.1765	0.239438	1
5' MAST2	CHK1_pS345	1.17613	0.239585	1
5' ANK3	AMPK_pT172	1.17537	0.239892	1
5' NF1	CD31	1.17484	0.240102	1
5' RAF1	CAVEOLIN1	-1.17477	0.24013	1
5' ERG	GAB2	1.17388	0.240488	1
5' RAF1	PRAS40_pT246	1.17212	0.241193	1
5' TBCD	X1433EPSILON	-1.17131	0.241519	1
5' WNK1	ECADHERIN	-1.17106	0.241618	1
5' ZDHHC17	PEA15_pS116	-1.17059	0.241807	1
5' CCDC6	XBP1	-1.1705	0.241843	1
5' ANK3	HER2_pY1248	-1.17039	0.241889	1
5' ARID1A	HER2	1.17024	0.241949	1
5' MAST2	MTOR	1.16788	0.242897	1
5' ARID1A	IGFBP2	1.16771	0.242968	1
5' CCDC6	BAD_pS112	1.16569	0.243783	1
5' ERG	RAB25	-1.16453	0.244254	1
5' MAST2	HER3_pY1298	1.16433	0.244335	1
5' WNK1	MEK1_pS217S221	-1.16326	0.244767	1
5' ARID1A	FASN	1.16304	0.244858	1
5' RAF1	SMAD4	-1.16291	0.244908	1
5' ERBB2	EEF2	-1.1621	0.245239	1
5' PPP1R12A	ERCC1	-1.16179	0.245366	1
5' PPP1R12A	MAPK_pT202Y204	1.1617	0.245399	1
5' ERBB2	MAPK_pT202Y204	-1.16067	0.245819	1
5' RAF1	STAT5ALPHA	-1.16066	0.245823	1
5' NF1	YB1_pS102	-1.16022	0.246004	1
5' ZDHHC17	X4EBP1	1.15985	0.246151	1
5' ZDHHC17	STAT3_pY705	-1.15875	0.246603	1
5' VPS13B	ACETYLATUBULINLYS40	1.15866	0.246637	1
5' EML4	PDCD4	1.15821	0.246823	1
5' ZDHHC17	PDK1	1.15815	0.246845	1
5' ERBB2	MEK1_pS217S221	-1.15772	0.247023	1
5' EML4	PKCDELTA_pS664	1.15702	0.247305	1
5' VPS13B	BCLXL	1.15629	0.247605	1
5' MED26	ACC_pS79	1.15552	0.247923	1
5' ERBB2	EGFR_pY1173	-1.15491	0.248171	1
5' ZDHHC17	TUBERIN_pT1462	1.15451	0.248334	1
5' ERG	PRDX1	-1.15392	0.248576	1
5' ERBB2	GSK3_pS9	-1.15263	0.249107	1
3' RET	BAX	1.15254	0.249142	1
5' ZDHHC17	CAVEOLIN1	-1.15182	0.249439	1
5' EPS15L1	RAPTOR	-1.15101	0.249771	1
5' ERBB2	CASPASE3	-1.15175	0.250159	1
3' RET	ECADHERIN	-1.14978	0.250278	1
5' ANK3	XRCC1	-1.14954	0.250376	1
5' EPS15L1	P70S6K_pT389	1.14729	0.251304	1
5' EGFR	RAD51	-1.14601	0.251833	1
5' ERG	SCD1	-1.14548	0.252052	1
3' RET	IRS1	-1.14548	0.252053	1
5' CCDC6	BID	1.14526	0.252143	1
5' ANK3	GSK3_pS9	1.14351	0.25287	1
5' NF1	P62LCKLIGAND	1.14285	0.253143	1
5' CCDC6	HSP70	1.14197	0.253509	1
5' PPP1R12A	NFKBP65_pS536	1.14107	0.253884	1
5' MED26	RAB11	-1.14055	0.254099	1
5' CCDC6	CYCLINE1	-1.13754	0.255356	1
5' MED26	AMPK_pT172	1.13735	0.255435	1
5' NF1	AKT_pS473	-1.13685	0.255642	1
5' EGFR	CAVEOLIN1	-1.13613	0.255947	1
5' EPS15L1	CRAF_pS338	1.13418	0.256763	1
5' MAST2	CD20	-1.13415	0.256775	1
5' MAST2	EEF2	1.1322	0.257592	1
5' EPS15L1	ATM	-1.13129	0.257974	1
5' ERG	CD49B	-1.13064	0.25825	1
5' ANK3	CYCLINE2	-1.12965	0.258666	1
5' MED26	PDCD4	-1.12757	0.259546	1
5' CCDC6	MTOR_pS2448	-1.12691	0.259822	1
3' RET	MRE11	-1.12554	0.260404	1
3' RET	TFRC	1.12537	0.260475	1
3' RET	RAD51	-1.12507	0.2606	1
3' RET	GSK3ALPHABETA	1.12418	0.260979	1
5' ARID1A	MYH11	-1.12389	0.261104	1
5' RAF1	TAZ	1.12382	0.261133	1
5' ZDHHC17	G6PD	-1.12339	0.261313	1
3' RET	XBP1	-1.12275	0.261587	1
5' PPP1R12A	S6_pS235S236	1.12162	0.262066	1
5' EPS15L1	P27_pT157	1.12111	0.262283	1
5' EGFR	CYCLINE2	-1.12071	0.262454	1
5' TBCD	CASPASE7CLEAVEDD198	1.11916	0.263112	1
5' ZDHHC17	BAD_pS112	1.11861	0.263349	1
5' NF1	DVL3	1.11843	0.263426	1
5' ZDHHC17	TFRC	-1.11526	0.26478	1
5' NF1	TFRC	1.11519	0.264813	1
5' WNK1	CMET_pY1235	-1.11495	0.264914	1
5' EGFR	GAPDH	-1.11461	0.265059	1
5' NF1	X4EBP1_pT37T46	-1.11391	0.26536	1
5' TBCD	MEK1	1.11338	0.265589	1
5' PPP1R12A	ACC_pS79	-1.1123	0.266052	1
5' TBCD	FOXO3A_pS318S321	-1.11191	0.266218	1
5' PPP1R12A	P70S6K_pT389	1.11191	0.266218	1
5' ZDHHC17	ARAF_pS299	-1.11159	0.266357	1
5' EGFR	ERALPHA_pS118	-1.11133	0.266468	1
5' EGFR	PEA15	1.111	0.26661	1
5' RAF1	EEF2	-1.11096	0.266627	1
5' EML4	X1433ZETA	-1.11075	0.266719	1
5' MED26	RAPTOR	-1.10996	0.267058	1
5' ARID1A	ETS1	1.10733	0.268191	1
5' ARID1A	CRAF_pS338	-1.10668	0.268475	1
5' MAST2	CHK1	-1.1061	0.268723	1
5' RAF1	NFKBP65_pS536	1.10591	0.268805	1
5' ERG	P27_pT198	-1.10584	0.268837	1
5' PPP1R12A	PTEN	-1.10553	0.268971	1
5' NF1	RAPTOR	1.10511	0.269153	1
5' ERG	FOXO3A	-1.10502	0.269193	1
3' RET	CYCLINB1	-1.10326	0.269956	1
5' ERBB2	PAI1	-1.10322	0.269973	1
5' EML4	MAPK_pT202Y204	1.1022	0.270417	1
5' VPS13B	ALPHACATENIN	-1.10131	0.270869	1
5' ZDHHC17	JNK2	-1.10086	0.270998	1
5' ANK3	ANNEXIN1	1.09996	0.271393	1
5' ERBB2	TAZ	-1.0988	0.271896	1
5' VPS13B	FOXO3A_pS318S321	-1.0985	0.272029	1
5' ERG	X1433BETA	1.09845	0.272051	1
3' RET	PREX1	-1.09775	0.272353	1
5' ANK3	NCADHERIN	-1.09754	0.272448	1
5' ERBB2	RAPTOR	-1.09747	0.272476	1
5' MAST2	NCADHERIN	-1.0969	0.272726	1
5' EML4	VHL	-1.09566	0.273267	1
5' VPS13B	PDK1	-1.09558	0.273305	1
5' ARID1A	CKIT	-1.09218	0.274795	1
5' ZDHHC17	P62LCKLIGAND	-1.09181	0.27496	1
3' RET	STAT3_pY705	1.09149	0.275098	1
5' PPP1R12A	SF2	1.09137	0.275151	1
5' EGFR	MEK1	-1.08986	0.275814	1
5' CCDC6	P53	-1.089	0.276194	1
3' RET	DVL3	1.08882	0.276274	1
5' WNK1	BAD_pS112	1.08816	0.276567	1
5' ZDHHC17	TSC1	1.08772	0.276758	1
5' RAF1	CD31	-1.0871	0.277032	1
5' CCDC6	EEF2	1.08633	0.277373	1
5' MAST2	RAD51	1.08569	0.277656	1
5' MED26	P62LCKLIGAND	-1.08568	0.27766	1
5' ANK3	RBM15	1.08437	0.27824	1
5' RAF1	P38_pT180Y182	1.08298	0.278859	1
5' ERBB2	S6_pS240S244	-1.08272	0.278975	1
5' WNK1	ASNS	-1.08256	0.279045	1
5' EPS15L1	X4EBP1_pT70	1.0821	0.27925	1
5' CCDC6	X4EBP1	-1.08169	0.279433	1
3' RET	PCNA	-1.08004	0.280167	1
5' ERBB2	TRANSGLUTAMINASE	-1.07956	0.28038	1
5' EML4	P21	-1.07916	0.280556	1
5' EGFR	JNK_pT183Y185	-1.07887	0.280685	1
5' CCDC6	RAB11	1.07823	0.280971	1
5' ANK3	ACVRL1	-1.07805	0.281052	1
5' MAST2	MAPK_pT202Y204	-1.07754	0.281281	1
5' MAST2	XRCC1	1.07672	0.281647	1
5' NF1	FOXO3A_pS318S321	-1.07658	0.281708	1
5' PPP1R12A	PKCDELTA_pS664	1.07619	0.281884	1
5' VPS13B	GSK3_pS9	1.07558	0.282154	1
3' RET	P27	-1.07555	0.28217	1
5' PPP1R12A	S6	-1.07468	0.28256	1
5' ANK3	CMYC	-1.07456	0.282613	1
3' RET	S6_pS235S236	1.07306	0.283284	1
5' EGFR	X4EBP1_pT37T46	1.07171	0.283889	1
3' RET	YB1	1.07165	0.283917	1
5' EGFR	NFKBP65_pS536	-1.07102	0.284201	1
5' ERG	MSH6	-1.07042	0.284469	1
5' ERG	G6PD	-1.07041	0.284476	1
5' ANK3	SCD1	1.06982	0.284743	1
5' MED26	YAP_pS127	1.06942	0.28492	1
5' EGFR	AKT_pS473	1.06897	0.285122	1
5' RAF1	PTEN	-1.06867	0.285258	1
5' ARID1A	MYOSINIIA_pS1943	1.06835	0.285405	1
5' EGFR	EGFR_pY1173	1.06759	0.285746	1
5' MED26	S6	1.06494	0.286941	1
5' EGFR	CLAUDIN7	-1.06461	0.287094	1
5' EML4	PR	-1.06283	0.287899	1
5' VPS13B	PAXILLIN	1.06244	0.288075	1
5' PPP1R12A	TUBERIN	-1.06101	0.288727	1
5' MED26	FIBRONECTIN	-1.06099	0.288733	1
5' ERBB2	HER3	1.0607	0.288865	1
5' WNK1	PKCPANBETAII_pS660	1.05846	0.289887	1
5' ANK3	AKT_pT308	1.05577	0.291111	1
5' CCDC6	EIF4E	1.05495	0.291489	1
5' EML4	S6_pS235S236	1.05436	0.291759	1
5' CCDC6	YAP	1.05388	0.291978	1
5' VPS13B	YAP_pS127	1.05383	0.292002	1
5' MAST2	P27	1.0529	0.292427	1
5' VPS13B	P27_pT198	-1.05265	0.292541	1
5' ANK3	X1433BETA	-1.05247	0.292626	1
5' ZDHHC17	SMAD1	1.05238	0.292665	1
5' ERG	ACC1	-1.05109	0.293256	1
5' VPS13B	SHC_pY317	-1.05079	0.293394	1
5' NF1	TUBERIN_pT1462	-1.04959	0.293948	1
5' MED26	SF2	-1.04924	0.294105	1
5' EGFR	GSK3ALPHABETA	-1.04915	0.294151	1
5' MED26	CAVEOLIN1	-1.04827	0.294553	1
5' MAST2	MRE11	-1.04811	0.294627	1
5' EGFR	CRAF_pS338	-1.04782	0.294761	1
5' CCDC6	MIG6	-1.04669	0.295281	1
5' CCDC6	GAB2	1.04642	0.295408	1
5' NF1	TTF1	1.04625	0.295547	1
5' NF1	DJ1	-1.04606	0.295573	1
5' RAF1	BAK	-1.04601	0.295595	1
5' TBCD	EIF4E	-1.04493	0.296094	1
5' ANK3	MTOR	1.04487	0.296122	1
5' MED26	TUBERIN	-1.04407	0.296495	1
5' EML4	ERALPHA_pS118	1.0435	0.296758	1
5' MED26	CASPASE7CLEAVEDD198	1.04149	0.29769	1
5' MAST2	GSK3ALPHABETA	1.04051	0.298141	1
3' RET	HER2_pY1248	1.04027	0.298252	1
5' EPS15L1	PEA15	-1.03854	0.29906	1
5' VPS13B	DJ1	-1.03781	0.299399	1
5' ANK3	BAK	-1.0362	0.300149	1
5' MED26	FOXO3A_pS318S321	-1.03566	0.300401	1
5' ZDHHC17	CYCLIND1	1.0355	0.300474	1
5' ERBB2	ECADHERIN	1.03523	0.300599	1
5' MAST2	STAT3_pY705	-1.03444	0.300968	1
5' EGFR	ATM	1.03412	0.301121	1
5' ERBB2	S6_pS235S236	-1.03379	0.301275	1
5' EPS15L1	CYCLINB1	1.0337	0.301317	1
5' PPP1R12A	PKCALPHA	1.03341	0.301453	1
5' EGFR	HER2	-1.03236	0.301941	1
3' RET	ARID1A	-1.03095	0.30265	1
5' EPS15L1	SMAD3	-1.02992	0.303087	1
5' VPS13B	ACC1	1.02991	0.30309	1
5' MED26	PCNA	1.02849	0.303758	1
5' MAST2	MEK1_pS217S221	-1.02748	0.304234	1
5' ZDHHC17	MSH2	1.0263	0.304789	1
5' ERG	S6_pS235S236	1.02522	0.305298	1
3' RET	P70S6K	-1.02413	0.30581	1
5' RAF1	STAT3_pY705	-1.02384	0.30595	1
5' ZDHHC17	CLAUDIN7	-1.02376	0.305989	1
5' MED26	CHK1	-1.02366	0.306034	1
5' EPS15L1	SMAD4	1.02328	0.306215	1
5' CCDC6	CAVEOLIN1	1.02242	0.306621	1
5' ANK3	RB_pS807S811	1.02215	0.306747	1
5' ANK3	JNK_pT183Y185	-1.0221	0.306774	1
5' EPS15L1	MYOSINIIA_pS1943	-1.0215	0.307057	1
5' TBCD	HER2	1.02117	0.307214	1
5' EML4	P62LCKLIGAND	1.01959	0.307962	1
5' ANK3	NRAS	-1.01889	0.308292	1
5' MAST2	LCK	1.01828	0.308581	1
5' EPS15L1	YB1	-1.01732	0.309041	1
5' VPS13B	SF2	-1.01721	0.309093	1
5' CCDC6	PKCALPHA	-1.01573	0.309798	1
5' RAF1	PI3KP110ALPHA	-1.01555	0.309881	1
5' NF1	PDCD4	-1.01494	0.310175	1
5' WNK1	GAPDH	1.01454	0.310363	1
5' RAF1	HEREGULIN	-1.01451	0.310376	1
5' EPS15L1	ACC1	-1.01426	0.310496	1
5' MED26	MSH2	1.01306	0.311069	1
5' MAST2	PAXILLIN	1.01273	0.311229	1
5' ERG	SF2	-1.01215	0.311505	1
5' ZDHHC17	AKT_pT308	-1.01176	0.311691	1
5' VPS13B	X1433BETA	-1.0109	0.312102	1
5' PPP1R12A	BECLIN	1.01087	0.312116	1
5' VPS13B	CRAF	-1.01028	0.312401	1
5' ZDHHC17	MYH11	-1.01016	0.312457	1
5' ERBB2	BCLXL	-1.00988	0.31259	1
5' ERBB2	CLAUDIN7	1.00977	0.312642	1
5' ERBB2	NRAS	1.00885	0.313085	1
5' WNK1	P90RSK_pT359S363	-1.00884	0.313092	1
5' RAF1	CYCLINB1	-1.0088	0.313109	1
5' ANK3	FASN	1.00724	0.313855	1
5' CCDC6	S6_pS240S244	-1.00713	0.313912	1
5' EGFR	CMET_pY1235	-1.00688	0.314031	1
5' EPS15L1	CYCLIND1	-1.00371	0.315555	1
5' VPS13B	CYCLINE1	-1.00358	0.315621	1
5' ARID1A	X4EBP1_pT37T46	-1.00145	0.316647	1
5' ARID1A	CYCLINB1	-1.00131	0.316715	1
5' ANK3	RAD51	-1.00075	0.316984	1
5' WNK1	ETS1	1.0006	0.317057	1
5' ZDHHC17	SF2	-1.00038	0.317166	1
5' EPS15L1	YAP_pS127	-0.999128	0.317771	1
5' ARID1A	CASPASE7CLEAVEDD198	0.998898	0.317882	1
5' VPS13B	CYCLINE2	-0.998068	0.318284	1
5' RAF1	NCADHERIN	-0.998006	0.318314	1
5' RAF1	EGFR_pY1068	-0.996822	0.318889	1
5' NF1	PR	-0.996601	0.318996	1
3' RET	CLAUDIN7	-0.996451	0.319069	1
5' EML4	NRAS	0.995715	0.319426	1
5' ARID1A	YAP_pS127	-0.994771	0.319885	1
5' NF1	P38_pT180Y182	-0.992849	0.320821	1
5' MED26	X1433EPSILON	0.992619	0.320933	1
5' PPP1R12A	CMYC	-0.9922	0.321137	1
5' WNK1	CD31	-0.990881	0.321781	1
5' VPS13B	SRC_pY416	0.990294	0.322068	1
5' TBCD	PAI1	-0.989131	0.322637	1
5' CCDC6	DIRAS3	-0.989115	0.322644	1
5' EGFR	LKB1	-0.987775	0.3233	1
5' MED26	S6_pS240S244	-0.98737	0.323499	1
5' ERBB2	LKB1	-0.986845	0.323756	1
5' EGFR	CASPASE7CLEAVEDD198	0.986324	0.324012	1
5' ERG	SMAD3	-0.985845	0.324246	1
5' EGFR	PEA15_pS116	0.985594	0.32437	1
5' ERBB2	MSH2	0.985279	0.324524	1
5' TBCD	P70S6K	0.983765	0.325268	1
5' ANK3	CMET_pY1235	-0.983478	0.32541	1
5' EML4	XRCC1	-0.983416	0.32544	1
5' ERG	P62LCKLIGAND	-0.983057	0.325617	1
5' CCDC6	COLLAGENVI	-0.982216	0.326031	1
5' TBCD	STATHMIN	-0.980981	0.326639	1
5' ANK3	TAZ	-0.979677	0.327282	1
5' PPP1R12A	ETS1	0.979381	0.327429	1
5' ERBB2	CHK1_pS345	-0.978689	0.327771	1
5' PPP1R12A	NCADHERIN	-0.977717	0.328251	1
5' MAST2	P70S6K	0.977688	0.328266	1
5' WNK1	MRE11	-0.977552	0.328333	1
5' ZDHHC17	MEK1_pS217S221	0.977217	0.328499	1
3' RET	P27_pT198	-0.977203	0.328506	1
5' ARID1A	TUBERIN	-0.976951	0.32863	1
5' ERG	PREX1	0.976901	0.328655	1
5' NF1	ATM	0.975873	0.329164	1
3' RET	VEGFR2	0.974817	0.329688	1
5' ERBB2	GSK3ALPHABETA_pS21S9	-0.973442	0.33037	1
5' EGFR	VHL	-0.973262	0.33046	1
5' ERG	EEF2K	-0.972341	0.330918	1
5' ANK3	ERK2	0.971418	0.331377	1
5' VPS13B	GSK3ALPHABETA_pS21S9	0.971292	0.331439	1
5' ERG	PKCDELTA_pS664	0.971281	0.331445	1
5' ARID1A	SYK	-0.971023	0.331574	1
5' MED26	PDK1_pS241	0.970537	0.331815	1
5' WNK1	EGFR_pY1068	-0.970041	0.332063	1
5' ERG	CYCLINB1	-0.969539	0.332313	1
5' EPS15L1	PCNA	0.969216	0.332474	1
5' ERBB2	RAD50	-0.967416	0.333373	1
5' WNK1	TAZ	-0.967395	0.333383	1
5' ERBB2	PR	-0.966965	0.333598	1
5' MED26	KU80	0.966855	0.333653	1
5' ERG	FOXO3A_pS318S321	-0.965954	0.334104	1
5' VPS13B	TRANSGLUTAMINASE	-0.965404	0.334379	1
5' RAF1	HER2_pY1248	-0.96482	0.334671	1
5' RAF1	P27	-0.96388	0.335143	1
5' EGFR	PAI1	-0.962555	0.335807	1
5' EML4	PCNA	-0.96226	0.335955	1
5' ARID1A	NFKBP65_pS536	-0.961931	0.336121	1
5' CCDC6	RBM15	0.961745	0.336214	1
5' ERG	TTF1	-0.960956	0.336666	1
5' CCDC6	PTEN	0.960737	0.336721	1
5' RAF1	X4EBP1_pS65	-0.960712	0.336733	1
5' NF1	SRC_pY416	-0.960655	0.336762	1
5' WNK1	YAP	-0.960641	0.336769	1
5' RAF1	HER3	-0.960553	0.336813	1
5' CCDC6	EIF4G	0.960409	0.336886	1
5' EGFR	ERK2	0.959819	0.337182	1
5' CCDC6	TUBERIN	0.958514	0.33784	1
5' TBCD	CHK2	0.958343	0.337926	1
5' NF1	AKT_pT308	-0.958251	0.337973	1
5' MAST2	S6_pS240S244	-0.957962	0.338118	1
5' EGFR	MYOSINIIA_pS1943	0.956373	0.33892	1
5' ZDHHC17	EIF4G	0.955396	0.339414	1
5' ARID1A	CD31	-0.953567	0.340339	1
5' RAF1	CASPASE7CLEAVEDD198	-0.953553	0.340346	1
5' VPS13B	PCNA	-0.953262	0.340493	1
3' RET	ACC_pS79	-0.953124	0.340563	1
5' PPP1R12A	PI3KP85	0.952971	0.340641	1
5' EML4	FOXO3A	0.952909	0.340672	1
5' EPS15L1	LKB1	0.952887	0.340683	1
5' EGFR	CHK1_pS345	0.952828	0.340713	1
5' RAF1	MTOR	0.952798	0.340728	1
5' CCDC6	CYCLINB1	-0.952105	0.34108	1
5' TBCD	ERALPHA	0.951634	0.341318	1
5' PPP1R12A	FOXM1	0.950821	0.341731	1
5' MED26	PR	-0.949679	0.342311	1
5' MAST2	CYCLINE1	0.949495	0.342405	1
5' ZDHHC17	EIF4E	0.949254	0.342527	1
5' EGFR	CD31	-0.949238	0.342535	1
5' PPP1R12A	PKCALPHA_pS657	0.948955	0.342679	1
5' EGFR	PARP1	-0.9483	0.343159	1
5' ARID1A	BID	0.945451	0.344464	1
5' EGFR	X1433ZETA	-0.944742	0.344826	1
5' CCDC6	P27_pT198	-0.944739	0.344828	1
5' PPP1R12A	X1433ZETA	-0.944269	0.345068	1
5' EPS15L1	MTOR	-0.944251	0.345077	1
5' ZDHHC17	AKT_pS473	-0.943913	0.34525	1
5' EGFR	JAB1	-0.943234	0.345743	1
5' TBCD	CAVEOLIN1	0.942265	0.346093	1
5' EGFR	BID	-0.940953	0.346764	1
5' TBCD	PR	-0.94078	0.346853	1
5' ANK3	P70S6K	0.939794	0.347359	1
5' RAF1	BRCA2	-0.938945	0.3478	1
5' ANK3	PR	-0.938289	0.348131	1
5' VPS13B	TAZ	-0.938269	0.348142	1
5' RAF1	VHL	-0.938026	0.348266	1
5' TBCD	MSH6	0.937749	0.348409	1
5' WNK1	MAPK_pT202Y204	-0.93726	0.34866	1
5' ARID1A	P27	-0.936723	0.348937	1
5' ZDHHC17	X1433ZETA	-0.936721	0.348937	1
5' NF1	EGFR	0.936192	0.34921	1
5' ERG	NOTCH1	-0.93553	0.349551	1
5' VPS13B	PEA15_pS116	-0.934568	0.350046	1
5' CCDC6	P62LCKLIGAND	-0.934457	0.350103	1
5' EPS15L1	PAXILLIN	-0.934199	0.350236	1
5' ERBB2	TSC1	0.93397	0.350355	1
5' MAST2	CD49B	-0.933765	0.35046	1
5' ERBB2	HEREGULIN	-0.933267	0.350717	1
5' NF1	HER3	-0.930993	0.351892	1
5' WNK1	DJ1	-0.930942	0.351918	1
5' VPS13B	BETACATENIN	-0.929988	0.352413	1
5' RAF1	AKT_pS473	0.928964	0.352943	1
5' MED26	RICTOR_pT1135	-0.928587	0.353138	1
5' ARID1A	DIRAS3	0.928498	0.353184	1
5' EML4	KU80	0.92814	0.35337	1
5' ERG	P70S6K	-0.927292	0.35381	1
5' TBCD	ETS1	0.925705	0.354634	1
5' EML4	RAB25	0.925545	0.354718	1
5' RAF1	ACVRL1	-0.925161	0.354917	1
5' EGFR	HEREGULIN	-0.924266	0.355383	1
5' ZDHHC17	MIG6	-0.923022	0.356031	1
3' RET	LKB1	-0.921657	0.356742	1
5' EGFR	DJ1	-0.921355	0.3569	1
5' VPS13B	TFRC	-0.920934	0.35712	1
5' PPP1R12A	HER3	-0.919727	0.35775	1
5' TBCD	GSK3_pS9	-0.919383	0.35793	1
5' NF1	GSK3_pS9	-0.918351	0.35847	1
5' PPP1R12A	BAX	-0.91767	0.358826	1
3' RET	TAZ	0.917409	0.358963	1
5' EML4	STAT5ALPHA	0.917085	0.359133	1
5' ERBB2	PRDX1	-0.916237	0.359577	1
5' TBCD	CKIT	-0.916208	0.359592	1
5' RAF1	DVL3	-0.916129	0.359634	1
5' EPS15L1	PDCD4	0.914815	0.360323	1
5' MED26	TTF1	-0.914419	0.360584	1
5' CCDC6	BIM	-0.914133	0.360681	1
5' ERBB2	CYCLIND1	-0.914017	0.360742	1
5' EPS15L1	X4EBP1_pS65	0.913628	0.360947	1
5' PPP1R12A	SYK	-0.913581	0.360972	1
5' NF1	RAB11	0.913431	0.361051	1
5' WNK1	ERALPHA_pS118	0.913401	0.361066	1
5' TBCD	ARAF_pS299	-0.912543	0.361517	1
5' EML4	MEK1	0.912137	0.361731	1
5' PPP1R12A	BAK	0.91173	0.361945	1
5' PPP1R12A	EEF2K	-0.911181	0.362234	1
5' TBCD	YB1	0.910496	0.362595	1
5' ERBB2	P90RSK	0.910297	0.3627	1
5' MAST2	DJ1	0.909537	0.363101	1
3' RET	VHL	-0.90858	0.363606	1
5' ZDHHC17	PAXILLIN	0.908435	0.363683	1
5' ARID1A	ARAF_pS299	-0.908061	0.36388	1
5' TBCD	NRAS	0.907965	0.363931	1
3' RET	PAI1	-0.90718	0.364346	1
5' EGFR	AKT	0.907127	0.364374	1
5' PPP1R12A	P38_pT180Y182	-0.906613	0.364646	1
5' PPP1R12A	FIBRONECTIN	0.906475	0.364719	1
5' PPP1R12A	RAD50	-0.90587	0.365039	1
5' WNK1	STAT3_pY705	-0.905563	0.365201	1
5' ERG	MSH2	-0.905552	0.365207	1
5' EML4	NF2	-0.905384	0.365296	1
5' NF1	ALPHACATENIN	0.905379	0.365351	1
5' ZDHHC17	GSK3ALPHABETA	0.90523	0.365378	1
5' RAF1	P90RSK	0.904907	0.365549	1
5' NF1	SRC_pY527	-0.904889	0.365558	1
5' EML4	ACETYLATUBULINLYS40	0.903801	0.366135	1
5' EML4	RAD51	-0.903143	0.366484	1
5' TBCD	ECADHERIN	-0.903094	0.36651	1
5' MAST2	BETACATENIN	0.902873	0.366627	1
5' EGFR	COLLAGENVI	-0.902722	0.366707	1
5' PPP1R12A	CHK2_pT68	0.901914	0.367136	1
3' RET	ALPHACATENIN	0.899803	0.368311	1
5' ZDHHC17	RAB25	0.898295	0.369062	1
5' RAF1	CHK1	0.898111	0.36916	1
5' RAF1	NF2	0.897969	0.369236	1
5' WNK1	YAP_pS127	-0.897814	0.369319	1
5' ARID1A	YAP	-0.895095	0.37077	1
3' RET	RBM15	0.89464	0.371013	1
5' WNK1	PI3KP85	0.893651	0.371542	1
5' ERG	ASNS	-0.892692	0.372056	1
5' MAST2	PRAS40_pT246	-0.891741	0.372565	1
5' MED26	TAZ	0.8905	0.373231	1
5' WNK1	PKCALPHA	0.889812	0.3736	1
5' MED26	YB1	-0.889283	0.373885	1
5' VPS13B	PRAS40_pT246	0.888872	0.374105	1
5' ARID1A	RB_pS807S811	-0.888053	0.374546	1
5' EPS15L1	VEGFR2	-0.887914	0.37462	1
5' CCDC6	GSK3ALPHABETA	0.885813	0.375752	1
5' TBCD	GATA3	0.885594	0.37587	1
5' ANK3	BCLXL	-0.885438	0.375954	1
5' VPS13B	YB1	-0.885276	0.376041	1
5' PPP1R12A	KU80	-0.88478	0.376309	1
5' MAST2	VHL	0.884216	0.376613	1
5' ERBB2	SRC	0.884001	0.376729	1
5' TBCD	PKCDELTA_pS664	-0.882829	0.377362	1
5' EPS15L1	BID	0.882545	0.377515	1
5' MED26	EGFR	0.882475	0.377553	1
5' ARID1A	BAD_pS112	-0.882076	0.377769	1
5' TBCD	INPP4B	-0.881899	0.377865	1
5' MAST2	ATM	0.881746	0.377947	1
5' MAST2	PKCALPHA_pS657	0.880096	0.378841	1
5' VPS13B	YB1_pS102	0.878497	0.379707	1
5' EPS15L1	TUBERIN	-0.878448	0.379733	1
5' RAF1	X1433BETA	-0.877998	0.379978	1
5' ERG	CDK1	-0.877824	0.380072	1
5' ERG	ANNEXINVII	0.876971	0.380536	1
5' ERG	BRCA2	-0.876935	0.38056	1
5' TBCD	RAPTOR	0.876834	0.38061	1
5' MED26	SMAD4	-0.876245	0.38093	1
5' NF1	ADAR1	0.87539	0.381445	1
5' TBCD	SMAD4	0.87526	0.381465	1
5' TBCD	P27_pT157	-0.874845	0.381691	1
5' EPS15L1	PKCALPHA_pS657	-0.8741	0.382097	1
5' ARID1A	GSK3ALPHABETA_pS21S9	-0.872873	0.382765	1
5' MAST2	STAT5ALPHA	0.872533	0.38295	1
5' PPP1R12A	RAB11	-0.872088	0.383193	1
5' TBCD	CRAF_pS338	-0.871674	0.383419	1
5' TBCD	ACETYLATUBULINLYS40	0.871366	0.383587	1
5' MED26	PCADHERIN	0.871054	0.383757	1
5' MED26	MAPK_pT202Y204	-0.87009	0.384284	1
5' MAST2	ACVRL1	-0.869395	0.384664	1
5' ERBB2	STATHMIN	-0.868589	0.385105	1
5' ARID1A	FOXM1	-0.868551	0.385125	1
5' EML4	HER3	0.868494	0.385157	1
5' ANK3	NDRG1_pT346	0.867224	0.385852	1
5' ANK3	MRE11	-0.867112	0.385913	1
5' CCDC6	ETS1	0.866764	0.386104	1
5' NF1	PEA15_pS116	-0.866731	0.386122	1
5' VPS13B	TUBERIN_pT1462	0.866423	0.386291	1
5' ERBB2	RICTOR	-0.8653	0.386906	1
5' ERBB2	NFKBP65_pS536	0.865047	0.387045	1
5' PPP1R12A	PI3KP110ALPHA	0.864662	0.387257	1
5' PPP1R12A	X53BP1	-0.86439	0.387406	1
5' WNK1	PEA15_pS116	0.864268	0.387473	1
5' EML4	PKCALPHA	0.864048	0.387594	1
5' VPS13B	CMET_pY1235	-0.864017	0.387611	1
5' NF1	GSK3ALPHABETA_pS21S9	-0.86333	0.387989	1
5' MAST2	ANNEXINVII	0.862726	0.38832	1
5' MAST2	RBM15	0.861951	0.388747	1
5' NF1	TSC1	0.860398	0.389602	1
5' MAST2	CJUN_pS73	0.860323	0.389643	1
5' EPS15L1	CJUN_pS73	0.85972	0.389976	1
5' ARID1A	TFRC	0.859243	0.390238	1
5' EPS15L1	SCD1	-0.858562	0.390615	1
5' NF1	INPP4B	0.858293	0.390763	1
5' PPP1R12A	CHK1	-0.858257	0.390782	1
5' MED26	G6PD	0.857495	0.391204	1
5' TBCD	PREX1	0.857398	0.391257	1
5' ZDHHC17	PEA15	-0.855707	0.392192	1
5' CCDC6	PDK1	-0.855075	0.392542	1
5' ARID1A	PKCDELTA_pS664	-0.854364	0.392935	1
5' EGFR	X4EBP1_pT70	-0.854135	0.393062	1
5' ZDHHC17	PKCPANBETAII_pS660	0.852819	0.393792	1
5' EML4	CD49B	-0.850779	0.394924	1
5' MED26	SRC_pY527	0.850552	0.39505	1
5' TBCD	PCNA	-0.85023	0.395229	1
5' EML4	VEGFR2	0.850216	0.395237	1
5' CCDC6	BAP1C4	-0.849425	0.395677	1
5' MED26	PTEN	-0.848205	0.396356	1
5' MAST2	EEF2K	0.847587	0.3967	1
5' ERG	ANNEXIN1	0.847078	0.396983	1
5' VPS13B	HSP70	-0.846215	0.397464	1
5' WNK1	BRCA2	-0.845997	0.397591	1
3' RET	GAPDH	0.844829	0.398238	1
5' RAF1	ARAF_pS299	-0.844737	0.398289	1
5' ARID1A	RAB25	0.843588	0.398931	1
5' WNK1	CKIT	-0.843232	0.39913	1
5' EPS15L1	S6_pS240S244	-0.843148	0.399177	1
5' EPS15L1	P70S6K	-0.842019	0.399809	1
5' ANK3	CD49B	-0.841979	0.399831	1
5' PPP1R12A	S6_pS240S244	0.841285	0.40022	1
5' TBCD	MYOSINIIA_pS1943	0.840284	0.40078	1
5' ANK3	S6	0.839776	0.401065	1
5' ARID1A	HSP70	0.839341	0.401309	1
5' EPS15L1	P90RSK	0.838462	0.401802	1
5' PPP1R12A	TFRC	-0.838154	0.401976	1
5' ERBB2	MTOR	0.838016	0.402053	1
5' ERBB2	ERCC1	-0.837902	0.402117	1
5' NF1	FIBRONECTIN	0.837797	0.402176	1
5' CCDC6	ERALPHA	-0.835874	0.403257	1
5' ZDHHC17	YB1_pS102	-0.833956	0.404337	1
5' VPS13B	NDRG1_pT346	0.833105	0.404817	1
5' TBCD	P53	-0.832772	0.405005	1
5' ANK3	BAD_pS112	0.832609	0.405097	1
5' NF1	BCLXL	-0.831962	0.405461	1
5' ZDHHC17	MTOR_pS2448	0.831674	0.405624	1
5' WNK1	PR	0.830513	0.40628	1
5' ERBB2	P27_pT198	-0.830467	0.406306	1
5' ERG	PR	-0.83035	0.406372	1
5' RAF1	P38MAPK	-0.829445	0.406884	1
5' MAST2	FOXO3A	-0.828471	0.407435	1
5' RAF1	GSK3_pS9	0.828218	0.407578	1
5' ANK3	MIG6	-0.828132	0.407627	1
5' ZDHHC17	BAX	-0.828028	0.407685	1
5' ERBB2	PI3KP110ALPHA	0.827996	0.407704	1
5' ANK3	RAB11	-0.827776	0.407828	1
5' ARID1A	MEK1_pS217S221	-0.827186	0.408163	1
5' VPS13B	CKIT	-0.826892	0.408329	1
5' ZDHHC17	LKB1	0.825752	0.408976	1
5' ARID1A	X1433ZETA	0.825716	0.408996	1
5' EGFR	CKIT	0.824919	0.409448	1
5' ANK3	PCADHERIN	0.823959	0.409994	1
5' MED26	BECLIN	-0.82381	0.410078	1
5' ERG	RBM15	-0.823649	0.41017	1
5' ARID1A	MAPK_pT202Y204	-0.823146	0.410456	1
5' RAF1	NRAS	-0.822791	0.410657	1
5' ERG	PCADHERIN	-0.82279	0.410658	1
5' MED26	PRDX1	0.822724	0.410695	1
5' EGFR	S6_pS235S236	0.822564	0.410787	1
5' ERG	ACC_pS79	-0.821353	0.411476	1
5' WNK1	PDK1_pS241	-0.821118	0.41161	1
5' TBCD	RB_pS807S811	-0.821	0.411677	1
5' ARID1A	HER2_pY1248	0.820858	0.411758	1
5' RAF1	MYOSINIIA_pS1943	-0.818796	0.412933	1
5' EPS15L1	GSK3ALPHABETA	-0.817353	0.413757	1
5' NF1	ANNEXINVII	0.816834	0.414054	1
5' EML4	CYCLIND1	-0.816243	0.414391	1
5' WNK1	AMPK_pT172	0.815963	0.414552	1
5' TBCD	AKT_pT308	-0.815279	0.414943	1
5' EGFR	BAP1C4	0.813423	0.416006	1
5' WNK1	PAI1	0.812253	0.416677	1
5' CCDC6	ACC_pS79	-0.812231	0.416689	1
5' VPS13B	XRCC1	-0.811298	0.417225	1
5' EML4	ANNEXINVII	0.80881	0.418654	1
3' RET	GAB2	0.808407	0.418887	1
5' RAF1	TUBERIN	0.807551	0.419379	1
5' MED26	PRAS40_pT246	-0.807061	0.419661	1
5' RAF1	YAP	-0.80701	0.419691	1
5' ERBB2	PTEN	0.806908	0.419749	1
5' PPP1R12A	CRAF_pS338	0.806762	0.419834	1
5' WNK1	NF2	-0.805939	0.420308	1
3' RET	TRANSGLUTAMINASE	0.803946	0.421458	1
3' RET	ATM	0.803709	0.421595	1
5' MED26	P53	0.802651	0.422206	1
5' CCDC6	EGFR	0.802062	0.422547	1
5' RAF1	ETS1	0.801621	0.422802	1
5' RAF1	S6_pS235S236	0.801478	0.422885	1
5' EPS15L1	AKT	-0.801395	0.422933	1
5' ERG	CLAUDIN7	-0.80138	0.422941	1
5' ERBB2	P21	-0.801199	0.423047	1
5' ERBB2	ERALPHA_pS118	-0.800783	0.423287	1
5' RAF1	BAP1C4	-0.80075	0.423306	1
5' MAST2	BID	-0.799999	0.423741	1
5' ZDHHC17	HSP70	-0.799301	0.424146	1
5' ANK3	BCL2	0.797978	0.424913	1
5' EPS15L1	RAD50	-0.796327	0.425871	1
5' MED26	X1433BETA	-0.793994	0.427228	1
5' EPS15L1	NFKBP65_pS536	0.793766	0.427361	1
5' VPS13B	SMAD3	-0.793676	0.427414	1
5' ARID1A	AMPK_pT172	0.792945	0.427839	1
5' ERBB2	ETS1	-0.792929	0.427849	1
5' EGFR	SMAD3	-0.7927	0.427982	1
5' WNK1	X4EBP1_pS65	0.791571	0.42864	1
5' NF1	RAB25	-0.790888	0.429039	1
5' MAST2	SMAD3	0.790699	0.429149	1
5' EPS15L1	STAT5ALPHA	-0.790195	0.429443	1
5' MED26	SCD1	0.789832	0.429655	1
5' EGFR	MRE11	-0.789373	0.429923	1
5' RAF1	EEF2K	-0.788316	0.430541	1
5' RAF1	PEA15_pS116	-0.787311	0.431129	1
5' RAF1	X4EBP1	-0.785937	0.431934	1
5' NF1	ASNS	0.785047	0.432455	1
5' ZDHHC17	P53	0.784993	0.432487	1
5' MAST2	CRAF_pS338	-0.7842	0.432952	1
5' ERBB2	YB1	-0.784116	0.433001	1
5' ANK3	NFKBP65_pS536	0.783703	0.433244	1
5' MED26	SYK	0.783547	0.433335	1
5' TBCD	COLLAGENVI	-0.783218	0.433528	1
5' ARID1A	DVL3	-0.782221	0.434114	1
5' ERBB2	JNK_pT183Y185	-0.781875	0.434317	1
5' RAF1	RAD51	-0.781388	0.434603	1
3' RET	MYH11	-0.781345	0.434629	1
5' EML4	GSK3ALPHABETA	-0.779808	0.435533	1
5' EGFR	PKCALPHA_pS657	0.779415	0.435764	1
5' ANK3	RICTOR	-0.778417	0.436352	1
3' RET	CDK1	-0.777955	0.436625	1
5' TBCD	G6PD	0.777447	0.436924	1
5' NF1	ECADHERIN	-0.777425	0.436937	1
5' NF1	SMAD4	0.777342	0.436986	1
5' ERG	MYOSINIIA_pS1943	0.776188	0.437667	1
3' RET	CHK2	0.7753	0.438191	1
5' WNK1	PDK1	-0.774602	0.438603	1
5' WNK1	CDK1	-0.773031	0.439532	1
5' NF1	BRAF	0.770875	0.44081	1
5' ERG	X1433EPSILON	-0.770872	0.440811	1
5' MED26	IRS1	-0.770495	0.441035	1
5' ERBB2	FOXO3A	0.770227	0.441194	1
5' EPS15L1	SHC_pY317	-0.767939	0.442552	1
5' WNK1	ERALPHA	0.767377	0.442886	1
5' EML4	X4EBP1_pS65	-0.766664	0.443309	1
5' PPP1R12A	INPP4B	0.766653	0.443316	1
5' ZDHHC17	IGFBP2	-0.766136	0.443624	1
5' EPS15L1	RAB11	0.765634	0.443923	1
5' NF1	HER2	-0.765503	0.444	1
5' TBCD	S6	0.764897	0.444361	1
5' EGFR	CRAF	-0.763489	0.4452	1
5' ERBB2	CASPASE7CLEAVEDD198	-0.763431	0.445235	1
5' NF1	EGFR_pY1173	-0.762722	0.445657	1
5' VPS13B	P90RSK_pT359S363	-0.762196	0.445971	1
5' ANK3	TFRC	0.76219	0.445975	1
5' VPS13B	EGFR_pY1068	-0.761904	0.446145	1
5' CCDC6	AMPKALPHA	0.761692	0.446272	1
5' ZDHHC17	CASPASE7CLEAVEDD198	0.761366	0.446467	1
5' EGFR	RBM15	0.761082	0.446636	1
5' MAST2	GATA3	0.760385	0.447053	1
5' TBCD	BCLXL	-0.760041	0.447258	1
5' MED26	PREX1	0.759715	0.447453	1
5' EML4	ERK2	0.759474	0.447597	1
5' MED26	NRAS	0.758735	0.448039	1
5' ERG	SMAD1	-0.758263	0.448321	1
5' EGFR	SMAD1	0.758031	0.44846	1
5' RAF1	X53BP1	-0.75729	0.448904	1
3' RET	CASPASE7CLEAVEDD198	-0.756691	0.449263	1
5' ZDHHC17	BCL2	0.756425	0.449423	1
5' VPS13B	CAVEOLIN1	-0.755206	0.450153	1
5' VPS13B	ACVRL1	-0.754456	0.450603	1
5' ERG	BAD_pS112	0.753957	0.450903	1
5' ARID1A	JNK_pT183Y185	-0.75361	0.451111	1
5' PPP1R12A	DIRAS3	0.752744	0.451631	1
5' PPP1R12A	CIAP	0.75273	0.45164	1
3' RET	YAP	0.752706	0.451654	1
5' MAST2	EGFR	0.752442	0.451813	1
5' WNK1	MYOSINIIA_pS1943	-0.751933	0.452119	1
5' EGFR	CYCLIND1	0.751916	0.452129	1
5' ANK3	PDCD4	0.751539	0.452356	1
5' CCDC6	PAI1	-0.751358	0.452465	1
5' EML4	CYCLINE1	-0.751065	0.452641	1
5' ANK3	VEGFR2	0.751057	0.452646	1
5' CCDC6	BAX	0.750753	0.452829	1
5' ARID1A	STATHMIN	-0.750225	0.453147	1
5' MED26	DVL3	-0.749769	0.453421	1
5' TBCD	SMAD3	0.749459	0.453608	1
5' EGFR	P70S6K	0.748295	0.45431	1
5' EML4	SYK	-0.746162	0.455597	1
5' ANK3	AKT	0.745373	0.456074	1
5' EGFR	ADAR1	-0.745371	0.456117	1
5' ANK3	MYH11	-0.744862	0.456383	1
5' MED26	P90RSK	0.744538	0.456578	1
5' ERBB2	GATA3	-0.744351	0.456692	1
5' EGFR	DVL3	0.744118	0.456832	1
5' MAST2	PTEN	0.743392	0.457272	1
5' ERBB2	KU80	0.743131	0.45743	1
5' VPS13B	CHK1_pS345	-0.74312	0.457436	1
5' ERG	EGFR	-0.742771	0.457648	1
5' EML4	YB1_pS102	0.742439	0.457848	1
5' ZDHHC17	CYCLINE1	-0.742396	0.457874	1
5' CCDC6	GATA3	-0.742156	0.45802	1
5' CCDC6	ECADHERIN	-0.742025	0.458099	1
5' ANK3	PKCALPHA_pS657	0.741924	0.45816	1
5' WNK1	GSK3ALPHABETA	-0.741121	0.458648	1
5' RAF1	X1433ZETA	-0.740595	0.458966	1
5' NF1	PDK1_pS241	0.740223	0.459192	1
5' WNK1	P27	-0.739781	0.45946	1
5' ANK3	PEA15_pS116	-0.739134	0.459853	1
5' ERG	PDK1	-0.737939	0.460579	1
5' RAF1	MTOR_pS2448	0.735975	0.461773	1
5' MAST2	CD31	-0.735892	0.461824	1
5' CCDC6	P27_pT157	-0.735809	0.461874	1
5' WNK1	BETACATENIN	-0.735631	0.461982	1
5' NF1	ERK2	-0.735365	0.462144	1
5' RAF1	NOTCH1	-0.734172	0.462871	1
5' CCDC6	XRCC1	-0.733962	0.462999	1
5' RAF1	P53	-0.733843	0.463071	1
5' ARID1A	ANNEXINVII	-0.733426	0.463326	1
5' EGFR	SMAC	-0.733267	0.463423	1
5' PPP1R12A	MSH6	-0.733194	0.463467	1
5' PPP1R12A	SRC	-0.732743	0.463742	1
5' ERBB2	PKCPANBETAII_pS660	0.73178	0.46433	1
5' TBCD	AR	0.730621	0.465037	1
5' ARID1A	GSK3_pS9	-0.730391	0.465178	1
5' ERG	PAXILLIN	-0.730224	0.46528	1
5' ERBB2	ADAR1	0.730168	0.465355	1
5' ERBB2	TTF1	0.730026	0.465442	1
5' TBCD	XBP1	-0.72971	0.465594	1
5' RAF1	FOXO3A	-0.729695	0.465604	1
5' NF1	P27_pT198	-0.729576	0.465676	1
5' ERG	CKIT	0.729527	0.465706	1
5' ZDHHC17	BID	-0.728966	0.466049	1
5' CCDC6	PCNA	-0.728718	0.466201	1
5' EPS15L1	CMET_pY1235	0.72864	0.466249	1
5' ANK3	GSK3ALPHABETA	0.728548	0.466305	1
5' EML4	TUBERIN_pT1462	0.727805	0.46676	1
5' PPP1R12A	P90RSK_pT359S363	0.726839	0.467351	1
5' EPS15L1	CIAP	-0.726834	0.467354	1
5' ANK3	FOXO3A_pS318S321	0.726736	0.467414	1
5' ANK3	PDK1	-0.726686	0.467445	1
5' VPS13B	PKCDELTA_pS664	-0.726489	0.467565	1
5' WNK1	ACETYLATUBULINLYS40	-0.726063	0.467827	1
5' CCDC6	DJ1	0.725521	0.468159	1
5' PPP1R12A	BETACATENIN	-0.724927	0.468523	1
5' TBCD	FOXO3A	-0.724791	0.468607	1
5' EML4	JNK2	0.724669	0.468682	1
5' ARID1A	EGFR_pY1068	0.724485	0.468795	1
5' MAST2	ARID1A	-0.724463	0.468838	1
5' TBCD	CD49B	0.724065	0.469052	1
5' EML4	PEA15_pS116	0.723972	0.469109	1
5' MED26	SMAD3	-0.723814	0.469207	1
5' RAF1	INPP4B	-0.723463	0.469422	1
5' NF1	P38MAPK	-0.722875	0.469783	1
5' EGFR	GATA3	-0.721996	0.470323	1
5' ANK3	HSP70	-0.721889	0.470389	1
5' EML4	MTOR_pS2448	0.719856	0.47164	1
5' ARID1A	ARID1A	-0.719803	0.471703	1
5' CCDC6	SRC_pY416	-0.718801	0.47229	1
5' WNK1	RAB25	-0.718456	0.472503	1
5' WNK1	CMYC	-0.718381	0.472548	1
5' ANK3	CKIT	-0.717385	0.473163	1
5' PPP1R12A	MSH2	0.716932	0.473442	1
5' WNK1	ACC1	-0.716853	0.473491	1
5' MAST2	AMPKALPHA	0.713852	0.475345	1
5' NF1	BIM	-0.713604	0.475498	1
5' MAST2	YB1	-0.713591	0.475506	1
5' VPS13B	MYOSINIIA_pS1943	-0.713542	0.475536	1
3' RET	GSK3_pS9	0.712806	0.475992	1
5' PPP1R12A	PAXILLIN	-0.712377	0.476257	1
5' VPS13B	VEGFR2	-0.711925	0.476537	1
5' ZDHHC17	SYK	0.711418	0.476851	1
5' RAF1	PCADHERIN	-0.710155	0.477634	1
5' MAST2	SF2	0.70942	0.47809	1
5' NF1	YB1	0.708581	0.47861	1
5' ARID1A	PDK1_pS241	-0.708095	0.478912	1
5' ANK3	SMAD1	-0.707691	0.479163	1
5' PPP1R12A	MEK1_pS217S221	0.707577	0.479234	1
5' TBCD	MAPK_pT202Y204	-0.706789	0.479723	1
5' EML4	SRC_pY527	-0.706101	0.480151	1
5' WNK1	CYCLINE1	-0.705559	0.480488	1
5' WNK1	CRAF_pS338	-0.705239	0.480687	1
5' MAST2	MSH6	0.705177	0.480726	1
5' TBCD	X4EBP1_pS65	-0.705086	0.480783	1
5' CCDC6	P70S6K_pT389	-0.704663	0.481045	1
5' ERG	NRAS	-0.703574	0.481724	1
5' ZDHHC17	VEGFR2	0.703378	0.481846	1
5' EML4	AKT_pT308	0.703017	0.48207	1
5' PPP1R12A	SMAD4	0.702952	0.482111	1
5' CCDC6	FASN	-0.702636	0.482308	1
5' ANK3	ARID1A	-0.702486	0.482431	1
5' EGFR	XBP1	-0.701773	0.482847	1
5' EPS15L1	HER3	-0.701109	0.483261	1
5' ANK3	NF2	0.700821	0.48344	1
5' ANK3	PKCDELTA_pS664	0.700787	0.483461	1
5' ARID1A	RAD51	-0.700534	0.483619	1
5' NF1	SYK	0.700113	0.483882	1
5' MAST2	X53BP1	0.699742	0.484114	1
5' WNK1	CYCLINB1	0.699193	0.484457	1
5' EML4	NDRG1_pT346	0.699112	0.484508	1
5' EML4	BRCA2	-0.698856	0.484672	1
5' PPP1R12A	STATHMIN	0.698473	0.484907	1
5' WNK1	S6_pS240S244	-0.698448	0.484923	1
5' RAF1	P27_pT198	-0.697773	0.485345	1
5' PPP1R12A	CMET_pY1235	0.697299	0.485641	1
5' EGFR	P70S6K_pT389	-0.697155	0.485731	1
5' NF1	P21	0.696339	0.486242	1
5' WNK1	EIF4E	-0.696023	0.48644	1
5' EGFR	EEF2	-0.695789	0.486586	1
5' EPS15L1	CYCLINE1	-0.695525	0.486751	1
5' RAF1	HER3_pY1298	-0.694292	0.487524	1
5' MAST2	BECLIN	0.694166	0.487603	1
5' EPS15L1	ERCC1	-0.694077	0.487659	1
5' CCDC6	MYH11	-0.694071	0.487663	1
5' NF1	CMET_pY1235	0.693869	0.48779	1
5' MED26	VHL	-0.693707	0.487891	1
5' NF1	P90RSK_pT359S363	-0.692099	0.4889	1
5' EGFR	TAZ	-0.691992	0.488967	1
5' TBCD	ATM	0.691307	0.489398	1
5' ZDHHC17	RBM15	0.691159	0.489491	1
5' PPP1R12A	ANNEXINVII	0.690683	0.48979	1
5' ZDHHC17	P27_pT198	0.690648	0.489812	1
5' ANK3	BRCA2	-0.690282	0.490046	1
5' ERBB2	JNK2	0.689811	0.490338	1
5' RAF1	HER2	0.687894	0.491545	1
5' CCDC6	TIGAR	-0.687724	0.491652	1
5' VPS13B	VHL	-0.687289	0.491926	1
5' CCDC6	CHK2	0.686387	0.492494	1
5' CCDC6	NF2	0.68632	0.492536	1
5' ZDHHC17	HER3	-0.685928	0.492783	1
5' RAF1	XRCC1	-0.685804	0.492861	1
5' NF1	CD20	0.684396	0.49375	1
5' NF1	FASN	-0.684181	0.493886	1
5' PPP1R12A	AKT	0.683593	0.494257	1
5' MAST2	PAI1	-0.683498	0.494317	1
5' ANK3	CD20	-0.68297	0.494651	1
5' ZDHHC17	LCK	0.681346	0.495677	1
5' MED26	GAPDH	0.681217	0.495759	1
5' ERG	SRC_pY416	0.681167	0.49579	1
5' MED26	BETACATENIN	-0.680884	0.495969	1
5' ANK3	EIF4E	-0.680579	0.496162	1
5' EPS15L1	XBP1	0.680518	0.496201	1
5' PPP1R12A	YAP	0.680477	0.496227	1
5' EGFR	ANNEXINVII	-0.680094	0.49647	1
5' ERBB2	BAP1C4	0.679934	0.496571	1
5' EPS15L1	MTOR_pS2448	0.679506	0.496842	1
5' NF1	RICTOR_pT1135	-0.678289	0.497613	1
5' ARID1A	MRE11	-0.677144	0.498339	1
5' ERBB2	CHK1	-0.677058	0.498394	1
5' EPS15L1	BAD_pS112	-0.676225	0.498922	1
5' CCDC6	S6	-0.67601	0.499059	1
5' WNK1	DIRAS3	-0.675978	0.499079	1
5' ERBB2	S6	0.674747	0.499861	1
5' ZDHHC17	CD20	-0.674033	0.500315	1
5' WNK1	DVL3	-0.6738	0.500463	1
5' ERBB2	NDRG1_pT346	-0.672996	0.500974	1
5' ARID1A	CHK2	0.672535	0.501267	1
5' EGFR	LCK	-0.67195	0.50164	1
5' RAF1	MEK1_pS217S221	-0.671745	0.501771	1
5' EGFR	PCNA	-0.671475	0.501942	1
5' TBCD	CD20	-0.671328	0.502036	1
5' WNK1	PEA15	-0.671314	0.502045	1
5' RAF1	EGFR_pY1173	-0.670071	0.502837	1
5' PPP1R12A	ECADHERIN	-0.670066	0.50284	1
5' EGFR	P90RSK_pT359S363	-0.670014	0.502873	1
5' EPS15L1	CHK1	-0.66937	0.503284	1
3' RET	CJUN_pS73	0.669184	0.503402	1
5' EPS15L1	IGFBP2	-0.668692	0.503716	1
5' ZDHHC17	GAB2	0.668026	0.504141	1
5' EPS15L1	SRC_pY527	0.66787	0.504241	1
5' WNK1	XBP1	0.667008	0.504791	1
5' NF1	ARAF_pS299	0.666555	0.505081	1
5' MAST2	RAB25	0.666505	0.505112	1
5' CCDC6	PREX1	-0.666212	0.505299	1
5' VPS13B	FOXM1	0.664016	0.506704	1
5' VPS13B	PDK1_pS241	-0.663834	0.50682	1
5' RAF1	EIF4G	-0.663314	0.507154	1
5' ARID1A	BAP1C4	0.663247	0.507196	1
5' TBCD	EIF4G	0.663072	0.507308	1
5' NF1	GATA3	0.662888	0.507426	1
5' EGFR	MIG6	-0.66102	0.508624	1
5' ANK3	PAI1	-0.660634	0.508871	1
5' EGFR	ACC_pS79	0.660404	0.509018	1
5' NF1	STAT3_pY705	0.659932	0.509321	1
5' MAST2	CYCLINB1	-0.659762	0.50943	1
5' ZDHHC17	ARID1A	0.659529	0.509607	1
5' ERG	CJUN_pS73	-0.65927	0.509746	1
5' CCDC6	S6_pS235S236	-0.658045	0.510533	1
5' PPP1R12A	P38MAPK	-0.657024	0.511189	1
5' ARID1A	FOXO3A_pS318S321	-0.656048	0.511817	1
5' MED26	X4EBP1_pT37T46	-0.655239	0.512337	1
5' ERG	P38_pT180Y182	0.655144	0.512399	1
5' CCDC6	MYOSINIIA_pS1943	-0.654828	0.512602	1
5' CCDC6	BAK	-0.65449	0.51282	1
3' RET	FIBRONECTIN	-0.6544	0.512878	1
5' NF1	XBP1	-0.653806	0.51326	1
5' EPS15L1	EIF4G	-0.653713	0.51332	1
5' EML4	PAXILLIN	0.653708	0.513323	1
5' RAF1	RAB25	-0.652742	0.513946	1
5' MAST2	YB1_pS102	0.652693	0.513978	1
5' CCDC6	PKCALPHA_pS657	-0.652444	0.514138	1
5' EGFR	TTF1	-0.652084	0.514406	1
5' ZDHHC17	FOXO3A_pS318S321	-0.651774	0.514571	1
5' ARID1A	NDRG1_pT346	0.651581	0.514695	1
5' MAST2	DVL3	0.651393	0.514816	1
5' EPS15L1	CLAUDIN7	0.651375	0.514828	1
5' PPP1R12A	FASN	-0.65047	0.515412	1
5' ANK3	CLAUDIN7	-0.649814	0.515836	1
5' ARID1A	CJUN_pS73	-0.649636	0.515951	1
5' ARID1A	P70S6K_pT389	-0.649425	0.516087	1
5' TBCD	CRAF	0.649014	0.516353	1
5' VPS13B	FASN	0.648513	0.516676	1
5' ARID1A	NCADHERIN	0.648138	0.516919	1
5' PPP1R12A	EIF4E	-0.648037	0.516984	1
5' WNK1	PKCALPHA_pS657	0.648032	0.516987	1
5' VPS13B	SYK	0.647049	0.517624	1
5' PPP1R12A	BCLXL	0.646571	0.517933	1
3' RET	SMAD4	-0.646541	0.517952	1
5' EML4	PCADHERIN	0.646519	0.517966	1
5' EGFR	EEF2K	0.645944	0.518339	1
5' MAST2	PI3KP110ALPHA	0.645582	0.518573	1
5' TBCD	PKCPANBETAII_pS660	0.645204	0.518818	1
5' NF1	PKCPANBETAII_pS660	0.645041	0.518924	1
5' ANK3	P27_pT157	-0.644983	0.518961	1
5' WNK1	S6	0.644876	0.519031	1
5' NF1	ARID1A	0.644767	0.519128	1
5' ANK3	COLLAGENVI	-0.644648	0.519178	1
5' ANK3	ERCC1	0.644619	0.519197	1
5' EML4	CJUN_pS73	0.644348	0.519373	1
5' PPP1R12A	BID	0.644279	0.519418	1
5' WNK1	TIGAR	-0.643944	0.519635	1
5' WNK1	LKB1	-0.643752	0.51976	1
5' ZDHHC17	X1433BETA	-0.642485	0.520581	1
5' VPS13B	MIG6	0.641601	0.521155	1
5' RAF1	MRE11	-0.641177	0.521431	1
5' ERBB2	CMYC	-0.64094	0.521584	1
5' MAST2	CHK2_pT68	-0.640777	0.52169	1
5' ARID1A	RAB11	0.640048	0.522164	1
5' ERBB2	SRC_pY527	0.639856	0.522289	1
5' PPP1R12A	ERK2	0.639739	0.522365	1
3' RET	PKCALPHA	-0.638987	0.522854	1
5' ERG	X4EBP1	-0.638925	0.522894	1
5' CCDC6	X4EBP1_pT70	0.638813	0.522968	1
5' ARID1A	EIF4E	-0.638695	0.523045	1
5' TBCD	PRAS40_pT246	-0.638322	0.523287	1
5' PPP1R12A	SMAD3	-0.638163	0.523391	1
5' ANK3	SHC_pY317	0.638077	0.523447	1
5' ERG	CAVEOLIN1	0.637105	0.524079	1
5' EGFR	HER3	-0.637032	0.524127	1
5' ANK3	PCNA	-0.636917	0.524202	1
5' VPS13B	AMPK_pT172	-0.636194	0.524673	1
5' EGFR	FOXM1	-0.63469	0.525653	1
5' MED26	CD49B	0.634597	0.525714	1
5' NF1	RBM15	-0.634583	0.525723	1
5' ERBB2	CYCLINE1	-0.634237	0.525949	1
5' EML4	MIG6	-0.633262	0.526585	1
5' PPP1R12A	HER2_pY1248	-0.632687	0.526961	1
5' PPP1R12A	P53	0.631114	0.527989	1
5' EGFR	ASNS	-0.631068	0.528019	1
5' ERG	CHK2_pT68	-0.630648	0.528293	1
5' EML4	RAB11	0.630509	0.528384	1
5' RAF1	RBM15	-0.630416	0.528445	1
5' MED26	PI3KP110ALPHA	0.629275	0.529192	1
5' EPS15L1	ADAR1	-0.629135	0.529318	1
5' VPS13B	PDCD4	0.628667	0.52959	1
5' PPP1R12A	PEA15	0.627901	0.530091	1
5' ERBB2	FOXO3A_pS318S321	-0.627154	0.53058	1
5' WNK1	MSH6	0.626684	0.530889	1
5' RAF1	CD49B	0.625751	0.5315	1
5' PPP1R12A	MTOR	-0.625698	0.531535	1
5' ERG	X1433ZETA	0.625531	0.531645	1
5' NF1	BCL2	0.625176	0.531878	1
5' RAF1	CIAP	-0.624409	0.532382	1
5' ANK3	EEF2	0.623698	0.532848	1
5' CCDC6	SMAD4	-0.622593	0.533575	1
5' MAST2	HER3	0.622453	0.533667	1
5' TBCD	PDK1_pS241	-0.62201	0.533957	1
5' CCDC6	ACETYLATUBULINLYS40	0.621746	0.534131	1
5' VPS13B	EGFR	0.621663	0.534185	1
5' WNK1	RICTOR	-0.621546	0.534263	1
5' ZDHHC17	PI3KP110ALPHA	0.619899	0.535346	1
5' MAST2	P90RSK	0.61988	0.535359	1
5' RAF1	MAPK_pT202Y204	0.619874	0.535363	1
5' MAST2	ETS1	0.619811	0.535405	1
5' MAST2	ALPHACATENIN	-0.619507	0.535639	1
5' EGFR	NF2	0.618284	0.53641	1
5' ERBB2	G6PD	0.617475	0.536944	1
5' PPP1R12A	VHL	-0.617201	0.537124	1
5' MAST2	TUBERIN_pT1462	0.616695	0.537458	1
5' WNK1	PKCDELTA_pS664	0.61662	0.537507	1
5' NF1	PEA15	0.616468	0.537608	1
5' NF1	BAK	0.616329	0.537699	1
5' EGFR	ETS1	-0.615857	0.538011	1
3' RET	EIF4E	0.615768	0.53807	1
5' TBCD	BETACATENIN	0.615124	0.538495	1
5' TBCD	AKT_pS473	-0.615041	0.53855	1
5' ZDHHC17	ALPHACATENIN	-0.614422	0.538992	1
5' EPS15L1	BRAF	0.614199	0.539106	1
5' RAF1	P27_pT157	-0.613697	0.539438	1
5' ANK3	AKT_pS473	0.613136	0.539809	1
5' NF1	ACC1	-0.613032	0.539877	1
5' ANK3	CHK2_pT68	-0.612895	0.539967	1
5' NF1	PDK1	0.612799	0.540031	1
5' MAST2	CASPASE9	-0.613305	0.540046	1
5' ANK3	P53	0.612764	0.540054	1
5' NF1	GAB2	-0.612392	0.5403	1
5' WNK1	MSH2	-0.612033	0.540538	1
3' RET	MIG6	-0.611219	0.541076	1
5' PPP1R12A	ARAF_pS299	-0.610354	0.541649	1
5' ERG	ADAR1	-0.610095	0.541854	1
5' MED26	JAB1	-0.610045	0.541943	1
5' EGFR	EIF4E	-0.609378	0.542295	1
5' ARID1A	INPP4B	-0.609336	0.542323	1
5' ERBB2	FIBRONECTIN	-0.608127	0.543125	1
5' ANK3	LKB1	-0.607916	0.543265	1
5' ZDHHC17	EEF2	0.607026	0.543855	1
5' EGFR	AR	0.606871	0.543958	1
5' ERG	X4EBP1_pT37T46	0.605115	0.545124	1
5' EML4	AMPKALPHA	0.604708	0.545395	1
5' VPS13B	ERALPHA_pS118	-0.603751	0.54603	1
5' VPS13B	BRCA2	-0.603183	0.546412	1
5' EPS15L1	AR	-0.602776	0.546679	1
5' CCDC6	CYCLIND1	-0.602646	0.546766	1
5' ZDHHC17	GAPDH	-0.601466	0.547551	1
5' TBCD	DVL3	0.601342	0.547633	1
3' RET	PRDX1	-0.601279	0.547676	1
5' EML4	RICTOR_pT1135	-0.601102	0.547793	1
5' EML4	P27_pT157	-0.600811	0.547987	1
5' MED26	AMPKALPHA	0.600696	0.548064	1
5' TBCD	GAPDH	-0.600513	0.548186	1
5' VPS13B	IRS1	-0.598563	0.549486	1
5' ARID1A	PEA15	-0.598341	0.549634	1
5' EML4	GSK3ALPHABETA_pS21S9	0.598231	0.549707	1
5' EPS15L1	GAB2	0.596431	0.550908	1
5' ZDHHC17	ERK2	0.596043	0.551168	1
5' WNK1	INPP4B	-0.595641	0.551436	1
5' ERG	ATM	0.595403	0.551595	1
5' NF1	CYCLIND1	-0.595267	0.551686	1
5' ZDHHC17	COLLAGENVI	-0.595215	0.551721	1
5' ARID1A	VHL	-0.594736	0.552041	1
5' MED26	PDK1	0.594659	0.552093	1
5' CCDC6	EEF2K	0.593332	0.55298	1
5' MED26	P27_pT157	-0.592868	0.55329	1
5' NF1	XRCC1	0.592827	0.553318	1
5' ERG	NCADHERIN	0.592549	0.553504	1
5' EPS15L1	MIG6	-0.592216	0.553727	1
5' ZDHHC17	MRE11	-0.5918	0.554006	1
5' MED26	RAB25	-0.59158	0.554153	1
5' WNK1	ACC_pS79	-0.591143	0.554446	1
5' MED26	X4EBP1_pS65	0.590624	0.554793	1
5' ERBB2	CHK2_pT68	-0.590128	0.555125	1
5' MED26	CHK2_pT68	0.589944	0.555249	1
5' ERBB2	MIG6	-0.589862	0.555304	1
5' EPS15L1	MAPK_pT202Y204	0.589797	0.555348	1
5' VPS13B	NOTCH1	-0.588278	0.556367	1
5' MAST2	ARAF_pS299	0.588269	0.556373	1
3' RET	HER3_pY1298	-0.588056	0.556515	1
5' MAST2	SRC_pY416	0.58752	0.556875	1
5' ERBB2	PAXILLIN	0.587345	0.556993	1
5' EGFR	FOXO3A	-0.587203	0.557088	1
5' ANK3	GAPDH	-0.586769	0.55738	1
5' TBCD	LKB1	-0.586598	0.557494	1
5' EPS15L1	GATA3	-0.586343	0.557665	1
5' RAF1	PDCD4	0.585837	0.558005	1
5' ZDHHC17	P38MAPK	0.585307	0.558362	1
5' EML4	JNK_pT183Y185	0.584252	0.559071	1
5' ARID1A	JNK2	0.583915	0.559298	1
5' ERBB2	TFRC	0.583726	0.559425	1
5' WNK1	ADAR1	0.583652	0.559507	1
5' ERG	IGFBP2	-0.582827	0.56003	1
5' VPS13B	S6_pS240S244	-0.582799	0.560049	1
5' WNK1	SMAC	-0.581182	0.561138	1
5' MED26	RICTOR	-0.57955	0.562239	1
5' MED26	CDK1	0.578984	0.56262	1
5' ANK3	PEA15	-0.57836	0.563041	1
5' ANK3	BRAF	0.578258	0.563111	1
5' PPP1R12A	EEF2	-0.57822	0.563136	1
5' VPS13B	GSK3ALPHABETA	-0.578023	0.563269	1
5' ANK3	YB1	0.577983	0.563296	1
5' EPS15L1	PRDX1	-0.576368	0.564386	1
5' ARID1A	ECADHERIN	0.576131	0.564547	1
5' EGFR	NCADHERIN	0.575357	0.56507	1
5' VPS13B	JAB1	-0.575307	0.565187	1
3' RET	X4EBP1_pS65	-0.574747	0.565483	1
5' NF1	BETACATENIN	-0.574169	0.565874	1
5' MAST2	PKCPANBETAII_pS660	0.573936	0.566031	1
5' EGFR	P27_pT157	-0.573703	0.566189	1
5' RAF1	AMPKALPHA	-0.573393	0.566399	1
5' EPS15L1	TTF1	-0.573339	0.566466	1
5' EML4	CHK1	-0.573233	0.566507	1
5' EGFR	FASN	0.573087	0.566606	1
5' ERG	SMAC	0.573008	0.566659	1
5' ERG	NFKBP65_pS536	0.572217	0.567195	1
5' NF1	S6_pS235S236	-0.571925	0.567393	1
5' RAF1	SMAD1	-0.571511	0.567673	1
5' NF1	X4EBP1_pT70	-0.571384	0.56776	1
5' VPS13B	RAPTOR	-0.569641	0.568941	1
5' WNK1	X1433BETA	-0.569382	0.569117	1
5' ARID1A	GSK3ALPHABETA	-0.568935	0.56942	1
5' CCDC6	MRE11	-0.56867	0.5696	1
5' VPS13B	FIBRONECTIN	0.568554	0.569679	1
5' ERBB2	PKCALPHA_pS657	-0.567819	0.570178	1
5' RAF1	GAB2	-0.567514	0.570385	1
5' VPS13B	P21	-0.567452	0.570427	1
5' ARID1A	S6_pS235S236	-0.567449	0.570429	1
5' MED26	FOXM1	0.567129	0.570646	1
5' WNK1	PI3KP110ALPHA	-0.566583	0.571017	1
5' MAST2	BAX	0.566532	0.571052	1
5' RAF1	AR	0.566494	0.571078	1
5' VPS13B	MAPK_pT202Y204	0.565304	0.571887	1
5' EML4	BAX	-0.565235	0.571933	1
5' RAF1	FOXO3A_pS318S321	-0.565056	0.572056	1
5' EML4	SRC	-0.564905	0.572158	1
5' TBCD	VEGFR2	0.564855	0.572192	1
5' MED26	S6_pS235S236	-0.564138	0.57268	1
5' RAF1	VEGFR2	0.56387	0.572862	1
5' PPP1R12A	SMAD1	-0.562853	0.573555	1
5' NF1	ANNEXIN1	0.56267	0.573679	1
5' MED26	P90RSK_pT359S363	-0.562616	0.573716	1
5' VPS13B	BAP1C4	0.562575	0.573744	1
5' ARID1A	ERALPHA_pS118	-0.561743	0.574311	1
5' MED26	STATHMIN	0.561546	0.574445	1
5' EML4	CMYC	-0.561087	0.574758	1
5' ERBB2	AKT	0.561076	0.574766	1
5' NF1	EGFR_pY1068	-0.560552	0.575123	1
5' WNK1	P27_pT157	-0.559404	0.575906	1
5' ZDHHC17	AMPKALPHA	-0.559126	0.576095	1
5' ANK3	NOTCH1	-0.55906	0.576141	1
5' ANK3	RAPTOR	0.558761	0.576344	1
5' RAF1	BCLXL	-0.558667	0.576409	1
5' PPP1R12A	P90RSK	-0.558616	0.576443	1
5' EGFR	PKCALPHA	0.558586	0.576464	1
5' VPS13B	LKB1	-0.558563	0.576479	1
5' ZDHHC17	HER2	0.558557	0.576484	1
5' ARID1A	BAX	0.558409	0.576585	1
5' PPP1R12A	NDRG1_pT346	-0.558292	0.576665	1
5' MED26	ERK2	0.55787	0.576953	1
5' ANK3	IRS1	-0.557593	0.577142	1
5' ERBB2	ARID1A	-0.557503	0.577226	1
5' NF1	PKCDELTA_pS664	-0.557469	0.577227	1
5' ARID1A	CRAF	-0.557052	0.577512	1
5' WNK1	LCK	0.556938	0.577589	1
5' NF1	X4EBP1_pS65	-0.555078	0.57886	1
5' EML4	BAK	0.555	0.578914	1
5' ERG	GATA3	0.554674	0.579137	1
5' ERBB2	AMPK_pT172	0.553609	0.579866	1
5' ZDHHC17	S6	0.553335	0.580053	1
5' ZDHHC17	SHC_pY317	-0.552976	0.580299	1
5' WNK1	BCL2	-0.552381	0.580706	1
5' TBCD	FOXM1	0.552275	0.58078	1
5' MAST2	MSH2	0.552104	0.580896	1
5' VPS13B	DVL3	-0.551876	0.581053	1
5' VPS13B	MTOR	-0.55181	0.581098	1
5' ZDHHC17	STATHMIN	-0.551689	0.58118	1
5' EML4	PREX1	0.551325	0.58143	1
5' CCDC6	ERALPHA_pS118	0.551158	0.581544	1
5' EML4	EIF4G	0.551003	0.581651	1
5' ZDHHC17	CRAF_pS338	-0.550972	0.581672	1
5' EGFR	SRC	-0.550209	0.582195	1
5' ARID1A	BCLXL	0.549998	0.58234	1
5' ERG	HER3	-0.549897	0.582409	1
5' EML4	BETACATENIN	0.549757	0.582505	1
5' EGFR	KU80	0.549524	0.582665	1
5' TBCD	CYCLINE2	-0.549118	0.582943	1
5' EML4	FASN	-0.548542	0.583339	1
5' EML4	ETS1	0.547788	0.583857	1
5' VPS13B	HER3	-0.547611	0.583978	1
5' EPS15L1	EIF4E	-0.547331	0.584171	1
5' ANK3	PRDX1	-0.545993	0.58509	1
5' WNK1	CJUN_pS73	-0.545781	0.585236	1
5' ERBB2	COLLAGENVI	0.545312	0.585558	1
5' EML4	RICTOR	0.544727	0.58596	1
5' NF1	HEREGULIN	0.544108	0.586386	1
5' ZDHHC17	X4EBP1_pT37T46	0.543981	0.586474	1
5' ANK3	HER2	-0.543962	0.586487	1
5' RAF1	X4EBP1_pT37T46	0.543816	0.586587	1
5' EGFR	MSH6	0.543481	0.586818	1
5' VPS13B	SMAD4	-0.542998	0.58715	1
5' EGFR	BRAF	-0.542697	0.587357	1
5' ANK3	YAP	-0.542115	0.587758	1
5' MAST2	NDRG1_pT346	0.541924	0.58789	1
[truncated: 1,565 more rows]
