# Supplementary material for: Genetic fusions favor tumorigenesis through degron loss in oncogenes
Source: Nat Commun. 2021 Nov 18;12:6704. doi: 10.1038/s41467-021-26871-y (PMC8602260; doi:10.1038/s41467-021-26871-y)
Supplement: Supplementary file 7 — Dataset 5 [file 41467_2021_26871_MOESM7_ESM.xlsx]

## Sheet: Table_S6
gene	tf	cancer_type	chipseq	t-value	p-value	TF association
5' ERG	AR	PRAD	367.AR@56122	14.4338	6.45936e-47	significant
5' EGFR	STAT1	GBM	6772.STAT1@45955	10.0466	1.11894e-23	significant
5' EML4	TTF1	LUAD	7270.TTF1@47578	8.54585	1.38929e-17	significant
5' ERBB2	GRHL2	BLCA	79977.GRHL2@35315	8.40143	4.77496e-17	significant
3' ABL1	TAL1	LAML	6886.TAL1@44435	8.16017	3.64022e-16	significant
5' TBCD	NR3C1	BRCA	2908.NR3C1@57915	-8.1299	4.60633e-16	significant
5' CPS1	TAL1	LIHC	6886.TAL1@44433	7.95339	1.9348e-15	significant
5' NF1	JUN	SARC	3725.JUN@47288	-7.85857	4.12966e-15	significant
5' NF1	MYC	SARC	4609.MYC@45928	7.84744	4.51157e-15	significant
5' ERBB2	BRD4	BRCA	23476.BRD4@49977	7.72717	1.16418e-14	significant
3' NSD1	FLI1	BRCA	2313.FLI1@5443	7.44746	9.99692e-14	significant
5' EML4	HSF1	LUAD	3297.HSF1@51863	-7.32516	2.4994e-13	significant
5' ERBB2	KDM5B	BRCA	10765.KDM5B@47285	7.30294	2.94703e-13	significant
5' CPS1	YY1	LIHC	7528.YY1@63430	-7.26286	3.9637e-13	significant
5' CPS1	FOXP1	LIHC	27086.FOXP1@51750	-7.17632	7.47429e-13	significant
5' NF1	ESR1	SARC	2099.ESR1@36104	-7.09059	1.39085e-12	significant
5' ERBB2	EHF	BRCA	26298.EHF@50820	6.97948	3.0783e-12	significant
5' ARID1A	ESR1	BRCA	2099.ESR1@33506	6.88443	6.01553e-12	significant
5' ERBB2	IRF2	BLCA	3660.IRF2@33542	-6.78113	1.23392e-11	significant
5' VPS13B	HSF1	BRCA	3297.HSF1@51863	-6.70921	2.0219e-11	significant
5' VPS13B	ING2	BRCA	3622.ING2@41572	6.69342	2.252e-11	significant
5' EML4	FLI1	LUAD	2313.FLI1@5439	-6.68757	2.34399e-11	significant
3' RET	ESRRA	THCA	2101.ESRRA@45627	-6.59959	4.25201e-11	significant
5' CCDC6	ESRRA	THCA	2101.ESRRA@45627	-6.59763	4.30827e-11	significant
5' NF1	FOXO1	SARC	2308.FOXO1@54243	-6.52302	7.09585e-11	significant
5' VPS13B	JARID2	BRCA	3720.JARID2@41793	6.51115	7.67812e-11	significant
5' EML4	STAT3	LUAD	6774.STAT3@34236	6.46214	1.06206e-10	significant
5' ZDHHC17	CBFB	SARC	865.CBFB@37604	-6.33477	2.44004e-10	significant
5' CPS1	RXRA	LIHC	6256.RXRA@46242	-6.24861	4.24566e-10	significant
5' ERBB2	BACH1	BLCA	571.BACH1@64378	-6.12987	9.00004e-10	significant
5' ERBB2	THAP11	BLCA	57215.THAP11@51613	6.09218	1.13917e-09	significant
5' NCOA4	ETV1	THCA	2115.ETV1@534	6.00616	1.94051e-09	significant
3' RET	RUNX1	THCA	861.RUNX1@8481	5.97022	2.41917e-09	significant
5' EGFR	BRD4	GBM	23476.BRD4@39025	-5.93017	3.08882e-09	significant
3' NSD1	SMAD4	BRCA	4089.SMAD4@51574	5.88836	3.97792e-09	significant
5' ERBB2	TP53	BLCA	7157.TP53@52092	5.82994	5.6509e-09	significant
5' EGFR	STAG1	GBM	10274.STAG1@1493	5.82939	5.67069e-09	significant
3' ABL1	GATA1	LAML	2623.GATA1@3274	5.80003	6.77896e-09	significant
5' NF1	NR2F2	SARC	7026.NR2F2@62909	-5.78115	7.55662e-09	significant
3' RET	TTF1	THCA	7270.TTF1@47578	5.77521	7.82781e-09	significant
3' NSD1	PPARG	BRCA	5468.PPARG@50409	5.75373	8.88827e-09	significant
3' NSD1	CBX5	BRCA	23468.CBX5@63410	5.72684	1.04146e-08	significant
5' TBCD	GATA3	BRCA	2625.GATA3@46361	5.71665	1.10571e-08	significant
5' NF1	DAXX	SARC	1616.DAXX@54105	5.68611	1.32221e-08	significant
5' NCOA4	EP300	THCA	2033.EP300@46363	5.67497	1.41099e-08	significant
5' ARID1A	HSF1	BRCA	3297.HSF1@51864	5.66451	1.49958e-08	significant
5' ERG	BRD4	PRAD	23476.BRD4@44585	5.6571	1.56709e-08	significant
3' ABL1	ETS1	LAML	2113.ETS1@37945	5.64898	1.64664e-08	significant
5' ERG	ETV1	PRAD	2115.ETV1@39372	5.64245	1.70624e-08	significant
5' EGFR	HSF1	LGG	3297.HSF1@51864	5.62495	1.88643e-08	significant
5' NCOA4	TTF1	THCA	7270.TTF1@47578	5.59912	2.18963e-08	significant
5' NF1	BRD1	SARC	23774.BRD1@41574	5.57417	2.52708e-08	significant
5' EGFR	BRD1	LGG	23774.BRD1@41574	5.55972	2.74499e-08	significant
5' ANK3	TP53	BRCA	7157.TP53@44394	-5.52199	3.4036e-08	significant
5' CCDC6	ZFX	THCA	7543.ZFX@64866	-5.50836	3.67746e-08	significant
5' ERBB2	SUPT5H	BLCA	6829.SUPT5H@53325	5.49619	3.93975e-08	significant
3' RET	ETV1	THCA	2115.ETV1@534	5.46907	4.59161e-08	significant
5' NCOA4	TP63	THCA	8626.TP63@44759	5.45885	4.86309e-08	significant
3' ABL1	KMT2A	LAML	4297.KMT2A@59165	5.45016	5.12092e-08	significant
5' EGFR	BRD3	LGG	8019.BRD3@35874	5.43539	5.54713e-08	significant
5' CCDC6	STAT5B	THCA	6777.STAT5B@53630	5.42162	5.9914e-08	significant
5' NF1	USF2	SARC	7392.USF2@63382	-5.41896	6.08072e-08	significant
5' RAF1	GABPA	THCA	2551.GABPA@47411	5.39107	7.10273e-08	significant
5' VPS13B	RBBP5	BRCA	5929.RBBP5@45232	5.38672	7.27612e-08	significant
5' CPS1	BACH1	LIHC	571.BACH1@64378	5.3687	8.04061e-08	significant
5' EGFR	SMARCA4	LGG	6597.SMARCA4@34389	5.35208	8.8136e-08	significant
5' ERBB2	ETV5	BRCA	2119.ETV5@42714	5.34685	9.07186e-08	significant
3' RET	STAT5B	THCA	6777.STAT5B@53635	5.34136	9.35096e-08	significant
5' ERBB2	DNMT3B	BRCA	1789.DNMT3B@62874	-5.33488	9.68998e-08	significant
5' CPS1	CASP8AP2	LIHC	9994.CASP8AP2@38860	5.32978	9.96573e-08	significant
3' RET	ZFX	THCA	7543.ZFX@64866	-5.31673	1.07061e-07	significant
5' VPS13B	DNMT3B	BRCA	1789.DNMT3B@62874	5.3166	1.07135e-07	significant
3' RET	MITF	THCA	4286.MITF@52548	-5.3136	1.08912e-07	significant
5' EGFR	PML	GBM	5371.PML@46307	-5.31222	1.09754e-07	significant
5' ZDHHC17	KDM5B	SARC	10765.KDM5B@47273	-5.28191	1.29508e-07	significant
5' EML4	TP63	LUAD	8626.TP63@52299	5.27535	1.34222e-07	significant
5' EGFR	ZFX	LGG	7543.ZFX@50077	5.26623	1.41043e-07	significant
5' VPS13B	CBFB	BRCA	865.CBFB@37604	-5.24856	1.5524e-07	significant
3' RET	TP63	THCA	8626.TP63@44759	5.22971	1.71909e-07	significant
5' VPS13B	NR3C1	BRCA	2908.NR3C1@57915	-5.22195	1.79251e-07	significant
3' NSD1	CTBP1	BRCA	1487.CTBP1@36085	5.22055	1.80607e-07	significant
5' ERBB2	ZNF384	BRCA	171017.ZNF384@65106	-5.22053	1.8063e-07	significant
3' RET	SUPT5H	THCA	6829.SUPT5H@58338	-5.21201	1.89113e-07	significant
5' EGFR	MAX	GBM	4149.MAX@33177	5.19576	2.06399e-07	significant
5' NF1	MXI1	SARC	4601.MXI1@45774	5.19447	2.078e-07	significant
5' ZDHHC17	ZNF264	SARC	9422.ZNF264@63774	-5.19308	2.09365e-07	significant
5' RAF1	KDM4C	THCA	23081.KDM4C@43684	5.17969	2.24933e-07	significant
5' RAF1	HDAC1	THCA	3065.HDAC1@57641	5.17927	2.25448e-07	significant
5' ERBB2	CHRM2	BRCA	1129.CHRM2@43234	5.17429	2.31529e-07	significant
5' ARID1A	HOXB13	BRCA	10481.HOXB13@56668	-5.15548	2.55968e-07	significant
5' NCOA4	RUNX1	THCA	861.RUNX1@55172	5.15282	2.59633e-07	significant
5' ERG	FOXA1	PRAD	3169.FOXA1@50039	5.14242	2.74572e-07	significant
5' ERG	ESRRA	PRAD	2101.ESRRA@45627	-5.10052	3.42771e-07	significant
5' EML4	INTS3	LUAD	65123.INTS3@53323	-5.08192	3.77826e-07	significant
5' NCOA4	FOXA1	THCA	3169.FOXA1@50039	-5.07721	3.87291e-07	significant
5' ERG	KDM5A	PRAD	5927.KDM5A@45244	-5.07274	3.96727e-07	significant
5' EGFR	SMAD4	LGG	4089.SMAD4@51574	5.06939	4.03508e-07	significant
5' ERG	GABPA	PRAD	2551.GABPA@47412	5.05636	4.32274e-07	significant
3' ABL1	ZNF197	LAML	10168.ZNF197@63956	-5.05039	4.46662e-07	significant
5' NCOA4	CEBPB	THCA	1051.CEBPB@34564	5.0397	4.71322e-07	significant
5' ERBB2	TFAP2C	BRCA	7022.TFAP2C@9509	5.03877	4.73597e-07	significant
5' CCDC6	HINFP	THCA	25988.HINFP@64045	5.0366	4.79009e-07	significant
5' TBCD	MYH11	BRCA	4629.MYH11@37625	5.03126	4.92514e-07	significant
5' TBCD	TP53	BRCA	7157.TP53@44394	-5.02293	5.14341e-07	significant
5' VPS13B	GRHL2	BRCA	79977.GRHL2@35315	-4.9986	5.83537e-07	significant
5' ERBB2	ZFP42	BLCA	132625.ZFP42@51548	4.96675	6.87811e-07	significant
5' CCDC6	MITF	THCA	4286.MITF@52548	-4.95962	7.13509e-07	significant
5' ANK3	DMC1	BRCA	11144.DMC1@50422	-4.95728	7.2211e-07	significant
5' ERBB2	KMT2A	BLCA	4297.KMT2A@59165	4.94748	7.59397e-07	significant
5' EGFR	CHD8	GBM	57680.CHD8@49778	4.94678	7.62202e-07	significant
3' ABL1	HSF1	LAML	3297.HSF1@51864	-4.94687	7.63243e-07	significant
5' ZDHHC17	BRD4	SARC	23476.BRD4@32812	4.93518	8.08756e-07	significant
5' ERBB2	E2F8	BRCA	79733.E2F8@38804	4.9285	8.36866e-07	significant
5' CPS1	ATF1	LIHC	466.ATF1@56053	4.90372	9.49584e-07
5' ERBB2	MAZ	BRCA	4150.MAZ@45867	-4.89911	9.72065e-07
5' EGFR	BACH1	LGG	571.BACH1@64377	4.89214	1.00708e-06
3' RET	ZNF467	THCA	168544.ZNF467@65062	4.89015	1.01732e-06
5' TBCD	NFATC1	BRCA	4772.NFATC1@38742	4.84679	1.26641e-06
5' CCDC6	YY1	THCA	7528.YY1@46104	-4.84297	1.29105e-06
5' EGFR	ARNT	GBM	405.ARNT@5517	-4.81431	1.49068e-06
5' ERBB2	POU2F2	BLCA	5452.POU2F2@46115	-4.80132	1.59038e-06
3' NSD1	SUPT5H	BRCA	6829.SUPT5H@64772	4.79852	1.61275e-06
5' ERBB2	CDK7	BRCA	1022.CDK7@40055	4.75204	2.03118e-06
5' RAF1	NELFA	THCA	7469.NELFA@55465	-4.75002	2.05147e-06
3' NSD1	YY1	BRCA	7528.YY1@46342	4.74284	2.12548e-06
5' CCDC6	FOXA1	THCA	3169.FOXA1@46368	-4.7284	2.2821e-06
5' EML4	FOXO1	LUAD	2308.FOXO1@54243	-4.72177	2.3578e-06
5' ERBB2	GATA1	BLCA	2623.GATA1@8458	-4.71992	2.37919e-06
5' CPS1	GATA6	LIHC	2627.GATA6@47595	-4.69495	2.68874e-06
5' ZDHHC17	HINFP	SARC	25988.HINFP@64045	4.6937	2.70511e-06
3' NSD1	TCF7L2	BRCA	6934.TCF7L2@36841	4.69258	2.72005e-06
3' ABL1	SPI1	LAML	6688.SPI1@46259	-4.68591	2.81448e-06
5' EGFR	KDM4A	LGG	9682.KDM4A@45228	-4.68481	2.82505e-06
5' TBCD	C11orf30	BRCA	56946.C11orf30@63362	-4.66997	3.03673e-06
5' NF1	MED1	SARC	5469.MED1@56555	4.66992	3.03755e-06
5' CCDC6	ATF1	THCA	466.ATF1@56054	4.6621	3.15511e-06
3' ABL1	EGR2	LAML	1959.EGR2@64860	4.66078	3.18025e-06
5' ANK3	CHD1	BRCA	1105.CHD1@36348	4.65855	3.20986e-06
3' NSD1	FOXK2	BRCA	3607.FOXK2@63744	-4.65692	3.23544e-06
3' RET	DLX1	THCA	1745.DLX1@38719	-4.65566	3.25531e-06
5' NF1	ZFP42	SARC	132625.ZFP42@51548	4.64329	3.4562e-06
5' EML4	SMAD5	LUAD	4090.SMAD5@63097	4.63712	3.56091e-06
5' ERBB2	MYC	BRCA	4609.MYC@46001	4.63269	3.63763e-06
5' NF1	CHD5	SARC	26038.CHD5@40348	4.62977	3.68924e-06
5' ARID1A	GATA1	BRCA	2623.GATA1@8458	4.62908	3.70151e-06
3' RET	MYBL2	THCA	4605.MYBL2@46241	4.61857	3.89385e-06
5' ERBB2	HINFP	BLCA	25988.HINFP@64045	-4.60499	4.15635e-06
5' EGFR	SP3	LGG	6670.SP3@62841	-4.5908	4.44873e-06
5' EGFR	RAD51	GBM	5888.RAD51@62652	-4.58066	4.67013e-06
5' ERBB2	PRDM1	BRCA	639.PRDM1@45747	4.57865	4.71493e-06
5' NF1	KAT8	SARC	84148.KAT8@4403	4.57766	4.73728e-06
5' ARID1A	NPAT	BRCA	4863.NPAT@38645	4.57492	4.79944e-06
5' RAF1	MAF	THCA	4094.MAF@58809	-4.56839	4.95135e-06
5' CPS1	HEY1	LIHC	23462.HEY1@7341	-4.56623	5.00271e-06
5' EML4	ZNF384	LUAD	171017.ZNF384@65106	-4.55577	5.25796e-06
5' ARID1A	MRE11A	BRCA	4361.MRE11A@51839	-4.54312	5.58304e-06
5' NF1	MAX	SARC	4149.MAX@46180	4.53226	5.8777e-06
5' ZDHHC17	STAG1	SARC	10274.STAG1@1493	4.52335	6.1303e-06
5' EGFR	RFX5	LGG	5993.RFX5@45730	-4.51758	6.29952e-06
5' TBCD	FLI1	BRCA	2313.FLI1@5443	4.49996	6.84434e-06
5' ERBB2	SMAD4	BLCA	4089.SMAD4@51574	4.49904	6.87374e-06
5' ANK3	C11orf30	BRCA	56946.C11orf30@63363	-4.48007	7.51318e-06
5' EML4	FOXP2	LUAD	93986.FOXP2@46340	-4.47553	7.67447e-06
3' ABL1	RUNX1	LAML	861.RUNX1@58139	-4.47347	7.75917e-06
3' RET	CEBPB	THCA	1051.CEBPB@34564	4.47108	7.83599e-06
5' ARID1A	TFAP2A	BRCA	7020.TFAP2A@2401	-4.47034	7.86284e-06
5' ERBB2	FOXM1	BLCA	2305.FOXM1@34997	4.45869	8.30209e-06
5' ERBB2	ERCC6	BRCA	2074.ERCC6@49036	-4.4455	8.82757e-06
5' NCOA4	E2F1	THCA	1869.E2F1@53013	-4.445	8.8478e-06
5' ERBB2	EHMT2	BRCA	10919.EHMT2@56463	4.43123	9.43172e-06
5' EGFR	EZH2	GBM	2146.EZH2@45498	4.42665	9.63423e-06
5' ANK3	SIN3A	BRCA	25942.SIN3A@46327	4.42526	9.69562e-06
5' ANK3	CBFB	BRCA	865.CBFB@37604	4.41951	9.95719e-06
5' ARID1A	SP1	BRCA	6667.SP1@65151	-4.41542	1.0147e-05
5' EGFR	KLF9	LGG	687.KLF9@49949	4.41475	1.01785e-05
5' ERBB2	FOXP1	BRCA	27086.FOXP1@51750	4.3977	1.10106e-05
5' RAF1	ESRRA	THCA	2101.ESRRA@45796	-4.39468	1.11648e-05
5' CCDC6	DLX1	THCA	1745.DLX1@38719	-4.39309	1.12463e-05
5' EML4	RING1	LUAD	6015.RING1@41489	-4.39065	1.13735e-05
5' NF1	CTBP1	SARC	1487.CTBP1@36085	4.39038	1.13876e-05
5' ANK3	AR	BRCA	367.AR@47333	-4.38911	1.14536e-05
5' ANK3	NR3C1	BRCA	2908.NR3C1@57915	-4.38712	1.15588e-05
5' VPS13B	H2AZ	BRCA	3015.H2AZ@37980	4.38315	1.17714e-05
5' ERG	DDX21	PRAD	9188.DDX21@50210	-4.3644	1.28308e-05
5' ERBB2	ZNF346	BRCA	23567.ZNF346@62900	-4.36416	1.28404e-05
5' TBCD	EED	BRCA	8726.EED@41187	-4.36184	1.29774e-05
3' RET	BRD4	THCA	23476.BRD4@39002	-4.36043	1.30616e-05
5' NCOA4	MXI1	THCA	4601.MXI1@46038	-4.35939	1.31232e-05
5' EML4	ZNF264	LUAD	9422.ZNF264@63774	-4.35793	1.32112e-05
5' NCOA4	JARID2	THCA	3720.JARID2@41797	4.35633	1.33076e-05
5' EGFR	SRC	LGG	6714.SRC@6710	4.35081	1.36471e-05
5' ERG	HSF1	PRAD	3297.HSF1@51864	-4.3217	1.55813e-05
5' ANK3	ILK	BRCA	3611.ILK@64129	4.3184	1.58104e-05
3' ABL1	RBBP5	LAML	5929.RBBP5@8820	4.31848	1.58231e-05
5' EGFR	EHMT2	LGG	10919.EHMT2@56462	-4.30448	1.68363e-05
5' ARID1A	KDM2B	BRCA	84678.KDM2B@58081	-4.30318	1.69355e-05
3' ABL1	DPF2	LAML	5977.DPF2@63061	-4.30214	1.70347e-05
3' NSD1	CREBBP	BRCA	1387.CREBBP@42638	-4.30079	1.71191e-05
3' ABL1	PRAME	LAML	23532.PRAME@2110	4.29885	1.72895e-05
5' RAF1	CDX2	THCA	1045.CDX2@5461	4.27917	1.88679e-05
5' CCDC6	MAF	THCA	4094.MAF@58809	4.27533	1.91953e-05
5' CCDC6	HES2	THCA	54626.HES2@64242	-4.26986	1.96718e-05
5' EML4	SRF	LUAD	6722.SRF@51596	4.26603	2.00118e-05
5' ARID1A	SPI1	BRCA	6688.SPI1@34565	4.26414	2.01815e-05
3' NSD1	IRF2	BRCA	3660.IRF2@33542	-4.25969	2.05868e-05
3' RET	ATF1	THCA	466.ATF1@56054	4.25892	2.06582e-05
5' TBCD	KDM4C	BRCA	23081.KDM4C@43684	4.24672	2.1814e-05
3' ABL1	BHLHE40	LAML	8553.BHLHE40@45632	4.24674	2.18361e-05
5' EML4	ESR1	LUAD	2099.ESR1@36104	4.24601	2.18832e-05
5' TBCD	RFX5	BRCA	5993.RFX5@45730	-4.24544	2.19384e-05
3' ABL1	EZH2	LAML	2146.EZH2@45370	-4.22339	2.42235e-05
5' CPS1	ZKSCAN1	LIHC	7586.ZKSCAN1@45786	4.217	2.48927e-05
5' CPS1	CHD8	LIHC	57680.CHD8@49778	4.21391	2.52355e-05
3' ABL1	CEBPB	LAML	1051.CEBPB@34564	-4.21271	2.53966e-05
5' ANK3	TCF7L2	BRCA	6934.TCF7L2@36841	4.20853	2.58422e-05
5' ERG	NKX3-1	PRAD	4824.NKX3-1@36252	-4.20606	2.6134e-05
5' NF1	RARA	SARC	5914.RARA@53300	4.20393	2.6373e-05
3' NSD1	NELFA	BRCA	7469.NELFA@55468	-4.19324	2.76472e-05
5' ERG	HCFC1	PRAD	3054.HCFC1@45890	-4.18994	2.80596e-05
5' EGFR	SP1	GBM	6667.SP1@46190	-4.17891	2.94472e-05
5' EML4	BACH1	LUAD	571.BACH1@64378	-4.17626	2.97906e-05
5' EGFR	FOXP2	GBM	93986.FOXP2@46333	-4.17594	2.98333e-05
5' EGFR	FOXM1	LGG	2305.FOXM1@46350	4.17419	3.00615e-05
5' CPS1	MYC	LIHC	4609.MYC@45827	-4.17056	3.05443e-05
3' NSD1	BCAT1	BRCA	586.BCAT1@5454	-4.15938	3.20759e-05
3' RET	KMT2A	THCA	4297.KMT2A@59165	4.15597	3.25592e-05
5' ARID1A	ERCC6	BRCA	2074.ERCC6@49036	4.15396	3.28451e-05
3' ABL1	NFYA	LAML	4800.NFYA@42738	-4.14817	3.37194e-05
5' EML4	TCF21	LUAD	6943.TCF21@52495	-4.13752	3.52866e-05
5' RAF1	ZMYM3	THCA	9203.ZMYM3@62709	-4.1263	3.70507e-05
5' EGFR	YY1	GBM	7528.YY1@7060	4.12056	3.79867e-05
5' ERBB2	EZH2	BLCA	2146.EZH2@45490	-4.12044	3.80036e-05
3' NSD1	ARRB1	BRCA	408.ARRB1@50152	4.1098	3.97957e-05
5' ANK3	ZBTB7B	BRCA	51043.ZBTB7B@38666	-4.10201	4.11583e-05
5' NF1	ARNT	SARC	405.ARNT@5517	4.09509	4.24073e-05
5' EML4	ARRB1	LUAD	408.ARRB1@50162	4.09465	4.24885e-05
5' EML4	CBFB	LUAD	865.CBFB@37621	4.0941	4.25893e-05
5' RAF1	IRF2	THCA	3660.IRF2@33542	-4.09238	4.2905e-05
5' TBCD	NKX3-1	BRCA	4824.NKX3-1@36252	4.09124	4.31155e-05
5' VPS13B	KDM5B	BRCA	10765.KDM5B@47266	-4.08522	4.42482e-05
5' EGFR	FOXP2	LGG	93986.FOXP2@46340	4.07705	4.58286e-05
5' VPS13B	KMT2A	BRCA	4297.KMT2A@59165	4.07695	4.58485e-05
5' EGFR	PRDM1	LGG	639.PRDM1@65133	4.07334	4.65652e-05
5' TBCD	KMT2A	BRCA	4297.KMT2A@59165	4.06923	4.7394e-05
5' VPS13B	CHD1	BRCA	1105.CHD1@36348	4.06381	4.85068e-05
3' ABL1	DDX5	LAML	1655.DDX5@49196	-4.06264	4.87947e-05
5' ERBB2	E2F4	BRCA	1874.E2F4@542	4.06009	4.92854e-05
5' VPS13B	KAT5	BRCA	10524.KAT5@4631	-4.05977	4.93526e-05
5' ARID1A	BCL6	BRCA	604.BCL6@1958	4.05612	5.01285e-05
5' RAF1	CREBBP	THCA	1387.CREBBP@2748	-4.05511	5.03464e-05
3' ABL1	ELF1	LAML	1997.ELF1@65014	-4.0506	5.13733e-05
5' EML4	SNAI2	LUAD	6591.SNAI2@48331	4.05017	5.14218e-05
5' RAF1	PRDM1	THCA	639.PRDM1@62702	4.04867	5.17501e-05
5' ERBB2	KMT2A	BRCA	4297.KMT2A@59165	-4.04815	5.18649e-05
5' ANK3	HNF1A	BRCA	6927.HNF1A@64546	-4.047	5.21195e-05
5' ARID1A	FOXO1	BRCA	2308.FOXO1@54243	-4.04672	5.21812e-05
5' ERBB2	BRCA1	BLCA	672.BRCA1@45736	-4.0419	5.32667e-05
5' VPS13B	KLF5	BRCA	688.KLF5@38831	4.04101	5.34683e-05
5' TBCD	LMNB1	BRCA	4001.LMNB1@50122	4.03998	5.37046e-05
5' TBCD	JARID2	BRCA	3720.JARID2@41793	4.03565	5.47041e-05
5' EGFR	KDM4A	GBM	9682.KDM4A@45228	-4.03492	5.48751e-05
5' TBCD	FOXO1	BRCA	2308.FOXO1@54243	4.03143	5.56937e-05
5' CCDC6	RELA	THCA	5970.RELA@4975	4.0284	5.64153e-05
5' ERBB2	SUZ12	BLCA	23512.SUZ12@38163	4.02712	5.67233e-05
5' EML4	FOXM1	LUAD	2305.FOXM1@46311	-4.02591	5.70164e-05
3' ABL1	ZNF12	LAML	7559.ZNF12@42882	-4.02163	5.81122e-05
5' ARID1A	ZBTB26	BRCA	57684.ZBTB26@65120	-4.01543	5.96064e-05
5' EGFR	RFX2	LGG	5990.RFX2@38761	4.0114	6.06311e-05
5' ERBB2	FOXA2	BRCA	3170.FOXA2@52684	-4.01059	6.08393e-05
5' CCDC6	CEBPB	THCA	1051.CEBPB@34564	4.00469	6.23774e-05
5' ERBB2	HNF4G	BLCA	3174.HNF4G@46239	-3.99886	6.39323e-05
5' ARID1A	BRD3	BRCA	8019.BRD3@35874	3.99669	6.45184e-05
5' NCOA4	MLLT1	THCA	4298.MLLT1@63875	3.99425	6.51864e-05
5' ANK3	MED12	BRCA	9968.MED12@38653	-3.9886	6.67573e-05
5' ERG	CREB1	PRAD	1385.CREB1@46231	3.9874	6.71123e-05
5' TBCD	IRF2	BRCA	3660.IRF2@33542	-3.98658	6.73292e-05
5' VPS13B	CREBBP	BRCA	1387.CREBBP@2748	-3.98242	6.85174e-05
5' CCDC6	TTF1	THCA	7270.TTF1@47579	3.97164	7.1691e-05
5' NF1	FOXK2	SARC	3607.FOXK2@62913	-3.96993	7.2206e-05
5' ERBB2	SCRT1	BRCA	83482.SCRT1@64012	3.96949	7.23386e-05
5' RAF1	HNF1A	THCA	6927.HNF1A@64546	3.96777	7.28626e-05
5' EGFR	MYC	GBM	4609.MYC@33180	3.96603	7.33991e-05
5' RAF1	HNF4G	THCA	3174.HNF4G@63225	3.96558	7.35348e-05
5' CPS1	STAT4	LIHC	6775.STAT4@37177	3.96458	7.38437e-05
5' CCDC6	MYBL2	THCA	4605.MYBL2@46241	3.96386	7.40657e-05
5' ERBB2	ZNF146	BRCA	7705.ZNF146@64240	-3.95775	7.59839e-05
5' EML4	GATA4	LUAD	2626.GATA4@38741	-3.95396	7.71975e-05
3' NSD1	NPAT	BRCA	4863.NPAT@38645	3.94731	7.93696e-05
3' RET	EP300	THCA	2033.EP300@46363	3.94697	7.94825e-05
5' CCDC6	RUNX1	THCA	861.RUNX1@55172	3.94557	7.9947e-05
3' RET	L3MBTL2	THCA	83746.L3MBTL2@63813	-3.94309	8.07782e-05
5' EML4	H2AZ	LUAD	3015.H2AZ@45221	3.94238	8.10198e-05
5' NF1	FOXM1	SARC	2305.FOXM1@34999	3.93915	8.21152e-05
5' ZDHHC17	ERCC3	SARC	2071.ERCC3@41411	-3.93301	8.42409e-05
3' RET	YY1	THCA	7528.YY1@46104	-3.93299	8.42466e-05
5' VPS13B	DDX21	BRCA	9188.DDX21@50210	3.92955	8.54605e-05
5' VPS13B	GATAD1	BRCA	57798.GATAD1@1219	-3.9274	8.62262e-05
5' CCDC6	TP63	THCA	8626.TP63@44759	3.92593	8.67556e-05
5' EGFR	AFF1	GBM	4299.AFF1@34966	3.92505	8.70754e-05
5' ZDHHC17	MYBL2	SARC	4605.MYBL2@46241	3.92008	8.88863e-05
3' NSD1	CHD8	BRCA	57680.CHD8@51103	3.91916	8.9225e-05
5' CPS1	JMJD1C	LIHC	221037.JMJD1C@59001	-3.91854	8.9457e-05
5' ANK3	CDK9	BRCA	1025.CDK9@53346	-3.91729	8.99178e-05
3' ABL1	KDM2B	LAML	84678.KDM2B@58081	3.91473	9.09504e-05
5' EML4	BRD4	LUAD	23476.BRD4@40032	-3.90876	9.31533e-05
5' NCOA4	CTCF	THCA	10664.CTCF@8090	3.90592	9.42521e-05
5' ZDHHC17	STAT5B	SARC	6777.STAT5B@53628	3.90365	9.51381e-05
5' ERG	ZNF687	PRAD	57592.ZNF687@64786	-3.9022	9.57307e-05
5' CCDC6	SMC1A	THCA	8243.SMC1A@56557	3.89826	9.72785e-05
3' RET	EZH2	THCA	2146.EZH2@41794	3.89229	9.97039e-05
5' VPS13B	MBD3	BRCA	53615.MBD3@59412	-3.88853	0.000101259
3' NSD1	KMT2A	BRCA	4297.KMT2A@59165	3.88778	0.000101573
5' EML4	ZNF697	LUAD	90874.ZNF697@63011	-3.88332	0.000103453
5' CPS1	HSF1	LIHC	3297.HSF1@51863	-3.88263	0.000103747
5' ERBB2	ZBTB40	BRCA	9923.ZBTB40@63800	3.88074	0.000104552
5' ZDHHC17	KDM2B	SARC	84678.KDM2B@58079	3.87825	0.000105629
5' ERBB2	BRD3	BRCA	8019.BRD3@35874	-3.8775	0.000105954
5' ERBB2	NRF1	BRCA	4899.NRF1@46034	-3.87531	0.000106912
5' RAF1	KMT2A	THCA	4297.KMT2A@59165	3.87366	0.000107636
5' ERBB2	ZNF501	BRCA	115560.ZNF501@63631	3.86936	0.000109551
5' VPS13B	KDM2B	BRCA	84678.KDM2B@58083	-3.86895	0.000109733
3' RET	SMAD1	THCA	4086.SMAD1@8447	3.86548	0.000111306
5' TBCD	CHD8	BRCA	57680.CHD8@53400	3.86116	0.00011329
5' ARID1A	MYC	BRCA	4609.MYC@59542	-3.86067	0.000113519
5' ZDHHC17	LMNB1	SARC	4001.LMNB1@50122	-3.86058	0.00011356
5' EGFR	HDAC1	GBM	3065.HDAC1@8658	3.86012	0.00011378
5' NF1	ELF1	SARC	1997.ELF1@46127	-3.85617	0.000115625
5' NCOA4	SMAD1	THCA	4086.SMAD1@8447	3.85371	0.000116794
3' ABL1	ZNF687	LAML	57592.ZNF687@64786	3.85343	0.000117012
3' RET	FOXA1	THCA	3169.FOXA1@46368	-3.84975	0.000118697
5' ARID1A	RB1	BRCA	5925.RB1@49416	-3.84502	0.000121004
5' EGFR	STAT1	LGG	6772.STAT1@41286	-3.84493	0.000121048
5' ERBB2	FOXM1	BRCA	2305.FOXM1@43194	3.8368	0.000125124
5' CPS1	IRF2	LIHC	3660.IRF2@33542	-3.83497	0.00012606
5' EGFR	ZNF407	LGG	55628.ZNF407@38750	-3.82899	0.000129157
5' CPS1	SSRP1	LIHC	6749.SSRP1@63943	3.82168	0.000133043
5' ERBB2	RING1	BLCA	6015.RING1@41489	-3.8165	0.000135865
5' ERBB2	GATA3	BLCA	2625.GATA3@46361	3.81515	0.000136612
5' CCDC6	SUPT5H	THCA	6829.SUPT5H@58338	-3.8129	0.00013786
5' TBCD	RBL1	BRCA	5933.RBL1@38496	3.80584	0.000141849
3' RET	TFAP2C	THCA	7022.TFAP2C@39978	3.79952	0.000145512
5' ERBB2	H2AZ	BRCA	3015.H2AZ@45150	-3.79384	0.000148877
5' CCDC6	STAG1	THCA	10274.STAG1@42352	3.78991	0.000151254
5' TBCD	BRD4	BRCA	23476.BRD4@39035	-3.78724	0.000152886
5' NCOA4	RXRA	THCA	6256.RXRA@46356	-3.7867	0.000153213
5' NF1	KLF1	SARC	10661.KLF1@39350	-3.78303	0.000155489
5' EGFR	EHMT2	GBM	10919.EHMT2@52965	3.78289	0.000155584
5' TBCD	TRIM28	BRCA	10155.TRIM28@52087	3.78025	0.000157236
5' ERBB2	FOS	BLCA	2353.FOS@45999	3.77848	0.00015836
5' NF1	PHF8	SARC	23133.PHF8@1629	-3.77832	0.000158461
5' ERBB2	BCL6	BRCA	604.BCL6@52774	-3.77814	0.000158576
5' NF1	TAF1	SARC	6872.TAF1@46197	-3.77125	0.000163012
5' ZDHHC17	TCF21	SARC	6943.TCF21@52495	3.76915	0.000164388
5' EGFR	EMX1	LGG	2016.EMX1@44564	-3.76409	0.000167747
5' CPS1	PPARG	LIHC	5468.PPARG@50411	3.76181	0.000169288
5' ERBB2	LMNA	BLCA	4000.LMNA@34444	3.76111	0.000169758
5' EML4	PRDM1	LUAD	639.PRDM1@62702	-3.75362	0.000174912
5' ERBB2	NR2F6	BLCA	2063.NR2F6@63771	3.74257	0.000182781
3' ABL1	FOXM1	LAML	2305.FOXM1@46350	-3.73727	0.000186795
5' ERG	TBL1XR1	PRAD	79718.TBL1XR1@45660	3.73667	0.000187152
5' TBCD	ZNF138	BRCA	7697.ZNF138@63871	3.73593	0.000187667
5' VPS13B	FOXA2	BRCA	3170.FOXA2@52684	3.73553	0.000187968
5' ANK3	IRF4	BRCA	3662.IRF4@40215	3.73257	0.000190186
5' EGFR	ZNF346	GBM	23567.ZNF346@62900	3.72864	0.000193186
5' EGFR	FOXA1	GBM	3169.FOXA1@47329	-3.72594	0.000195261
3' ABL1	RELA	LAML	5970.RELA@32899	3.72404	0.000196863
5' VPS13B	BHLHE40	BRCA	8553.BHLHE40@45916	3.72065	0.000199385
3' RET	GTF2B	THCA	2959.GTF2B@56961	3.71877	0.000200874
5' EGFR	NFYA	LGG	4800.NFYA@38650	3.71509	0.00020382
5' ARID1A	ZNF217	BRCA	7764.ZNF217@45978	3.70512	0.000211998
5' ERG	SPDEF	PRAD	25803.SPDEF@35041	3.70403	0.000212947
5' CPS1	HNF4A	LIHC	3172.HNF4A@7343	-3.70168	0.000214893
5' TBCD	RAG2	BRCA	5897.RAG2@55543	-3.69972	0.000216556
5' ARID1A	ING5	BRCA	84289.ING5@41573	3.69903	0.000217143
5' EGFR	FOXM1	GBM	2305.FOXM1@53254	3.6901	0.000224909
5' ARID1A	KMT2A	BRCA	4297.KMT2A@59165	-3.68948	0.000225448
5' ANK3	SPDEF	BRCA	25803.SPDEF@35052	3.68637	0.000228223
5' ERBB2	KDM6B	BLCA	23135.KDM6B@48576	-3.68551	0.000228996
5' CCDC6	NFE2L1	THCA	4779.NFE2L1@64080	-3.681	0.000233078
5' NCOA4	MITF	THCA	4286.MITF@52548	-3.67795	0.000235885
5' VPS13B	ILK	BRCA	3611.ILK@64129	3.67675	0.00023699
5' CPS1	E2F8	LIHC	79733.E2F8@38804	3.66661	0.000246576
5' TBCD	NR2F1	BRCA	7025.NR2F1@56817	3.66652	0.000246663
5' NF1	EGR1	SARC	1958.EGR1@46169	3.66339	0.000249698
5' RAF1	GRHL1	THCA	29841.GRHL1@42850	3.66013	0.000252896
5' ERBB2	MAFB	BRCA	9935.MAFB@50112	-3.65227	0.00026076
5' TBCD	NCOA1	BRCA	8648.NCOA1@64887	3.64552	0.000267695
3' ABL1	IRF1	LAML	3659.IRF1@42725	-3.6452	0.000268193
5' ERBB2	FOSL2	BLCA	2355.FOSL2@64486	-3.64169	0.000271709
5' ERBB2	INTS3	BLCA	65123.INTS3@53323	-3.64061	0.000272848
5' ERBB2	TAF3	BRCA	83860.TAF3@38585	3.63928	0.000274252
5' EGFR	PHF8	GBM	23133.PHF8@45239	3.63773	0.000275915
5' CCDC6	E2F4	THCA	1874.E2F4@49480	3.6267	0.000287959
5' VPS13B	RUNX1T1	BRCA	862.RUNX1T1@39784	-3.62389	0.000291093
5' ARID1A	E2F3	BRCA	1871.E2F3@42712	-3.61822	0.000297537
5' ZDHHC17	C11orf30	SARC	56946.C11orf30@63363	3.61351	0.000303004
5' EGFR	E2F1	GBM	1869.E2F1@44339	3.60901	0.000308315
5' NF1	PAF1	SARC	54623.PAF1@55669	3.60821	0.000309251
5' EML4	ZSCAN22	LUAD	342945.ZSCAN22@65154	-3.60732	0.000310311
5' NCOA4	SMC3	THCA	9126.SMC3@62504	3.60303	0.000315482
5' ZDHHC17	DPF2	SARC	5977.DPF2@63061	3.60163	0.000317179
3' ABL1	KDM5B	LAML	10765.KDM5B@47278	3.59581	0.000324542
3' NSD1	TRIM22	BRCA	10346.TRIM22@64620	3.59196	0.000329182
5' EML4	EP300	LUAD	2033.EP300@41270	-3.58991	0.000331783
5' ARID1A	MAFG	BRCA	4097.MAFG@64575	3.58967	0.000332074
3' RET	FLI1	THCA	2313.FLI1@5441	3.58723	0.000335203
5' ARID1A	GATA3	BRCA	2625.GATA3@46058	3.5871	0.000335368
5' EML4	CASP8AP2	LUAD	9994.CASP8AP2@38860	3.58551	0.000337413
5' ERG	TRIM28	PRAD	10155.TRIM28@52087	-3.58308	0.000340629
5' ERBB2	DROSHA	BLCA	29102.DROSHA@63270	-3.57693	0.000348676
5' CPS1	PPARGC1A	LIHC	10891.PPARGC1A@45799	3.57681	0.000348841
5' ERG	TAF1	PRAD	6872.TAF1@46196	3.57664	0.00034911
5' ANK3	TTF2	BRCA	8458.TTF2@36230	-3.57566	0.000350363
3' RET	INTS3	THCA	65123.INTS3@53323	3.5744	0.000352062
5' ANK3	TFAP4	BRCA	7023.TFAP4@62715	-3.56075	0.000370863
5' RAF1	ERCC2	THCA	2068.ERCC2@41412	-3.56037	0.000371395
5' ZDHHC17	GATA4	SARC	2626.GATA4@63975	3.56008	0.000371803
5' VPS13B	KLF11	BRCA	8462.KLF11@50415	-3.55715	0.00037597
5' NF1	KLF5	SARC	688.KLF5@38831	-3.55676	0.000376535
5' EML4	TRRAP	LUAD	8295.TRRAP@1226	-3.55411	0.000380355
3' NSD1	LMNB1	BRCA	4001.LMNB1@50122	3.55074	0.000385248
3' RET	TFDP1	THCA	7027.TFDP1@62551	3.54963	0.00038687
3' NSD1	BRCA1	BRCA	672.BRCA1@44621	3.54843	0.000388631
5' CCDC6	SAP30	THCA	8819.SAP30@45419	3.54562	0.000392806
5' ANK3	AFF1	BRCA	4299.AFF1@34966	3.5444	0.00039462
5' ERBB2	BRD4	BLCA	23476.BRD4@39035	-3.54184	0.000398472
5' ERBB2	ELF1	BLCA	1997.ELF1@46323	-3.54003	0.000401205
5' ERBB2	MAFK	BRCA	7975.MAFK@45746	-3.53948	0.000402042
5' VPS13B	SAP30	BRCA	8819.SAP30@8800	-3.53652	0.000406578
5' TBCD	NR2F2	BRCA	7026.NR2F2@46309	-3.52577	0.000423425
5' EML4	DIDO1	LUAD	11083.DIDO1@62905	-3.52356	0.000426971
3' NSD1	ZNF101	BRCA	94039.ZNF101@63634	-3.5175	0.000436839
5' NCOA4	RFX2	THCA	5990.RFX2@38761	-3.51031	0.000448815
5' RAF1	KDM2B	THCA	84678.KDM2B@58083	-3.50601	0.000456123
3' ABL1	AFF4	LAML	27125.AFF4@48994	3.49708	0.0004719
5' ZDHHC17	NR2F2	SARC	7026.NR2F2@62909	3.49577	0.000473965
5' EML4	TFDP1	LUAD	7027.TFDP1@62551	-3.49541	0.000474618
5' NF1	BAHD1	SARC	22893.BAHD1@57659	-3.49187	0.000480941
5' NF1	CEBPB	SARC	1051.CEBPB@46149	-3.48727	0.000489281
5' TBCD	CASP8AP2	BRCA	9994.CASP8AP2@38860	-3.48582	0.000491933
5' CCDC6	ZNF467	THCA	168544.ZNF467@65062	3.48423	0.000494861
5' RAF1	AEBP2	THCA	121536.AEBP2@64455	3.4834	0.00049641
3' ABL1	ZNF781	LAML	163115.ZNF781@64496	-3.48324	0.000496953
5' RAF1	HOXB13	THCA	10481.HOXB13@56668	3.48236	0.000498341
5' TBCD	TAF1	BRCA	6872.TAF1@46197	3.48096	0.000500939
5' EGFR	MYH11	GBM	4629.MYH11@37623	3.47597	0.000510357
5' TBCD	TTF1	BRCA	7270.TTF1@47579	-3.4702	0.000521424
5' EGFR	CASP8AP2	GBM	9994.CASP8AP2@38860	-3.46973	0.000522369
5' NCOA4	ZNF92	THCA	168374.ZNF92@49482	3.46851	0.000524725
5' RAF1	EED	THCA	8726.EED@41187	-3.46795	0.000525818
5' NF1	BRD4	SARC	23476.BRD4@38340	-3.46483	0.000531952
5' ERBB2	KLF8	BLCA	11279.KLF8@64092	3.46251	0.000536552
5' VPS13B	FOS	BRCA	2353.FOS@45959	3.46213	0.000537311
5' ERBB2	BCAT1	BRCA	586.BCAT1@5455	-3.45257	0.000556706
5' ERG	ESR1	PRAD	2099.ESR1@36104	3.45011	0.000561878
5' ANK3	CDX2	BRCA	1045.CDX2@356	3.44846	0.000565224
5' TBCD	ELF1	BRCA	1997.ELF1@46127	-3.44828	0.000565621
5' ERBB2	ATF1	BRCA	466.ATF1@62671	3.4475	0.000567251
5' EGFR	CDK8	LGG	1024.CDK8@56369	3.44731	0.000567643
5' ANK3	FOXA1	BRCA	3169.FOXA1@46368	3.44522	0.000572055
5' ERG	ZSCAN16	PRAD	80345.ZSCAN16@65117	3.441	0.000581123
5' TBCD	CHD1	BRCA	1105.CHD1@36348	3.43924	0.000584835
5' TBCD	FOXA2	BRCA	3170.FOXA2@52684	3.43542	0.000593119
5' EGFR	DMC1	LGG	11144.DMC1@50422	3.4351	0.000593823
3' ABL1	CCDC101	LAML	112869.CCDC101@1228	3.4345	0.00059544
3' NSD1	CREM	BRCA	1390.CREM@64798	-3.4334	0.000597571
3' NSD1	ZNF574	BRCA	64763.ZNF574@65063	-3.4268	0.000612268
5' ZDHHC17	FOXA1	SARC	3169.FOXA1@47328	-3.42533	0.000615593
3' ABL1	SMAD1	LAML	4086.SMAD1@8447	-3.42539	0.000615755
5' ANK3	IRF5	BRCA	3663.IRF5@37185	-3.41941	0.000629115
5' ANK3	SUPT5H	BRCA	6829.SUPT5H@53325	3.41453	0.000640497
3' ABL1	TRIM28	LAML	10155.TRIM28@46046	3.41268	0.000645175
5' NF1	SETDB1	SARC	9869.SETDB1@45887	-3.41061	0.000649763
5' EGFR	SMAD3	GBM	4088.SMAD3@47576	-3.41035	0.000650395
5' ZDHHC17	ZZZ3	SARC	26009.ZZZ3@45735	-3.40838	0.00065509
5' EGFR	JARID2	GBM	3720.JARID2@41793	-3.40761	0.00065696
3' RET	H2AFZ	THCA	3015.H2AFZ@64752	-3.40705	0.000658304
3' NSD1	KLF9	BRCA	687.KLF9@62636	-3.40528	0.000662579
5' ERBB2	GTF2I	BRCA	2969.GTF2I@50714	3.40271	0.000668846
5' ANK3	LMNB1	BRCA	4001.LMNB1@50122	3.40244	0.0006695
5' NF1	GLI2	SARC	2736.GLI2@42715	3.40058	0.000674062
5' TBCD	FOXD2	BRCA	2306.FOXD2@38635	-3.39717	0.000682505
5' NCOA4	ZNF467	THCA	168544.ZNF467@65062	3.39544	0.000686825
5' EML4	ZNF101	LUAD	94039.ZNF101@63634	3.39303	0.000692921
3' ABL1	ASCL2	LAML	430.ASCL2@38812	-3.39179	0.000696378
5' CCDC6	MED1	THCA	5469.MED1@58341	-3.3908	0.000698575
5' RAF1	TAF1	THCA	6872.TAF1@46196	3.39061	0.000699048
5' ANK3	RFX5	BRCA	5993.RFX5@45730	-3.38939	0.000702164
3' ABL1	NIPBL	LAML	25836.NIPBL@50517	-3.38866	0.000704354
5' ERBB2	NIPBL	BLCA	25836.NIPBL@50516	-3.38813	0.000705407
3' NSD1	RUNX3	BRCA	864.RUNX3@46131	-3.38785	0.000706101
5' VPS13B	RBCK1	BRCA	10616.RBCK1@38695	-3.38591	0.000711131
5' ERBB2	VDR	BRCA	7421.VDR@566	-3.38477	0.000714086
5' ERBB2	DNMT3B	BLCA	1789.DNMT3B@62874	-3.38358	0.000717175
5' ANK3	CREBBP	BRCA	1387.CREBBP@42638	-3.38335	0.00071778
5' TBCD	PHF8	BRCA	23133.PHF8@1314	-3.38255	0.000719859
5' ERBB2	ZNF207	BLCA	7756.ZNF207@64209	-3.38026	0.000725906
5' EGFR	EP300	GBM	2033.EP300@36878	3.37717	0.000734119
5' ERBB2	GLIS1	BRCA	148979.GLIS1@63690	-3.37406	0.000742416
5' EGFR	IRF2	GBM	3660.IRF2@33542	3.37304	0.000745204
5' VPS13B	CBX5	BRCA	23468.CBX5@63410	3.37094	0.000750889
5' VPS13B	GATA4	BRCA	2626.GATA4@47602	3.36983	0.000753898
5' CCDC6	KLF4	THCA	9314.KLF4@48800	3.36727	0.000760941
5' RAF1	RELA	THCA	5970.RELA@1333	-3.36705	0.000761544
5' TBCD	KAT5	BRCA	10524.KAT5@4631	-3.36394	0.000770182
5' ERBB2	GATA6	BRCA	2627.GATA6@47433	3.36384	0.000770444
3' NSD1	CHAMP1	BRCA	283489.CHAMP1@62619	3.36288	0.000773129
5' NCOA4	BCL6	THCA	604.BCL6@58302	3.36143	0.000777215
5' VPS13B	TP53	BRCA	7157.TP53@44394	-3.36032	0.00078033
5' NCOA4	E2F8	THCA	79733.E2F8@38804	-3.35921	0.000783464
5' TBCD	HINFP	BRCA	25988.HINFP@64045	-3.35891	0.000784314
5' ERG	SP2	PRAD	6668.SP2@65084	-3.3563	0.000791845
5' NCOA4	KMT2A	THCA	4297.KMT2A@59165	3.35391	0.000798608
5' TBCD	H2AZ	BRCA	3015.H2AZ@6470	3.35347	0.000799884
5' CPS1	BRD4	LIHC	23476.BRD4@49977	-3.35031	0.000809071
3' RET	NFYA	THCA	4800.NFYA@2094	3.34745	0.000817458
5' ERG	MAX	PRAD	4149.MAX@33197	-3.34667	0.000819848
5' TBCD	POLR3D	BRCA	661.POLR3D@36361	-3.34435	0.000826624
5' CPS1	WRNIP1	LIHC	56897.WRNIP1@45630	-3.34399	0.000827703
5' ERBB2	ZNF781	BLCA	163115.ZNF781@64495	-3.34349	0.000829193
5' EML4	ZFX	LUAD	7543.ZFX@64866	3.34132	0.000835711
5' ERBB2	SMARCA5	BLCA	8467.SMARCA5@64776	-3.34007	0.000839464
5' ANK3	KDM4C	BRCA	23081.KDM4C@43684	3.33923	0.000842022
3' RET	PHF8	THCA	23133.PHF8@45239	3.33669	0.000849756
5' EGFR	DCP1A	GBM	55802.DCP1A@36231	3.33553	0.000853303
5' RAF1	FOXD2	THCA	2306.FOXD2@38635	-3.33333	0.000860063
5' EGFR	KLF9	GBM	687.KLF9@62636	3.33302	0.000861047
5' EML4	SP4	LUAD	6671.SP4@46179	3.32984	0.000870903
5' ERBB2	BAHD1	BLCA	22893.BAHD1@57659	3.32707	0.000879618
5' EGFR	ERCC6	LGG	2074.ERCC6@49036	3.32704	0.000879713
5' NF1	SIN3A	SARC	25942.SIN3A@46277	-3.32557	0.000884365
5' CCDC6	JUN	THCA	3725.JUN@55299	-3.32351	0.000890904
5' NF1	SMC1A	SARC	8243.SMC1A@56558	3.32178	0.000896444
5' ANK3	CTCFL	BRCA	140690.CTCFL@55779	-3.32147	0.000897432
3' RET	HINFP	THCA	25988.HINFP@64045	3.32046	0.000900706
5' ERBB2	ZBTB7B	BRCA	51043.ZBTB7B@38666	-3.3195	0.000903801
5' CPS1	GRHL2	LIHC	79977.GRHL2@35315	-3.31842	0.000907282
5' ARID1A	PYGO2	BRCA	90780.PYGO2@63514	-3.31679	0.000912603
5' RAF1	CTCF	THCA	10664.CTCF@47281	-3.31413	0.000921312
5' ERBB2	SMC1A	BRCA	8243.SMC1A@9317	3.31345	0.000923565
5' ERG	TEAD1	PRAD	7003.TEAD1@56542	-3.31274	0.00092602
5' VPS13B	SRCAP	BRCA	10847.SRCAP@44131	-3.31168	0.000929417
5' TBCD	HOXB13	BRCA	10481.HOXB13@56668	3.31141	0.000930297
5' NF1	SMAD4	SARC	4089.SMAD4@51574	-3.30888	0.000938741
3' NSD1	CSDE1	BRCA	7812.CSDE1@63484	-3.30651	0.00094674
5' ZDHHC17	SUZ12	SARC	23512.SUZ12@38163	3.30193	0.000962311
5' EGFR	CDK9	LGG	1025.CDK9@43081	3.29759	0.000977282
5' VPS13B	CHAMP1	BRCA	283489.CHAMP1@62620	3.29608	0.000982547
5' NF1	KDM5C	SARC	8242.KDM5C@8781	3.29568	0.000983955
5' EGFR	STAT3	GBM	6774.STAT3@42219	3.29275	0.000994285
5' ERG	MYOD1	PRAD	4654.MYOD1@36077	-3.29016	0.00100358
5' EML4	ATF7IP	LUAD	55729.ATF7IP@2972	-3.28885	0.00100815
5' EGFR	TSHZ1	GBM	10194.TSHZ1@63015	3.28687	0.00101526
5' EGFR	TCF12	LGG	6938.TCF12@46362	3.28619	0.00101768
3' ABL1	TCF12	LAML	6938.TCF12@46362	-3.28331	0.00102857
5' ERBB2	RBBP5	BLCA	5929.RBBP5@8820	3.27998	0.00104036
5' NF1	MYOD1	SARC	4654.MYOD1@36075	-3.27761	0.00104911
3' NSD1	ZNF589	BRCA	51385.ZNF589@64008	3.27755	0.00104932
5' CPS1	CCNT2	LIHC	905.CCNT2@45895	-3.27571	0.00105619
5' ERG	CIITA	PRAD	4261.CIITA@52784	3.27293	0.00106677
5' EGFR	E2F1	LGG	1869.E2F1@44313	3.27281	0.00106707
5' ERBB2	BARX1	BLCA	56033.BARX1@42752	3.2728	0.00106713
3' ABL1	KLF4	LAML	9314.KLF4@48552	3.2721	0.00107021
5' EGFR	GTF2I	LGG	2969.GTF2I@50712	3.26896	0.00108171
3' ABL1	RARA	LAML	5914.RARA@53300	-3.26825	0.00108485
5' EML4	MXI1	LUAD	4601.MXI1@45633	-3.26602	0.00109298
5' EGFR	RXRA	LGG	6256.RXRA@46192	-3.26261	0.00110622
5' EML4	YY1	LUAD	7528.YY1@63430	3.26158	0.00111026
5' ZDHHC17	ZNF84	SARC	7637.ZNF84@42891	-3.2611	0.0011121
5' ZDHHC17	MAX	SARC	4149.MAX@45749	-3.26108	0.00111217
5' EML4	PRDM11	LUAD	56981.PRDM11@52171	3.25926	0.00111936
5' ARID1A	HNF4G	BRCA	3174.HNF4G@63224	-3.25465	0.00113767
5' EML4	DROSHA	LUAD	29102.DROSHA@63270	-3.25337	0.0011428
5' NF1	ZNF18	SARC	7566.ZNF18@65171	3.25206	0.00114808
5' CCDC6	KAT8	THCA	84148.KAT8@4403	3.25164	0.00114977
3' NSD1	KDM4A	BRCA	9682.KDM4A@8816	-3.2509	0.00115279
5' NF1	IRF1	SARC	3659.IRF1@41301	-3.25052	0.00115432
5' RAF1	BATF	THCA	10538.BATF@48621	-3.24961	0.00115801
5' EML4	ETV5	LUAD	2119.ETV5@42714	-3.24881	0.00116128
5' ERBB2	ZNF384	BLCA	171017.ZNF384@45922	3.24876	0.00116149
5' RAF1	STAT1	THCA	6772.STAT1@41291	-3.24789	0.00116504
5' ERBB2	RBCK1	BRCA	10616.RBCK1@38695	-3.24588	0.00117328
5' VPS13B	CREB3	BRCA	10488.CREB3@62680	-3.24555	0.00117462
5' ANK3	ZNF138	BRCA	7697.ZNF138@63871	3.24173	0.00119048
5' VPS13B	ATF1	BRCA	466.ATF1@45871	3.24073	0.00119465
5' EGFR	ETV1	LGG	2115.ETV1@534	3.23676	0.00121138
5' EML4	MIER1	LUAD	57708.MIER1@63554	3.23636	0.0012131
5' EML4	CBX3	LUAD	11335.CBX3@46209	3.23439	0.0012215
5' VPS13B	ZNF92	BRCA	168374.ZNF92@49482	-3.23399	0.00122321
5' CCDC6	RAD51	THCA	5888.RAD51@63793	3.23382	0.00122391
5' CPS1	NCOA1	LIHC	8648.NCOA1@64888	-3.23258	0.00122927
5' VPS13B	CDK9	BRCA	1025.CDK9@40226	-3.23217	0.00123102
5' EML4	EZH2	LUAD	2146.EZH2@45490	-3.22668	0.00125486
5' NCOA4	DDX21	THCA	9188.DDX21@50210	3.2259	0.00125829
5' ERBB2	EHMT2	BLCA	10919.EHMT2@56446	-3.22364	0.00126824
5' ERBB2	ZFX	BLCA	7543.ZFX@64866	3.22332	0.00126967
5' ERBB2	CDK9	BLCA	1025.CDK9@53346	3.22307	0.00127076
5' ZDHHC17	EMX1	SARC	2016.EMX1@44563	-3.22287	0.00127167
5' EML4	MYH11	LUAD	4629.MYH11@37589	-3.22262	0.00127275
5' RAF1	NR3C1	THCA	2908.NR3C1@57915	-3.22245	0.00127354
5' CCDC6	DDX21	THCA	9188.DDX21@50210	3.21641	0.0013006
5' TBCD	ZNF264	BRCA	9422.ZNF264@63774	-3.21577	0.00130353
5' CCDC6	IRF2	THCA	3660.IRF2@33542	3.20714	0.00134324
5' NF1	RFX1	SARC	5989.RFX1@38784	3.20566	0.00135016
5' ANK3	CHD2	BRCA	1106.CHD2@45764	-3.20422	0.00135691
3' NSD1	SREBF1	BRCA	6720.SREBF1@45793	3.20364	0.00135966
5' EML4	ZNF414	LUAD	84330.ZNF414@63765	3.20254	0.00136486
3' ABL1	SUPT5H	LAML	6829.SUPT5H@64772	3.20137	0.00137092
5' ERBB2	NR2F2	BLCA	7026.NR2F2@62909	-3.19916	0.00138095
3' RET	SAP30	THCA	8819.SAP30@45419	3.19647	0.00139392
5' ERBB2	PML	BRCA	5371.PML@2448	3.19607	0.00139583
5' EGFR	KDM5B	GBM	10765.KDM5B@47283	-3.19353	0.00140819
5' CCDC6	CREB1	THCA	1385.CREB1@56047	-3.189	0.00143042
5' RAF1	NR2C2	THCA	7182.NR2C2@45800	-3.18807	0.00143499
5' NF1	AFF1	SARC	4299.AFF1@34966	-3.18785	0.00143608
5' TBCD	BRCA1	BRCA	672.BRCA1@44028	-3.18661	0.00144228
5' RAF1	EGR3	THCA	1960.EGR3@65186	3.18516	0.00144952
5' TBCD	GTF2B	BRCA	2959.GTF2B@56962	3.1843	0.00145383
5' ZDHHC17	DCP1A	SARC	55802.DCP1A@36226	-3.18311	0.0014598
3' ABL1	SOX9	LAML	6662.SOX9@53493	-3.1832	0.00145986
5' EGFR	FOXP1	LGG	27086.FOXP1@51750	-3.18035	0.00147378
5' NF1	ZNF22	SARC	7570.ZNF22@65178	-3.1782	0.00148471
5' CCDC6	ETV1	THCA	2115.ETV1@63176	3.17289	0.00151211
5' CCDC6	TFAP4	THCA	7023.TFAP4@62715	-3.17182	0.00151772
5' EML4	ZNF687	LUAD	57592.ZNF687@64787	3.17141	0.00151988
5' ANK3	E2F3	BRCA	1871.E2F3@42712	-3.17083	0.00152288
3' NSD1	TAF1	BRCA	6872.TAF1@46196	3.16907	0.00153214
3' NSD1	FOXD2	BRCA	2306.FOXD2@38635	-3.16863	0.00153443
5' ZDHHC17	POLR2B	SARC	5431.POLR2B@36356	3.16337	0.00156242
5' NF1	CREB3	SARC	10488.CREB3@38841	-3.16185	0.00157061
5' RAF1	RBBP5	THCA	5929.RBBP5@8819	3.16121	0.00157406
5' ERG	VDR	PRAD	7421.VDR@5451	3.15984	0.00158165
5' ERBB2	ZNF217	BRCA	7764.ZNF217@45978	-3.15733	0.00159517
5' NF1	ETV4	SARC	2118.ETV4@5924	3.1569	0.00159749
5' ERBB2	ZNF391	BLCA	346157.ZNF391@62985	-3.15674	0.00159836
5' VPS13B	RBL2	BRCA	5934.RBL2@38488	3.15409	0.00161296
5' EML4	ETS1	LUAD	2113.ETS1@49243	-3.15392	0.0016139
5' ERG	ETV5	PRAD	2119.ETV5@42714	-3.15394	0.00161396
5' ERG	NELFA	PRAD	7469.NELFA@43451	-3.15025	0.00163443
3' NSD1	FOSL1	BRCA	8061.FOSL1@46212	-3.1497	0.00163738
5' NCOA4	CHD1	THCA	1105.CHD1@36348	3.14926	0.00163986
5' NF1	ELK4	SARC	2005.ELK4@1215	3.14921	0.00164011
5' NF1	TBX21	SARC	30009.TBX21@33678	-3.14833	0.00164503
5' ERBB2	HES2	BLCA	54626.HES2@64218	-3.14413	0.00166882
5' RAF1	CCNT2	THCA	905.CCNT2@45895	3.14304	0.00167506
5' TBCD	HMGN3	BRCA	9324.HMGN3@45920	3.14039	0.00169027
3' ABL1	MNT	LAML	4335.MNT@38824	-3.13894	0.00169926
5' ERBB2	HMGN3	BLCA	9324.HMGN3@45920	3.13775	0.00170558
5' EGFR	NFE2	LGG	4778.NFE2@39357	-3.13654	0.00171258
5' ARID1A	CHD5	BRCA	26038.CHD5@40348	3.13207	0.00173886
5' ZDHHC17	NFRKB	SARC	4798.NFRKB@64144	-3.132	0.00173928
5' ARID1A	BCL3	BRCA	602.BCL3@46130	-3.12906	0.00175678
5' EML4	TBP	LUAD	6908.TBP@45618	3.12767	0.00176514
5' NCOA4	GRHL2	THCA	79977.GRHL2@35323	3.12718	0.00176808
5' ARID1A	CDK8	BRCA	1024.CDK8@56353	-3.12167	0.00180145
5' ZDHHC17	PPARG	SARC	5468.PPARG@50411	3.12043	0.00180908
3' NSD1	ERCC2	BRCA	2068.ERCC2@41412	-3.11487	0.00184349
5' EGFR	SMAD5	GBM	4090.SMAD5@63097	3.11454	0.0018456
5' NCOA4	MAZ	THCA	4150.MAZ@63210	3.11144	0.00186502
3' RET	RXRA	THCA	6256.RXRA@46356	-3.11051	0.00187093
5' CCDC6	USF1	THCA	7391.USF1@46347	-3.11026	0.00187248
5' ARID1A	ETS1	BRCA	2113.ETS1@49238	-3.10695	0.00189353
5' EGFR	ETS1	GBM	2113.ETS1@1938	-3.10679	0.00189461
5' EML4	RBBP5	LUAD	5929.RBBP5@8794	-3.10495	0.00190644
3' ABL1	TET3	LAML	200424.TET3@39719	-3.10477	0.00190824
5' VPS13B	HOXA2	BRCA	3199.HOXA2@38708	3.10293	0.00191944
5' NF1	NR2F1	SARC	7025.NR2F1@56817	3.10196	0.00192577
5' VPS13B	RAG2	BRCA	5897.RAG2@55543	-3.10151	0.00192871
5' ERBB2	PHF8	BLCA	23133.PHF8@1309	3.1012	0.00193069
5' ZDHHC17	TAF7	SARC	6879.TAF7@64178	3.10051	0.00193521
5' ERG	ZNF394	PRAD	84124.ZNF394@62792	-3.10042	0.00193595
5' ANK3	CHAMP1	BRCA	283489.CHAMP1@62620	3.09976	0.00194013
5' ZDHHC17	ZNF281	SARC	23528.ZNF281@65127	-3.09875	0.00194673
5' NCOA4	TAF3	THCA	83860.TAF3@38585	3.09795	0.00195198
5' ANK3	ZNF501	BRCA	115560.ZNF501@63632	-3.09576	0.00196644
5' NF1	CTCF	SARC	10664.CTCF@62979	-3.09428	0.00197627
5' ZDHHC17	SUPT5H	SARC	6829.SUPT5H@53325	-3.09313	0.00198396
5' NF1	MEF2C	SARC	4208.MEF2C@46144	-3.09247	0.00198834
3' ABL1	CDK8	LAML	1024.CDK8@57165	3.0925	0.00198883
5' ERBB2	ZNF24	BLCA	7572.ZNF24@62705	3.09135	0.00199586
5' ERBB2	SP7	BRCA	121340.SP7@63653	-3.08797	0.00201873
5' NF1	POLR2B	SARC	5431.POLR2B@9216	-3.08735	0.00202295
5' ERBB2	ZNF140	BLCA	7699.ZNF140@65113	3.08694	0.00202575
5' EGFR	POLR2B	GBM	5431.POLR2B@36356	-3.0868	0.00202673
5' RAF1	GATA1	THCA	2623.GATA1@8458	-3.08516	0.00203786
5' TBCD	DMC1	BRCA	11144.DMC1@50422	-3.08332	0.00205053
5' EGFR	HSF1	GBM	3297.HSF1@37134	-3.0819	0.00206032
5' ARID1A	GRHL3	BRCA	57822.GRHL3@33916	-3.08127	0.00206464
5' TBCD	KLF4	BRCA	9314.KLF4@48800	-3.08008	0.00207295
5' EGFR	TAL1	GBM	6886.TAL1@44433	3.07918	0.00207922
5' EGFR	UBTF	GBM	7343.UBTF@45961	-3.07834	0.00208511
5' ERBB2	STAT5A	BRCA	6776.STAT5A@46280	3.07792	0.00208801
5' NCOA4	C11orf30	THCA	56946.C11orf30@63363	-3.07686	0.00209541
5' ARID1A	SMAD3	BRCA	4088.SMAD3@39359	3.07504	0.00210826
3' RET	TP53	THCA	7157.TP53@50361	3.074	0.00211564
5' VPS13B	DPF2	BRCA	5977.DPF2@63061	-3.07361	0.0021184
5' ERBB2	TTF1	BRCA	7270.TTF1@47578	3.07102	0.00213683
5' ERG	NFATC1	PRAD	4772.NFATC1@38654	3.07083	0.00213839
5' TBCD	MAZ	BRCA	4150.MAZ@45924	3.07066	0.00213944
5' TBCD	POU2F2	BRCA	5452.POU2F2@46157	3.07022	0.00214254
5' ANK3	DNMT3B	BRCA	1789.DNMT3B@62874	3.06838	0.00215577
5' NCOA4	TFAP2C	THCA	7022.TFAP2C@39978	3.06781	0.00215991
5' EGFR	KAT2B	LGG	8850.KAT2B@45418	3.06778	0.00216009
5' EGFR	ZNF687	LGG	57592.ZNF687@64787	-3.06676	0.00216752
5' ERBB2	PRDM1	BLCA	639.PRDM1@45747	3.06669	0.00216806
5' CPS1	RAD21	LIHC	5885.RAD21@46275	3.06569	0.00217526
5' ARID1A	MED1	BRCA	5469.MED1@56355	-3.06379	0.00218915
5' VPS13B	SMC3	BRCA	9126.SMC3@38811	-3.06363	0.00219028
3' ABL1	ERCC6	LAML	2074.ERCC6@49036	3.06298	0.00219577
5' ANK3	RELA	BRCA	5970.RELA@45668	-3.06107	0.00220912
5' ARID1A	MTA2	BRCA	9219.MTA2@63212	3.06037	0.00221425
3' RET	TET2	THCA	54790.TET2@33992	-3.05991	0.00221767
5' CPS1	MYBL2	LIHC	4605.MYBL2@46241	3.0591	0.00222371
3' ABL1	ZNF350	LAML	59348.ZNF350@65131	3.05361	0.00226547
3' ABL1	ZBTB48	LAML	3104.ZBTB48@65155	-3.05298	0.00227024
3' RET	SPI1	THCA	6688.SPI1@50367	3.05193	0.00227749
5' ERBB2	BCL6	BLCA	604.BCL6@52303	3.05054	0.00228803
5' TBCD	MAX	BRCA	4149.MAX@46094	-3.04868	0.00230223
5' VPS13B	ZNF641	BRCA	121274.ZNF641@63951	3.0486	0.00230284
5' NF1	CBFB	SARC	865.CBFB@37604	3.04794	0.00230793
5' NCOA4	ZNF146	THCA	7705.ZNF146@64240	-3.04783	0.0023087
5' EGFR	SPI1	GBM	6688.SPI1@50367	-3.04477	0.00233239
5' RAF1	ZNF654	THCA	55279.ZNF654@63738	3.04117	0.0023604
5' TBCD	MXI1	BRCA	4601.MXI1@45879	-3.04078	0.00236344
5' CPS1	ZEB1	LIHC	6935.ZEB1@46245	-3.03743	0.00238985
5' ERBB2	TCF7L2	BLCA	6934.TCF7L2@36841	3.03735	0.00239054
5' EGFR	ZBTB33	GBM	10009.ZBTB33@64738	-3.03622	0.00239952
5' CCDC6	E2F1	THCA	1869.E2F1@44312	-3.03563	0.00240414
5' NF1	DNMT3B	SARC	1789.DNMT3B@62875	-3.0352	0.0024076
5' EGFR	SP2	GBM	6668.SP2@46287	3.03368	0.00241979
5' VPS13B	SRC	BRCA	6714.SRC@6710	3.03301	0.00242515
5' TBCD	ERCC2	BRCA	2068.ERCC2@41412	-3.03281	0.00242676
5' EML4	EHF	LUAD	26298.EHF@38657	3.03197	0.00243352
5' ARID1A	MEF2D	BRCA	4209.MEF2D@64127	-3.02843	0.00246213
5' TBCD	EZH1	BRCA	2145.EZH1@50378	3.02835	0.0024628
5' EML4	EPAS1	LUAD	2034.EPAS1@5516	3.02426	0.00249636
5' ANK3	ZNF518A	BRCA	9849.ZNF518A@62888	3.02355	0.00250216
3' RET	TAF7	THCA	6879.TAF7@64178	-3.023	0.00250678
3' RET	SMAD5	THCA	4090.SMAD5@63097	3.02106	0.00252291
5' ARID1A	ZZZ3	BRCA	26009.ZZZ3@45648	3.01916	0.0025387
5' TBCD	E2F8	BRCA	79733.E2F8@38804	-3.01868	0.00254279
5' ZDHHC17	STAT1	SARC	6772.STAT1@41291	3.01755	0.00255221
5' EGFR	ZFP69B	LGG	65243.ZFP69B@63423	3.01747	0.00255289
5' TBCD	ESRRA	BRCA	2101.ESRRA@45627	-3.01733	0.00255411
5' TBCD	PBX2	BRCA	5089.PBX2@64083	-3.01614	0.00256411
5' EML4	THAP11	LUAD	57215.THAP11@51612	-3.01535	0.00257087
5' NF1	RXRA	SARC	6256.RXRA@5453	-3.0135	0.00258656
3' ABL1	PML	LAML	5371.PML@2809	-3.01171	0.00260262
5' ERBB2	ZNF382	BLCA	84911.ZNF382@64693	3.01062	0.00261119
5' ZDHHC17	RELA	SARC	5970.RELA@45641	3.00954	0.00262046
3' ABL1	STAT5B	LAML	6777.STAT5B@53637	-3.00963	0.00262051
5' RAF1	EGR1	THCA	1958.EGR1@46319	3.00882	0.00262671
3' NSD1	NKRF	BRCA	55922.NKRF@63302	3.00669	0.00264513
5' ERG	RAD21	PRAD	5885.RAD21@46084	-3.00404	0.00266856
5' EML4	TEAD4	LUAD	7004.TEAD4@46315	-3.00393	0.00266927
5' TBCD	ARNT2	BRCA	9915.ARNT2@42707	3.00319	0.00267572
5' ERG	CHD8	PRAD	57680.CHD8@51103	2.99946	0.0027089
3' ABL1	CHD8	LAML	57680.CHD8@51104	2.99945	0.00270959
5' ERG	MBD2	PRAD	8932.MBD2@48826	2.99641	0.00273622
5' TBCD	SPDEF	BRCA	25803.SPDEF@35052	2.99274	0.00276903
3' RET	ZBTB11	THCA	27107.ZBTB11@64291	2.99189	0.00277674
5' ZDHHC17	PAF1	SARC	54623.PAF1@36343	-2.99188	0.00277683
5' NF1	SRF	SARC	6722.SRF@46148	-2.99163	0.00277913
3' NSD1	CHRM2	BRCA	1129.CHRM2@43234	2.99026	0.0027916
5' EGFR	MED12	GBM	9968.MED12@38653	2.99002	0.00279389
5' EGFR	FOXA1	LGG	3169.FOXA1@47330	-2.98838	0.0028088
5' ZDHHC17	EHMT2	SARC	10919.EHMT2@56463	-2.98735	0.00281829
5' ERBB2	SIN3A	BLCA	25942.SIN3A@46327	2.9872	0.00281973
5' NF1	FOXG1	SARC	2290.FOXG1@38827	2.98667	0.00282461
5' VPS13B	BACH1	BRCA	571.BACH1@64378	-2.98546	0.00283576
3' NSD1	USF2	BRCA	7392.USF2@45694	-2.98408	0.00284861
5' EGFR	TCF21	GBM	6943.TCF21@52495	-2.98332	0.00285568
3' NSD1	KDM6B	BRCA	23135.KDM6B@48443	2.98298	0.00285886
5' CPS1	KLF4	LIHC	9314.KLF4@33718	2.98258	0.00286258
5' NF1	WDR5	SARC	11091.WDR5@52432	2.98253	0.00286309
3' RET	BCL6	THCA	604.BCL6@58302	2.98199	0.0028681
3' ABL1	NFATC1	LAML	4772.NFATC1@38742	2.98169	0.00287173
5' ANK3	DNMT1	BRCA	1786.DNMT1@65041	-2.97969	0.0028897
5' ANK3	EHF	BRCA	26298.EHF@38657	2.97966	0.00289
3' NSD1	ZNF687	BRCA	57592.ZNF687@64786	-2.97959	0.00289068
5' EML4	FOXA1	LUAD	3169.FOXA1@47329	-2.9795	0.00289156
3' NSD1	TOP1	BRCA	7150.TOP1@51841	-2.97733	0.00291206
5' RAF1	TTF1	THCA	7270.TTF1@47579	2.97651	0.00291981
5' CCDC6	ILK	THCA	3611.ILK@64129	-2.97578	0.00292679
5' ERBB2	KLF1	BRCA	10661.KLF1@63869	2.97321	0.00295137
5' EGFR	NFE2L2	LGG	4780.NFE2L2@64299	-2.97015	0.00298095
3' RET	HSF1	THCA	3297.HSF1@51863	2.96889	0.00299321
5' TBCD	BCLAF1	BRCA	9774.BCLAF1@46288	-2.96522	0.00302912
5' CCDC6	GRHL2	THCA	79977.GRHL2@35323	2.96413	0.00303985
5' EGFR	SP2	LGG	6668.SP2@64560	2.96344	0.00304665
5' ANK3	PROX1	BRCA	5629.PROX1@49669	-2.96304	0.0030506
5' NF1	ZNF24	SARC	7572.ZNF24@62704	2.96268	0.00305423
5' NCOA4	FLI1	THCA	2313.FLI1@5441	2.95967	0.00308418
3' RET	ZNF558	THCA	148156.ZNF558@63608	2.95881	0.0030928
5' NCOA4	USF1	THCA	7391.USF1@46365	-2.95853	0.0030956
5' CCDC6	EGR1	THCA	1958.EGR1@46126	2.95821	0.00309878
3' NSD1	GATA2	BRCA	2624.GATA2@58874	-2.95676	0.00311345
5' CPS1	NBN	LIHC	4683.NBN@63182	-2.95651	0.00311591
5' EGFR	GMEB2	LGG	26205.GMEB2@38724	2.95625	0.00311854
5' EGFR	RAD21	GBM	5885.RAD21@38691	-2.95492	0.00313205
5' NCOA4	ESRRA	THCA	2101.ESRRA@45627	-2.95363	0.00314518
5' NCOA4	SPI1	THCA	6688.SPI1@34565	2.95309	0.00315062
5' EML4	KLF9	LUAD	687.KLF9@62636	2.95287	0.00315286
3' NSD1	MBD2	BRCA	8932.MBD2@48826	-2.95064	0.0031757
5' ZDHHC17	SPI1	SARC	6688.SPI1@48275	2.94824	0.00320049
5' ZDHHC17	CDX2	SARC	1045.CDX2@356	-2.94643	0.0032193
3' NSD1	TARDBP	BRCA	23435.TARDBP@62580	-2.94557	0.00322819
5' CPS1	ATF3	LIHC	467.ATF3@63684	-2.94555	0.00322844
3' ABL1	ZNF281	LAML	23528.ZNF281@65127	2.94521	0.00323292
5' TBCD	SRC	BRCA	6714.SRC@6710	-2.9428	0.00325723
5' TBCD	PRDM1	BRCA	639.PRDM1@62702	2.93944	0.00329275
5' RAF1	TAL1	THCA	6886.TAL1@37596	-2.93913	0.00329602
5' ANK3	HDAC1	BRCA	3065.HDAC1@37597	2.93911	0.0032962
5' ERBB2	ETS2	BLCA	2114.ETS2@38712	2.93895	0.00329791
5' EGFR	SMARCC1	GBM	6599.SMARCC1@1346	-2.93616	0.00332783
5' EGFR	RBBP5	GBM	5929.RBBP5@8820	-2.9337	0.0033542
5' ERBB2	TCF12	BRCA	6938.TCF12@46085	2.93155	0.00337749
5' EGFR	EPAS1	GBM	2034.EPAS1@5516	2.93086	0.00338501
5' EML4	JARID2	LUAD	3720.JARID2@41797	2.92896	0.00340581
5' ZDHHC17	KLF9	SARC	687.KLF9@62636	-2.92843	0.00341153
5' RAF1	LMNB1	THCA	4001.LMNB1@50122	2.92626	0.00343547
5' CCDC6	FOS	THCA	2353.FOS@1741	2.92613	0.00343682
5' ARID1A	POLR2B	BRCA	5431.POLR2B@36356	-2.92461	0.00345369
3' NSD1	AFF4	BRCA	27125.AFF4@48993	-2.92431	0.00345704
5' ERBB2	ESRRA	BLCA	2101.ESRRA@45796	-2.92356	0.00346534
5' CPS1	EOMES	LIHC	8320.EOMES@51445	-2.92304	0.00347115
5' EGFR	DMC1	GBM	11144.DMC1@50422	-2.9173	0.00353569
5' ERG	TAF7	PRAD	6879.TAF7@46195	-2.9165	0.00354501
5' ZDHHC17	PRDM1	SARC	639.PRDM1@45747	2.9138	0.00357554
5' ANK3	CDK6	BRCA	1021.CDK6@43305	-2.90783	0.00364445
5' ZDHHC17	SP3	SARC	6670.SP3@62841	2.90649	0.00366006
3' RET	EGR3	THCA	1960.EGR3@65186	2.90563	0.00367015
5' TBCD	NIPBL	BRCA	25836.NIPBL@9320	-2.90498	0.00367774
3' RET	NELFE	THCA	7936.NELFE@53324	-2.90403	0.00368897
5' ARID1A	RBBP5	BRCA	5929.RBBP5@45421	-2.9018	0.00371524
5' EML4	TET2	LUAD	54790.TET2@33992	-2.89976	0.00373959
3' ABL1	USF1	LAML	7391.USF1@46365	-2.89801	0.00376147
3' NSD1	HDAC2	BRCA	3066.HDAC2@46304	2.89742	0.00376757
3' NSD1	CHD5	BRCA	26038.CHD5@40348	2.89679	0.00377505
5' RAF1	E2F7	THCA	144455.E2F7@38698	2.8952	0.00379432
3' NSD1	KLF12	BRCA	11278.KLF12@65071	2.89377	0.00381162
5' RAF1	ZNF329	THCA	79673.ZNF329@65060	-2.89346	0.0038153
5' NCOA4	H2AFZ	THCA	3015.H2AFZ@64752	-2.89331	0.00381721
5' ANK3	T	BRCA	6862.T@43978	2.89238	0.00382841
5' ARID1A	RUNX1	BRCA	861.RUNX1@384	2.89133	0.00384121
5' VPS13B	NELFA	BRCA	7469.NELFA@43451	-2.88991	0.00385862
5' ERBB2	ADNP	BRCA	23394.ADNP@63582	-2.88986	0.00385927
3' NSD1	FOXM1	BRCA	2305.FOXM1@34997	2.88903	0.00386944
3' NSD1	SPI1	BRCA	6688.SPI1@48275	-2.88758	0.00388729
5' NF1	CSDE1	SARC	7812.CSDE1@63484	-2.88679	0.00389709
5' CPS1	C11orf30	LIHC	56946.C11orf30@63363	-2.88671	0.00389817
5' ZDHHC17	ESRRA	SARC	2101.ESRRA@45796	2.8852	0.00391681
5' TBCD	SMARCC1	BRCA	6599.SMARCC1@1346	2.88455	0.00392489
5' EML4	GATA1	LUAD	2623.GATA1@8458	-2.88341	0.00393922
5' ERBB2	LARP7	BLCA	51574.LARP7@57091	-2.88122	0.00396658
5' ZDHHC17	TAF1	SARC	6872.TAF1@46221	-2.88062	0.00397415
5' CPS1	BRD3	LIHC	8019.BRD3@44597	-2.87902	0.00399439
5' VPS13B	GMEB1	BRCA	10691.GMEB1@38799	2.87889	0.00399609
5' ERBB2	MBD2	BLCA	8932.MBD2@48826	-2.87775	0.00401045
5' EML4	ZNF16	LUAD	7564.ZNF16@62681	2.87748	0.00401398
5' TBCD	H2AFX	BRCA	3014.H2AFX@56131	2.87708	0.00401905
5' NF1	RING1	SARC	6015.RING1@43560	2.87563	0.00403745
5' TBCD	IKZF1	BRCA	10320.IKZF1@63463	2.87454	0.00405143
5' CCDC6	JUND	THCA	3727.JUND@46351	2.87292	0.0040723
5' EGFR	MAF	LGG	4094.MAF@58807	-2.87234	0.0040797
3' RET	JUN	THCA	3725.JUN@55300	-2.87101	0.00409699
5' ZDHHC17	TP53	SARC	7157.TP53@52090	-2.87065	0.00410158
5' ERBB2	SETDB1	BRCA	9869.SETDB1@2124	-2.87057	0.00410268
5' TBCD	RFX1	BRCA	5989.RFX1@64988	-2.87047	0.00410396
5' CPS1	NKRF	LIHC	55922.NKRF@63302	-2.86954	0.00411611
5' NCOA4	PAX6	THCA	5080.PAX6@50898	2.86919	0.00412055
5' NF1	KLF4	SARC	9314.KLF4@33718	-2.86873	0.00412655
5' TBCD	EHF	BRCA	26298.EHF@38657	2.86727	0.00414572
5' TBCD	LMO2	BRCA	4005.LMO2@49739	2.86671	0.00415305
5' ERBB2	CDK8	BLCA	1024.CDK8@43642	-2.86611	0.00416092
5' ANK3	RARA	BRCA	5914.RARA@2811	-2.86586	0.00416419
5' ZDHHC17	BRD3	SARC	8019.BRD3@43051	2.86572	0.00416599
5' RAF1	ZNF143	THCA	7702.ZNF143@45629	2.86527	0.00417198
5' CPS1	NELFA	LIHC	7469.NELFA@55468	-2.86427	0.00418509
5' RAF1	ZNF197	THCA	10168.ZNF197@63956	-2.86253	0.00420816
5' ANK3	KLF4	BRCA	9314.KLF4@48800	-2.8573	0.00427802
3' RET	ZNF280D	THCA	54816.ZNF280D@63619	2.85623	0.0042926
5' ERBB2	GATA1	BRCA	2623.GATA1@8458	2.85616	0.00429341
5' CPS1	EGR2	LIHC	1959.EGR2@65179	2.85499	0.00430934
5' EML4	KDM1A	LUAD	23028.KDM1A@55324	-2.85392	0.00432391
5' CCDC6	ZNF366	THCA	167465.ZNF366@62732	2.85328	0.00433258
3' RET	IRF4	THCA	3662.IRF4@40215	2.85273	0.00434006
3' RET	USF1	THCA	7391.USF1@46365	-2.85102	0.00436352
3' NSD1	SCRT1	BRCA	83482.SCRT1@64013	-2.851	0.00436367
5' VPS13B	NCAPG	BRCA	64151.NCAPG@54625	-2.84987	0.00437922
5' ERG	KLF8	PRAD	11279.KLF8@64092	-2.84929	0.00438752
5' ERBB2	PPARG	BRCA	5468.PPARG@5882	2.84576	0.00443616
5' ZDHHC17	NOTCH1	SARC	4851.NOTCH1@43104	-2.8457	0.00443705
5' RAF1	GATAD1	THCA	57798.GATAD1@1219	-2.84455	0.00445309
5' EGFR	NELFA	LGG	7469.NELFA@43451	-2.84176	0.00449212
5' CCDC6	MAFK	THCA	7975.MAFK@45746	2.84041	0.00451116
5' ARID1A	CASP8AP2	BRCA	9994.CASP8AP2@38860	2.83968	0.00452146
5' EGFR	BCOR	LGG	54880.BCOR@35528	2.83965	0.00452202
5' EGFR	KAT5	GBM	10524.KAT5@4631	2.83881	0.004534
3' ABL1	HDAC2	LAML	3066.HDAC2@8659	-2.83834	0.00454164
5' VPS13B	HIRA	BRCA	7290.HIRA@50174	-2.83756	0.00455161
5' ERBB2	ZNF260	BRCA	339324.ZNF260@65157	-2.83311	0.00461542
5' EGFR	HMBOX1	GBM	79618.HMBOX1@64414	-2.8298	0.00466347
5' ERBB2	RXRA	BRCA	6256.RXRA@46242	2.82948	0.00466813
5' ERG	GMEB2	PRAD	26205.GMEB2@38724	2.82734	0.00469976
5' ERBB2	TOP1	BRCA	7150.TOP1@51840	-2.82585	0.00472129
5' ERG	ZNF263	PRAD	10127.ZNF263@45726	2.82431	0.00474438
3' NSD1	E2F1	BRCA	1869.E2F1@1212	-2.82337	0.00475799
3' RET	KAT8	THCA	84148.KAT8@4403	2.82292	0.00476465
3' RET	ZNF318	THCA	24149.ZNF318@63364	-2.82126	0.00478938
3' RET	TAF3	THCA	83860.TAF3@38585	2.82106	0.0047924
3' ABL1	ZNF138	LAML	7697.ZNF138@63871	2.81867	0.00482936
5' NF1	TP73	SARC	7161.TP73@38832	2.81842	0.00483187
5' VPS13B	ZNF35	BRCA	7584.ZNF35@65180	-2.81772	0.00484254
5' EML4	DMC1	LUAD	11144.DMC1@50422	-2.81608	0.0048673
5' VPS13B	NRF1	BRCA	4899.NRF1@58936	-2.81245	0.00492244
5' VPS13B	EPO	BRCA	2056.EPO@57111	-2.81168	0.0049343
3' NSD1	MLLT1	BRCA	4298.MLLT1@59168	-2.81137	0.00493903
5' NF1	RB1	SARC	5925.RB1@36028	-2.81055	0.00495161
5' CPS1	SMC1A	LIHC	8243.SMC1A@56557	-2.8098	0.00496327
5' ANK3	SREBF1	BRCA	6720.SREBF1@45793	2.80904	0.00497488
3' ABL1	EOMES	LAML	8320.EOMES@1006	-2.8075	0.00499995
5' ARID1A	WDR5	BRCA	11091.WDR5@49877	-2.80654	0.00501373
5' CCDC6	TP53	THCA	7157.TP53@33075	2.80633	0.00501702
5' VPS13B	GABPA	BRCA	2551.GABPA@46185	-2.80582	0.00502492
5' EGFR	ZNF18	GBM	7566.ZNF18@65019	2.80358	0.00505998
5' EML4	RUNX2	LUAD	860.RUNX2@5373	2.80268	0.00507408
5' EGFR	DPF2	GBM	5977.DPF2@63061	2.80067	0.0051058
5' VPS13B	MED1	BRCA	5469.MED1@58316	-2.79982	0.00511922
5' ANK3	FOXK2	BRCA	3607.FOXK2@63744	-2.79915	0.00512987
5' CCDC6	ZNF280D	THCA	54816.ZNF280D@63619	2.79597	0.00518054
3' RET	MAF	THCA	4094.MAF@58809	2.79548	0.00518838
5' TBCD	CHAMP1	BRCA	283489.CHAMP1@62620	2.79499	0.00519634
5' CCDC6	SMAD1	THCA	4086.SMAD1@8447	2.79236	0.00523873
5' VPS13B	PROX1	BRCA	5629.PROX1@49669	-2.79122	0.00525711
5' TBCD	CBFB	BRCA	865.CBFB@37604	2.78946	0.00528572
5' ERG	ZNF384	PRAD	171017.ZNF384@45634	2.7876	0.00531652
3' NSD1	TCF7L1	BRCA	83439.TCF7L1@40166	2.78729	0.00532132
5' CCDC6	CREBBP	THCA	1387.CREBBP@2748	2.78639	0.00533609
5' RAF1	BCOR	THCA	54880.BCOR@64563	2.78606	0.0053416
5' ERG	YY1	PRAD	7528.YY1@62486	2.78556	0.00535015
5' ZDHHC17	PBX3	SARC	5090.PBX3@56901	-2.78334	0.0053865
3' RET	BHLHE40	THCA	8553.BHLHE40@45807	-2.78272	0.00539687
5' CCDC6	SPI1	THCA	6688.SPI1@56953	2.78249	0.00540069
5' ZDHHC17	ZNF382	SARC	84911.ZNF382@64693	-2.78201	0.00540859
5' ERBB2	CBX8	BRCA	57332.CBX8@43558	2.78004	0.00544144
5' EGFR	ATF7IP	LGG	55729.ATF7IP@2972	2.77938	0.00545251
5' EML4	BCAT1	LUAD	586.BCAT1@5455	2.77892	0.00546025
5' TBCD	BRD2	BRCA	6046.BRD2@43045	-2.77865	0.0054648
5' NCOA4	HDAC2	THCA	3066.HDAC2@8659	-2.77582	0.00551261
5' TBCD	TCF4	BRCA	6925.TCF4@47101	-2.77438	0.00553702
3' ABL1	ZBTB7A	LAML	51341.ZBTB7A@46102	2.77429	0.00553989
3' RET	KLF11	THCA	8462.KLF11@50412	-2.77403	0.0055431
5' RAF1	KDM5A	THCA	5927.KDM5A@45244	-2.7735	0.00555208
5' NF1	THAP11	SARC	57215.THAP11@51612	2.77253	0.00556858
3' ABL1	PBX2	LAML	5089.PBX2@64083	2.77196	0.0055796
5' EGFR	CTCFL	LGG	140690.CTCFL@55784	-2.77155	0.00558544
5' NF1	ETS1	SARC	2113.ETS1@43097	2.7703	0.00560686
5' EML4	LMNA	LUAD	4000.LMNA@34444	2.76914	0.00562693
5' RAF1	C11orf30	THCA	56946.C11orf30@63362	-2.76904	0.00562863
5' ERBB2	IRF1	BLCA	3659.IRF1@42725	-2.76885	0.00563195
5' ZDHHC17	PHF8	SARC	23133.PHF8@1628	-2.7685	0.00563802
5' VPS13B	TAF1	BRCA	6872.TAF1@46334	-2.76695	0.00566477
3' NSD1	PROX1	BRCA	5629.PROX1@49669	-2.76523	0.0056948
5' EGFR	JUN	LGG	3725.JUN@45685	2.76285	0.00573646
3' ABL1	CBX3	LAML	11335.CBX3@9230	2.76197	0.00575316
3' NSD1	SNAPC1	BRCA	6617.SNAPC1@35268	2.75911	0.00580237
5' EGFR	CHD8	LGG	57680.CHD8@51103	2.75869	0.0058099
5' TBCD	VEZF1	BRCA	7716.VEZF1@8532	2.75773	0.00582698
5' ZDHHC17	NELFE	SARC	7936.NELFE@53324	2.75746	0.00583183
5' ARID1A	BACH2	BRCA	60468.BACH2@55549	2.75675	0.0058445
5' NF1	SPI1	SARC	6688.SPI1@46156	-2.75606	0.00585672
3' NSD1	EMX1	BRCA	2016.EMX1@44564	2.75391	0.00589532
3' RET	MED1	THCA	5469.MED1@33198	2.75386	0.00589628
3' ABL1	BRCA1	LAML	672.BRCA1@44621	2.75347	0.00590467
5' EGFR	FOXO1	GBM	2308.FOXO1@54243	-2.7534	0.00590469
5' ZDHHC17	RUNX1T1	SARC	862.RUNX1T1@39784	2.75196	0.00593063
5' TBCD	EPAS1	BRCA	2034.EPAS1@5516	-2.74907	0.00598319
5' TBCD	CBX5	BRCA	23468.CBX5@63410	2.74847	0.00599402
5' ANK3	PKNOX1	BRCA	5316.PKNOX1@62762	2.74821	0.0059988
5' ARID1A	EPO	BRCA	2056.EPO@57110	-2.74795	0.00600366
5' CPS1	GATA4	LIHC	2626.GATA4@63975	-2.74712	0.00601877
5' CCDC6	ZBTB17	THCA	7709.ZBTB17@41831	-2.74501	0.00605768
5' ZDHHC17	ZNF750	SARC	79755.ZNF750@48799	-2.74408	0.00607476
5' ERBB2	STAT3	BRCA	6774.STAT3@34236	2.74321	0.00609086
5' VPS13B	TBP	BRCA	6908.TBP@37584	-2.74161	0.00612058
5' NF1	GLYR1	SARC	84656.GLYR1@1225	-2.7414	0.00612448
5' ANK3	ZEB1	BRCA	6935.ZEB1@46245	2.74096	0.00613267
5' ERG	RFX5	PRAD	5993.RFX5@45730	-2.74023	0.00614677
5' ERBB2	CREB1	BLCA	1385.CREB1@56047	2.73856	0.00617769
5' CCDC6	BRD4	THCA	23476.BRD4@39002	-2.73799	0.00618839
5' ERBB2	RARG	BRCA	5916.RARG@49617	2.73759	0.00619585
3' RET	C11orf30	THCA	56946.C11orf30@63363	-2.73646	0.00621729
5' CPS1	FOXP2	LIHC	93986.FOXP2@46340	-2.73519	0.00624129
3' RET	CREB1	THCA	1385.CREB1@56047	-2.7347	0.0062506
5' ZDHHC17	NFE2L2	SARC	4780.NFE2L2@62958	-2.73064	0.00632799
5' NCOA4	FOSL1	THCA	8061.FOSL1@46212	-2.72923	0.00635504
5' ARID1A	CREBBP	BRCA	1387.CREBBP@3038	2.72607	0.00641634
5' ERBB2	ATOH1	BLCA	474.ATOH1@38856	-2.72507	0.00643565
5' ERBB2	SP1	BLCA	6667.SP1@46215	2.72287	0.00647866
5' EML4	KAT8	LUAD	84148.KAT8@4403	2.72178	0.00650005
3' ABL1	ING2	LAML	3622.ING2@41572	2.7195	0.00654644
5' ERBB2	CDK2	BLCA	1017.CDK2@43676	-2.71937	0.00654771
5' ERBB2	ZNF792	BRCA	126375.ZNF792@64201	-2.71822	0.00657051
5' EGFR	H2AFZ	LGG	3015.H2AFZ@63401	2.71503	0.0066341
5' TBCD	HNF1A	BRCA	6927.HNF1A@64546	-2.71433	0.00664809
5' ZDHHC17	MYC	SARC	4609.MYC@52428	-2.71297	0.00667535
5' NF1	TP53	SARC	7157.TP53@52092	-2.71293	0.00667618
5' EML4	ZFP42	LUAD	132625.ZFP42@51548	-2.71274	0.00668005
5' ERBB2	MTA3	BRCA	57504.MTA3@46147	-2.71196	0.00669573
5' ARID1A	STAT1	BRCA	6772.STAT1@41291	2.71174	0.00670014
5' ERBB2	HSF1	BRCA	3297.HSF1@54574	2.71161	0.00670284
5' ARID1A	USF1	BRCA	7391.USF1@46078	2.71131	0.00670882
5' ANK3	IRF1	BRCA	3659.IRF1@41301	-2.71113	0.00671246
5' EML4	RUNX1T1	LUAD	862.RUNX1T1@39784	2.71067	0.00672179
5' CCDC6	FOXK2	THCA	3607.FOXK2@63744	-2.71059	0.00672358
3' NSD1	TCF12	BRCA	6938.TCF12@46228	2.71036	0.00672824
5' ERBB2	FOXG1	BLCA	2290.FOXG1@38827	2.71002	0.00673514
5' RAF1	CBX5	THCA	23468.CBX5@63410	2.70991	0.00673737
3' ABL1	BRD3	LAML	8019.BRD3@44599	-2.70839	0.00676966
5' ERBB2	BDP1	BLCA	55814.BDP1@45889	-2.70826	0.00677086
5' NCOA4	MAX	THCA	4149.MAX@46216	-2.70617	0.00681361
5' EML4	IRF4	LUAD	3662.IRF4@40215	2.70569	0.00682341
5' EML4	TEAD1	LUAD	7003.TEAD1@54612	-2.70326	0.00687348
5' ZDHHC17	SRC	SARC	6714.SRC@6710	-2.70142	0.00691161
3' NSD1	BRD4	BRCA	23476.BRD4@43756	2.70094	0.00692153
5' EGFR	ELF1	LGG	1997.ELF1@49870	2.70061	0.00692855
5' ZDHHC17	T	SARC	6862.T@43972	-2.70042	0.00693237
3' NSD1	NBN	BRCA	4683.NBN@62658	2.69746	0.0069944
5' ERBB2	ARNT2	BRCA	9915.ARNT2@42707	-2.69562	0.00703306
5' ERBB2	IRF2	BRCA	3660.IRF2@33542	2.6954	0.00703765
5' RAF1	YY1	THCA	7528.YY1@62485	2.69454	0.00705581
5' EML4	MYC	LUAD	4609.MYC@36844	2.69406	0.0070661
5' CCDC6	CBX2	THCA	84733.CBX2@57671	2.69383	0.00707099
5' ERG	MITF	PRAD	4286.MITF@42179	-2.69375	0.00707313
5' ERBB2	NPAT	BRCA	4863.NPAT@42775	-2.69333	0.00708155
5' EGFR	SND1	GBM	27044.SND1@1795	2.69276	0.00709364
5' EGFR	BCL3	GBM	602.BCL3@63854	-2.69006	0.00715145
3' RET	IKZF1	THCA	10320.IKZF1@45647	2.68998	0.00715311
5' EGFR	PPARG	GBM	5468.PPARG@50408	2.68919	0.00716997
5' EGFR	ASCL1	GBM	429.ASCL1@49723	2.68764	0.00720338
5' NCOA4	STAT5B	THCA	6777.STAT5B@53635	2.68655	0.00722687
5' ZDHHC17	BRD2	SARC	6046.BRD2@35878	2.68512	0.00725785
5' EML4	CHRM2	LUAD	1129.CHRM2@50107	2.68304	0.00730317
5' NCOA4	ZBTB26	THCA	57684.ZBTB26@65120	2.68262	0.00731233
5' ERBB2	YY1	BRCA	7528.YY1@65203	-2.68168	0.00733272
3' RET	CTCF	THCA	10664.CTCF@8090	2.68045	0.00735985
5' CCDC6	TFDP1	THCA	7027.TFDP1@62551	2.68043	0.00736033
3' RET	GRHL2	THCA	79977.GRHL2@35323	2.68023	0.0073646
5' EGFR	PAF1	GBM	54623.PAF1@36343	-2.67941	0.00738282
5' EGFR	WDR5	LGG	11091.WDR5@58506	2.6788	0.00739623
5' RAF1	DYRK1A	THCA	1859.DYRK1A@52716	2.67717	0.00743215
5' EML4	ZBTB49	LUAD	166793.ZBTB49@64872	-2.67654	0.00744631
5' ANK3	VDR	BRCA	7421.VDR@562	-2.67584	0.00746173
5' CCDC6	C11orf30	THCA	56946.C11orf30@63363	-2.67581	0.00746249
5' ARID1A	TCF7	BRCA	6932.TCF7@64697	-2.67292	0.00752699
5' CPS1	ZNF382	LIHC	84911.ZNF382@64693	-2.67144	0.00756031
3' ABL1	E2F1	LAML	1869.E2F1@41481	-2.67103	0.00757105
5' ZDHHC17	MYH11	SARC	4629.MYH11@37589	2.67029	0.00758611
5' ERBB2	CCDC101	BRCA	112869.CCDC101@1228	2.66892	0.00761728
3' NSD1	HMBOX1	BRCA	79618.HMBOX1@64414	-2.66856	0.00762532
5' ERBB2	ZNF600	BLCA	162966.ZNF600@62555	-2.66688	0.00766349
3' RET	SMC1A	THCA	8243.SMC1A@56557	2.66661	0.00766974
5' ANK3	RFX1	BRCA	5989.RFX1@64988	-2.66401	0.0077292
5' ARID1A	H2AZ	BRCA	3015.H2AZ@35100	-2.66363	0.00773792
5' CCDC6	BHLHE40	THCA	8553.BHLHE40@45807	-2.66353	0.00774034
5' VPS13B	CDK6	BRCA	1021.CDK6@43305	-2.66343	0.00774263
5' TBCD	GLI2	BRCA	2736.GLI2@38718	2.66162	0.00778437
5' CCDC6	RFX2	THCA	5990.RFX2@38761	2.65899	0.00784522
5' EGFR	AR	LGG	367.AR@47333	-2.65793	0.00786986
3' ABL1	BRD4	LAML	23476.BRD4@40022	-2.65781	0.00787427
5' ARID1A	ZSCAN22	BRCA	342945.ZSCAN22@65156	2.65753	0.00787923
5' EGFR	STAT5	LGG	6776.STAT5@55491	2.65583	0.00791913
5' EGFR	ZNF76	LGG	7629.ZNF76@62632	-2.6547	0.00794574
5' ERBB2	NFE2L1	BRCA	4779.NFE2L1@64080	-2.65325	0.00798001
5' TBCD	RBBP5	BRCA	5929.RBBP5@8819	2.65301	0.00798569
5' ERBB2	POLR3D	BRCA	661.POLR3D@41628	-2.65089	0.00803594
5' NF1	GLIS1	SARC	148979.GLIS1@65214	-2.6506	0.00804278
5' ERBB2	CTCFL	BRCA	140690.CTCFL@55771	2.64872	0.00808759
5' ANK3	TARDBP	BRCA	23435.TARDBP@62579	-2.64782	0.00810914
5' RAF1	EZH1	THCA	2145.EZH1@50378	2.64689	0.0081315
5' TBCD	BRD1	BRCA	23774.BRD1@41574	-2.64611	0.00815029
5' VPS13B	NIPBL	BRCA	25836.NIPBL@9320	-2.64573	0.00815948
5' CCDC6	PCGF2	THCA	7703.PCGF2@48355	-2.64298	0.00822607
3' NSD1	ZNF324	BRCA	25799.ZNF324@64444	-2.64183	0.0082539
3' NSD1	NR3C1	BRCA	2908.NR3C1@57915	-2.64017	0.00829447
5' ARID1A	THAP11	BRCA	57215.THAP11@51611	2.63921	0.00831795
5' CCDC6	PSIP1	THCA	11168.PSIP1@51360	2.63863	0.00833217
5' TBCD	ZNF83	BRCA	55769.ZNF83@63118	-2.63664	0.00838112
3' NSD1	H2AFX	BRCA	3014.H2AFX@56132	-2.63537	0.00841263
3' RET	LMNB1	THCA	4001.LMNB1@50122	2.63437	0.00843744
5' EGFR	BCLAF1	GBM	9774.BCLAF1@6958	-2.63376	0.00845259
3' RET	DNMT3B	THCA	1789.DNMT3B@62874	-2.63233	0.00848814
5' TBCD	ZC3H8	BRCA	84524.ZC3H8@63719	2.63198	0.00849694
3' NSD1	STAT5B	BRCA	6777.STAT5B@53629	-2.63178	0.00850194
5' EGFR	KDM1A	LGG	23028.KDM1A@53469	2.63161	0.00850621
5' NF1	ZBTB7A	SARC	51341.ZBTB7A@46102	-2.62891	0.00857415
5' ERBB2	HHEX	BRCA	3087.HHEX@64139	-2.62861	0.00858162
5' CPS1	MAX	LIHC	4149.MAX@46244	-2.62805	0.00859571
5' ANK3	RAD21	BRCA	5885.RAD21@46164	-2.62733	0.00861399
5' NCOA4	ZBTB7A	THCA	51341.ZBTB7A@46102	-2.62657	0.00863321
3' ABL1	LMNB1	LAML	4001.LMNB1@50122	-2.62619	0.00864433
5' ERBB2	ZMIZ1	BRCA	57178.ZMIZ1@45919	-2.62511	0.00867023
5' NF1	SUZ12	SARC	23512.SUZ12@45233	2.62211	0.00874702
5' VPS13B	DYRK1A	BRCA	1859.DYRK1A@52716	2.62191	0.00875212
3' NSD1	ZBTB7A	BRCA	51341.ZBTB7A@46102	-2.62052	0.00878773
5' NF1	AR	SARC	367.AR@56115	-2.61911	0.00882423
5' ERG	ASH2L	PRAD	9070.ASH2L@51333	2.617	0.00887938
3' NSD1	CDX2	BRCA	1045.CDX2@356	2.61697	0.00887971
5' ARID1A	ZNF711	BRCA	7552.ZNF711@2685	2.61553	0.00891711
5' EGFR	SETDB1	LGG	9869.SETDB1@2124	2.6155	0.00891803
5' TBCD	HDAC2	BRCA	3066.HDAC2@62634	-2.61486	0.00893479
5' NF1	KMT2B	SARC	9757.KMT2B@42906	2.61443	0.00894603
5' TBCD	SNAI2	BRCA	6591.SNAI2@48337	-2.6139	0.00895972
5' NF1	ZNF792	SARC	126375.ZNF792@64200	-2.61346	0.0089714
5' ZDHHC17	FOXP2	SARC	93986.FOXP2@46340	-2.6107	0.00904411
3' RET	ZNF146	THCA	7705.ZNF146@64240	-2.60998	0.0090632
3' NSD1	KDM2B	BRCA	84678.KDM2B@58083	-2.60932	0.0090806
5' NF1	EZH2	SARC	2146.EZH2@8663	2.60912	0.00908597
5' RAF1	ATF2	THCA	1386.ATF2@46112	-2.60763	0.00912566
5' TBCD	IRF3	BRCA	3661.IRF3@45609	-2.60721	0.00913662
5' ERG	POLR2B	PRAD	5431.POLR2B@9216	-2.6072	0.00913737
5' CCDC6	FOXO1	THCA	2308.FOXO1@58300	2.60575	0.00917578
5' EGFR	TCF4	LGG	6925.TCF4@9	2.60485	0.0092
5' TBCD	MBD4	BRCA	8930.MBD4@46251	2.604	0.00922272
5' ERBB2	HOXA2	BLCA	3199.HOXA2@38708	-2.60014	0.00932699
5' NCOA4	RELA	THCA	5970.RELA@42744	2.59985	0.00933492
5' RAF1	RUNX1	THCA	861.RUNX1@53305	-2.59952	0.00934383
3' RET	ATOH1	THCA	474.ATOH1@38856	2.59937	0.00934813
5' EML4	CSDE1	LUAD	7812.CSDE1@63484	2.59688	0.00941608
5' VPS13B	SMAD5	BRCA	4090.SMAD5@63097	-2.59606	0.00943858
5' ANK3	TP63	BRCA	8626.TP63@36141	-2.59591	0.0094427
5' TBCD	MAFK	BRCA	7975.MAFK@45815	2.59524	0.00946101
5' ERG	HNF1A	PRAD	6927.HNF1A@64546	2.59505	0.00946683
5' ANK3	DIDO1	BRCA	11083.DIDO1@62904	2.59253	0.00953577
5' ERBB2	ETV4	BLCA	2118.ETV4@64318	2.59214	0.00954662
5' EGFR	IRF4	LGG	3662.IRF4@48632	-2.59148	0.00956498
3' RET	ZBTB26	THCA	57684.ZBTB26@65120	2.59027	0.00959882
5' NCOA4	ETV4	THCA	2118.ETV4@5924	2.58862	0.00964471
5' VPS13B	ING5	BRCA	84289.ING5@41573	-2.58711	0.00968705
5' CPS1	ZNF580	LIHC	51157.ZNF580@64174	2.58685	0.00969445
5' ERBB2	CDK6	BLCA	1021.CDK6@43305	2.5862	0.00971265
5' ARID1A	BRCA1	BRCA	672.BRCA1@45736	-2.58534	0.00973706
5' CCDC6	ZNF239	THCA	8187.ZNF239@63580	-2.58485	0.00975095
5' NCOA4	ZNF217	THCA	7764.ZNF217@45978	-2.58474	0.00975382
3' NSD1	ADNP	BRCA	23394.ADNP@63582	-2.5842	0.00976916
5' EML4	SUZ12	LUAD	23512.SUZ12@38163	-2.58408	0.00977276
5' NCOA4	PKNOX1	THCA	5316.PKNOX1@62762	2.58346	0.00979034
5' TBCD	CREM	BRCA	1390.CREM@64797	2.58287	0.00980688
3' NSD1	ZNF331	BRCA	55422.ZNF331@65193	-2.58183	0.00983646
5' CPS1	HOXB13	LIHC	10481.HOXB13@56668	-2.57939	0.00990629
5' ERBB2	KLF11	BLCA	8462.KLF11@50412	-2.5788	0.00992325
5' NCOA4	ZSCAN20	THCA	7579.ZSCAN20@64441	2.5766	0.00998667
5' TBCD	SF1	BRCA	7536.SF1@33852	-2.57556	0.0100165
3' ABL1	MAX	LAML	4149.MAX@46012	-2.57432	0.0100544
5' EGFR	TEAD1	LGG	7003.TEAD1@48240	2.57366	0.0100716
5' ERBB2	INSM2	BLCA	84684.INSM2@63428	-2.57326	0.0100834
3' NSD1	TDRD3	BRCA	81550.TDRD3@2400	2.57186	0.0101241
5' EGFR	SMC3	GBM	9126.SMC3@45759	2.57028	0.0101707
5' ZDHHC17	PPARD	SARC	5467.PPARD@44351	2.56794	0.0102395
5' NF1	RAD21	SARC	5885.RAD21@63056	-2.5673	0.0102582
5' EML4	MEIS1	LUAD	4211.MEIS1@9322	2.5659	0.0103
5' EML4	GFI1B	LUAD	8328.GFI1B@63598	2.56554	0.0103105
5' VPS13B	KDM5C	BRCA	8242.KDM5C@8781	-2.56506	0.0103248
5' ARID1A	MYBL2	BRCA	4605.MYBL2@46241	2.56442	0.0103439
5' ERBB2	ZNF280D	BRCA	54816.ZNF280D@63619	-2.56339	0.0103745
5' EML4	KLF5	LUAD	688.KLF5@47601	-2.56322	0.0103798
5' CCDC6	ZNF518A	THCA	9849.ZNF518A@62888	-2.5632	0.0103802
5' TBCD	HSF1	BRCA	3297.HSF1@51863	-2.56255	0.0103998
5' EGFR	MEF2C	LGG	4208.MEF2C@46144	-2.56226	0.0104084
5' ANK3	IKZF1	BRCA	10320.IKZF1@64919	2.56127	0.0104381
5' EGFR	ETS2	LGG	2114.ETS2@63992	2.56025	0.0104688
3' NSD1	STAT1	BRCA	6772.STAT1@41290	-2.55763	0.0105479
5' EGFR	KDM2B	LGG	84678.KDM2B@58062	-2.556	0.0105975
5' NCOA4	CREB1	THCA	1385.CREB1@56047	-2.55539	0.0106161
5' ERBB2	INSM2	BRCA	84684.INSM2@63428	2.55528	0.0106192
5' ERBB2	GLI2	BLCA	2736.GLI2@42715	-2.55488	0.0106316
5' TBCD	LMTK3	BRCA	114783.LMTK3@54380	2.55208	0.0107173
3' NSD1	GRHL1	BRCA	29841.GRHL1@42850	2.55082	0.0107563
5' ERG	MEIS1	PRAD	4211.MEIS1@9322	-2.54845	0.0108299
3' NSD1	ERCC6	BRCA	2074.ERCC6@49036	-2.54789	0.0108468
5' NCOA4	MYC	THCA	4609.MYC@45894	2.54671	0.0108836
5' ERBB2	DDX5	BRCA	1655.DDX5@1208	-2.54581	0.0109117
5' CCDC6	EGR2	THCA	1959.EGR2@65179	2.54507	0.0109349
5' ZDHHC17	CBX3	SARC	11335.CBX3@46209	2.54346	0.0109853
3' RET	ZNF574	THCA	64763.ZNF574@65063	-2.54302	0.0109992
5' ARID1A	EHF	BRCA	26298.EHF@50820	2.54299	0.011
5' ZDHHC17	ZNF24	SARC	7572.ZNF24@65031	2.5426	0.0110125
3' ABL1	NR4A1	LAML	3164.NR4A1@62814	2.54265	0.0110127
5' NF1	ZNF83	SARC	55769.ZNF83@42890	2.54238	0.0110194
5' CPS1	GATA2	LIHC	2624.GATA2@58874	-2.5421	0.0110281
5' NCOA4	LHX2	THCA	9355.LHX2@50899	-2.54138	0.0110508
5' EGFR	ERCC3	GBM	2071.ERCC3@41411	2.54133	0.0110525
5' ERG	RARA	PRAD	5914.RARA@2811	-2.53866	0.0111375
5' ANK3	SMARCA5	BRCA	8467.SMARCA5@64777	-2.5377	0.0111677
5' ZDHHC17	ERCC6	SARC	2074.ERCC6@49036	2.53766	0.0111691
3' ABL1	MYB	LAML	4602.MYB@58805	-2.53655	0.0112064
5' ERBB2	ARNT	BRCA	405.ARNT@62868	2.53467	0.0112646
5' ERBB2	TBL1X	BLCA	6907.TBL1X@8564	2.53457	0.0112678
5' EGFR	TBP	GBM	6908.TBP@45684	2.53136	0.0113716
5' EML4	ZNF335	LUAD	63925.ZNF335@63295	2.5311	0.01138
5' EGFR	ZSCAN29	LGG	146050.ZSCAN29@62920	2.5308	0.0113897
5' ERBB2	ZBTB6	BLCA	10773.ZBTB6@65192	-2.52963	0.0114277
5' RAF1	ZNF146	THCA	7705.ZNF146@64241	2.52831	0.0114707
5' ERBB2	PBX3	BRCA	5090.PBX3@46358	-2.52732	0.0115031
5' ERBB2	AR	BRCA	367.AR@56669	2.5269	0.0115168
5' CPS1	JARID2	LIHC	3720.JARID2@41828	2.52579	0.0115535
5' ERBB2	NELFA	BRCA	7469.NELFA@43451	2.52395	0.011614
5' ERBB2	TFDP1	BRCA	7027.TFDP1@38731	-2.52307	0.0116432
3' RET	MAFK	THCA	7975.MAFK@45864	2.52241	0.0116649
5' ERBB2	STAT1	BRCA	6772.STAT1@45904	2.52051	0.0117281
5' CCDC6	POLR2B	THCA	5431.POLR2B@36356	2.51641	0.0118654
5' ZDHHC17	TRIM22	SARC	10346.TRIM22@64620	-2.5143	0.0119365
5' EGFR	MAZ	GBM	4150.MAZ@45867	-2.51404	0.0119454
5' VPS13B	MITF	BRCA	4286.MITF@52548	2.51403	0.0119457
5' ERBB2	RCOR1	BRCA	23186.RCOR1@45777	2.51376	0.0119548
5' NCOA4	TAF1	THCA	6872.TAF1@46106	-2.5136	0.0119604
5' CCDC6	NFE2L2	THCA	4780.NFE2L2@38850	-2.51339	0.0119674
5' EGFR	IRF1	LGG	3659.IRF1@45969	2.51332	0.0119697
5' ZDHHC17	NR2F6	SARC	2063.NR2F6@63771	-2.51326	0.0119719
3' RET	ZNF750	THCA	79755.ZNF750@48799	2.51021	0.0120758
5' EGFR	TRIM22	LGG	10346.TRIM22@64619	2.50985	0.0120879
5' RAF1	ARID3A	THCA	1820.ARID3A@45806	2.50949	0.0121004
5' ARID1A	ZNF554	BRCA	115196.ZNF554@65061	2.50755	0.0121669
5' EGFR	ZEB2	LGG	9839.ZEB2@63282	-2.50671	0.0121957
5' EML4	TFAP2A	LUAD	7020.TFAP2A@56821	-2.50627	0.012211
5' EML4	POLR2B	LUAD	5431.POLR2B@9216	2.50596	0.0122218
5' ARID1A	NFE2L1	BRCA	4779.NFE2L1@63895	-2.50432	0.0122785
5' CPS1	ELF1	LIHC	1997.ELF1@46254	2.5029	0.0123278
3' NSD1	RAG2	BRCA	5897.RAG2@55543	-2.5024	0.0123454
5' VPS13B	ZNF22	BRCA	7570.ZNF22@65178	-2.50049	0.0124119
5' ERBB2	EZH1	BLCA	2145.EZH1@50374	2.49842	0.0124848
3' RET	ZNF92	THCA	168374.ZNF92@49482	2.49713	0.0125303
5' CPS1	MED12	LIHC	9968.MED12@38653	-2.49646	0.0125538
5' ERBB2	NPAT	BLCA	4863.NPAT@38645	2.49631	0.0125593
5' ERG	MAZ	PRAD	4150.MAZ@45924	2.49617	0.0125646
5' VPS13B	ZEB2	BRCA	9839.ZEB2@62509	-2.49564	0.0125829
3' RET	NFE2L1	THCA	4779.NFE2L1@64080	-2.49025	0.0127755
5' ANK3	SCRT1	BRCA	83482.SCRT1@64013	-2.48832	0.0128448
5' ERBB2	FOXP2	BLCA	93986.FOXP2@46340	-2.48801	0.012856
5' RAF1	NFATC1	THCA	4772.NFATC1@38742	2.48746	0.0128759
5' CCDC6	NPAT	THCA	4863.NPAT@42775	-2.48561	0.0129432
5' CPS1	UBTF	LIHC	7343.UBTF@64087	2.48439	0.0129875
5' EGFR	JMJD6	GBM	23210.JMJD6@43064	-2.48258	0.0130536
5' ERG	SNAI2	PRAD	6591.SNAI2@48343	2.48251	0.0130568
5' TBCD	ZNF92	BRCA	168374.ZNF92@49482	2.48207	0.0130721
5' EGFR	JMJD6	LGG	23210.JMJD6@43064	-2.48199	0.013075
5' ERBB2	NFYA	BRCA	4800.NFYA@2094	2.48145	0.0130951
5' CPS1	RELA	LIHC	5970.RELA@45668	2.48077	0.0131201
5' NCOA4	NFYB	THCA	4801.NFYB@2095	2.48031	0.0131371
5' NF1	L3MBTL2	SARC	83746.L3MBTL2@63814	-2.48013	0.0131437
5' RAF1	IRF1	THCA	3659.IRF1@45949	-2.47984	0.0131541
5' EML4	E2F5	LUAD	1875.E2F5@64302	2.47799	0.0132228
5' ARID1A	HCFC1	BRCA	3054.HCFC1@45767	-2.47768	0.0132342
5' CCDC6	ZNF574	THCA	64763.ZNF574@65063	-2.4771	0.0132556
5' VPS13B	KDM1A	BRCA	23028.KDM1A@64822	2.47678	0.0132676
5' VPS13B	E2F4	BRCA	1874.E2F4@45752	2.4765	0.0132779
5' EML4	PRDM12	LUAD	59335.PRDM12@64421	2.4756	0.0133114
5' EML4	ZNF92	LUAD	168374.ZNF92@49482	2.47529	0.0133231
5' ERBB2	SCRT1	BLCA	83482.SCRT1@64013	-2.47525	0.0133246
5' EGFR	HDAC1	LGG	3065.HDAC1@8775	2.47413	0.0133663
5' TBCD	ZNF146	BRCA	7705.ZNF146@64241	2.47409	0.0133678
5' CPS1	EED	LIHC	8726.EED@50371	-2.47404	0.0133696
5' EGFR	TAF1	LGG	6872.TAF1@46345	2.47401	0.0133706
5' TBCD	NFYC	BRCA	4802.NFYC@42774	-2.47387	0.0133759
3' NSD1	OTX2	BRCA	5015.OTX2@51522	-2.47208	0.0134433
5' EGFR	ZNF382	GBM	84911.ZNF382@64693	-2.47159	0.0134616
5' ZDHHC17	H2AZ	SARC	3015.H2AZ@35096	-2.47133	0.0134713
5' RAF1	BRD3	THCA	8019.BRD3@35874	2.47071	0.0134947
5' NF1	NBN	SARC	4683.NBN@63182	2.47016	0.0135156
5' VPS13B	E2F8	BRCA	79733.E2F8@38804	-2.46802	0.0135965
5' ERBB2	ZNF467	BLCA	168544.ZNF467@65062	2.46754	0.0136149
5' ANK3	SF1	BRCA	7536.SF1@33852	-2.46714	0.0136301
3' NSD1	ZBTB17	BRCA	7709.ZBTB17@41831	-2.46703	0.0136341
5' VPS13B	FLI1	BRCA	2313.FLI1@5443	2.46604	0.0136718
5' NCOA4	CIITA	THCA	4261.CIITA@52784	2.46477	0.0137206
5' NF1	EHF	SARC	26298.EHF@50820	-2.4644	0.0137346
3' ABL1	ATF3	LAML	467.ATF3@46133	2.46414	0.0137468
3' NSD1	HINFP	BRCA	25988.HINFP@64045	-2.46381	0.0137571
3' RET	KLF9	THCA	687.KLF9@49949	2.46346	0.0137706
5' CCDC6	ZNF558	THCA	148156.ZNF558@63608	2.46336	0.0137744
5' CCDC6	EZH2	THCA	2146.EZH2@41794	2.46165	0.0138404
5' VPS13B	MAFF	BRCA	23764.MAFF@45801	2.4606	0.0138809
5' ERBB2	ZNF518A	BLCA	9849.ZNF518A@62888	2.45966	0.0139172
5' EGFR	NFIC	LGG	4782.NFIC@46343	2.45898	0.0139438
5' ERG	EP300	PRAD	2033.EP300@56232	-2.45865	0.0139571
5' ERBB2	HNF4G	BRCA	3174.HNF4G@63225	2.45564	0.014074
5' EML4	PAF1	LUAD	54623.PAF1@36344	-2.45469	0.014111
3' RET	ZNF584	THCA	201514.ZNF584@62861	2.45423	0.0141294
5' EGFR	HOXA1	GBM	3198.HOXA1@38817	-2.45295	0.0141798
5' RAF1	RFX5	THCA	5993.RFX5@45730	-2.45231	0.0142048
5' CPS1	RUNX1T1	LIHC	862.RUNX1T1@39784	-2.45173	0.0142278
5' VPS13B	SMAD1	BRCA	4086.SMAD1@51554	2.45067	0.0142696
5' NF1	EED	SARC	8726.EED@50371	2.44951	0.0143157
5' EGFR	CBX3	LGG	11335.CBX3@9230	-2.44843	0.0143584
5' ARID1A	TAF1	BRCA	6872.TAF1@46221	-2.4476	0.0143918
5' ZDHHC17	KDM4C	SARC	23081.KDM4C@43684	-2.44736	0.0144015
5' ERG	USF2	PRAD	7392.USF2@45741	2.44587	0.0144616
5' ERG	KDM4C	PRAD	23081.KDM4C@43684	2.44309	0.0145735
5' ANK3	TBP	BRCA	6908.TBP@45881	2.44295	0.0145783
5' ERBB2	SP4	BRCA	6671.SP4@46179	2.44224	0.0146071
5' TBCD	FOXP1	BRCA	27086.FOXP1@1012	2.44191	0.0146207
5' EGFR	THAP11	GBM	57215.THAP11@51611	2.4407	0.0146697
5' ERBB2	NKX3-1	BLCA	4824.NKX3-1@36252	-2.4402	0.0146897
3' NSD1	SUZ12	BRCA	23512.SUZ12@38163	2.43982	0.0147054
5' VPS13B	HNF1A	BRCA	6927.HNF1A@64546	-2.43935	0.0147245
5' NF1	EZH1	SARC	2145.EZH1@50373	-2.43847	0.0147603
5' ERBB2	HES1	BLCA	3280.HES1@38702	-2.43445	0.0149252
5' CPS1	FOXM1	LIHC	2305.FOXM1@34997	-2.43444	0.0149257
5' TBCD	NOTCH1	BRCA	4851.NOTCH1@393	2.43376	0.0149539
5' EML4	ZNF394	LUAD	84124.ZNF394@62792	-2.43369	0.0149564
5' ARID1A	ZNF382	BRCA	84911.ZNF382@64693	2.43283	0.0149921
5' EML4	BRD2	LUAD	6046.BRD2@43046	2.43172	0.0150384
5' ERBB2	KLF9	BLCA	687.KLF9@62636	2.4303	0.015097
3' NSD1	CIITA	BRCA	4261.CIITA@52784	-2.42978	0.0151188
5' ERG	EZH2	PRAD	2146.EZH2@8663	-2.4297	0.015123
5' EGFR	TLX1	LGG	3195.TLX1@54657	2.42965	0.0151242
5' ARID1A	USP49	BRCA	25862.USP49@39347	2.42962	0.0151256
5' RAF1	STAG1	THCA	10274.STAG1@1493	-2.42928	0.0151396
5' ERBB2	NFATC1	BLCA	4772.NFATC1@38654	-2.42909	0.0151475
3' NSD1	SF1	BRCA	7536.SF1@33852	-2.42647	0.0152575
5' RAF1	RARG	THCA	5916.RARG@49623	-2.42523	0.0153098
5' NF1	HIRA	SARC	7290.HIRA@50178	2.42223	0.0154364
3' NSD1	ZBTB42	BRCA	100128927.ZBTB42@65139	2.42129	0.0154766
5' TBCD	RAD21	BRCA	5885.RAD21@46366	2.42088	0.015494
5' ZDHHC17	ZFX	SARC	7543.ZFX@50077	-2.42002	0.0155305
5' EML4	CTCFL	LUAD	140690.CTCFL@55779	-2.41995	0.0155338
5' ARID1A	EP300	BRCA	2033.EP300@46354	2.41972	0.0155434
5' RAF1	ZSCAN22	THCA	342945.ZSCAN22@65154	2.41936	0.0155588
5' EGFR	ZNF143	LGG	7702.ZNF143@396	2.41685	0.0156665
5' ARID1A	RING1	BRCA	6015.RING1@41489	-2.41664	0.0156756
5' ERG	GLI2	PRAD	2736.GLI2@42715	2.41638	0.0156874
3' ABL1	MBD2	LAML	8932.MBD2@48824	-2.41614	0.0156992
5' EGFR	CEBPB	LGG	1051.CEBPB@64016	2.41545	0.0157269
5' ERBB2	POLR3A	BRCA	11128.POLR3A@45763	2.4147	0.0157592
5' NF1	GATA2	SARC	2624.GATA2@8412	-2.41399	0.0157899
5' EGFR	SMARCA4	GBM	6597.SMARCA4@4543	2.41313	0.0158273
5' ANK3	BRD2	BRCA	6046.BRD2@35878	-2.41168	0.0158903
5' ERBB2	MBD4	BLCA	8930.MBD4@46251	-2.4111	0.0159157
5' ANK3	MAFK	BRCA	7975.MAFK@45815	2.41084	0.0159269
5' VPS13B	PHF6	BRCA	84295.PHF6@44144	-2.41008	0.01596
5' EGFR	JMJD1C	LGG	221037.JMJD1C@57960	-2.40995	0.0159657
3' RET	ZBTB7A	THCA	51341.ZBTB7A@46102	-2.40921	0.0159983
5' NF1	MBD1	SARC	4152.MBD1@63465	-2.40798	0.0160522
3' NSD1	E2F5	BRCA	1875.E2F5@64302	-2.40772	0.0160637
5' EGFR	RYBP	LGG	23429.RYBP@8550	-2.40771	0.0160639
5' RAF1	MEF2D	THCA	4209.MEF2D@64127	-2.40361	0.0162453
5' EGFR	TCF7L1	LGG	83439.TCF7L1@40166	-2.40324	0.0162618
5' CPS1	ZNF335	LIHC	63925.ZNF335@63294	-2.4025	0.0162947
5' TBCD	STAT1	BRCA	6772.STAT1@41291	-2.40239	0.0162995
5' CCDC6	CIITA	THCA	4261.CIITA@52784	2.40192	0.0163204
3' NSD1	KDM5B	BRCA	10765.KDM5B@45390	-2.40086	0.016368
5' EML4	INSM2	LUAD	84684.INSM2@63428	2.40041	0.0163878
5' CPS1	SND1	LIHC	27044.SND1@38173	2.39953	0.0164275
5' ARID1A	SF1	BRCA	7536.SF1@33852	2.39849	0.0164742
5' ZDHHC17	ZNF143	SARC	7702.ZNF143@45629	-2.39779	0.0165057
5' CPS1	BCOR	LIHC	54880.BCOR@64564	2.39532	0.0166175
3' NSD1	BCL6	BRCA	604.BCL6@52303	2.39488	0.016637
5' TBCD	HOXA1	BRCA	3198.HOXA1@38817	2.39376	0.0166879
5' CPS1	NKX3-1	LIHC	4824.NKX3-1@36252	-2.39242	0.0167493
5' NF1	ZNF518A	SARC	9849.ZNF518A@62888	-2.39241	0.0167495
3' NSD1	KDM4C	BRCA	23081.KDM4C@43684	2.39218	0.01676
5' ERG	RELA	PRAD	5970.RELA@45670	-2.39135	0.0167987
3' NSD1	ZNF680	BRCA	340252.ZNF680@65208	2.39132	0.0167992
5' VPS13B	FOXD2	BRCA	2306.FOXD2@38635	-2.39023	0.0168493
3' ABL1	MAZ	LAML	4150.MAZ@65115	2.38967	0.016877
5' CCDC6	DNMT3B	THCA	1789.DNMT3B@62874	-2.3884	0.0169332
5' ERG	MTA3	PRAD	57504.MTA3@46147	-2.3882	0.0169434
5' VPS13B	NFRKB	BRCA	4798.NFRKB@64144	2.38815	0.0169447
5' EGFR	USF1	LGG	7391.USF1@46205	-2.38721	0.0169882
5' RAF1	THAP11	THCA	57215.THAP11@51612	2.38701	0.0169973
5' CPS1	SP2	LIHC	6668.SP2@65084	-2.38648	0.017022
5' VPS13B	SND1	BRCA	27044.SND1@38173	-2.38525	0.0170791
5' ERBB2	ZNF687	BRCA	57592.ZNF687@64786	-2.38492	0.0170943
5' ANK3	ARRB1	BRCA	408.ARRB1@50162	2.38451	0.0171136
5' EGFR	SIN3A	LGG	25942.SIN3A@46360	2.38295	0.0171859
5' TBCD	ING2	BRCA	3622.ING2@41572	2.38102	0.0172763
5' NCOA4	BRD4	THCA	23476.BRD4@43109	-2.38041	0.017305
5' ERBB2	SF1	BLCA	7536.SF1@33852	2.37839	0.0174002
5' NF1	CIITA	SARC	4261.CIITA@52784	-2.37765	0.0174348
5' TBCD	MAF	BRCA	4094.MAF@58809	-2.3762	0.0175037
5' ERG	RNF2	PRAD	6045.RNF2@41490	-2.37575	0.0175254
5' ANK3	ELK4	BRCA	2005.ELK4@45724	-2.37513	0.0175543
5' CPS1	CDK8	LIHC	1024.CDK8@56353	2.37427	0.0175953
5' RAF1	RING1	THCA	6015.RING1@41489	2.37346	0.0176338
5' ARID1A	GMEB1	BRCA	10691.GMEB1@38799	-2.37341	0.0176362
5' EML4	CEBPB	LUAD	1051.CEBPB@46206	2.37327	0.0176431
5' EGFR	HINFP	LGG	25988.HINFP@64045	-2.37318	0.0176475
5' CCDC6	PROX1	THCA	5629.PROX1@49669	2.37237	0.017686
5' ERBB2	TRIM24	BLCA	8805.TRIM24@64948	2.37166	0.01772
5' ERBB2	DDX21	BLCA	9188.DDX21@50210	-2.36859	0.0178678
5' ANK3	TCF7L1	BRCA	83439.TCF7L1@40166	2.36844	0.0178748
5' ANK3	CBX8	BRCA	57332.CBX8@43569	-2.36734	0.017928
3' ABL1	WDR5	LAML	11091.WDR5@33917	2.36701	0.0179467
5' ZDHHC17	RAG2	SARC	5897.RAG2@55543	2.36648	0.0179701
5' ERBB2	SP1	BRCA	6667.SP1@5395	-2.36592	0.0179971
5' TBCD	CDK6	BRCA	1021.CDK6@43305	-2.36555	0.018015
5' NF1	KLF9	SARC	687.KLF9@49949	2.36433	0.0180744
5' EGFR	ZNF83	LGG	55769.ZNF83@63118	-2.36422	0.0180799
5' NCOA4	SOX9	THCA	6662.SOX9@53493	2.36379	0.0181008
5' EGFR	KDM5C	LGG	8242.KDM5C@58886	-2.36276	0.0181511
5' EML4	GATA2	LUAD	2624.GATA2@46032	-2.36197	0.0181899
5' EML4	RCOR1	LUAD	23186.RCOR1@45903	-2.36189	0.018194
5' EGFR	ETS1	LGG	2113.ETS1@37945	2.35983	0.018295
5' CCDC6	NELFE	THCA	7936.NELFE@53324	-2.3582	0.0183758
5' RAF1	ZNF140	THCA	7699.ZNF140@65113	2.35568	0.0185006
5' ZDHHC17	GATAD1	SARC	57798.GATAD1@1219	2.35516	0.0185269
5' ERBB2	CHD1	BLCA	1105.CHD1@36348	2.35495	0.018537
5' ERG	T	PRAD	6862.T@43972	2.35475	0.0185476
3' RET	KDM5A	THCA	5927.KDM5A@8812	-2.35374	0.0185978
3' NSD1	ZNF697	BRCA	90874.ZNF697@63011	2.35193	0.0186885
5' ERG	KDM2B	PRAD	84678.KDM2B@58062	-2.3516	0.0187053
3' NSD1	CTCF	BRCA	10664.CTCF@46063	2.35003	0.018784
5' CPS1	CHD2	LIHC	1106.CHD2@45764	2.34988	0.0187915
5' ANK3	HINFP	BRCA	25988.HINFP@64045	-2.3493	0.0188208
5' NF1	ZNF143	SARC	7702.ZNF143@45946	2.34789	0.0188924
5' ZDHHC17	INSM2	SARC	84684.INSM2@63428	2.34685	0.0189449
5' ERBB2	JARID2	BRCA	3720.JARID2@41824	2.34207	0.0191893
5' CCDC6	TCF21	THCA	6943.TCF21@52495	2.33974	0.0193092
5' ARID1A	YBX3	BRCA	8531.YBX3@63935	-2.33868	0.0193643
5' ARID1A	KMT2B	BRCA	9757.KMT2B@42906	-2.33814	0.0193922
3' RET	ZEB2	THCA	9839.ZEB2@63282	-2.33712	0.0194454
5' ZDHHC17	SMAD4	SARC	4089.SMAD4@1087	-2.33654	0.0194753
5' ERBB2	ZBTB11	BLCA	27107.ZBTB11@64290	2.33634	0.0194858
3' RET	NPAT	THCA	4863.NPAT@42775	-2.33478	0.0195674
5' ERG	H2AZ	PRAD	3015.H2AZ@45483	-2.33354	0.0196326
5' ARID1A	NR2C2	BRCA	7182.NR2C2@45653	-2.33312	0.019654
5' NF1	ZNF324	SARC	25799.ZNF324@65144	-2.33091	0.0197702
3' RET	ZNF143	THCA	7702.ZNF143@64895	-2.32963	0.019838
5' CCDC6	ZMIZ1	THCA	57178.ZMIZ1@64816	2.32873	0.0198856
3' RET	GTF3C2	THCA	2976.GTF3C2@45756	-2.32246	0.0202205
5' NCOA4	NR5A2	THCA	2494.NR5A2@33220	2.32234	0.0202273
5' VPS13B	BRD3	BRCA	8019.BRD3@44598	-2.3222	0.0202344
5' ARID1A	CDK12	BRCA	51755.CDK12@56010	-2.32218	0.0202355
5' ZDHHC17	MCM7	SARC	4176.MCM7@63846	2.32085	0.0203075
5' EGFR	HDAC2	GBM	3066.HDAC2@8659	2.32061	0.0203204
5' TBCD	FOS	BRCA	2353.FOS@45959	2.3204	0.0203319
5' CPS1	T	LIHC	6862.T@53302	2.32016	0.0203447
5' EML4	BCLAF1	LUAD	9774.BCLAF1@46288	2.3193	0.020391
5' ERG	SCRT1	PRAD	83482.SCRT1@64012	-2.31863	0.020428
5' TBCD	TAF7	BRCA	6879.TAF7@46195	-2.31804	0.0204599
5' ARID1A	EZH2	BRCA	2146.EZH2@41788	-2.31789	0.0204679
5' ZDHHC17	CEBPD	SARC	1052.CEBPD@46294	-2.31728	0.020501
3' ABL1	SNAI2	LAML	6591.SNAI2@48337	-2.31653	0.0205444
5' CCDC6	GTF2I	THCA	2969.GTF2I@50698	2.31585	0.0205791
5' ZDHHC17	NR3C1	SARC	2908.NR3C1@57915	2.31568	0.020588
5' ERG	HES2	PRAD	54626.HES2@64242	2.3151	0.0206206
3' ABL1	MED12	LAML	9968.MED12@38653	2.31501	0.0206275
5' ZDHHC17	BCL11B	SARC	64919.BCL11B@64463	-2.31481	0.0206356
5' ZDHHC17	RING1	SARC	6015.RING1@41489	-2.31405	0.0206773
5' TBCD	GATA4	BRCA	2626.GATA4@51466	2.3113	0.0208289
5' ARID1A	PPARG	BRCA	5468.PPARG@55129	-2.31104	0.0208434
5' EGFR	FOXP1	GBM	27086.FOXP1@51750	2.3097	0.0209173
5' ARID1A	SAP30	BRCA	8819.SAP30@8800	2.3094	0.020934
5' EGFR	JARID2	LGG	3720.JARID2@41793	-2.30919	0.0209459
5' VPS13B	SMARCA5	BRCA	8467.SMARCA5@64777	-2.30837	0.0209913
5' CPS1	E2F4	LIHC	1874.E2F4@46000	-2.30619	0.0211125
3' NSD1	HDGF	BRCA	3068.HDGF@62954	-2.30529	0.021163
5' ERBB2	DEK	BLCA	7913.DEK@49697	-2.30412	0.0212285
3' NSD1	PBX2	BRCA	5089.PBX2@64082	-2.304	0.0212351
5' RAF1	KLF13	THCA	51621.KLF13@64021	2.30206	0.0213445
5' ZDHHC17	HDGF	SARC	3068.HDGF@62954	2.30195	0.0213508
5' NF1	SUPT5H	SARC	6829.SUPT5H@53325	-2.30013	0.0214535
3' ABL1	ARNT	LAML	405.ARNT@62869	-2.29985	0.021472
5' EGFR	KDM1A	GBM	23028.KDM1A@53469	-2.29935	0.0214981
5' EGFR	TFAP2C	LGG	7022.TFAP2C@9509	-2.29934	0.0214982
5' CCDC6	ETV7	THCA	51513.ETV7@38647	-2.29919	0.0215069
5' EML4	STAT5B	LUAD	6777.STAT5B@53628	2.29861	0.0215399
5' CPS1	NR5A2	LIHC	2494.NR5A2@33220	2.29829	0.0215583
5' ZDHHC17	DAXX	SARC	1616.DAXX@54104	-2.29584	0.0216979
5' ARID1A	ZSCAN5A	BRCA	79149.ZSCAN5A@63377	-2.29496	0.0217481
3' NSD1	ZMIZ1	BRCA	57178.ZMIZ1@45919	-2.29478	0.0217587
5' EGFR	SUPT5H	LGG	6829.SUPT5H@43450	-2.29436	0.0217828
5' RAF1	E2F5	THCA	1875.E2F5@64302	2.29373	0.0218191
3' ABL1	ELF2	LAML	1998.ELF2@38739	-2.29365	0.021826
5' ERBB2	GLIS1	BLCA	148979.GLIS1@65214	-2.29314	0.0218526
3' NSD1	ERCC3	BRCA	2071.ERCC3@41411	2.29275	0.021875
5' ANK3	RNF2	BRCA	6045.RNF2@41490	-2.29203	0.0219168
3' RET	ZBTB40	THCA	9923.ZBTB40@62937	2.29176	0.0219326
5' ERG	RXRG	PRAD	6258.RXRG@4515	2.29089	0.0219835
5' ARID1A	EPAS1	BRCA	2034.EPAS1@47088	2.29028	0.022018
5' ARID1A	EGR1	BRCA	1958.EGR1@46298	-2.28979	0.0220462
5' ANK3	NFE2L2	BRCA	4780.NFE2L2@64298	-2.2873	0.0221915
5' ZDHHC17	RXRG	SARC	6258.RXRG@4515	2.2867	0.0222264
5' ANK3	KLF9	BRCA	687.KLF9@62636	2.28617	0.022257
5' RAF1	BRD4	THCA	23476.BRD4@36299	2.28432	0.0223657
5' ARID1A	ERCC2	BRCA	2068.ERCC2@41412	-2.28386	0.0223929
5' EGFR	KDM5C	GBM	8242.KDM5C@58887	-2.28372	0.0224009
5' EML4	BRCA1	LUAD	672.BRCA1@44028	2.28344	0.0224175
5' ERBB2	RELA	BLCA	5970.RELA@42744	-2.28313	0.0224359
5' EML4	MED1	LUAD	5469.MED1@58492	-2.28312	0.0224366
5' ARID1A	MEF2A	BRCA	4205.MEF2A@46283	2.28178	0.0225152
3' RET	LYL1	THCA	4066.LYL1@59002	-2.28175	0.0225171
5' NCOA4	PBX1	THCA	5087.PBX1@51248	-2.28109	0.0225561
5' EGFR	CIITA	LGG	4261.CIITA@52788	2.28081	0.0225729
5' ERBB2	GLYR1	BLCA	84656.GLYR1@1225	2.28068	0.0225806
5' ERBB2	KDM5B	BLCA	10765.KDM5B@45390	-2.27968	0.0226399
5' CCDC6	TAF7	THCA	6879.TAF7@64178	-2.27939	0.0226568
3' RET	TCF21	THCA	6943.TCF21@52495	2.27755	0.0227663
5' ERBB2	SMAD3	BLCA	4088.SMAD3@1085	2.27641	0.0228346
3' ABL1	KAT8	LAML	84148.KAT8@62660	-2.27544	0.0228955
5' CCDC6	MTA2	THCA	9219.MTA2@63212	2.27488	0.0229265
5' ARID1A	FOXK1	BRCA	221937.FOXK1@9506	2.27367	0.0229991
5' ARID1A	PGR	BRCA	5241.PGR@54240	-2.27095	0.0231632
5' RAF1	ETV5	THCA	2119.ETV5@42714	-2.27026	0.0232052
5' CCDC6	L3MBTL2	THCA	83746.L3MBTL2@63813	-2.26977	0.023235
3' RET	RAD51	THCA	5888.RAD51@63793	2.26863	0.0233039
3' RET	ASH2L	THCA	9070.ASH2L@51333	-2.2678	0.0233544
5' ERBB2	SIN3A	BRCA	25942.SIN3A@46277	-2.26738	0.0233803
5' CCDC6	LMNA	THCA	4000.LMNA@34444	-2.26658	0.023429
5' ZDHHC17	ELK4	SARC	2005.ELK4@45755	-2.26541	0.023501
5' NCOA4	SMAD3	THCA	4088.SMAD3@47576	-2.26537	0.0235034
5' CPS1	KMT2A	LIHC	4297.KMT2A@59165	2.26519	0.0235145
5' VPS13B	ZMYM3	BRCA	9203.ZMYM3@62709	-2.2644	0.0235628
5' ERBB2	TAL1	BRCA	6886.TAL1@47077	2.2643	0.0235687
5' EGFR	RELA	LGG	5970.RELA@4961	-2.26407	0.0235828
3' NSD1	ZNF394	BRCA	84124.ZNF394@62792	-2.26062	0.0237962
5' ARID1A	PAX5	BRCA	5079.PAX5@34467	2.26043	0.023808
5' ERG	GLIS2	PRAD	84662.GLIS2@63826	2.26033	0.023815
5' ERBB2	ZNF563	BRCA	147837.ZNF563@65216	2.25956	0.0238618
3' ABL1	MAFK	LAML	7975.MAFK@42854	-2.25886	0.0239081
5' EGFR	NFATC1	LGG	4772.NFATC1@46110	2.25678	0.0240351
5' ZDHHC17	HOXB13	SARC	10481.HOXB13@56668	-2.25474	0.0241627
5' VPS13B	MAZ	BRCA	4150.MAZ@45661	2.25459	0.0241727
5' TBCD	DLX1	BRCA	1745.DLX1@38719	-2.25433	0.0241887
5' ZDHHC17	GMEB1	SARC	10691.GMEB1@38799	-2.2543	0.0241909
5' ERBB2	GATA3	BRCA	2625.GATA3@46361	-2.25353	0.0242392
5' ARID1A	ETS2	BRCA	2114.ETS2@38712	2.2523	0.024317
5' RAF1	FOXH1	THCA	8928.FOXH1@1010	2.25215	0.0243263
5' CCDC6	CDK9	THCA	1025.CDK9@53346	-2.24993	0.0244667
5' ERBB2	MECP2	BLCA	4204.MECP2@34399	-2.24971	0.0244808
5' ANK3	SIX5	BRCA	147912.SIX5@46054	2.24856	0.0245542
5' CPS1	NFATC1	LIHC	4772.NFATC1@38654	2.24847	0.0245598
5' ZDHHC17	TCF12	SARC	6938.TCF12@46120	2.24781	0.024602
5' ERBB2	ELK1	BRCA	2002.ELK1@45729	-2.24702	0.0246522
5' ANK3	ELF5	BRCA	2001.ELF5@33467	2.24626	0.0247006
5' NCOA4	ZNF750	THCA	79755.ZNF750@48799	2.24609	0.0247119
5' CCDC6	SMAD5	THCA	4090.SMAD5@63097	2.24567	0.0247388
5' ZDHHC17	E2F2	SARC	1870.E2F2@38865	2.24523	0.024767
3' NSD1	GTF2B	BRCA	2959.GTF2B@56961	2.24445	0.0248172
5' RAF1	UBTF	THCA	7343.UBTF@45961	2.24403	0.0248443
3' RET	HDAC3	THCA	8841.HDAC3@8661	2.24295	0.0249135
5' EGFR	TP53	GBM	7157.TP53@6548	-2.24235	0.0249525
5' ANK3	HDGF	BRCA	3068.HDGF@62849	2.24105	0.0250364
3' RET	T	THCA	6862.T@43972	-2.24073	0.0250575
3' ABL1	NELFE	LAML	7936.NELFE@53324	-2.24052	0.0250731
5' VPS13B	LARP7	BRCA	51574.LARP7@63202	2.24028	0.0250863
5' VPS13B	LMNB1	BRCA	4001.LMNB1@50122	2.23992	0.0251096
5' CPS1	KDM4A	LIHC	9682.KDM4A@45228	-2.23899	0.0251701
3' RET	SCRT1	THCA	83482.SCRT1@64012	-2.23847	0.0252041
5' EGFR	SIX5	LGG	147912.SIX5@46188	2.23622	0.0253512
3' NSD1	GLIS2	BRCA	84662.GLIS2@63825	2.23602	0.0253639
5' ERBB2	E2F3	BRCA	1871.E2F3@42712	2.23479	0.025445
3' NSD1	PTRF	BRCA	284119.PTRF@62802	-2.2339	0.0255031
5' ERBB2	DCP1A	BLCA	55802.DCP1A@36226	2.2337	0.0255165
5' ZDHHC17	ZNF35	SARC	7584.ZNF35@65180	-2.23343	0.0255343
3' RET	ZSCAN20	THCA	7579.ZSCAN20@64441	2.23154	0.0256588
5' ERG	AFF1	PRAD	4299.AFF1@34966	2.23143	0.0256674
3' RET	HNF4A	THCA	3172.HNF4A@371	-2.23046	0.0257308
5' NF1	STAT1	SARC	6772.STAT1@41287	-2.23006	0.0257569
5' TBCD	GATA1	BRCA	2623.GATA1@8458	-2.22951	0.0257935
3' RET	SF1	THCA	7536.SF1@33852	-2.22944	0.0257985
5' EGFR	AFF4	LGG	27125.AFF4@48995	-2.22924	0.0258115
3' RET	DIDO1	THCA	11083.DIDO1@62905	2.22732	0.02594
5' ARID1A	PRDM12	BRCA	59335.PRDM12@64421	2.22665	0.0259847
5' EGFR	PBX3	GBM	5090.PBX3@56901	-2.22631	0.0260071
5' CPS1	CDK6	LIHC	1021.CDK6@43305	2.22616	0.0260172
5' EGFR	ZNF697	LGG	90874.ZNF697@63010	2.22557	0.026057
5' CCDC6	DIDO1	THCA	11083.DIDO1@62905	2.22475	0.0261118
5' ANK3	ETS2	BRCA	2114.ETS2@38712	-2.22366	0.0261849
5' VPS13B	FOXO1	BRCA	2308.FOXO1@58300	2.22352	0.0261944
5' ZDHHC17	ZNF528	SARC	84436.ZNF528@65160	2.22351	0.026195
5' NF1	ASCL2	SARC	430.ASCL2@38812	2.22287	0.0262381
5' ERBB2	XRN2	BRCA	22803.XRN2@58841	-2.22173	0.0263153
5' ERBB2	SMARCC1	BRCA	6599.SMARCC1@1346	2.22001	0.0264316
5' TBCD	WDR5	BRCA	11091.WDR5@33917	2.21939	0.0264739
5' EGFR	CDX2	GBM	1045.CDX2@356	-2.21845	0.0265379
5' EML4	JUN	LUAD	3725.JUN@42727	2.21819	0.0265559
5' NCOA4	ZFP64	THCA	55734.ZFP64@65123	-2.21803	0.0265664
5' NF1	KLF17	SARC	128209.KLF17@62617	-2.21764	0.0265932
5' NCOA4	SIN3A	THCA	25942.SIN3A@63655	-2.21642	0.0266767
5' ANK3	HMGN3	BRCA	9324.HMGN3@45920	2.21486	0.0267837
5' NF1	ARID3A	SARC	1820.ARID3A@45806	2.21452	0.0268069
5' ARID1A	GTF2E2	BRCA	2961.GTF2E2@63822	2.21428	0.0268233
3' NSD1	ELF1	BRCA	1997.ELF1@46323	-2.21337	0.0268863
5' ZDHHC17	ZNF48	SARC	197407.ZNF48@63763	2.21302	0.0269103
5' RAF1	SMARCB1	THCA	6598.SMARCB1@1345	2.21203	0.0269785
3' ABL1	ZNF76	LAML	7629.ZNF76@62632	2.20528	0.0274512
5' VPS13B	SNAI2	BRCA	6591.SNAI2@48339	2.20434	0.0275143
5' NCOA4	FOXA2	THCA	3170.FOXA2@46227	2.20404	0.0275356
5' ZDHHC17	ZBTB33	SARC	10009.ZBTB33@63843	2.20379	0.027553
3' RET	HES2	THCA	54626.HES2@64242	-2.2033	0.0275875
5' EML4	ETV7	LUAD	51513.ETV7@38647	2.20305	0.0276057
5' ERG	BRD1	PRAD	23774.BRD1@41574	-2.20266	0.0276333
5' RAF1	BACH1	THCA	571.BACH1@64378	-2.20237	0.027653
5' VPS13B	FOSL1	BRCA	8061.FOSL1@46212	-2.20163	0.0277053
5' ARID1A	ZNF467	BRCA	168544.ZNF467@65062	2.20077	0.0277666
5' EGFR	GATA1	GBM	2623.GATA1@8409	-2.20012	0.027813
5' CCDC6	ZNF600	THCA	162966.ZNF600@62555	-2.19923	0.0278756
3' ABL1	MYH11	LAML	4629.MYH11@37625	2.19899	0.0278953
5' EGFR	GTF2I	GBM	2969.GTF2I@50709	2.1982	0.0279492
5' ERBB2	WRNIP1	BLCA	56897.WRNIP1@45630	2.19685	0.0280451
5' EML4	KLF11	LUAD	8462.KLF11@50415	2.19665	0.0280596
3' NSD1	ING5	BRCA	84289.ING5@41573	-2.19522	0.0281618
5' VPS13B	EGR2	BRCA	1959.EGR2@65179	-2.19492	0.0281834
5' ERG	ELK1	PRAD	2002.ELK1@63321	-2.19261	0.0283506
5' EGFR	RARA	GBM	5914.RARA@49620	-2.19252	0.0283566
5' EML4	RAG2	LUAD	5897.RAG2@55543	2.19228	0.0283738
5' EML4	JMJD1C	LUAD	221037.JMJD1C@59001	-2.19127	0.0284469
5' NCOA4	ETS2	THCA	2114.ETS2@38712	2.18986	0.0285485
5' NCOA4	TP53	THCA	7157.TP53@50361	2.18927	0.0285914
5' RAF1	HEY1	THCA	23462.HEY1@7341	2.18871	0.0286319
5' EGFR	SETD1A	LGG	9739.SETD1A@59170	-2.18804	0.0286809
5' ERG	MECOM	PRAD	2122.MECOM@38858	2.1879	0.0286923
3' NSD1	GRHL2	BRCA	79977.GRHL2@35323	2.18759	0.0287141
5' ERBB2	ZNF382	BRCA	84911.ZNF382@64693	-2.18694	0.0287611
5' ANK3	MLLT1	BRCA	4298.MLLT1@59168	-2.18671	0.0287779
5' TBCD	POLR2B	BRCA	5431.POLR2B@9216	-2.18636	0.0288036
5' ZDHHC17	MYB	SARC	4602.MYB@58805	-2.18485	0.0289142
5' ARID1A	ETV1	BRCA	2115.ETV1@534	2.18423	0.0289598
5' ZDHHC17	POLR3A	SARC	11128.POLR3A@45763	2.18327	0.0290305
3' ABL1	KDM1A	LAML	23028.KDM1A@53467	-2.18321	0.0290378
5' ARID1A	CHD1	BRCA	1105.CHD1@45237	-2.18304	0.0290473
5' VPS13B	NR2F1	BRCA	7025.NR2F1@56817	-2.18301	0.0290498
5' VPS13B	ERCC3	BRCA	2071.ERCC3@41411	2.18255	0.0290833
5' TBCD	ZXDB	BRCA	158586.ZXDB@63902	2.18239	0.0290949
5' ERG	CHD1	PRAD	1105.CHD1@36348	2.18189	0.0291329
5' EGFR	RAG2	LGG	5897.RAG2@55543	-2.18126	0.0291788
5' EGFR	NFRKB	GBM	4798.NFRKB@64143	-2.18049	0.0292354
5' ANK3	ZNF143	BRCA	7702.ZNF143@45629	2.17814	0.0294098
5' EGFR	MAFG	GBM	4097.MAFG@64576	-2.1776	0.0294506
3' ABL1	PRDM6	LAML	93166.PRDM6@65125	-2.17751	0.0294595
5' ANK3	ZSCAN22	BRCA	342945.ZSCAN22@65154	2.17715	0.0294835
3' RET	MAFB	THCA	9935.MAFB@50112	2.17458	0.0296763
3' ABL1	NR2F6	LAML	2063.NR2F6@63771	-2.17421	0.0297071
3' ABL1	H2AFZ	LAML	3015.H2AFZ@64689	-2.17119	0.0299346
5' ERG	LHX2	PRAD	9355.LHX2@38679	2.17068	0.0299704
3' NSD1	ZNF263	BRCA	10127.ZNF263@45958	2.17063	0.0299733
5' EGFR	NRF1	LGG	4899.NRF1@46034	-2.17058	0.0299773
5' VPS13B	HEY1	BRCA	23462.HEY1@7527	-2.17058	0.0299776
5' ZDHHC17	NFAT5	SARC	10725.NFAT5@38773	-2.17044	0.0299883
5' ERBB2	C11orf30	BLCA	56946.C11orf30@63363	-2.17034	0.0299954
5' ZDHHC17	NIPBL	SARC	25836.NIPBL@50516	2.16955	0.0300556
5' ZDHHC17	BHLHE40	SARC	8553.BHLHE40@45916	-2.16948	0.0300605
5' NF1	ZNF335	SARC	63925.ZNF335@63295	-2.16935	0.0300705
5' ERG	MYB	PRAD	4602.MYB@50569	-2.16879	0.0301138
5' ERBB2	MYH11	BLCA	4629.MYH11@37625	2.16698	0.0302511
5' EGFR	ZMYM3	GBM	9203.ZMYM3@64656	-2.16668	0.0302737
3' NSD1	TFAP2A	BRCA	7020.TFAP2A@45753	-2.16636	0.0302983
5' CCDC6	HNF4A	THCA	3172.HNF4A@371	-2.16623	0.0303086
5' NF1	LMNB1	SARC	4001.LMNB1@50122	2.16593	0.0303309
5' VPS13B	ZNF101	BRCA	94039.ZNF101@63634	-2.16473	0.0304226
5' ERG	JUN	PRAD	3725.JUN@45892	2.16396	0.0304826
5' ARID1A	MITF	BRCA	4286.MITF@42178	2.16332	0.0305314
3' RET	JMJD1C	THCA	221037.JMJD1C@59006	2.16299	0.0305569
5' EML4	KAT2B	LUAD	8850.KAT2B@4418	2.16287	0.030566
5' ERBB2	KLF8	BRCA	11279.KLF8@64091	-2.16185	0.0306445
3' NSD1	STAT5	BRCA	6776.STAT5@44084	-2.16132	0.0306854
5' ERG	BRD2	PRAD	6046.BRD2@35878	2.16084	0.0307233
5' RAF1	ZSCAN5A	THCA	79149.ZSCAN5A@63376	-2.16048	0.0307503
5' ANK3	EGR2	BRCA	1959.EGR2@65179	-2.15991	0.0307945
5' EGFR	HEY1	LGG	23462.HEY1@7341	-2.15969	0.0308111
5' VPS13B	CBX3	BRCA	11335.CBX3@46209	-2.15964	0.0308154
5' ERBB2	LIN9	BLCA	286826.LIN9@5888	2.15919	0.0308502
5' NCOA4	DCP1A	THCA	55802.DCP1A@36231	-2.15872	0.0308864
5' VPS13B	CBX8	BRCA	57332.CBX8@43558	-2.15867	0.0308909
3' NSD1	SMARCB1	BRCA	6598.SMARCB1@45779	-2.15825	0.0309234
5' EGFR	BACH1	GBM	571.BACH1@64378	2.15744	0.030986
3' NSD1	ZNF335	BRCA	63925.ZNF335@63294	2.15655	0.0310554
5' EML4	HEY1	LUAD	23462.HEY1@7341	2.15571	0.0311212
5' TBCD	DROSHA	BRCA	29102.DROSHA@63270	-2.15565	0.0311256
5' RAF1	ZNF391	THCA	346157.ZNF391@62985	-2.15475	0.0311959
5' ZDHHC17	NFE2	SARC	4778.NFE2@39357	-2.15391	0.0312618
5' CCDC6	AFF1	THCA	4299.AFF1@34966	2.15335	0.031306
5' ARID1A	ZNF16	BRCA	7564.ZNF16@62681	2.15333	0.0313076
3' ABL1	ELL2	LAML	22936.ELL2@49008	2.15333	0.0313106
5' CPS1	ETV5	LIHC	2119.ETV5@42714	-2.15313	0.031323
5' ARID1A	PAF1	BRCA	54623.PAF1@55666	2.15268	0.0313589
5' EML4	ZNF280D	LUAD	54816.ZNF280D@63619	-2.1523	0.0313883
5' TBCD	SP4	BRCA	6671.SP4@46179	2.15228	0.0313904
3' RET	KLF1	THCA	10661.KLF1@39350	-2.15133	0.0314653
5' CCDC6	ZBTB11	THCA	27107.ZBTB11@64750	2.15132	0.0314656
5' ERBB2	ZFP64	BRCA	55734.ZFP64@63982	-2.15089	0.0315
5' ERG	PPARG	PRAD	5468.PPARG@5882	-2.15056	0.0315263
5' EML4	ZBTB17	LUAD	7709.ZBTB17@64074	-2.15055	0.0315268
3' RET	CBX2	THCA	84733.CBX2@57671	2.15026	0.0315494
5' NF1	HDAC1	SARC	3065.HDAC1@8775	2.14922	0.0316317
5' ERBB2	JUNB	BRCA	3726.JUNB@7487	-2.14859	0.0316815
5' CPS1	ZNF414	LIHC	84330.ZNF414@63766	2.14767	0.0317548
5' RAF1	TBX21	THCA	30009.TBX21@33678	-2.14691	0.0318156
3' NSD1	TEAD2	BRCA	8463.TEAD2@64089	2.14644	0.0318526
5' CPS1	PAF1	LIHC	54623.PAF1@55666	-2.14626	0.0318671
5' EGFR	ELK3	LGG	2004.ELK3@50434	-2.14573	0.0319095
5' ZDHHC17	PRAME	SARC	23532.PRAME@2110	2.14489	0.0319763
5' TBCD	PPARG	BRCA	5468.PPARG@50409	2.14245	0.0321718
5' EML4	HDAC2	LUAD	3066.HDAC2@62634	2.14	0.0323698
5' TBCD	STAG1	BRCA	10274.STAG1@1493	-2.13973	0.0323918
5' NF1	HDAC2	SARC	3066.HDAC2@8660	-2.13894	0.0324554
5' EGFR	KLF12	LGG	11278.KLF12@65071	2.13808	0.0325252
5' ERBB2	EPO	BRCA	2056.EPO@57111	2.13755	0.0325682
5' ERBB2	TBL1XR1	BRCA	79718.TBL1XR1@45876	-2.13664	0.0326422
5' NF1	USP49	SARC	25862.USP49@39345	2.1359	0.0327026
5' CPS1	E2F1	LIHC	1869.E2F1@1212	-2.13551	0.0327348
5' EGFR	COPS2	GBM	9318.COPS2@62811	2.13497	0.0327787
3' RET	FOS	THCA	2353.FOS@1741	2.13481	0.0327918
5' ARID1A	SNAPC1	BRCA	6617.SNAPC1@35268	-2.13302	0.032938
5' ANK3	GATAD1	BRCA	57798.GATAD1@1219	-2.13249	0.0329819
5' ARID1A	ARRB1	BRCA	408.ARRB1@50152	2.13239	0.0329896
3' RET	CEBPG	THCA	1054.CEBPG@64052	-2.13214	0.0330101
5' RAF1	DEK	THCA	7913.DEK@49697	-2.13194	0.0330267
5' EGFR	ZFP42	LGG	132625.ZFP42@51548	2.13158	0.0330563
5' NCOA4	JUNB	THCA	3726.JUNB@42770	-2.12973	0.0332093
5' CCDC6	TAF3	THCA	83860.TAF3@38585	2.12913	0.0332586
5' TBCD	BCAT1	BRCA	586.BCAT1@5454	2.12902	0.0332681
5' CCDC6	GTF2B	THCA	2959.GTF2B@56961	2.12793	0.033358
5' RAF1	ATF3	THCA	467.ATF3@46174	2.12698	0.0334372
5' EGFR	MECP2	GBM	4204.MECP2@34394	2.12692	0.0334419
5' TBCD	SMARCA4	BRCA	6597.SMARCA4@4542	-2.12544	0.0335652
5' NF1	HIC1	SARC	3090.HIC1@64553	-2.12538	0.0335698
5' ERG	STAT5B	PRAD	6777.STAT5B@53637	2.1252	0.0335859
5' ERBB2	ZNF547	BRCA	284306.ZNF547@64830	2.12504	0.0335982
5' ERBB2	ZNF138	BLCA	7697.ZNF138@63871	2.12498	0.0336032
3' NSD1	ZBTB14	BRCA	7541.ZBTB14@65146	-2.12446	0.0336467
5' RAF1	NIPBL	THCA	25836.NIPBL@50516	-2.12277	0.0337884
5' CPS1	MYB	LIHC	4602.MYB@50565	2.12274	0.0337913
5' ERBB2	EOMES	BRCA	8320.EOMES@51447	2.12239	0.0338199
5' VPS13B	TET2	BRCA	54790.TET2@33992	2.1223	0.0338281
5' ERBB2	KLF5	BLCA	688.KLF5@38831	-2.11913	0.0340947
5' ERG	ELK3	PRAD	2004.ELK3@50434	-2.11891	0.0341141
5' TBCD	TRIM25	BRCA	7706.TRIM25@62994	-2.11842	0.0341552
5' ERG	TP63	PRAD	8626.TP63@36141	-2.11825	0.0341698
3' RET	E2F2	THCA	1870.E2F2@38865	2.11695	0.0342791
5' ZDHHC17	ZNF2	SARC	7549.ZNF2@62526	2.11666	0.0343043
5' TBCD	CDX2	BRCA	1045.CDX2@356	2.11569	0.0343864
5' NF1	MTA2	SARC	9219.MTA2@63212	2.11545	0.0344073
5' EML4	TCF12	LUAD	6938.TCF12@46362	-2.11205	0.0346979
5' CCDC6	GTF3C2	THCA	2976.GTF3C2@45756	-2.11167	0.0347305
5' CPS1	SCRT1	LIHC	83482.SCRT1@64013	-2.10917	0.0349456
5' NCOA4	TAL1	THCA	6886.TAL1@44433	2.10834	0.0350172
5' ERBB2	FOXA1	BRCA	3169.FOXA1@51056	-2.10742	0.0350964
5' NF1	TAF3	SARC	83860.TAF3@38585	2.10607	0.0352139
5' NCOA4	HSF1	THCA	3297.HSF1@51863	2.10573	0.0352431
5' NF1	T	SARC	6862.T@43972	2.10537	0.0352749
5' ERBB2	SMARCA5	BRCA	8467.SMARCA5@64776	2.10526	0.0352842
5' EGFR	PROX1	GBM	5629.PROX1@49669	2.10442	0.0353572
5' EGFR	RFX2	GBM	5990.RFX2@38761	-2.1042	0.0353765
5' ERG	RB1	PRAD	5925.RB1@1870	-2.10414	0.0353824
5' EGFR	PPARD	GBM	5467.PPARD@44351	2.10351	0.0354369
5' CPS1	HMGN3	LIHC	9324.HMGN3@45920	2.10314	0.0354687
5' ERBB2	TCF7	BRCA	6932.TCF7@64697	2.10175	0.0355903
5' EML4	EBF1	LUAD	1879.EBF1@59344	2.10116	0.0356428
5' EML4	BARX2	LUAD	8538.BARX2@38820	2.10115	0.0356433
5' EML4	SMARCA4	LUAD	6597.SMARCA4@64633	-2.09977	0.035765
5' CCDC6	SNAPC1	THCA	6617.SNAPC1@35268	2.09906	0.0358269
5' ZDHHC17	ASCL2	SARC	430.ASCL2@38812	-2.09779	0.0359395
5' CPS1	IRF5	LIHC	3663.IRF5@37185	2.09758	0.0359582
5' CPS1	FOXD2	LIHC	2306.FOXD2@38635	-2.09715	0.035996
5' CPS1	ZNF467	LIHC	168544.ZNF467@65062	2.09694	0.0360142
3' NSD1	HOXB13	BRCA	10481.HOXB13@56668	2.09669	0.0360367
5' CCDC6	ETV4	THCA	2118.ETV4@64317	-2.09567	0.036127
5' ANK3	NR2F2	BRCA	7026.NR2F2@63318	-2.09559	0.0361337
5' ANK3	OSR2	BRCA	116039.OSR2@65108	2.09535	0.0361552
5' ANK3	SSRP1	BRCA	6749.SSRP1@63943	2.09514	0.0361738
5' NF1	DNMT1	SARC	1786.DNMT1@65040	2.09507	0.0361802
5' ARID1A	DDX5	BRCA	1655.DDX5@1208	-2.0947	0.0362131
5' ARID1A	GATA6	BRCA	2627.GATA6@47595	2.09465	0.0362172
5' ERBB2	UBTF	BLCA	7343.UBTF@64087	2.09448	0.0362324
3' NSD1	TTF2	BRCA	8458.TTF2@36230	2.09424	0.0362542
5' NF1	JUNB	SARC	3726.JUNB@64781	2.09376	0.0362969
5' ERBB2	E2F2	BRCA	1870.E2F2@38865	2.0917	0.0364806
5' NCOA4	ZFP69B	THCA	65243.ZFP69B@63423	2.08997	0.0366366
3' RET	E2F1	THCA	1869.E2F1@53013	-2.08956	0.0366727
5' TBCD	ZNF384	BRCA	171017.ZNF384@45634	2.08935	0.0366918
3' RET	SUZ12	THCA	23512.SUZ12@38163	2.08884	0.0367374
5' EML4	HNF1A	LUAD	6927.HNF1A@64546	-2.08874	0.0367468
5' VPS13B	HES2	BRCA	54626.HES2@64217	2.08828	0.0367882
5' TBCD	DNMT1	BRCA	1786.DNMT1@65040	-2.08776	0.0368349
5' CCDC6	KLF1	THCA	10661.KLF1@39350	-2.08764	0.0368456
5' ERBB2	TRIM28	BLCA	10155.TRIM28@52087	-2.08615	0.0369803
3' NSD1	ZNF16	BRCA	7564.ZNF16@62681	-2.08581	0.0370114
5' TBCD	MTA2	BRCA	9219.MTA2@63517	-2.08553	0.0370373
5' ARID1A	ARNT	BRCA	405.ARNT@5517	2.08533	0.0370547
5' CCDC6	GLIS1	THCA	148979.GLIS1@65214	-2.08491	0.0370932
5' ZDHHC17	PHF6	SARC	84295.PHF6@44144	2.08425	0.0371533
5' RAF1	GLYR1	THCA	84656.GLYR1@1225	2.08388	0.0371868
5' ERBB2	BCLAF1	BRCA	9774.BCLAF1@6958	2.08256	0.0373071
3' RET	ING2	THCA	3622.ING2@41572	-2.08247	0.0373154
5' EML4	RXRG	LUAD	6258.RXRG@2467	2.08201	0.0373572
5' ZDHHC17	KLF16	SARC	83855.KLF16@64425	-2.08165	0.0373898
5' VPS13B	ZSCAN29	BRCA	146050.ZSCAN29@62919	2.08163	0.0373922
3' RET	SMC3	THCA	9126.SMC3@62504	2.08106	0.0374445
3' NSD1	ING2	BRCA	3622.ING2@41572	2.08005	0.0375365
5' NF1	GATA1	SARC	2623.GATA1@8458	2.07971	0.0375682
5' VPS13B	CHD5	BRCA	26038.CHD5@40348	2.07889	0.0376432
5' ERG	KDM1A	PRAD	23028.KDM1A@64822	-2.07846	0.0376834
5' EGFR	CDK9	GBM	1025.CDK9@40227	-2.07845	0.0376842
5' ERG	SMARCE1	PRAD	6605.SMARCE1@62879	-2.07803	0.037723
3' ABL1	MITF	LAML	4286.MITF@42179	-2.07567	0.0379431
5' ERBB2	KLF9	BRCA	687.KLF9@49949	2.07541	0.0379641
5' ZDHHC17	ZNF197	SARC	10168.ZNF197@63956	2.07473	0.0380273
5' TBCD	PRDM6	BRCA	93166.PRDM6@65125	2.0743	0.0380674
5' ERBB2	RBL1	BLCA	5933.RBL1@38496	2.07409	0.0380864
5' ERBB2	TBX21	BLCA	30009.TBX21@33678	-2.07402	0.0380931
5' NF1	SP2	SARC	6668.SP2@46176	2.07395	0.0381001
5' ZDHHC17	GLIS2	SARC	84662.GLIS2@63826	-2.0729	0.0381976
5' ANK3	EHMT2	BRCA	10919.EHMT2@56463	2.0722	0.0382624
5' ARID1A	ZNF175	BRCA	7728.ZNF175@62529	2.07102	0.0383731
5' EGFR	ZFP37	GBM	7539.ZFP37@63399	2.07097	0.038378
5' ERG	NR2F6	PRAD	2063.NR2F6@64300	2.0701	0.0384597
5' CPS1	MXI1	LIHC	4601.MXI1@45810	2.06942	0.0385228
5' NF1	LIN9	SARC	286826.LIN9@5888	2.06933	0.0385307
5' NCOA4	MAFB	THCA	9935.MAFB@50112	2.06912	0.0385512
5' CPS1	SPDEF	LIHC	25803.SPDEF@35052	-2.06812	0.038645
5' EGFR	SIN3A	GBM	25942.SIN3A@45639	-2.06803	0.038653
5' ERBB2	ING2	BLCA	3622.ING2@41572	2.06759	0.038695
5' ZDHHC17	ZNF207	SARC	7756.ZNF207@64210	-2.06757	0.0386961
3' RET	NCOA1	THCA	8648.NCOA1@64887	2.06722	0.0387293
5' EML4	ZNF592	LUAD	9640.ZNF592@64278	2.06711	0.0387398
5' TBCD	ZNF654	BRCA	55279.ZNF654@63738	2.06677	0.0387716
5' CPS1	MED1	LIHC	5469.MED1@58341	2.06658	0.0387895
5' ARID1A	ZEB1	BRCA	6935.ZEB1@64828	2.06658	0.03879
5' ERBB2	ZNF263	BRCA	10127.ZNF263@45726	2.0665	0.0387973
5' CPS1	NR2F1	LIHC	7025.NR2F1@56817	2.06324	0.0391057
5' ZDHHC17	TET2	SARC	54790.TET2@33992	2.06305	0.0391234
3' ABL1	GATA3	LAML	2625.GATA3@46361	2.0629	0.0391415
5' ERBB2	SOX13	BLCA	9580.SOX13@63594	-2.06223	0.0392017
5' ERBB2	ATF3	BRCA	467.ATF3@46055	-2.06185	0.0392384
5' ANK3	HNRNPLL	BRCA	92906.HNRNPLL@63857	2.06151	0.0392701
5' RAF1	SP2	THCA	6668.SP2@65084	-2.06094	0.0393244
5' RAF1	USP49	THCA	25862.USP49@39347	-2.0587	0.0395389
3' NSD1	JUN	BRCA	3725.JUN@55299	-2.0587	0.0395392
5' ANK3	NFIC	BRCA	4782.NFIC@46101	-2.05828	0.0395796
5' EGFR	RCOR1	LGG	23186.RCOR1@45777	-2.05792	0.0396135
3' NSD1	GFI1B	BRCA	8328.GFI1B@63597	-2.05791	0.0396152
5' CPS1	CHD7	LIHC	55636.CHD7@8808	-2.05624	0.0397756
5' ERBB2	ZNF35	BLCA	7584.ZNF35@65180	-2.05606	0.0397924
5' ZDHHC17	EBF1	SARC	1879.EBF1@46129	-2.05546	0.0398506
5' NF1	TFAP2C	SARC	7022.TFAP2C@49630	-2.05383	0.0400082
5' ERBB2	EGR1	BRCA	1958.EGR1@46298	-2.05382	0.0400093
5' VPS13B	LEF1	BRCA	51176.LEF1@57115	-2.05326	0.0400631
5' CPS1	SMC3	LIHC	9126.SMC3@62504	2.0531	0.0400793
5' CCDC6	RBPJ	THCA	3516.RBPJ@43102	-2.0518	0.0402048
5' ARID1A	NFYC	BRCA	4802.NFYC@42774	2.05141	0.0402428
5' ARID1A	GTF2F1	BRCA	2962.GTF2F1@45737	-2.04912	0.0404663
3' ABL1	RXRA	LAML	6256.RXRA@46125	-2.04895	0.0404864
5' ANK3	ZNF92	BRCA	168374.ZNF92@49482	2.04761	0.0406145
5' ANK3	MYH11	BRCA	4629.MYH11@37625	2.04744	0.0406309
5' CCDC6	ZSCAN20	THCA	7579.ZSCAN20@64441	2.04625	0.0407483
5' EGFR	IRF2	LGG	3660.IRF2@33542	2.04546	0.0408256
5' EGFR	BRD3	GBM	8019.BRD3@35874	2.04535	0.040837
3' ABL1	NR3C1	LAML	2908.NR3C1@57915	-2.04455	0.0409184
5' CPS1	ERCC3	LIHC	2071.ERCC3@41411	2.04444	0.0409268
3' RET	MRE11A	THCA	4361.MRE11A@51839	-2.04323	0.041046
5' EML4	MAFK	LUAD	7975.MAFK@45864	-2.04204	0.0411634
5' CPS1	CDK9	LIHC	1025.CDK9@53346	-2.04026	0.0413411
3' RET	ZNF366	THCA	167465.ZNF366@62732	2.03997	0.0413696
5' TBCD	T	BRCA	6862.T@53302	-2.0398	0.0413869
5' ZDHHC17	CHD8	SARC	57680.CHD8@51104	-2.0391	0.0414565
5' ZDHHC17	SREBF1	SARC	6720.SREBF1@45824	2.03782	0.0415844
5' NF1	KLF15	SARC	28999.KLF15@65072	-2.03763	0.0416032
5' CCDC6	INTS3	THCA	65123.INTS3@53323	2.03679	0.0416872
5' ERG	OSR2	PRAD	116039.OSR2@63286	2.03656	0.041711
5' VPS13B	MAF	BRCA	4094.MAF@58808	2.03529	0.0418383
5' ERBB2	ZNF366	BLCA	167465.ZNF366@62732	-2.03503	0.0418647
5' ERBB2	ATF3	BLCA	467.ATF3@46217	-2.0345	0.0419172
5' EML4	MITF	LUAD	4286.MITF@42179	-2.0345	0.0419173
5' EML4	BAHD1	LUAD	22893.BAHD1@57659	2.0337	0.0419986
5' ERBB2	FOSL2	BRCA	2355.FOSL2@46317	2.03346	0.0420226
5' ZDHHC17	TCF4	SARC	6925.TCF4@47101	-2.03325	0.0420433
5' NF1	CTNNB1	SARC	1499.CTNNB1@53653	2.03142	0.0422288
5' NCOA4	MYOD1	THCA	4654.MYOD1@36077	2.03128	0.0422426
5' NCOA4	THAP1	THCA	55145.THAP1@46306	2.03112	0.0422591
5' ARID1A	HMGN3	BRCA	9324.HMGN3@45920	-2.03081	0.042291
5' ZDHHC17	LARP7	SARC	51574.LARP7@57091	2.02992	0.0423809
5' RAF1	NONO	THCA	4841.NONO@64839	-2.02899	0.0424758
5' TBCD	DCP1A	BRCA	55802.DCP1A@36226	2.02886	0.0424887
5' CCDC6	SSRP1	THCA	6749.SSRP1@63943	2.02806	0.0425706
3' NSD1	NCAPG2	BRCA	54892.NCAPG2@54631	-2.0279	0.0425866
5' ERG	TFAP2A	PRAD	7020.TFAP2A@45753	-2.02603	0.0427795
3' RET	DDX21	THCA	9188.DDX21@50210	2.02564	0.0428185
5' ERBB2	HOXA2	BRCA	3199.HOXA2@38708	-2.02508	0.0428761
5' VPS13B	EGR1	BRCA	1958.EGR1@46298	2.0237	0.0430173
5' VPS13B	ZNF329	BRCA	79673.ZNF329@65060	-2.02367	0.043021
5' CPS1	RING1	LIHC	6015.RING1@41489	2.02362	0.0430262
5' VPS13B	ZNF146	BRCA	7705.ZNF146@64241	2.0234	0.0430488
5' ANK3	CTBP1	BRCA	1487.CTBP1@36085	-2.02308	0.0430813
5' EGFR	GATA4	GBM	2626.GATA4@63975	-2.0218	0.0432134
5' ERG	SPI1	PRAD	6688.SPI1@48316	-2.02145	0.0432506
5' ANK3	TRIM25	BRCA	7706.TRIM25@62994	-2.02095	0.0433009
5' EGFR	EOMES	GBM	8320.EOMES@51447	-2.02029	0.0433703
5' ANK3	ZNF48	BRCA	197407.ZNF48@63763	2.01975	0.0434258
5' TBCD	ETS2	BRCA	2114.ETS2@63993	2.019	0.0435039
5' NCOA4	GATA3	THCA	2625.GATA3@33680	2.01873	0.0435322
5' CPS1	EP300	LIHC	2033.EP300@46225	-2.01789	0.043619
5' EML4	ELK1	LUAD	2002.ELK1@1213	2.01752	0.0436576
5' VPS13B	GTF2B	BRCA	2959.GTF2B@56962	2.01746	0.0436645
3' NSD1	ESRRA	BRCA	2101.ESRRA@45627	-2.0172	0.0436916
5' EGFR	NFYC	LGG	4802.NFYC@42774	2.01671	0.0437423
5' TBCD	NR5A2	BRCA	2494.NR5A2@33220	2.01621	0.0437951
5' ARID1A	HDAC8	BRCA	55869.HDAC8@64617	2.01581	0.0438362
5' ERBB2	ZNF264	BRCA	9422.ZNF264@63774	-2.01559	0.0438595
5' ZDHHC17	SF1	SARC	7536.SF1@33852	2.01349	0.0440797
3' RET	ETS2	THCA	2114.ETS2@38712	2.01345	0.0440843
5' RAF1	MBD3	THCA	53615.MBD3@59412	-2.01327	0.0441025
5' CCDC6	E2F2	THCA	1870.E2F2@38865	2.013	0.044131
5' TBCD	RING1	BRCA	6015.RING1@41489	2.01297	0.0441349
5' CCDC6	E2F8	THCA	79733.E2F8@38804	-2.01293	0.0441388
5' ARID1A	ASCL2	BRCA	430.ASCL2@38812	2.01238	0.0441965
5' ARID1A	TCF7L1	BRCA	83439.TCF7L1@40166	-2.01213	0.0442225
5' EML4	HOXA2	LUAD	3199.HOXA2@38708	-2.01039	0.0444069
5' VPS13B	ZNF346	BRCA	23567.ZNF346@62899	-2.00952	0.0444991
5' ERG	BAHD1	PRAD	22893.BAHD1@57659	2.00883	0.0445728
5' RAF1	TCF21	THCA	6943.TCF21@52495	-2.00811	0.0446479
5' TBCD	ERCC3	BRCA	2071.ERCC3@41411	2.00774	0.044688
5' NCOA4	FOXO1	THCA	2308.FOXO1@58300	-2.00754	0.0447093
5' ERG	TBP	PRAD	6908.TBP@45618	-2.007	0.0447668
5' RAF1	ASCL1	THCA	429.ASCL1@49725	-2.00604	0.044869
5' RAF1	T	THCA	6862.T@43972	2.00586	0.0448877
3' NSD1	SETDB1	BRCA	9869.SETDB1@45386	2.00583	0.044891
5' EML4	HDAC6	LUAD	10013.HDAC6@4126	2.00415	0.0450705
5' ZDHHC17	IRF2	SARC	3660.IRF2@33542	2.00234	0.0452652
5' ERBB2	KDM2B	BLCA	84678.KDM2B@58074	2.00225	0.0452749
5' EML4	GRHL2	LUAD	79977.GRHL2@35323	2.00076	0.0454355
3' ABL1	DNMT3B	LAML	1789.DNMT3B@62874	-2.00004	0.0455155
5' VPS13B	KLF8	BRCA	11279.KLF8@64092	-1.99998	0.0455191
5' NCOA4	TAF7	THCA	6879.TAF7@46195	-1.99988	0.0455299
5' ERBB2	ZNF554	BRCA	115196.ZNF554@65061	-1.99783	0.0457517
5' ZDHHC17	NR2F1	SARC	7025.NR2F1@56817	1.99665	0.0458798
5' ERBB2	KLF16	BLCA	83855.KLF16@64425	-1.99655	0.0458906
5' ERBB2	EPO	BLCA	2056.EPO@57110	-1.99426	0.04614
5' EGFR	PAX6	LGG	5080.PAX6@50898	-1.99345	0.0462287
5' NCOA4	CBX2	THCA	84733.CBX2@57671	1.99276	0.0463042
3' NSD1	ETV1	BRCA	2115.ETV1@63177	-1.99272	0.0463094
5' EGFR	DROSHA	GBM	29102.DROSHA@63271	1.99243	0.0463408
5' ERBB2	DMC1	BRCA	11144.DMC1@50422	1.99211	0.0463756
5' NCOA4	ZNF592	THCA	9640.ZNF592@64278	1.99202	0.0463858
5' EGFR	ZSCAN22	LGG	342945.ZSCAN22@65153	1.99134	0.0464602
5' CPS1	CBFB	LIHC	865.CBFB@37604	-1.98979	0.046631
3' NSD1	LHX2	BRCA	9355.LHX2@50899	1.98943	0.0466705
5' CCDC6	EGR3	THCA	1960.EGR3@65186	1.98879	0.046741
3' ABL1	CHD7	LAML	55636.CHD7@49781	1.98853	0.0467728
5' ZDHHC17	ELK3	SARC	2004.ELK3@50434	1.98826	0.0468003
5' VPS13B	PHF8	BRCA	23133.PHF8@1308	-1.98754	0.0468794
5' ERBB2	BATF	BLCA	10538.BATF@46109	1.98697	0.0469431
5' ERBB2	MBD2	BRCA	8932.MBD2@48824	-1.98598	0.047052
5' TBCD	RUNX1	BRCA	861.RUNX1@54234	1.98573	0.0470802
5' ANK3	ZNF687	BRCA	57592.ZNF687@64786	-1.98571	0.0470824
5' VPS13B	ZNF143	BRCA	7702.ZNF143@45946	1.98558	0.047097
5' CCDC6	NR2F1	THCA	7025.NR2F1@56817	1.98546	0.0471107
5' ERBB2	ZNF71	BLCA	58491.ZNF71@62769	1.98415	0.0472557
5' ERBB2	CSDE1	BLCA	7812.CSDE1@63484	1.98344	0.0473356
3' RET	ZNF239	THCA	8187.ZNF239@63580	-1.98323	0.0473592
5' EML4	SMARCA5	LUAD	8467.SMARCA5@64776	1.98174	0.0475256
5' ERBB2	GFI1B	BLCA	8328.GFI1B@43448	1.98168	0.0475316
3' RET	ETV4	THCA	2118.ETV4@64317	-1.98164	0.0475369
5' EGFR	SPI1	LGG	6688.SPI1@49740	-1.98135	0.0475694
5' EGFR	DDX21	GBM	9188.DDX21@50210	1.98131	0.0475738
5' ANK3	GRHL3	BRCA	57822.GRHL3@33916	-1.98119	0.0475874
5' TBCD	LYL1	BRCA	4066.LYL1@58999	-1.98099	0.0476097
5' ZDHHC17	CHAMP1	SARC	283489.CHAMP1@62620	-1.98095	0.0476136
5' EGFR	TAL1	LGG	6886.TAL1@44433	1.98087	0.047623
5' EGFR	MCM3	GBM	4172.MCM3@65048	1.98038	0.0476775
5' NF1	KAT5	SARC	10524.KAT5@4631	1.97898	0.0478356
5' ERBB2	TBP	BLCA	6908.TBP@45881	1.9789	0.0478444
5' RAF1	FLI1	THCA	2313.FLI1@5443	1.97866	0.0478715
5' CCDC6	TCF4	THCA	6925.TCF4@47101	1.97865	0.0478726
5' ERBB2	AEBP2	BRCA	121536.AEBP2@64454	1.97733	0.0480217
5' ERG	MED12	PRAD	9968.MED12@38653	-1.97652	0.0481142
5' ARID1A	NRF1	BRCA	4899.NRF1@58940	1.97639	0.0481275
5' EGFR	CDK6	LGG	1021.CDK6@43305	-1.9761	0.04816
5' EML4	CHD8	LUAD	57680.CHD8@51104	-1.976	0.0481719
5' ERBB2	TCF7L1	BRCA	83439.TCF7L1@46140	1.97543	0.0482363
3' NSD1	HES1	BRCA	3280.HES1@62672	1.97443	0.0483499
5' ERBB2	DLX1	BRCA	1745.DLX1@38719	-1.9741	0.0483872
3' NSD1	ZFX	BRCA	7543.ZFX@50077	-1.97361	0.0484428
5' ARID1A	FOXP2	BRCA	93986.FOXP2@46340	-1.97352	0.0484536
5' NF1	ELK1	SARC	2002.ELK1@64165	1.97317	0.0484938
5' VPS13B	HDGF	BRCA	3068.HDGF@62954	-1.97294	0.0485192
5' EGFR	RXRG	GBM	6258.RXRG@2813	-1.97263	0.0485548
5' NF1	EMX1	SARC	2016.EMX1@44564	1.97198	0.0486287
3' NSD1	FOXA2	BRCA	3170.FOXA2@52684	1.97027	0.0488242
5' ANK3	EBF1	BRCA	1879.EBF1@46129	-1.9701	0.048844
5' CCDC6	ATOH1	THCA	474.ATOH1@38856	1.96952	0.0489101
5' ARID1A	ZNF414	BRCA	84330.ZNF414@63766	-1.96773	0.0491164
5' VPS13B	ZNF217	BRCA	7764.ZNF217@45978	1.96738	0.0491565
5' ERG	PROX1	PRAD	5629.PROX1@49669	-1.9655	0.0493745
5' RAF1	PRDM10	THCA	56980.PRDM10@63034	1.9653	0.0493971
5' ERBB2	SRC	BRCA	6714.SRC@6710	1.96522	0.0494058
5' EML4	GTF2B	LUAD	2959.GTF2B@36362	-1.96249	0.0497227
5' ERBB2	PRPF4	BLCA	9128.PRPF4@63089	-1.96232	0.0497424
5' NCOA4	RBL2	THCA	5934.RBL2@1874	-1.96116	0.0498776
5' CPS1	E2F7	LIHC	144455.E2F7@38698	-1.96082	0.0499178
5' TBCD	EHMT2	BRCA	10919.EHMT2@56463	1.95994	0.0500203
5' NCOA4	HOXB13	THCA	10481.HOXB13@56666	1.95981	0.0500348
5' EGFR	L3MBTL2	GBM	83746.L3MBTL2@63814	-1.95872	0.0501635
5' ANK3	ATF1	BRCA	466.ATF1@45871	1.95599	0.050483
5' TBCD	HIRA	BRCA	7290.HIRA@50178	1.95557	0.0505329
5' CCDC6	ARNTL	THCA	406.ARNTL@42749	-1.95518	0.0505794
5' TBCD	SP1	BRCA	6667.SP1@65151	-1.95509	0.0505898
[truncated: 1,034 more rows]
