# Supplementary material for: Genetic fusions favor tumorigenesis through degron loss in oncogenes
Source: Nat Commun. 2021 Nov 18;12:6704. doi: 10.1038/s41467-021-26871-y (PMC8602260; doi:10.1038/s41467-021-26871-y)
Supplement: Supplementary file 8 — Dataset 6 [file 41467_2021_26871_MOESM8_ESM.xlsx]

## Sheet: Sheet1
gene	fraction of inframe fusions	degron loss score	p-value (degron)	q-value (degron)	p-value (cancer type)	combined p-value	combined q-value
5' RAF1	0.866667	3.78621	0.0026	0.0912476	0.0001	4.20227e-06	0.00168529
5' EGFR	0.772727	10.3341	0.0001	0.0092125	0.0035	5.55287e-06	0.00168529
5' CPS1	0.666667	4.29187	0.0001	0.0092125	0.0421	5.63216e-05	0.0113957
5' CDS1	1	1.90095	0.0581	0.44144	0.0001	7.5855e-05	0.011511
5' TBCD	0.75	4.12112	0.0001	0.0092125	0.1725	0.000206443	0.0250622
5' MAN1A1	0.5	2.90901	0.0001	0.0092125	0.2344	0.000273335	0.0276524
5' ASMTL	1	1.09235	0.313	1	0.0001	0.00035594	0.0308651
5' TYMS	1	1.97614	0.0002	0.0163778	0.2312	0.000507792	0.0385287
5' MRPL48	0.533333	-0.0421187	0.8469	1	0.0001	0.000878787	0.0390149
5' WNK1	0.615385	4.38483	0.0001	0.0092125	0.899	0.000927481	0.0390149
5' PML	0.823529	-0.903463	0.9897	1	0.0001	0.00101154	0.0390149
5' EPS15L1	0.555556	3.48247	0.0001	0.0092125	1	0.00102103	0.0390149
5' TRPC4AP	0.625	2.51867	0.0001	0.0092125	1	0.00102103	0.0390149
5' CORO1C	0.666667	2.1888	0.0001	0.0092125	1	0.00102103	0.0390149
5' TMPRSS2	0.661538	-4.5201	1	1	0.0001	0.00102103	0.0390149
5' EFCAB2	1	1.62777	0.0012	0.0520235	0.084	0.0010284	0.0390149
5' NCOA4	1	1.01723	0.0836	0.522146	0.0028	0.00219095	0.0748302
5' DYRK2	1	1.35688	0.0028	0.0938	0.0848	0.00221902	0.0748302
5' ECE1	0.833333	2.1356	0.002	0.0775789	0.1402	0.00257387	0.0822285
5' BLNK	0.666667	1.12826	0.0085	0.178986	0.0801	0.00564572	0.159616
5' GPI	1	1.90456	0.0007	0.0429917	1	0.0057851	0.159616
5' L3MBTL4	1	1.594	0.0007	0.0429917	1	0.0057851	0.159616
5' SNX27	0.777778	2.83225	0.0009	0.0510231	1	0.0072118	0.190329
5' ABCC3	1	1.57147	0.0432	0.39798	0.0245	0.0083095	0.203644
5' USP39	0.6	1.78957	0.0011	0.0520235	1	0.00859369	0.203644
5' ARHGEF1	0.666667	1.02608	0.0146	0.256195	0.0806	0.00911399	0.203644
5' OXCT1	0.666667	1.38989	0.0012	0.0520235	1	0.00927052	0.203644
5' PDZRN3	0.8	1.28478	0.0295	0.339711	0.0413	0.00939379	0.203644
5' CDH23	1	0.977987	0.0165	0.266574	0.0836	0.0104643	0.219028
5' TRAPPC10	0.666667	1.804	0.0039	0.109185	0.4002	0.0116474	0.231522
5' PTOV1	1	1.32153	0.0016	0.0655111	1	0.0119004	0.231522
5' TMEM135	0.545455	0.384429	0.5681	1	0.0029	0.0122054	0.231522
5' SMYD3	0.666667	1.71282	0.0054	0.128381	0.3856	0.0149386	0.27478
5' SSBP3	1	1.34226	0.0095	0.194486	0.2287	0.0154949	0.27663
5' PRCC	0.777778	2.13749	0.0112	0.217221	0.251	0.0193246	0.331199
5' GRB2	0.636364	2.45353	0.0035	0.10318	0.8187	0.0196427	0.331199
5' DPYD	0.5	1.54613	0.003	0.0961304	1	0.0204274	0.33512
5' ATP6V0A1	0.75	1.6072	0.0033	0.101337	1	0.0221556	0.353907
5' FOXO3	1	1.19928	0.0183	0.27269	0.2238	0.0266122	0.414196
5' NUP98	0.5	0.384176	0.3584	1	0.0122	0.0281256	0.416114
5' COL4A1	1	0.80321	0.0947	0.541412	0.0469	0.0284997	0.416114
5' RLF	0.833333	1.87832	0.0082	0.178986	0.5591	0.029273	0.416114
5' TIGAR	0.6	1.17256	0.0204	0.27738	0.2266	0.0294776	0.416114
5' YME1L1	1	1.17677	0.005	0.127069	1	0.0314916	0.434441
5' RASA1	0.8	1.72582	0.0053	0.128381	1	0.0330723	0.446108
5' NTN4	0.6	0.290629	0.4458	1	0.0135	0.0367896	0.485462
5' NAA35	1	1.17844	0.0068	0.156612	1	0.0407377	0.526123
5' SND1	0.555556	1.14645	0.0856	0.530145	0.0936	0.0466852	0.590373
5' FOXO1	0.666667	1.13212	0.0085	0.178986	1	0.0490254	0.607314
5' PDE7A	0.6	-0.0447123	0.7672	1	0.0124	0.0537982	0.625113
5' STARD3	0.555556	1.09448	0.1091	0.595019	0.0895	0.0549642	0.625113
5' ANKRD17	0.5	0.566721	0.1177	0.628586	0.0844	0.055747	0.625113
5' OAF	1	0.563862	0.1219	0.632678	0.0822	0.0561446	0.625113
5' UBE2Z	0.5	-0.0891593	0.8033	1	0.0125	0.0562416	0.625113
5' SLC45A3	0.75	-0.204033	0.8775	1	0.0116	0.0568744	0.625113
5' ARID4B	0.6	1.32917	0.0104	0.207157	1	0.0578859	0.625113
5' CEP70	1	1.34173	0.0264	0.318964	0.4032	0.0589993	0.625113
5' WDR70	0.714286	0.209723	0.6432	1	0.0168	0.0597307	0.625113
5' STK39	0.625	1.59775	0.0207	0.27738	0.568	0.0639996	0.658437
5' HECTD4	0.615385	2.13474	0.0205	0.27738	0.5873	0.0652495	0.660107
5' CLU	0.666667	1.27639	0.0316	0.352867	0.3977	0.0675702	0.666975
5' C19orf47	0.75	0.945845	0.0561	0.440665	0.2291	0.0688151	0.666975
5' PACRG	1	0.501381	0.1598	0.764757	0.082	0.069906	0.666975
5' NUP153	0.571429	1.5296	0.0132	0.24321	1	0.0703235	0.666975
5' ZFPM2	0.5	0.981746	0.0145	0.256195	1	0.0758873	0.698189
5' F3	1	0.464549	0.1788	0.818482	0.0856	0.0792746	0.698189
5' KDM6A	0.5	1.49994	0.0281	0.334027	0.5524	0.0801807	0.698189
5' COPE	1	1.01465	0.0156	0.266574	1	0.0805036	0.698189
5' NEO1	0.75	0.876528	0.0696	0.475331	0.2247	0.0806663	0.698189
5' CSTA	1	0.451441	0.1895	0.85519	0.0841	0.0819018	0.698189
5' ARL8B	1	0.995177	0.0162	0.266574	1	0.0829885	0.698189
5' RAB21	0.5	0.617514	0.2734	0.98917	0.0616	0.0856204	0.698189
5' ADCY2	0.8	1.21174	0.0414	0.393067	0.4073	0.0857053	0.698189
5' ARAP1	0.5	1.22021	0.0169	0.266574	1	0.0858595	0.698189
5' PPP2R1A	0.75	1.22664	0.017	0.266574	1	0.0862672	0.698189
5' NTRK3	0.8	0.429914	0.408	1	0.0434	0.0891342	0.711901
5' TK1	0.5	0.983348	0.0181	0.27269	1	0.0907144	0.712313
5' TP53BP1	0.75	1.20716	0.0185	0.27269	1	0.0923147	0.712313
5' ZNF586	0.666667	0.240763	0.223	0.933813	0.0834	0.0927063	0.712313
5' CS	0.666667	0.383093	0.2476	0.955399	0.0819	0.0993278	0.75365
5' GLIS3	0.714286	0.985194	0.1437	0.710785	0.1462	0.102162	0.763777
5' SDC4	1	1.60071	0.0213	0.279284	1	0.103285	0.763777
5' FYTTD1	0.8	1.36117	0.0216	0.279284	1	0.104437	0.763777
5' RELB	1	0.923434	0.0221	0.280822	1	0.106349	0.768499
5' APPBP2	0.5	0.22161	0.5753	1	0.0422	0.114547	0.795712
5' PLXNA1	1	0.774124	0.1058	0.590717	0.2307	0.115031	0.795712
5' SLC35E3	0.666667	0.155646	0.6352	1	0.0392	0.116852	0.795712
5' NEBL	0.5	1.09388	0.0648	0.459208	0.3929	0.118914	0.795712
5' ANKRD22	1	0.323143	0.3037	1	0.0848	0.119991	0.795712
5' TAB2	0.666667	0.298834	0.3152	1	0.0819	0.120215	0.795712
5' BCR	0.545455	-0.582591	0.9665	1	0.0268	0.120534	0.795712
5' NAALADL2	0.5	0.344193	0.4771	1	0.0545	0.120898	0.795712
5' HOOK3	0.555556	0.696861	0.2885	1	0.0916	0.122445	0.795712
5' MAP2K2	0.666667	1.05436	0.0657	0.461151	0.4055	0.123224	0.795712
5' ZFP30	1	0.8793	0.0287	0.335744	1	0.13061	0.834527
5' NADSYN1	0.666667	0.330673	0.6023	1	0.0521	0.140004	0.877895
5' NPEPPS	0.714286	1.29457	0.0566	0.440665	0.5586	0.140823	0.877895
5' ARHGEF17	1	1.00136	0.0831	0.522146	0.3961	0.145284	0.877895
5' TBC1D9	0.5	0.257846	0.3648	1	0.0905	0.14562	0.877895
5' ADI1	1	0.844702	0.0331	0.356217	1	0.145912	0.877895
5' EFR3A	0.8	0.20119	0.5938	1	0.0563	0.147038	0.877895
5' DDB1	1	1.06684	0.0337	0.356217	1	0.147952	0.877895
5' NPTXR	0.75	1.06278	0.034	0.356217	1	0.148967	0.877895
5' AP3B1	0.75	1.03969	0.0348	0.356217	1	0.151663	0.885188
5' MYLK	0.6	-0.290417	0.9061	1	0.0394	0.154675	0.892624
5' CCM2	0.8	-0.260881	0.8993	1	0.0401	0.155878	0.892624
5' CYFIP1	1	0.193217	0.4437	1	0.0834	0.158998	0.895395
5' GGA2	1	0.820634	0.0371	0.374558	1	0.159313	0.895395
5' SEC23B	1	1.22911	0.0677	0.470707	0.5656	0.163217	0.908926
5' PATJ	0.5	0.467683	0.45	1	0.0864	0.165134	0.91124
5' ASCC1	0.666667	-0.422603	0.9458	1	0.0421	0.168169	0.912393
5' TSPAN9	0.666667	0.15177	0.4895	1	0.0823	0.169674	0.912393
5' PPM1D	0.5	0.801334	0.041	0.393067	1	0.171962	0.912393
5' UHRF1	0.6	1.02504	0.0414	0.393067	1	0.173237	0.912393
5' LRCH3	1	0.79402	0.0416	0.393067	1	0.173874	0.912393
5' ITGB6	1	-0.00395542	0.7577	1	0.0554	0.175069	0.912393
5' RSRC2	1	0.153892	0.4934	1	0.086	0.176512	0.912393
5' PDGFB	1	0.782963	0.0431	0.39798	1	0.178616	0.912393
5' SLC10A7	1	0.127689	0.5154	1	0.0879	0.18549	0.912393
5' AXIN2	1	0.782267	0.0454	0.405794	1	0.185788	0.912393
5' LONP1	0.5	1.21706	0.0457	0.405794	1	0.186715	0.912393
5' CAMSAP2	0.5	0.784703	0.0464	0.407105	1	0.188869	0.912393
5' PACS1	0.8	0.696368	0.4583	1	0.1018	0.189651	0.912393
5' OSGIN2	0.666667	1.19102	0.0486	0.421391	1	0.195573	0.912393
5' ERC1	0.733333	0.338557	0.7546	1	0.0662	0.19965	0.912393
5' ABCC5	0.5	0.774046	0.0508	0.43034	1	0.202177	0.912393
5' SARS	1	0.026317	0.6558	1	0.0775	0.20225	0.912393
5' NOTCH2	0.6	0.905864	0.2336	0.938978	0.2183	0.202757	0.912393
5' EIF2S2	0.6	0.525288	0.2329	0.938978	0.2211	0.204241	0.912393
5' PRSS2	0.666667	0.0679206	0.5945	1	0.0873	0.205442	0.912393
5' PODXL	0.666667	0	0.6309	1	0.0824	0.205698	0.912393
5' OSBPL10	0.666667	0.0516541	0.6197	1	0.0839	0.205717	0.912393
5' SYNPO2	1	0.733398	0.0546	0.440665	1	0.213362	0.912393
5' IKBKB	0.5	0.741952	0.055	0.440665	1	0.214523	0.912393
5' CAP1	1	0.731573	0.0555	0.440665	1	0.215971	0.912393
5' RBPJ	0.666667	0.745704	0.0557	0.440665	1	0.216549	0.912393
5' PKM	1	0.0361704	0.6392	1	0.0881	0.218317	0.912393
5' TFE3	0.8	-0.640509	0.9796	1	0.0576	0.218638	0.912393
5' SIK2	0.75	0.952663	0.0566	0.440665	1	0.219141	0.912393
5' SLC34A2	1	-0.00435016	0.6929	1	0.0818	0.219368	0.912393
5' ATP9B	1	0.00494273	0.6857	1	0.0832	0.220432	0.912393
5' DAPK1	1	0.740848	0.0571	0.440665	1	0.220575	0.912393
5' SENP3	0.8	0.835024	0.1435	0.710785	0.3997	0.22131	0.912393
5' LAMA2	0.5	0.707194	0.0574	0.440665	1	0.221433	0.912393
5' IGFBP7	1	0.0170692	0.6605	1	0.087	0.221614	0.912393
5' SLC12A2	1	0.24601	0.6125	1	0.0945	0.222806	0.912393
5' KITLG	0.666667	-0.00733638	0.6953	1	0.0834	0.22311	0.912393
5' TMEM265	1	-0.0224825	0.7162	1	0.083	0.227239	0.912393
5' TXNRD1	0.5	0	0.6844	1	0.087	0.227517	0.912393
5' GRTP1	0.5	0.713529	0.0597	0.448156	1	0.22796	0.912393
5' COLGALT1	0.8	-0.610285	0.9772	1	0.0611	0.227979	0.912393
5' MACROD1	0.545455	1.28292	0.0955	0.541412	0.63	0.229269	0.912393
5' CPSF6	0.5	-0.0259027	0.8548	1	0.071	0.230744	0.912393
5' NCSTN	0.5	-0.0291508	0.7222	1	0.0844	0.23148	0.912393
5' ARHGEF25	1	-0.065061	0.7641	1	0.0814	0.234948	0.914363
5' GPC6	1	-0.0789487	0.7806	1	0.0797	0.234993	0.914363
5' USP25	0.666667	1.12116	0.0636	0.459208	1	0.238827	0.91855
5' IGF1R	0.714286	0.133411	0.6897	1	0.0929	0.240129	0.91855
5' CBL	0.666667	0.791601	0.1642	0.780745	0.3937	0.241699	0.91855
5' TRAPPC11	0.666667	0.700673	0.0648	0.459208	1	0.242122	0.91855
5' ADIPOR2	0.666667	-0.179292	0.8639	1	0.0787	0.250771	0.931471
5' ERBB2	0.555556	-1.04105	0.9937	1	0.07	0.254974	0.931471
5' PRPF6	0.666667	-0.0966041	0.7929	1	0.0878	0.255128	0.931471
5' CSGALNACT2	1	0.680081	0.0702	0.475331	1	0.25668	0.931471
5' JAK2	0.666667	0.688745	0.0703	0.475331	1	0.256945	0.931471
5' CHCHD6	0.6	0.301374	0.324	1	0.2188	0.258512	0.931471
5' NF2	0.727273	0.167169	0.7313	1	0.099	0.262486	0.931471
5' SSBP2	0.5	0.66775	0.0725	0.48575	1	0.262752	0.931471
5' BCL3	0.5	-0.165536	0.8533	1	0.0852	0.26328	0.931471
5' PDCD6	0.75	0.422154	0.3146	1	0.2325	0.264441	0.931471
5' RUNX2	0.666667	-0.209525	0.8819	1	0.083	0.26458	0.931471
5' ATP6AP1	1	0.666245	0.0733	0.486686	1	0.264847	0.931471
5' PRRG2	0.666667	-0.313359	0.9309	1	0.079	0.265477	0.931471
5' TF	1	-0.244849	0.9048	1	0.0825	0.268352	0.936148
5' DPY19L1	0.666667	0.664193	0.0771	0.50416	1	0.27468	0.952749
5' AP1M1	0.5	0.662593	0.0786	0.508142	1	0.27851	0.955453
5' ARFGEF2	0.714286	0.298934	0.5778	1	0.1361	0.278608	0.955453
5' ODF2	0.666667	-0.551127	0.9806	1	0.0822	0.283585	0.963315
5' SGSM2	1	0.839753	0.0808	0.517823	1	0.284075	0.963315
5' IRAK2	0.5	0.665909	0.0816	0.518441	1	0.286084	0.964737
5' EHBP1	0.833333	-0.203379	0.8832	1	0.0951	0.292044	0.979396
5' ZMYND11	1	0.634756	0.0865	0.531254	1	0.298218	0.990861
5' RBM38	0.6	0.341293	0.3864	1	0.2244	0.298728	0.990861
5' ALX4	1	0.634985	0.0888	0.539882	1	0.303818	0.993099
5' TSTD1	1	-0.577403	0.9841	1	0.0905	0.304449	0.993099
5' CLTA	0.5	0.63778	0.0894	0.539882	1	0.305268	0.993099
5' BCAR3	1	0.626864	0.0913	0.539882	1	0.309836	0.993099
5' TUFT1	0.833333	1.14758	0.0915	0.539882	1	0.310315	0.993099
5' SLC3A2	0.6	0.802677	0.092	0.539882	1	0.311509	0.993099
5' LTBP3	1	0.622108	0.0923	0.539882	1	0.312224	0.993099
5' MED24	0.538462	0.00848679	0.8167	1	0.1137	0.313554	0.993099
5' PCMT1	1	0.6262	0.0931	0.540273	1	0.314127	0.993099
5' SLIT3	0.5	0.320671	0.4149	1	0.2289	0.318549	1
5' FBXL17	1	0.621602	0.0955	0.541412	1	0.319794	1
5' LYST	0.5	0.608007	0.0966	0.543467	1	0.322371	1
5' FRYL	1	0.226603	0.496	1	0.2117	0.341656	1
5' GRB7	0.571429	0.617637	0.262	0.971803	0.4056	0.344497	1
5' MCM5	0.5	0.245577	0.4884	1	0.2208	0.348008	1
5' BCL2L13	0.75	0.250307	0.4835	1	0.2257	0.350867	1
5' PSMD8	0.75	0.766753	0.1096	0.595019	1	0.351917	1
5' GRIK2	0.5	0.588499	0.1108	0.596055	1	0.354563	1
5' COBL	0.75	0.229268	0.4963	1	0.2269	0.358532	1
5' RELN	0.75	0.233479	0.5007	1	0.2279	0.361795	1
5' ROBO1	0.6	0.208894	0.5224	1	0.2264	0.370754	1
5' DHRSX	1	0.560537	0.1187	0.629366	1	0.371668	1
5' PRPF3	1	0.562025	0.1219	0.632678	1	0.378445	1
5' MAP1B	0.5	0.573614	0.1231	0.634438	1	0.380965	1
5' COMMD10	1	0.175785	0.5532	1	0.224	0.382673	1
5' ATP2C1	0.5	0.556594	0.1253	0.641292	1	0.385554	1
5' MYO5A	1	-0.150141	0.8631	1	0.1463	0.387568	1
5' TMEM132D	1	0.1724	0.5544	1	0.2298	0.3899	1
5' WIPF2	0.5	0.709485	0.1278	0.649577	1	0.390722	1
5' STK38	0.75	0.158786	0.5787	1	0.223	0.393287	1
5' TM9SF2	0.8	0.515737	0.3265	1	0.4027	0.398243	1
5' ARHGAP44	0.75	0.131296	0.6015	1	0.2253	0.406371	1
5' DPP3	1	-0.291477	0.91	1	0.15	0.40833	1
5' ZNF14	1	0.525803	0.1408	0.710751	1	0.416826	1
5' FANCI	1	0.519588	0.1424	0.710785	1	0.419954	1
5' YBX3	0.5	0.0943424	0.6379	1	0.2251	0.422271	1
5' PTPRU	0.5	0.523008	0.1451	0.712925	1	0.425191	1
5' RIMKLB	1	0.677201	0.1544	0.753595	1	0.442851	1
5' UST	0.6	0.0600366	0.6726	1	0.2299	0.443282	1
5' ANKLE2	0.571429	0.440067	0.3862	1	0.4022	0.444585	1
5' PTPRF	0.5	0.660871	0.1565	0.753859	1	0.44676	1
5' STXBP4	0.75	0.0466612	0.6798	1	0.2313	0.448127	1
5' CHD1	0.6	0.0172109	0.7048	1	0.2315	0.458975	1
5' SPAG5	0.6	0.0138231	0.7138	1	0.2286	0.459	1
5' SPRED2	1	0.644187	0.1665	0.786606	1	0.464995	1
5' CDKN2A	0.777778	0.292974	0.6714	1	0.2485	0.465609	1
5' ALCAM	0.75	-0.0195445	0.744	1	0.2251	0.466739	1
5' CUL3	0.666667	0.478407	0.1685	0.790984	1	0.468568	1
5' DDX52	0.6	-0.0534356	0.7697	1	0.2221	0.472914	1
5' GP2	1	-0.0810204	0.7922	1	0.2172	0.474881	1
5' MTDH	0.5	-0.0472337	0.7614	1	0.2268	0.47597	1
5' PIAS1	1	-0.0296497	0.7573	1	0.2306	0.47938	1
5' FXR1	0.5	-0.0564877	0.7717	1	0.2266	0.479788	1
5' NFYA	1	0.471998	0.1759	0.810239	1	0.481586	1
5' CDC37	1	-0.0884401	0.8014	1	0.2216	0.484515	1
5' FAM172A	0.666667	0.467044	0.182	0.827988	1	0.492082	1
5' CD44	0.5	-0.0801418	0.7909	1	0.2343	0.497688	1
5' IRF2BP2	0.75	-0.144519	0.8351	1	0.2274	0.505376	1
5' DPP8	1	0.4462	0.1925	0.859833	1	0.509674	1
5' EPC1	0.6	-0.179195	0.8551	1	0.2265	0.511615	1
5' RNF13	1	0.435306	0.1943	0.862645	1	0.512632	1
5' SLC22A5	1	0.431557	0.1976	0.872043	1	0.51801	1
5' KDM5A	0.857143	-0.22291	0.8939	1	0.2226	0.520247	1
5' DNAJC1	0.8	0.288007	0.5231	1	0.3857	0.524712	1
5' OGT	0.666667	0.424501	0.2043	0.893994	1	0.528762	1
5' STN1	0.5	0.42236	0.205	0.893994	1	0.529873	1
5' ABR	0.538462	0.0565175	0.7914	1	0.2592	0.53008	1
5' B3GLCT	0.666667	0.281443	0.5173	1	0.3985	0.531683	1
5' KIF16B	0.5	0.568476	0.2069	0.896972	1	0.532875	1
5' TRIT1	0.75	-0.333636	0.9269	1	0.2257	0.536488	1
5' SHC1	0.5	0.416374	0.2123	0.908257	1	0.541313	1
5' VWA8	0.666667	0.427224	0.2132	0.908257	1	0.542706	1
5' ZNF236	0.666667	0.408791	0.22	0.931839	1	0.553108	1
5' RICTOR	0.5	-0.819774	0.9934	1	0.2234	0.556015	1
5' EDA	1	0.406785	0.222	0.933813	1	0.556127	1
5' TSPAN31	1	-0.190101	0.8937	1	0.2516	0.560406	1
5' ARHGAP32	0.6	-1.23468	0.9999	1	0.2254	0.561185	1
5' RHOA	1	-0.876195	0.997	1	0.2263	0.561548	1
5' EPB41L4A	0.6	0.546048	0.229	0.938978	1	0.566554	1
5' INPP5A	0.7	0.491742	0.54	1	0.4247	0.567052	1
5' DPM1	0.6	0.537355	0.2295	0.938978	1	0.56729	1
5' MED15	0.666667	0.227792	0.5659	1	0.4081	0.569411	1
5' MLLT10	0.5	0.222705	0.589	1	0.3952	0.572084	1
5' IPO11	1	0.394451	0.2335	0.938978	1	0.573143	1
5' ACTR2	1	0.536755	0.2339	0.938978	1	0.573724	1
5' NFKBIE	1	0.386991	0.2355	0.938978	1	0.576043	1
5' ANKFY1	1	0.384873	0.2357	0.938978	1	0.576333	1
5' CUL5	0.666667	0.387526	0.2396	0.949383	1	0.581937	1
5' EFR3B	1	0.385075	0.2414	0.9514	1	0.584502	1
5' COPS2	1	0.378313	0.2457	0.955399	1	0.590575	1
5' RFX3	0.5	0.376731	0.2457	0.955399	1	0.590575	1
5' ABCC4	0.75	0.516965	0.2464	0.955399	1	0.591557	1
5' PTPA	1	0.495022	0.2572	0.971803	1	0.606452	1
5' ZNRF3	0.642857	0.998789	0.357	1	0.7234	0.607881	1
5' SLC47A2	1	0.495326	0.2618	0.971803	1	0.612658	1
5' SHB	0.5	0.503424	0.2624	0.971803	1	0.613461	1
5' POLR2F	0.666667	0.360559	0.2645	0.974683	1	0.616262	1
5' COG5	0.571429	0.117978	0.6659	1	0.3981	0.617053	1
5' CLCF1	1	0.355577	0.2663	0.976433	1	0.61865	1
5' OBSCN	0.6	0.491937	0.2723	0.98917	1	0.626522	1
5' CHMP5	0.666667	0.343408	0.2783	0.995666	1	0.634261	1
5' NFIC	0.625	0.693692	0.2868	1	1	0.645005	1
5' INTS1	1	0.330811	0.2894	1	1	0.64824	1
5' SMG1	0.625	0.367499	0.5227	1	0.5598	0.6522	1
5' ILVBL	1	0.329192	0.2948	1	1	0.654886	1
5' SMARCC1	0.555556	0.358733	0.5294	1	0.5589	0.656205	1
5' TBL1XR1	1	0.0218786	0.7358	1	0.4035	0.657438	1
5' FZR1	0.5	0.323169	0.3014	1	1	0.662874	1
5' SARNP	0.75	0.489991	0.491	1	0.6323	0.673604	1
5' GPC3	1	0.310057	0.3126	1	1	0.676101	1
5' ULK4	1	0.300845	0.3135	1	1	0.677146	1
5' TOM1L2	0.666667	-0.0552921	0.8012	1	0.3934	0.679104	1
5' EARS2	1	0.306979	0.3185	1	1	0.682906	1
5' AFF4	0.666667	0.290266	0.3216	1	1	0.686438	1
5' WDR59	0.666667	0.531341	0.3257	1	1	0.691063	1
5' CPAMD8	0.6	0.410851	0.3274	1	1	0.692966	1
5' NUMB	0.5	0.292665	0.3281	1	1	0.693747	1
5' PPP3R1	0.5	0.290505	0.3296	1	1	0.695415	1
5' MBTD1	1	0.405839	0.3363	1	1	0.702783	1
5' RNF169	0.5	0.283979	0.3416	1	1	0.708518	1
5' STK10	0.8	-0.18827	0.8684	1	0.3948	0.709852	1
5' REV1	0.666667	0.277205	0.3465	1	1	0.713746	1
5' PLEKHG5	0.666667	0.273201	0.3478	1	1	0.715121	1
5' ADAMTS9	0.666667	0.274412	0.3484	1	1	0.715754	1
5' RAD50	1	0.272116	0.3489	1	1	0.716281	1
5' PAIP1	1	0.261006	0.349	1	1	0.716386	1
5' ATP8A2	1	0.274354	0.3519	1	1	0.719427	1
5' SLX4IP	0.6	0.39013	0.3527	1	1	0.720262	1
5' LRP3	0.666667	0.267032	0.3541	1	1	0.721718	1
5' BCL2L11	1	0.265352	0.3591	1	1	0.726874	1
5' NBEAL2	1	0.267927	0.3602	1	1	0.727999	1
5' IFFO2	1	0.261997	0.3612	1	1	0.729018	1
5' AURKA	1	0.251501	0.3671	1	1	0.734979	1
5' AK4	1	0.25365	0.3713	1	1	0.739164	1
5' CALM3	1	0.251866	0.3725	1	1	0.740351	1
5' SASH1	0.777778	-0.213972	0.8899	1	0.4285	0.748959	1
5' ULK1	0.8	-0.549173	0.9696	1	0.3963	0.751773	1
5' RPN1	1	0.229687	0.3846	1	1	0.752105	1
5' CBX5	0.5	0.238418	0.3849	1	1	0.752392	1
5' TMEM165	0.75	0.35282	0.3872	1	1	0.754581	1
5' AK3	0.666667	0.238848	0.3877	1	1	0.755055	1
5' ETHE1	0.666667	0.45766	0.3883	1	1	0.755623	1
5' UBE2L3	1	0.426484	0.3984	1	1	0.765047	1
5' ALDOA	0.666667	0.240032	0.3988	1	1	0.765415	1
5' TRIM35	1	0.221292	0.4023	1	1	0.768617	1
5' ZC3H15	0.8	-1.41468	0.9996	1	0.4032	0.769289	1
5' TMEM248	1	0.224185	0.4051	1	1	0.771157	1
5' NEMF	0.6	0.312926	0.4077	1	1	0.773498	1
5' STAT5B	1	0.219872	0.4081	1	1	0.773857	1
5' MAX	0.666667	0.223404	0.4125	1	1	0.777777	1
5' SCRN2	0.666667	0.209394	0.4156	1	1	0.78051	1
5' DNAJC8	1	0.210955	0.4205	1	1	0.784784	1
5' HID1	1	0.309615	0.4224	1	1	0.786425	1
5' RNF213	0.5	-1.33487	0.9987	1	0.4296	0.792097	1
5' SMURF1	0.538462	-1.89613	1	1	0.4294	0.7924	1
5' INTS11	0.5	0.208871	0.4303	1	1	0.79316	1
5' JADE2	1	0.207496	0.4334	1	1	0.795763	1
5' KIF13B	0.615385	0.19309	0.7505	1	0.5785	0.796402	1
5' CAPN5	1	0.200144	0.4357	1	1	0.79768	1
5' RAB1A	0.666667	0.193267	0.4394	1	1	0.800738	1
5' SCFD2	1	0.178831	0.4494	1	1	0.808849	1
5' MYO9B	0.5	0.281765	0.4497	1	1	0.809089	1
5' MTA2	0.666667	0.17666	0.4522	1	1	0.81108	1
5' ZNF638	1	0.190466	0.4559	1	1	0.814001	1
5' C19orf25	1	0.17949	0.4565	1	1	0.814472	1
5' SYMPK	0.75	0.257758	0.4629	1	1	0.819446	1
5' MAD1L1	0.666667	0.175449	0.4631	1	1	0.8196	1
5' PLEKHA2	0.666667	0.176518	0.4658	1	1	0.821671	1
5' ZBTB20	1	0.16768	0.4662	1	1	0.821976	1
5' SH3GLB2	0.666667	0.167715	0.4663	1	1	0.822052	1
5' SPG11	1	0.163685	0.4664	1	1	0.822129	1
5' ARHGEF2	1	0.535482	0.4695	1	1	0.824483	1
5' ATP11A	0.555556	0.436682	0.4704	1	1	0.825162	1
5' NFE2L1	0.857143	0.525912	0.4762	1	1	0.829501	1
5' ACSS1	0.666667	0.162589	0.4765	1	1	0.829724	1
5' RAB11FIP3	0.666667	0.154286	0.4798	1	1	0.832158	1
5' PXK	0.5	0.155424	0.4799	1	1	0.832232	1
5' KLF6	1	0.160668	0.4832	1	1	0.834643	1
5' FAF1	0.636364	0.417145	0.5898	1	0.8203	0.835089	1
5' HARBI1	1	0.164369	0.4852	1	1	0.836094	1
5' ARPP19	1	0.153775	0.4855	1	1	0.836311	1
5' SNX6	1	0.241213	0.4864	1	1	0.83696	1
5' CD83	1	0.157438	0.4865	1	1	0.837032	1
5' COL16A1	0.5	0.146295	0.499	1	1	0.845879	1
5' EPS15	0.6	0.239287	0.4995	1	1	0.846227	1
5' KLF7	0.666667	0.144354	0.5002	1	1	0.846712	1
5' DYNC1LI1	1	0.141196	0.5016	1	1	0.84768	1
5' PABPC1	1	-0.249845	0.8956	1	0.563	0.849483	1
5' CEP135	1	0.140022	0.5083	1	1	0.852258	1
5' CAPRIN1	0.5	0.134563	0.5131	1	1	0.855484	1
5' DNMT3A	0.666667	0.125407	0.5144	1	1	0.85635	1
5' AP1M2	0.666667	0.134523	0.515	1	1	0.856748	1
5' TBC1D9B	0.666667	0.123931	0.5222	1	1	0.861476	1
5' CIC	0.666667	0.121426	0.5246	1	1	0.86303	1
5' ABCG1	0.5	0.125983	0.5296	1	1	0.866231	1
5' MAST2	0.538462	0.314978	0.6497	1	0.816	0.866584	1
5' ADAMTS12	1	0.12304	0.5308	1	1	0.866993	1
5' PPP6R3	0.6	0.190946	0.5347	1	1	0.869449	1
5' PARD3B	1	0.274631	0.5354	1	1	0.869886	1
5' KANSL3	0.666667	0.112848	0.539	1	1	0.872123	1
5' ENSA	1	0.11005	0.5483	1	1	0.877791	1
5' POLA1	0.5	0.112583	0.5486	1	1	0.877972	1
5' TJP2	1	0.107387	0.5486	1	1	0.877972	1
5' SLC44A1	0.666667	0.104881	0.5524	1	1	0.88024	1
5' APPL2	1	0.103557	0.5549	1	1	0.881718	1
5' RTN4	1	0.0934368	0.5565	1	1	0.882658	1
5' ARHGAP23	0.625	-0.893664	0.9924	1	0.5617	0.883203	1
5' ENG	1	0.176809	0.5594	1	1	0.88435	1
5' MYO18A	0.857143	-0.198361	0.8824	1	0.6346	0.884682	1
5' MED23	0.75	0.170455	0.5601	1	1	0.884756	1
5' CCDC61	0.666667	0.0948271	0.5602	1	1	0.884814	1
5' MARCH9	0.5	0.170382	0.5605	1	1	0.884988	1
5' SDC2	1	0.0888769	0.5698	1	1	0.890295	1
5' NCKAP1	1	0.0848238	0.5728	1	1	0.891975	1
5' FXR2	1	0.159589	0.5734	1	1	0.892309	1
5' GTPBP2	0.666667	0.0836569	0.574	1	1	0.892642	1
5' PLEKHO2	1	0.0864597	0.5754	1	1	0.893418	1
5' FAR2	1	0.0829221	0.5755	1	1	0.893473	1
5' PEX1	0.666667	0.078536	0.5803	1	1	0.896105	1
5' PSKH1	0.666667	0.0826271	0.5814	1	1	0.896703	1
5' APPL1	1	0.0809667	0.584	1	1	0.898107	1
5' REPS2	0.777778	0.204492	0.7143	1	0.8207	0.8993	1
5' ACAP3	0.75	0.142391	0.5865	1	1	0.899446	1
5' NFIB	0.5	0.0764057	0.5938	1	1	0.903296	1
5' GLOD4	1	0.0685059	0.5961	1	1	0.90449	1
5' HM13	0.666667	0.0652853	0.5964	1	1	0.904646	1
5' NUP85	0.6	0.133409	0.5972	1	1	0.905059	1
5' CUL4A	0.625	0.282018	0.5987	1	1	0.90583	1
5' PNPLA7	0.75	0.135611	0.6018	1	1	0.907412	1
5' PLCB4	1	0.0583148	0.6098	1	1	0.911422	1
5' ENAH	0.666667	0.0424926	0.6297	1	1	0.920944	1
5' TFB2M	1	-1.92691	0.9997	1	0.6315	0.921686	1
5' KIF26B	1	0.0393072	0.6326	1	1	0.922278	1
5' LSM12	1	0.0367038	0.6352	1	1	0.923464	1
5' FOSL2	1	0.0327737	0.6375	1	1	0.924503	1
5' TRIM16	1	0.0283638	0.6414	1	1	0.926247	1
5' CADPS2	0.75	0.09219	0.6419	1	1	0.926469	1
5' KAZN	0.5	0.0334189	0.6421	1	1	0.926558	1
5' PARVA	1	0.0331011	0.6421	1	1	0.926558	1
5' SNX9	0.666667	0.0358604	0.6428	1	1	0.926867	1
5' DDR1	1	0.0329832	0.6445	1	1	0.927616	1
5' BAX	0.75	0.0790478	0.6488	1	1	0.929491	1
5' ZNF700	1	0.0856906	0.6493	1	1	0.929707	1
5' EHD1	0.5	0.0283174	0.6518	1	1	0.930782	1
5' SIPA1	0.666667	0.0237099	0.6554	1	1	0.932313	1
5' TGFBR3	0.666667	0.0202007	0.6568	1	1	0.932903	1
5' PSD3	0.5	0.0121864	0.6631	1	1	0.935521	1
5' HNF1B	1	0.0176451	0.6644	1	1	0.936054	1
5' PPIG	1	0.0116779	0.6648	1	1	0.936217	1
5' URB1	1	0.0180724	0.6671	1	1	0.937152	1
5' RNF41	1	0.00849191	0.6736	1	1	0.939752	1
5' EFNA3	0.5	0.0113857	0.6761	1	1	0.940735	1
5' NHSL1	0.5	0.0130692	0.6764	1	1	0.940853	1
5' DDX39B	0.8	0.0842388	0.6836	1	1	0.943629	1
5' MYO19	1	0.00025243	0.6848	1	1	0.944085	1
5' NOMO1	1	0.00247512	0.6871	1	1	0.944952	1
5' SRRM2	0.666667	0.00441507	0.6875	1	1	0.945102	1
5' SCYL2	0.666667	-0.00259175	0.6877	1	1	0.945177	1
5' XPNPEP3	0.666667	-0.00185603	0.688	1	1	0.945289	1
5' STAG2	0.666667	-0.00676972	0.6929	1	1	0.947104	1
5' SUMO2	0.666667	0.00213401	0.6934	1	1	0.947287	1
5' TXNRD2	0.666667	0	0.6941	1	1	0.947543	1
5' IPPK	0.666667	0.0626884	0.7012	1	1	0.950099	1
5' STX6	1	-0.0146317	0.7036	1	1	0.950947	1
5' P3H4	1	-0.0149791	0.704	1	1	0.951088	1
5' TXNDC11	0.5	-0.0163907	0.706	1	1	0.951787	1
5' E2F3	0.5	-0.0196561	0.7122	1	1	0.953918	1
5' RNF43	0.666667	-0.0235992	0.7142	1	1	0.954594	1
5' UCKL1	0.666667	-0.02106	0.7151	1	1	0.954897	1
5' TASP1	0.666667	0.0495584	0.719	1	1	0.956194	1
5' FAT1	0.6	0.00901012	0.719	1	1	0.956194	1
5' POLB	1	0.00527869	0.7197	1	1	0.956424	1
5' MAP4K3	0.5	0.00221334	0.7226	1	1	0.957372	1
5' ARID1A	0.777778	-0.647782	0.9749	1	0.7495	0.959955	1
5' SOX6	0.75	-0.00497434	0.7307	1	1	0.959959	1
5' ENTPD5	0.5	-0.0408555	0.734	1	1	0.960987	1
5' FIP1L1	0.75	-0.0068922	0.7343	1	1	0.961079	1
5' NEK7	1	-0.0384979	0.7365	1	1	0.961756	1
5' RPN2	0.666667	0.0315104	0.7373	1	1	0.962	1
5' AXL	1	-0.0463544	0.7398	1	1	0.962758	1
5' USP45	1	-0.0449406	0.7405	1	1	0.962968	1
5' MMP15	0.666667	-0.0373655	0.7426	1	1	0.963596	1
5' GSR	0.5	-0.0393821	0.7447	1	1	0.964218	1
5' SPARC	0.666667	-0.0574517	0.7497	1	1	0.965675	1
5' DNAJC4	0.666667	-0.0542142	0.7504	1	1	0.965877	1
5' APC	0.666667	-0.0596143	0.7561	1	1	0.967492	1
5' PCNX1	0.5	-0.060301	0.7561	1	1	0.967492	1
5' ARFGAP2	0.666667	-0.058669	0.7568	1	1	0.967687	1
5' MFSD2A	1	-0.0635866	0.7605	1	1	0.968709	1
5' ATG2A	0.75	-0.0538145	0.7679	1	1	0.970699	1
5' PLEKHA1	1	-0.0721356	0.7692	1	1	0.971041	1
5' NAA15	0.75	-0.0569236	0.7701	1	1	0.971277	1
5' ZBTB7A	0.666667	-0.0684246	0.7707	1	1	0.971434	1
5' METTL16	0.5	-0.0776144	0.7738	1	1	0.972235	1
5' LMBRD1	1	-0.0769769	0.7746	1	1	0.972439	1
5' RPTOR	0.5	-0.0340253	0.7764	1	1	0.972897	1
5' SNX19	1	-0.0723788	0.7764	1	1	0.972897	1
5' USP48	0.571429	-0.0281305	0.7796	1	1	0.9737	1
5' MRPL42	1	-0.0791682	0.7807	1	1	0.973973	1
5' DTNB	0.666667	-0.0807407	0.7817	1	1	0.97422	1
5' SLC24A3	1	-0.0625426	0.7828	1	1	0.974491	1
5' LMAN2	0.571429	-0.0450196	0.7835	1	1	0.974662	1
5' CEP85L	0.666667	-0.0878636	0.7861	1	1	0.975292	1
5' CAPN1	0.666667	-0.0883435	0.7891	1	1	0.976008	1
5' CUX1	0.8	-0.134963	0.8817	1	0.8952	0.976055	1
5' CECR2	0.666667	-0.0990521	0.7919	1	1	0.976666	1
5' DHX40	0.5	-0.0799505	0.7943	1	1	0.977223	1
5' WARS2	0.75	-0.00393995	0.798	1	1	0.978066	1
5' SLBP	0.666667	-0.103723	0.8037	1	1	0.979332	1
5' GNE	0.666667	-0.0992386	0.8049	1	1	0.979593	1
5' ARHGAP21	0.666667	-0.103948	0.8056	1	1	0.979745	1
5' PSPC1	1	-0.106222	0.8058	1	1	0.979788	1
5' MIGA1	1	-0.110798	0.8066	1	1	0.97996	1
5' PDIA5	0.5	-0.112077	0.8095	1	1	0.980579	1
5' RALGAPA2	0.6	-0.0974221	0.8129	1	1	0.98129	1
5' DDX19B	1	-0.108377	0.8145	1	1	0.98162	1
5' BPIFB1	1	-0.122853	0.8232	1	1	0.983359	1
5' CLPX	1	-0.129219	0.8239	1	1	0.983494	1
5' BRD9	0.6	-0.11863	0.8255	1	1	0.983803	1
5' TM2D2	0.666667	-0.120575	0.8257	1	1	0.983841	1
5' NAV1	0.666667	-0.12636	0.8273	1	1	0.984146	1
5' NCEH1	0.666667	-0.138982	0.8291	1	1	0.984485	1
5' CUX2	0.666667	-0.136567	0.8348	1	1	0.985534	1
5' STAU2	0.666667	-0.152705	0.8394	1	1	0.986352	1
5' DYNC1H1	0.666667	-0.151608	0.84	1	1	0.986457	1
5' PDXK	0.666667	-0.147841	0.8439	1	1	0.987128	1
5' ADNP	1	-0.15121	0.8441	1	1	0.987162	1
5' USP8	0.75	-0.160675	0.8442	1	1	0.987179	1
5' CPQ	1	-0.155262	0.8444	1	1	0.987212	1
5' RNPEP	0.666667	-0.157527	0.8472	1	1	0.987681	1
5' UBE2D2	0.666667	-0.165508	0.8488	1	1	0.987945	1
5' BTBD1	0.6	-0.161093	0.8504	1	1	0.988206	1
5' MOK	0.5	-0.170078	0.8537	1	1	0.988734	1
5' MEIS2	0.75	-0.174342	0.8574	1	1	0.989312	1
5' LMAN2L	0.75	-0.176345	0.8589	1	1	0.989541	1
5' RNF122	0.666667	-0.174053	0.8599	1	1	0.989693	1
5' PPP2R5C	0.666667	-0.176998	0.8612	1	1	0.989888	1
5' TMEM63A	0.666667	-0.176577	0.8633	1	1	0.990199	1
5' ZNF532	1	-0.184683	0.8652	1	1	0.990476	1
5' SOX5	0.5	-0.185569	0.8674	1	1	0.990792	1
5' PTK2	0.5	-0.203233	0.8683	1	1	0.99092	1
5' SLC39A11	0.857143	-0.162282	0.8738	1	1	0.991679	1
5' PIAS2	1	-0.190497	0.8738	1	1	0.991679	1
5' NOTCH3	1	-0.212732	0.874	1	1	0.991706	1
5' GDI2	0.666667	-0.192938	0.875	1	1	0.99184	1
5' UIMC1	0.6	-0.225	0.8757	1	1	0.991933	1
5' DTD1	0.6	-0.207623	0.8766	1	1	0.992052	1
5' ANO2	1	-0.208432	0.8767	1	1	0.992065	1
5' SNAP29	0.666667	-0.199232	0.8771	1	1	0.992118	1
5' TRIOBP	0.5	-0.203625	0.8779	1	1	0.992222	1
5' GINM1	1	-0.197536	0.8784	1	1	0.992287	1
5' UHRF2	0.5	-0.224263	0.8907	1	1	0.993796	1
5' MBTPS1	1	-0.230059	0.8926	1	1	0.994014	1
5' VOPP1	1	-0.222953	0.8943	1	1	0.994206	1
5' SLTM	0.666667	-0.235482	0.8967	1	1	0.994471	1
5' EHBP1L1	0.666667	-0.233891	0.897	1	1	0.994503	1
5' SEC61G	0.5	-0.232318	0.8979	1	1	0.994601	1
5' NOMO3	0.666667	-0.242831	0.8984	1	1	0.994654	1
5' SCD5	0.5	-0.235241	0.9001	1	1	0.994835	1
5' ELMO2	1	-0.23866	0.9026	1	1	0.995095	1
5' CALCB	0.666667	-0.250475	0.9059	1	1	0.995427	1
5' MUC1	1	-0.26715	0.9075	1	1	0.995584	1
5' PDE9A	0.75	-0.285339	0.908	1	1	0.995632	1
5' RPS6KA3	0.5	-0.247655	0.9084	1	1	0.99567	1
5' PRMT1	0.666667	-0.271753	0.9127	1	1	0.996073	1
5' MKNK2	0.5	-0.28202	0.9149	1	1	0.996272	1
5' TFEB	0.666667	-0.271831	0.9154	1	1	0.996316	1
5' ST8SIA1	0.75	-0.300637	0.9155	1	1	0.996325	1
5' LDLRAD3	0.8	-0.316391	0.9158	1	1	0.996351	1
5' RPS6KA1	1	-0.279695	0.9161	1	1	0.996378	1
5' TESK2	0.666667	-0.286638	0.9169	1	1	0.996447	1
5' ALG14	0.75	-0.296436	0.9182	1	1	0.996559	1
5' SF3B3	0.5	-0.29555	0.9208	1	1	0.996777	1
5' NFIA	0.5	-0.34087	0.9236	1	1	0.997004	1
5' MRPS35	0.714286	-0.357809	0.9302	1	1	0.997505	1
5' SLC22A17	1	-0.30874	0.9303	1	1	0.997512	1
5' RPRD1B	0.75	-0.353095	0.9313	1	1	0.997584	1
5' KREMEN1	0.5	-0.30676	0.9325	1	1	0.997669	1
5' RCOR1	0.6	-0.352474	0.9329	1	1	0.997697	1
5' NAV2	0.5	-0.320176	0.9339	1	1	0.997766	1
5' RGS12	0.666667	-0.31638	0.9347	1	1	0.99782	1
5' DYNC1I1	1	-0.376558	0.9382	1	1	0.99805	1
5' IGHMBP2	0.5	-0.345474	0.9403	1	1	0.998181	1
5' PRKD2	0.833333	-0.420173	0.9443	1	1	0.998419	1
5' INO80	1	-0.353074	0.945	1	1	0.998459	1
5' TMC6	1	-0.366249	0.9474	1	1	0.998592	1
5' TYK2	0.5	-0.37878	0.9489	1	1	0.998672	1
5' STX8	0.75	-0.403014	0.9513	1	1	0.998794	1
5' DPY19L3	1	-0.377844	0.9539	1	1	0.998921	1
5' ZNF417	0.666667	-0.393225	0.954	1	1	0.998925	1
5' PPP6R2	0.5	-0.411772	0.9571	1	1	0.999066	1
5' DNMT3B	0.666667	-0.416848	0.9606	1	1	0.999213	1
5' ABCF1	1	-0.423067	0.9624	1	1	0.999284	1
5' CD63	1	-0.51343	0.9639	1	1	0.99934	1
5' BCL2L1	1	-0.500545	0.9648	1	1	0.999373	1
5' CCDC88C	1	-0.51865	0.9687	1	1	0.999505	1
5' SPPL2B	1	-0.43954	0.9696	1	1	0.999533	1
5' CAPZA2	1	-0.542574	0.971	1	1	0.999575	1
5' CFH	1	-0.496932	0.976	1	1	0.99971	1
5' AFAP1	1	-0.567423	0.9767	1	1	0.999726	1
5' WDR62	0.666667	-0.542575	0.9775	1	1	0.999745	1
5' GSAP	0.666667	-0.537455	0.98	1	1	0.999799	1
5' MPHOSPH9	0.6	-0.636243	0.9808	1	1	0.999814	1
5' TAF15	0.5	-0.533867	0.9813	1	1	0.999824	1
5' CAMK2D	0.6	-0.627565	0.9838	1	1	0.999868	1
5' RAB18	0.666667	-0.596701	0.9862	1	1	0.999904	1
5' PCNX3	0.666667	-0.610158	0.9872	1	1	0.999918	1
5' STAU1	1	-0.791073	0.9884	1	1	0.999932	1
5' RFTN1	0.5	-0.615901	0.9885	1	1	0.999934	1
5' KLHL24	0.666667	-0.715109	0.9906	1	1	0.999956	1
5' LTA4H	0.666667	-0.688841	0.9913	1	1	0.999962	1
5' SPINT2	0.5	-0.799681	0.9913	1	1	0.999962	1
5' MAP2K4	0.5	-0.765335	0.9923	1	1	0.99997	1
5' NUBPL	1	-0.782772	0.9923	1	1	0.99997	1
5' TSC2	0.5	-0.688674	0.9928	1	1	0.999974	1
5' NARF	0.666667	-0.710311	0.9933	1	1	0.999978	1
5' FRMD4B	0.75	-0.851164	0.994	1	1	0.999982	1
5' GOLPH3L	0.666667	-0.73381	0.9941	1	1	0.999983	1
5' PGD	0.6	-0.925745	0.9963	1	1	0.999993	1
5' PWP2	1	-0.935175	0.9979	1	1	0.999998	1
5' NDC1	1	-1.05182	0.998	1	1	0.999998	1
5' CDK5RAP1	0.666667	-0.925267	0.9986	1	1	0.999999	1
5' PLEKHM2	0.5	-1.09652	0.9998	1	1	1	1
5' GMDS	0.75	-2.32837	1	1	1	1	1
