# Supplementary material for: Genetic fusions favor tumorigenesis through degron loss in oncogenes
Source: Nat Commun. 2021 Nov 18;12:6704. doi: 10.1038/s41467-021-26871-y (PMC8602260; doi:10.1038/s41467-021-26871-y)
Supplement: Supplementary file 9 — Dataset 7 [file 41467_2021_26871_MOESM9_ESM.xlsx]

## Sheet: Sheet1
Motif type	Regular Expression	E3 ligase
KEN box	KEN..[DENQ]	CDH1
KEN box	KEN..[DENQ]	CDC20
ABBA	[FIVL].[ILMVP][FHY].[DE].{0,3}[DEST]	CDC20
Abox	R.L.PSN	CDH1
D box	R..L.{2,5}[LIVM]	CDC20/CDH1
D box1	[ILVMF].[ILMVP][FHY].[DE]	CDC20/CDH1
D box2	R..L..[LIVM]	CDC20/CDH1
CRY box	CRY.PS	CDH1
GxEN box	G.EN	CDC20/CDH1
Spo13_box	L.E...N	CDC20
TPR-C	[ILM]R$
SKP2_DEG	[DE].(ST)P.K	SKP2
COI1_DEG	[RK][RK].SL..F[FLM].[RK]R[HRK].[RK]	FBL2
FBXW7_DEG1	[LIVMP].{0,2}(T)P..([ST])	FBXW7
FBXW7_DEG2	[LIVMP].{0,2}(T)P..E	FBXW7
TrCP1_DEG	D(S)G.{2,3}([ST])	b-TrCP1
FBX31_DEG	D...[VI][^P][IL]	FBX31
FBXO45_DEG	[DE][IL]NNN	FBXO45
VHL_DEG	[IL]AP.{6,8}[FLIVM].[FLIVM]	VHL
KEAP_DEG1	[DNS].[DES][TNS]GE	KEAP1
KEAP_DEG2	QD.DLGV	KEAP1
SPOP_DEG	[GAPVLIMWF][QNHSTYC][ST][ST][ST]	SPOP
KLHL3_DEG	E.EE.E[AV]DQH	KLHL2
KLHL3_DEG	E.EE.E[AV]DQH	KLHL3
KLHL17_DEG	[AP]P[MV][IM]V	KLHL17
Cdt2_DEG1	[NQ]{0,1}..[ILMV][ST][DEN][FY][FY].{2,3}[KR]{2,3}[^DE]	Cdt2
Cdt2_DEG2	[NQ]{0,1}..[ILMV]T[DEN][HMFY][FMY].{2,3}[KR]{2,3}[^DE]	Cdt2
CRBN_DEG	(K)..(K)	CRBN
TIF_DEG	[VLIA][VLI]GWPP[VLI]...R	TIR1
MDM2_SWIB_1	F[^P]{3}W[^P]{2,3}[VIL]	MDM2
COP_DEG	[STDE]{1,3}.{0,2}[TSDE].{2,3}VP[STDE]G{0,1}[FLIMVYPA]	COP1
SIAH_1	P.A.V.P[^P]	SIAH
CBL_DEG1	[DN].(Y)[ST]..P	CBL
CBL_DEG2	D(Y)R	CBL
CBL_DEG3	RA[VI].NQ(Y)[ST]	CBL
ITCH_DEG	PP.Y	ITCH
TrCP1_DEG2	SSSXX(S)	b-TrCP1
