# Supplementary material for: Genetic fusions favor tumorigenesis through degron loss in oncogenes
Source: Nat Commun. 2021 Nov 18;12:6704. doi: 10.1038/s41467-021-26871-y (PMC8602260; doi:10.1038/s41467-021-26871-y)
Supplement: Supplementary file 10 — Dataset 8 [file 41467_2021_26871_MOESM10_ESM.xlsx]

## Sheet: Sheet1
Motif type	Regular Expression	E3 ligase
c-terminal degron	....EE$	N/A
c-terminal degron	....VS$	N/A
c-terminal degron	....AA$	N/A
c-terminal degron	....CR$	N/A
c-terminal degron	....RG$	N/A
c-terminal degron	....VC$	N/A
c-terminal degron	....KA$	N/A
c-terminal degron	.L.R..$	N/A
c-terminal degron	..C.C.$	N/A
c-terminal degron	....AT$	N/A
c-terminal degron	...AA.$	N/A
c-terminal degron	...R.A$	N/A
c-terminal degron	.L...G$	N/A
c-terminal degron	....GG$	N/A
c-terminal degron	....AF$	N/A
c-terminal degron	.L..A.$	N/A
c-terminal degron	.S...G$	N/A
c-terminal degron	.L...A$	N/A
c-terminal degron	..S.V.$	N/A
c-terminal degron	....SG$	N/A
c-terminal degron	..L..G$	N/A
c-terminal degron	...RG.$	N/A
c-terminal degron	..C..R$	N/A
c-terminal degron	....GA$	N/A
c-terminal degron	...R.S$	N/A
c-terminal degron	..LR..$	N/A
c-terminal degron	...AV.$	N/A
c-terminal degron	...K.G$	N/A
c-terminal degron	...R.V$	N/A
c-terminal degron	R..R..$	N/A
c-terminal degron	P...V.$	N/A
c-terminal degron	.V..V.$	N/A
c-terminal degron	....PG$	N/A
c-terminal degron	K....G$	N/A
c-terminal degron	.P..V.$	N/A
c-terminal degron	..RR..$	N/A
c-terminal degron	....AS$	N/A
c-terminal degron	...SV.$	N/A
c-terminal degron	....VG$	N/A
c-terminal degron	.L..V.$	N/A
c-terminal degron	.P...G$	N/A
c-terminal degron	...S.G$	N/A
c-terminal degron	G...V.$	N/A
c-terminal degron	...G.G$	N/A
c-terminal degron	...A.A$	N/A
c-terminal degron	...RT.$	N/A
c-terminal degron	R....G$	N/A
c-terminal degron	..T..G$	N/A
c-terminal degron	S....G$	N/A
c-terminal degron	..P..G$	N/A
c-terminal degron	..R..G$	N/A
c-terminal degron	P....G$	N/A
c-terminal degron	.S...A$	N/A
c-terminal degron	..I..G$	N/A
c-terminal degron	..AV..$	N/A
c-terminal degron	....CS$	N/A
c-terminal degron	...RV.$	N/A
c-terminal degron	..C.A.$	N/A
c-terminal degron	.V...G$	N/A
c-terminal degron	.A..A.$	N/A
c-terminal degron	....AC$	N/A
c-terminal degron	..E..A$	N/A
c-terminal degron	....RV$	N/A
c-terminal degron	A...A.$	N/A
c-terminal degron	..Q..G$	N/A
c-terminal degron	..S..G$	N/A
c-terminal degron	....VR$	N/A
c-terminal degron	..CG..$	N/A
c-terminal degron	E...C.$	N/A
c-terminal degron	..T.V.$	N/A
c-terminal degron	.M...V$	N/A
c-terminal degron	..A..A$	N/A
c-terminal degron	...V.A$	N/A
c-terminal degron	K...V.$	N/A
c-terminal degron	K....A$	N/A
c-terminal degron	....VV$	N/A
c-terminal degron	...L.A$	N/A
c-terminal degron	...RA.$	N/A
c-terminal degron	...A.G$	N/A
c-terminal degron	.L...V$	N/A
c-terminal degron	...LV.$	N/A
c-terminal degron	...C.G$	N/A
c-terminal degron	..C.V.$	N/A
c-terminal degron	.V.R..$	N/A
c-terminal degron	...PV.$	N/A
c-terminal degron	...EC.$	N/A
c-terminal degron	..Q.V.$	N/A
c-terminal degron	...R.C$	N/A
c-terminal degron	L..R..$	N/A
c-terminal degron	...GC.$	N/A
c-terminal degron	.E.R..$	N/A
c-terminal degron	Q...A.$	N/A
c-terminal degron	..E.A.$	N/A
c-terminal degron	..SA..$	N/A
c-terminal degron	....WG$	N/A
c-terminal degron	.T...G$	N/A
c-terminal degron	...RE.$	N/A
c-terminal degron	P....C$	N/A
c-terminal degron	...R.T$	N/A
c-terminal degron	A....A$	N/A
c-terminal degron	..T..A$	N/A
c-terminal degron	....GR$	N/A
c-terminal degron	..S.A.$	N/A
c-terminal degron	...P.G$	N/A
c-terminal degron	..P.V.$	N/A
c-terminal degron	.V...A$	N/A
c-terminal degron	....MA$	N/A
c-terminal degron	M....G$	N/A
c-terminal degron	.M...G$	N/A
c-terminal degron	S...V.$	N/A
c-terminal degron	..V..A$	N/A
c-terminal degron	E..R..$	N/A
c-terminal degron	...KV.$	N/A
c-terminal degron	.T..V.$	N/A
c-terminal degron	..V..G$	N/A
c-terminal degron	....VH$	N/A
c-terminal degron	G....A$	N/A
c-terminal degron	..K.V.$	N/A
c-terminal degron	....TA$	N/A
c-terminal degron	....EA$	N/A
c-terminal degron	...LC.$	N/A
c-terminal degron	E....R$	N/A
c-terminal degron	.G..V.$	N/A
c-terminal degron	...VV.$	N/A
c-terminal degron	.A.R..$	N/A
c-terminal degron	.E..V.$	N/A
c-terminal degron	.LT...$	N/A
c-terminal degron	.C.R..$	N/A
c-terminal degron	..A.V.$	N/A
c-terminal degron	E.C...$	N/A
c-terminal degron	...EV.$	N/A
c-terminal degron	R...V.$	N/A
c-terminal degron	.II...$	N/A
c-terminal degron	G....G$	N/A
c-terminal degron	....VN$	N/A
c-terminal degron	....SY$	N/A
c-terminal degron	.L...C$	N/A
c-terminal degron	..P..A$	N/A
c-terminal degron	...GA.$	N/A
c-terminal degron	A....G$	N/A
c-terminal degron	...M.G$	N/A
c-terminal degron	....MR$	N/A
c-terminal degron	AV....$	N/A
c-terminal degron	G..R..$	N/A
c-terminal degron	....AY$	N/A
c-terminal degron	....VF$	N/A
c-terminal degron	.A...A$	N/A
c-terminal degron	...VS.$	N/A
c-terminal degron	...I.A$	N/A
c-terminal degron	..A..G$	N/A
c-terminal degron	....VA$	N/A
c-terminal degron	A...V.$	N/A
c-terminal degron	M...V.$	N/A
c-terminal degron	M....A$	N/A
c-terminal degron	.Q..A.$	N/A
c-terminal degron	...T.G$	N/A
c-terminal degron	.LI...$	N/A
c-terminal degron	.T.R..$	N/A
c-terminal degron	.R...G$	N/A
c-terminal degron	..VR..$	N/A
c-terminal degron	Q....G$	N/A
c-terminal degron	S..R..$	N/A
c-terminal degron	...CV.$	N/A
c-terminal degron	H....G$	N/A
c-terminal degron	.M...S$	N/A
c-terminal degron	.P..A.$	N/A
c-terminal degron	....VK$	N/A
c-terminal degron	V....A$	N/A
c-terminal degron	T....A$	N/A
c-terminal degron	.A...S$	N/A
c-terminal degron	...IA.$	N/A
c-terminal degron	.L...T$	N/A
c-terminal degron	...G.A$	N/A
c-terminal degron	..R.A.$	N/A
c-terminal degron	.LA...$	N/A
c-terminal degron	...R.G$	N/A
c-terminal degron	..IR..$	N/A
c-terminal degron	L...A.$	N/A
c-terminal degron	LP....$	N/A
c-terminal degron	....VW$	N/A
c-terminal degron	.L..C.$	N/A
c-terminal degron	...P.C$	N/A
c-terminal degron	.V..A.$	N/A
c-terminal degron	....EL$	N/A
c-terminal degron	...IT.$	N/A
c-terminal degron	....GF$	N/A
c-terminal degron	.LE...$	N/A
c-terminal degron	..S..A$	N/A
c-terminal degron	L.V...$	N/A
c-terminal degron	.I.R..$	N/A
c-terminal degron	.A...G$	N/A
c-terminal degron	..I.A.$	N/A
c-terminal degron	...T.V$	N/A
c-terminal degron	.L..T.$	N/A
c-terminal degron	...A.S$	N/A
c-terminal degron	....TV$	N/A
c-terminal degron	..T..V$	N/A
c-terminal degron	....RE$	N/A
c-terminal degron	H...A.$	N/A
c-terminal degron	.M.R..$	N/A
c-terminal degron	E....A$	N/A
c-terminal degron	KL....$	N/A
c-terminal degron	....AG$	N/A
c-terminal degron	L....G$	N/A
c-terminal degron	...P.A$	N/A
c-terminal degron	....AV$	N/A
c-terminal degron	...R.D$	N/A
c-terminal degron	S....A$	N/A
c-terminal degron	R....V$	N/A
c-terminal degron	..L.G.$	N/A
c-terminal degron	.P.R..$	N/A
c-terminal degron	..V.E.$	N/A
c-terminal degron	..L..A$	N/A
c-terminal degron	T...A.$	N/A
c-terminal degron	.A..V.$	N/A
c-terminal degron	..CR..$	N/A
c-terminal degron	..NR..$	N/A
c-terminal degron	N...V.$	N/A
c-terminal degron	..I..A$	N/A
c-terminal degron	.I..E.$	N/A
c-terminal degron	..DR..$	N/A
c-terminal degron	...AC.$	N/A
c-terminal degron	E...V.$	N/A
c-terminal degron	P...A.$	N/A
c-terminal degron	V....G$	N/A
c-terminal degron	.LD...$	N/A
c-terminal degron	.V...V$	N/A
c-terminal degron	...CA.$	N/A
c-terminal degron	...VT.$	N/A
c-terminal degron	SL....$	N/A
c-terminal degron	R....A$	N/A
c-terminal degron	...E.G$	N/A
c-terminal degron	..N.A.$	N/A
c-terminal degron	L...E.$	N/A
c-terminal degron	.I..T.$	N/A
c-terminal degron	.K.R..$	N/A
