# Supplementary material for: Genetic fusions favor tumorigenesis through degron loss in oncogenes
Source: Nat Commun. 2021 Nov 18;12:6704. doi: 10.1038/s41467-021-26871-y (PMC8602260; doi:10.1038/s41467-021-26871-y)
Supplement: Supplementary file 12 — Source data [file 41467_2021_26871_MOESM12_ESM.xlsx]

## Sheet: Fig.2b
Fig.2b. Statistical analysis of the balance of in-frame vs out-of-frame fusions
Driver status	Fusion effect	all	>5 fusions	>10 fusions
oncogene	in-frame	809	478	334
oncogene	out-of-frame	609	265	133
passenger	out-of-frame	8469	1809	437
passenger	in-frame	7961	1702	412
tsg	out-of-frame	589	148	44
tsg	in-frame	562	140	32

## Sheet: Fig.2c
Fig.2c. Statistical analysis of gene fusions that either retain or do not retain a protein domain
Driver status	Domain_yes	Domain_no
3' oncogene	379	57
3' passenger	6811	1892
3' tsg	158	35
5' oncogene	283	114
5' passenger	4355	4159
5' tsg	226	195

## Sheet: Fig.2d
Fig.2d. Recurrence of fusion events with degron loss
Driver status	Num Patients with Degron Loss (>10 recurrent fusions)
Oncogene	93
TSG	11
Passenger	32

## Sheet: Fig.2e
Fig.2e. Frequency of fusion events stratified by degron gain and loss
Driver status	No degron affected	Degron loss	Degron Gain	Degron Gain & Loss
passenger	160	24	25	4
TSG	29	2	20	6
Oncogene	170	82	25	3

## Sheet: Fig.3c
Fig.3c. Recurrence of fusions across TCGA stratified by cancer type
Cancer type	Fusion	count
ACC	ASB4--DYNC1I1	2
BLCA	FGFR3--TACC3	6
BLCA	ERBB2--CTTN	3
BLCA	CEP350--TOR1AIP1	2
BLCA	FAM169A--ANKRD31	2
BLCA	TYMS--GNAS	2
BRCA	MRPL48--DTX4	7
BRCA	ASCC1--MICU1	3
BRCA	CABLES1--RBBP8	3
BRCA	C6orf62--KIAA0319	2
BRCA	CCM2--PPIA	2
BRCA	CHD4--CLEC9A	2
BRCA	CHD4--DTX1	2
BRCA	COL1A1--FLNA	2
BRCA	DCAF6--MPZL1	2
BRCA	EFHD1--EIF4E2	2
BRCA	ERBB2--PPP1R1B	2
BRCA	FBXL20--MSL1	2
BRCA	FBXO32--ANXA13	2
BRCA	GALNT7--SAP30	2
BRCA	MVP--KIF22	2
BRCA	NEBL--DNAJC1	2
BRCA	PACS1--ZDHHC24	2
BRCA	PUM1--SDC3	2
BRCA	RUNX2--IFT88	2
BRCA	SARS--KIAA1324	2
BRCA	TBC1D4--COMMD6	2
BRCA	TBCD--SLC9A3R1	2
BRCA	TDRD3--DIAPH3	2
BRCA	TET3--ACTG2	2
BRCA	THSD4--THAP10	2
BRCA	TMEM135--AAMDC	2
BRCA	XXYLT1--ACAP2	2
CESC	FGFR3--TACC3	5
CESC	ERBB2--PPP1R1B	2
CHOL	FGFR2--BICC1	2
COAD	VTI1A--TCF7L2	3
COAD	ARHGEF1--TMEM120A	2
COAD	CHD1--RGMB	2
COAD	CHD7--TOX	2
COAD	ETV6--NTRK3	2
ESCA	ERBB2--PSMB3	2
ESCA	FGFR3--TACC3	2
ESCA	ME1--UBE3D	2
GBM	EGFR--SEPT14	8
GBM	LANCL2--SEPT14	2
HNSC	F3--C11orf80	2
HNSC	FGFR3--TACC3	2
HNSC	TFB2M--SMYD3	2
KIRC	SFPQ--TFE3	5
KIRC	TRIP12--SLC16A14	2
KIRP	PRCC--TFE3	3
KIRP	FGFR3--TACC3	2
KIRP	SFPQ--TFE3	2
KIRP	TFE3--PRCC	2
LAML	PML--RARA	14
LAML	BCR--ABL1	4
LAML	RUNX1--RUNX1T1	4
LAML	NUP98--NSD1	3
LAML	LYZ--SMG1	2
LAML	PICALM--MLLT10	2
LAML	RPL13--MPO	2
LGG	NKD1--NOD2	3
LGG	ABR--YWHAE	2
LGG	EGFR--SEPT14	2
LGG	FGFR3--TACC3	2
LGG	MARS--OS9	2
LGG	PACRG--QKI	2
LGG	PDGFRA--FIP1L1	2
LIHC	DNAJB1--PRKACA	7
LIHC	CPS1--MAP2	2
LIHC	VAMP1--CHD4	2
LUAD	EML4--ALK	5
LUAD	E2F5--CA3	2
LUAD	ERO1B--HEATR1	2
LUAD	EZR--ROS1	2
LUAD	SLC34A2--ROS1	2
LUAD	SYPL1--AKR1D1	2
LUAD	TAF4--TSHZ2	2
LUAD	TLN1--SFTPB	2
LUSC	FGFR3--TACC3	5
LUSC	AKR1C3--AKR1E2	2
LUSC	CSTA--CASR	2
LUSC	CTNND1--LARGE2	2
LUSC	ERBB2--CTTN	2
LUSC	ERGIC1--RANBP17	2
LUSC	MARK3--EIF5	2
LUSC	RNF217--HDDC2	2
LUSC	TRAF7--LRRC1	2
OV	EVPL--SRP68	2
OV	NECTIN2--BCAM	2
OV	PRC1--VPS33B	2
OV	RTN4RL2--CTNND1	2
OV	SRPK2--PUS7	2
PCPG	UBTF--MAML3	7
PCPG	UNC5B--IGF2	2
PRAD	TMPRSS2--ERG	33
PRAD	CAMKK2--KDM2B	4
PRAD	ACPP--ZNF462	2
PRAD	ACVR2A--AKT3	2
PRAD	ANTXR2--CHMP1A	2
PRAD	ERG--TMPRSS2	2
PRAD	FLNA--ACTG2	2
PRAD	JMJD1C--RPL5	2
PRAD	LUC7L2--ETV1	2
PRAD	NDRG1--ERG	2
PRAD	SEC23B--KAT14	2
PRAD	TARS2--MRPS21	2
PRAD	TMPRSS2--ETV4	2
READ	MICALL2--UCKL1	2
SARC	SS18--SSX2	6
SARC	SS18--SSX1	3
SARC	ACVR2A--CPQ	2
SARC	COL4A1--FLNA	2
SARC	CPM--MYRFL	2
SARC	MYLK--FLNA	2
SARC	TRIO--TERT	2
SKCM	KCNAB2--ACOT7	2
SKCM	NOTCH2--REG4	2
SKCM	PLXNA1--TNK2	2
STAD	CLDN18--ARHGAP26	9
STAD	GP2--LYZ	2
STAD	KDM5A--NINJ2	2
TGCT	XBP1--TTC28	2
THCA	CCDC6--RET	21
THCA	RAF1--AGGF1	9
THCA	ETV6--NTRK3	6
THCA	PAX8--PPARG	5
THCA	NCOA4--RET	4
THCA	AGGF1--RAF1	3
THCA	ENTPD1--CC2D2B	3
THCA	SND1--BRAF	3
THCA	BRAF--SND1	2
THCA	ERC1--RET	2
THCA	IRF2BP2--NTRK1	2
THCA	NTRK3--ETV6	2
UCEC	DNM1L--FGD4	2
UCEC	SRGAP3--LHFPL4	2
UCS	CD44--CAPRIN1	2

## Sheet: Fig.5j
Fig. 5j. Statistical analysis for the colony formation assay of DLD1 stable cell lines that express CCDC6 or CCDC6-RET.
CCDC6	CCDC6-RET
517	675
486	739
462	711

## Sheet: Fig. 5l
Fig. 5l. The weight of DLD1 stable cell lines-derived tumors in xenograft model.
CCDC6	CCDC6-RET
0.355	0.88
0.426	0.616
0.518	0.485
0.311	0.619
0.402	0.386
0.359	0.618
0.333	0.436
0.18	0.421
0.102	0.599
0.055	0.37

## Sheet: Fig.6g
Fig. 6g. Protein half-life of RAF1-WT or mutants in cycloheximide (CHX) assay.
time (h)	WT	P646A647*	A647A648*
0	0	0	0
1	-0.20013	0.11127	-0.157807
2	-0.276326	0.117769	0.0412772
4	-0.617765	0.184251	0.0209459
8	-1.13382	-0.265581	-0.614936
16	-1.67506	-0.134259	-1.01064

## Sheet: Fig.6k
Fig. 6k. Statistical analysis for the colony formation assay of HeLa stable cell lines that express WT RAF1 or mutants.
WT	P646F647*	A647F648*
74	165	310
70	157	299
53	160	372

## Sheet: Fig.6m
Fig. 6m. The weight of HeLa stable cell lines-derived tumors in xenograft model.
WT	A647F648*
0.237	1.247
0.241	1.154
0.27	0.83
0.195	0.905
0.099	0.656
0.131	0.489
0.145	0.51
0.267	0.443
0.334	0.531
	0.485

[truncated: 18 more sheets: Fig.S2f, Fig.S2g, Fig.S3a, Fig.S3b, Fig.S3f, Fig. S4c, Fig.S4d, Fig. S4e, Fig. S4g, Fig.S4h, Fig. S4i, Fig.S4j, Fig.S4k, Fig.S5d, Fig.S5e, Fig.S5f, Fig.S5g, Fig.S5h]
